# Supplementary material for: Copper/iron controlled regioselective 1,2-carboazidation of 1,3-dienes with acetonitrile and azidotrimethylsilane
Source: Royal Society of Chemistry journal article supplement (doi:10.1039/d4ob01661k), 2024-12-18

## Supporting Information

### Copper/Iron Controlled Regioselective 1,2- Carboazidation of 1,3-Dienes with Acetonitrile and Azidotrimethylsilane

Jun-Wei Hu,<sup>a</sup> Yao Zhong,<sup>\*a</sup> and Ren-Jie Song<sup>\*a,b</sup>

- a. Key Laboratory of Jiangxi Province for Persistent Pollutants Control and Resources  
Recycle, Nanchang Hangkong University, Nanchang 330063, China.
- b. State Key Laboratory of Chemo/Biosensing and Chemometrics, Hunan University,  
Changsha 410082, China

E-mail: [srj0731@hnu.edu.cn](mailto:srj0731@hnu.edu.cn) and [zhongyao@nchu.edu.cn](mailto:zhongyao@nchu.edu.cn)

Prof. Dr. R.-J. Song and Dr. Y. Zhong

E-mail: [zhongyao@nchu.edu.cn](mailto:zhongyao@nchu.edu.cn)

E-mail: [srj0731@hnu.edu.cn](mailto:srj0731@hnu.edu.cn)

#### List of Contents

|                                           |                 |
|-------------------------------------------|-----------------|
| <b>(A) Typical experimental procedure</b> | <b>S2-S3</b>    |
| <b>(B) Analytical data</b>                | <b>S4-S18</b>   |
| <b>(C) Spectra</b>                        | <b>S19-S126</b> |

## (A) Typical experimental procedure

### (a) General Information

The  $^1\text{H}$  and  $^{13}\text{C}$  NMR spectra were recorded in  $\text{CDCl}_3$  solvents on a NMR spectrometer using TMS as the internal standard. HRMS was measured on an electrospray ionization (ESI) apparatus using time-of-flight (TOF) mass spectrometry.

### General procedure for synthesis of compound **3a**.

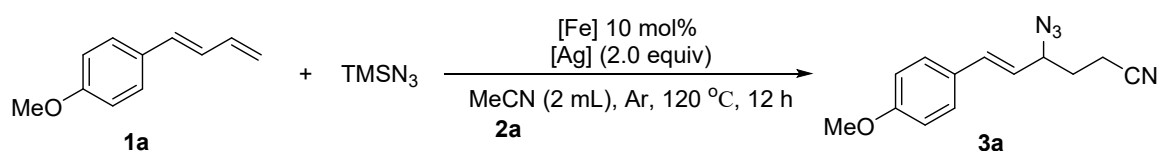

To a Schlenk tube were added substrates **1a** (0.2 mmol),  $\text{TMSN}_3$  (0.4 mmol, 2.0 equiv),  $\text{FeCl}_2$  (0.02 mmol, 10 mol%),  $\text{Ag}_2\text{CO}_3$  (0.4 mmol, 2.0 equiv) and MeCN (2 mL), the tube was then charged with Ar. The mixture was stirred at 120 °C until complete consumption of starting material as monitored by TLC (about 12 h). After the reaction was finished, the reaction mixture was concentrated in vacuum, and the resulting residue was purified by silica gel column chromatography (petroleum ether/ethyl acetate) to afford the desired product.

**One millimol reaction:** To a Schlenk tube were added substrates **1a** (1 mmol),  $\text{TMSN}_3$  (2 mmol, 2.0 equiv),  $\text{FeCl}_2$  (0.1 mmol, 10 mol%),  $\text{Ag}_2\text{CO}_3$  (2 mmol, 2.0 equiv) and MeCN (10 mL), the tube was then charged with Ar. The mixture was stirred at 120 °C until complete consumption of starting material as monitored by TLC (about 12 h). After the reaction was finished, the reaction mixture was concentrated in vacuum, and

the resulting residue was purified by silica gel column chromatography (petroleum ether/ethyl acetate) to afford the desired product **3a** (76%, 183.9 mg).

**General procedure for synthesis of compound 4a.**

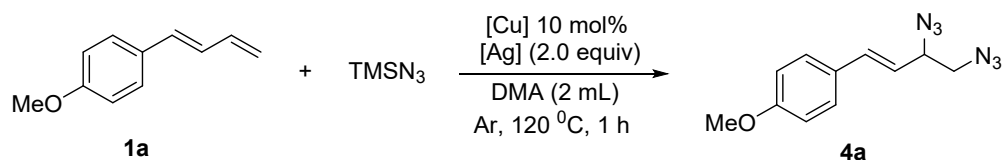

To a Schlenk tube were added substrates **1a** (0.2 mmol), TMSN<sub>3</sub> (0.6 mmol, 3.0 equiv), CuSCN (0.02 mmol, 10 mol%), Ag<sub>2</sub>CO<sub>3</sub> (0.4 mmol, 2.0 equiv) and DMA (2 mL), the tube was then charged with Ar. The mixture was stirred at 120 °C until complete consumption of starting material as monitored by TLC (about 1 h). After the reaction was finished, the reaction mixture was concentrated in vacuum, and the resulting residue was purified by silica gel column chromatography (petroleum ether/ethyl acetate) to afford the desired product.

**One millimol reaction:** To a Schlenk tube were added substrates **1a** (1 mmol), TMSN<sub>3</sub> (3 mmol, 3.0 equiv), CuSCN (0.1 mmol, 10 mol%), Ag<sub>2</sub>CO<sub>3</sub> (2 mmol, 2.0 equiv) and DMA (10 mL), the tube was then charged with Ar. The mixture was stirred at 120 °C until complete consumption of starting material as monitored by TLC (about 1 h). After the reaction was finished, the reaction mixture was concentrated in vacuum, and the resulting residue was purified by silica gel column chromatography (petroleum ether/ethyl acetate) to afford the desired product **4a** (95%, 231.8 mg).

## (B) Analytical data

### (E)-4-azido-6-(4-methoxyphenyl)hex-5-enitrile (3a):

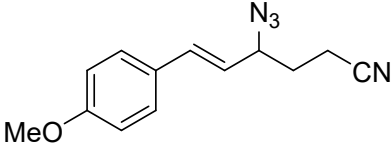 36.8 mg, 76% yield; Colorless liquid; <sup>1</sup>H NMR (500 MHz, CDCl<sub>3</sub>) δ 7.34 (d, *J* = 8.5 Hz, 2H), 6.87 (d, *J* = 8.5 Hz, 2H), 6.63 (d, *J* = 16.0 Hz, 1H), 5.95 – 5.89 (m, 1H), 4.15 (q, *J* = 7.5 Hz, 1H), 3.79 (s, 3H), 2.45 - 2.41 (m, 2H), 1.90 - 1.86 (m, 2H). <sup>13</sup>C NMR (125 MHz, CDCl<sub>3</sub>) δ 159.8, 134.5, 127.9, 127.8, 122.2, 118.8, 114.0, 63.1, 55.1, 30.3, 13.8. HRMS *m/z* (ESI) calcd for C<sub>13</sub>H<sub>15</sub>N<sub>4</sub>O([M+H]<sup>+</sup>) 243.1240, found 243.1240.

### (E)-1-(hept-1-en-6-yn-1-yl)-4-methoxybenzene (3b):

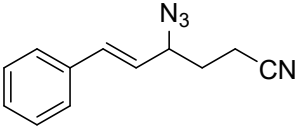 29.3 mg, 69% yield; Colorless liquid; <sup>1</sup>H NMR (500 MHz, Chloroform-*d*) δ 7.42 (d, *J* = 7.0 Hz, 2H), 7.35 (t, *J* = 7.5 Hz, 2H), 7.30 (t, *J* = 7.5 Hz, 1H), 6.71 (d, *J* = 16.0 Hz, 1H), 6.11 – 6.05 (m, 1H), 4.24 – 4.19 (m, 1H), 2.52 – 2.43 (m, 2H), 1.95 – 1.90 (m, 2H). <sup>13</sup>C NMR (125 MHz, Chloroform-*d*) δ 135.3, 135.1, 128.7, 128.6, 126.8, 124.7, 118.7, 63.0, 30.4, 14.0. HRMS *m/z* (ESI) calcd. for C<sub>12</sub>H<sub>13</sub>N<sub>4</sub>([M+H]<sup>+</sup>) 213.1135, found 213.1135.

### (E)-4-azido-6-(p-tolyl)hex-5-enitrile (3c):

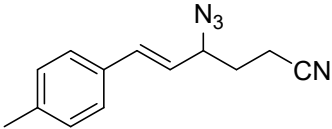 28.9 mg, 64% yield; Colorless liquid; <sup>1</sup>H NMR (500 MHz, Chloroform-*d*) δ 7.31 (d, *J* = 8.0 Hz, 2H), 7.16 (d, *J* = 7.5 Hz, 2H), 6.68 (d, *J* = 15.5 Hz, 1H), 6.05 – 5.99 (m, 1H), 4.23 – 4.17 (m, 1H), 2.50 – 2.45 (m, 2H), 2.36 (s, 3H), 1.95 – 1.89 (m, 2H). <sup>13</sup>C NMR (125 MHz, Chloroform-*d*) δ 138.7, 135.1, 132.5, 129.4, 126.7, 123.6, 118.8, 63.1, 30.5, 21.3, 14.0. HRMS *m/z* (ESI) calcd for C<sub>13</sub>H<sub>15</sub>N<sub>4</sub>([M+H]<sup>+</sup>) 227.1291, found 227.1291.

### (E)-4-azido-6-(4-bromophenyl)hex-5-enitrile (3d):

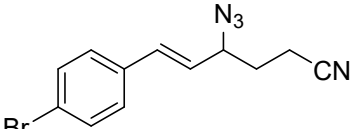 31.3 mg, 54% yield; Colorless liquid; <sup>1</sup>H NMR (500 MHz, Chloroform-*d*) δ 7.41 (d, *J* = 8.0 Hz, 2H), 7.22 – 7.19 (m, 2H), 6.58 (d, *J* = 16.0 Hz, 1H), 6.03 – 5.97 (m, 1H), 4.17 – 4.11 (m, 1H), 2.46 – 2.37 (m, 2H), 1.88 – 1.83 (m, 2H). <sup>13</sup>C NMR (125

MHz, Chloroform-*d*)  $\delta$  134.2 , 133.8 , 131.9 , 128.3 , 125.5 , 122.5 , 118.7 , 62.9 , 30.4 , 13.9. HRMS *m/z* (ESI) calcd. for C<sub>12</sub>H<sub>12</sub>BrN<sub>4</sub>([M+H]<sup>+</sup>)291.0240, found 291.0240.

**(*E*)-4-azido-6-(4-chlorophenyl)hex-5-enitrile (3e):**

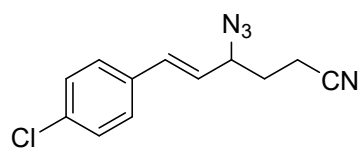

36.4 mg, 74% yield; Colorless liquid; <sup>1</sup>H NMR (500 MHz, Chloroform-*d*)  $\delta$  7.36 – 7.30 (m, 4H), 6.67 (d, *J* = 15.5 Hz, 1H), 6.09 – 6.03 (m, 1H), 4.24 – 4.19 (m, 1H), 2.53 – 2.44 (m, 2H), 1.95 – 1.90 (m, 2H). <sup>13</sup>C NMR (125 MHz, Chloroform-*d*)  $\delta$  134.3 , 133.8 , 133.7 , 128.9 , 128.0 , 125.4 , 118.7 , 62.9 , 30.4 , 13.9. HRMS *m/z* (ESI) calcd. for C<sub>12</sub>H<sub>12</sub>CIN<sub>4</sub> ([M+H]<sup>+</sup>) 247.0745, found 247.0745.

**(*E*)-4-azido-6-(4-fluorophenyl)hex-5-enitrile (3f):**

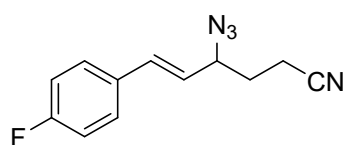

33.6 mg, 73% yield; Colorless liquid; <sup>1</sup>H NMR (500 MHz, Chloroform-*d*)  $\delta$  7.32 (t, *J* = 7.0 Hz, 2H), 6.97 (t, *J* = 8.5 Hz, 2H), 6.61 (d, *J* = 16.0 Hz, 1H), 5.96 – 5.90 (m, 1H), 4.17 – 4.11 (m, 1H), 2.46 – 2.37 (m, 2H), 1.88 – 1.83 (m, 2H). <sup>13</sup>C NMR (125 MHz, Chloroform-*d*)  $\delta$  163.9, 161.9, 134.0, 131.5, 131.4, 128.5, 128.4, 124.5, 124.5, 118.7, 115.8, 115.7, 63.0, 30.4, 14.0. <sup>19</sup>F NMR (471 MHz, Chloroform-*d*)  $\delta$  -112.59. HRMS *m/z* (ESI) calcd. for C<sub>12</sub>H<sub>12</sub>FN<sub>4</sub>([M+H]<sup>+</sup>) 231.1041, found 231.1042.

**(*E*)-4-azido-6-(3-chlorophenyl)hex-5-enitrile (3g):**

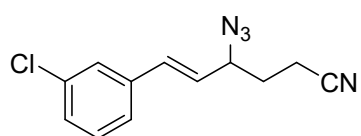

36.4 mg, 74% yield; Colorless liquid; <sup>1</sup>H NMR (500 MHz, Chloroform-*d*)  $\delta$  7.40 (s, 1H), 7.27 (s, 3H), 6.65 (d, *J* = 16.0 Hz, 1H), 6.12 – 6.06 (m, *J* = 16.0, 8.0 Hz, 1H), 4.24 – 4.18 (m, 1H), 2.50 – 2.45 (m, 2H), 1.94 – 1.89 (m, 2H). <sup>13</sup>C NMR (125 MHz, Chloroform-*d*)  $\delta$  137.1 , 134.6 , 133.5 , 129.9 , 128.4 , 126.5 , 126.3 , 125.0 , 118.6 , 62.7 , 30.2 , 13.8. HRMS *m/z* (ESI) calcd. for C<sub>12</sub>H<sub>12</sub>CIN<sub>4</sub>([M+H]<sup>+</sup>) 247.0745, found 247.0745.

**(*E*)-4-azido-6-(3-methoxyphenyl)hex-5-enitrile (3h):**

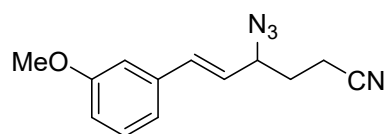

27.1 mg, 56% yield; Colorless liquid; <sup>1</sup>H NMR (500 MHz, Chloroform-*d*)  $\delta$  7.26 (t, *J* = 5.0 Hz, 1H), 7.01 (d, *J* = 7.0 Hz, 1H), 6.94 (s, 1H), 6.86 (d, *J* = 8.0 Hz, 1H), 6.68 (d, *J* = 15.5 Hz, 1H), 6.10 – 6.04 (m, 1H), 4.24 – 4.18 (m, 1H), 3.83 (s, 3H),

2.53 – 2.43 (m, 2H), 1.95 – 1.90 (m, 2H). <sup>13</sup>C NMR (125 MHz, Chloroform-*d*) δ 159.9, 136.7, 135.0, 129.7, 125.0, 119.4, 118.7, 114.2, 112.1, 63.0, 55.3, 30.4, 14.0. HRMS *m/z* (ESI) calcd. for C<sub>13</sub>H<sub>15</sub>N<sub>4</sub>O([M+H]<sup>+</sup>) 243.1240, found 243.1236.

**(*E*)-4-azido-6-(2-methoxyphenyl)hex-5-enitrile (3i):**

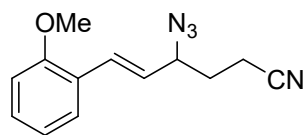

40.2 mg, 83% yield; Colorless liquid; <sup>1</sup>H NMR (500 MHz, Chloroform-*d*) δ 7.44 (d, *J* = 7.5 Hz, 1H), 7.30 – 7.26 (m, 1H), 7.01 (d, *J* = 16.0 Hz, 1H), 6.94 (t, *J* = 7.5 Hz, 1H), 6.89 (d, *J* = 8.5 Hz, 1H), 6.14 – 6.08 (m, 1H), 4.20 – 4.17 (m, 1H), 3.86 (s, 3H), 2.50 – 2.44 (m, 2H), 1.95 – 1.90 (m, 2H). <sup>13</sup>C NMR (125 MHz, Chloroform-*d*) δ 157.0, 130.3, 129.7, 127.3, 125.1, 124.2, 120.6, 118.8, 111.0, 63.5, 55.4, 30.5, 13.9. HRMS *m/z* (ESI) calcd. for C<sub>13</sub>H<sub>15</sub>N<sub>4</sub>O([M+H]<sup>+</sup>) 243.1240, found 243.1240.

**(*E*)-4-azido-6-(2-bromophenyl)hex-5-enitrile (3j):**

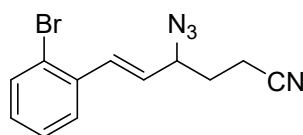

45.2 mg, 78% yield; Colorless liquid; <sup>1</sup>H NMR (500 MHz, Chloroform-*d*) δ 7.51 (d, *J* = 8.0 Hz, 1H), 7.45 (d, *J* = 8.0 Hz, 1H), 7.23 (t, *J* = 7.5 Hz, 1H), 7.09 (t, *J* = 8.0 Hz, 1H), 6.98 (d, *J* = 16.0 Hz, 1H), 5.98 – 5.92 (m, 1H), 4.23 – 4.17 (m, 1H), 2.43 (t, *J* = 7.5 Hz, 2H), 1.93 – 1.84 (m, 2H). <sup>13</sup>C NMR (125 MHz, Chloroform-*d*) δ 135.5, 133.9, 133.1, 129.8, 127.7, 127.6, 127.3, 123.8, 118.7, 62.7, 30.3, 13.9. HRMS *m/z* (ESI) calcd. for C<sub>12</sub>H<sub>12</sub>BrN<sub>4</sub>([M+H]<sup>+</sup>) 291.0240, 291.0252.

**(*E*)-4-azido-6-(2-chlorophenyl)hex-5-enitrile (3k):**

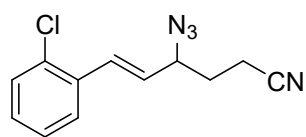

28.1 mg, 57% yield; Colorless liquid; <sup>1</sup>H NMR (500 MHz, Chloroform-*d*) δ 7.56 – 7.51 (m, 1H), 7.38 (d, *J* = 9.0 Hz, 1H), 7.26 – 7.23 (m, 2H), 7.09 (d, *J* = 16.0 Hz, 1H), 6.09 – 6.03 (m, 1H), 4.28 – 4.23 (m, 1H), 2.49 (t, *J* = 6.5 Hz, 2H), 1.97 – 1.92 (m, 2H). <sup>13</sup>C NMR (125 MHz, Chloroform-*d*) δ 133.5, 133.3, 131.2, 129.8, 129.5, 127.5, 127.0, 126.9, 118.7, 62.7, 30.3, 13.8. HRMS *m/z* (ESI) calcd for C<sub>12</sub>H<sub>12</sub>ClN<sub>4</sub>([M+H]<sup>+</sup>) 247.0745, found 247.0744.

**(*E*)-4-azido-6-(3,4-dimethoxyphenyl)hex-5-enitrile (3l):**

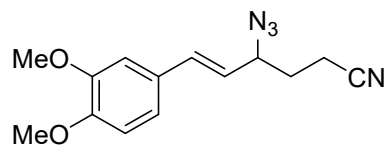

35.5 mg, 65% yield; Light red liquid; <sup>1</sup>H NMR (500 MHz, Chloroform-*d*) δ 6.97 (d, *J* = 9.0 Hz, 2H), 6.84

(d,  $J = 8.0$  Hz, 1H), 6.64 (d,  $J = 15.5$  Hz, 1H), 5.97 – 5.92 (m, 1H), 4.22 – 4.17 (m, 1H), 3.91 (s, 3H), 3.89 (s, 3H), 2.49 – 2.45 (m, 2H), 1.95 – 1.89 (m, 2H).  $^{13}\text{C}$  NMR (125 MHz, Chloroform-*d*)  $\delta$  149.5, 149.0, 134.8, 128.2, 122.5, 120.2, 118.8, 111.0, 108.9, 63.1, 55.8, 55.8, 30.4, 13.9. HRMS  $m/z$  (ESI) calcd. for  $\text{C}_{14}\text{H}_{17}\text{N}_4\text{O}_2([\text{M}+\text{H}]^+)$  273.1346, found 273.1346.

**(*E*)-4-azido-6-(2,4-dimethoxyphenyl)hex-5-enitrile (3m):**

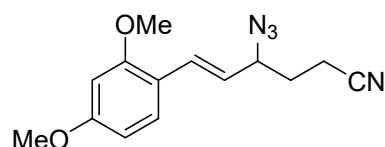

34.8 mg, 64% yield; Light yellow liquid;  $^1\text{H}$  NMR (500 MHz, Chloroform-*d*)  $\delta$  7.35 (d,  $J = 8.0$  Hz, 1H), 6.91 (d,  $J = 16.0$  Hz, 1H), 6.48 (d,  $J = 8.5$  Hz, 1H), 6.45 (s, 1H), 6.03 – 5.97 (m, 1H), 4.20 – 4.14 (m, 1H), 3.84 (s, 3H), 3.82 (s, 3H), 2.48 – 2.44 (m, 2H), 1.94 – 1.89 (m, 2H).  $^{13}\text{C}$  NMR (125 MHz, Chloroform-*d*)  $\delta$  161.2, 158.3, 130.1, 128.2, 122.7, 118.9, 117.3, 104.9, 98.4, 63.9, 55.4, 55.4, 30.6, 14.0. HRMS  $m/z$  (ESI) calcd. for  $\text{C}_{14}\text{H}_{17}\text{N}_4\text{O}_2([\text{M}+\text{H}]^+)$  273.1346, found 273.1344.

**(*E*)-4-azido-6-(naphthalen-2-yl)hex-5-enitrile (3n):**

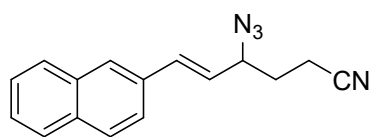

38.3 mg, 73% yield; Light yellow solid; mp 105.3-109.5 °C;  $^1\text{H}$  NMR (500 MHz, Chloroform-*d*)  $\delta$  7.73 (d,  $J = 5.5$  Hz, 3H), 7.69 (s, 1H), 7.50 (d,  $J = 8.5$  Hz, 1H), 7.39 (d,  $J = 4.0$  Hz, 2H), 6.77 (d,  $J = 15.5$  Hz, 1H), 6.12 – 6.07 (m, 1H), 4.19 – 4.14 (m, 1H), 2.43 – 2.35 (m, 2H), 1.88 – 1.83 (m, 2H).  $^{13}\text{C}$  NMR (125 MHz, Chloroform-*d*)  $\delta$  135.1, 133.4, 133.4, 132.7, 128.4, 128.1, 127.7, 127.3, 126.5, 126.4, 125.0, 123.3, 118.8, 63.1, 30.4, 14.0. HRMS  $m/z$  (ESI) calcd. for  $\text{C}_{16}\text{H}_{15}\text{N}_4([\text{M}+\text{H}]^+)$  263.1291, found 263.1291.

**(*E*)-6-(anthracen-9-yl)-4-azidohex-5-enitrile (3o):**

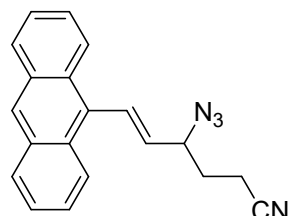

41.8 mg, 67% yield; Light yellow liquid;  $^1\text{H}$  NMR (500 MHz, Chloroform-*d*)  $\delta$  8.43 (s, 1H), 8.21 (d,  $J = 8.5$  Hz, 2H), 8.02 (d,  $J = 8.0$  Hz, 2H), 7.53 (s, 1H), 7.49 (d,  $J = 10.5$  Hz, 4H), 6.01 – 5.95 (m, 1H), 4.59 – 4.54 (m, 1H), 2.67 – 2.57 (m, 2H), 2.15 – 2.03 (m, 2H).  $^{13}\text{C}$  NMR (125 MHz, Chloroform-*d*)  $\delta$  133.7, 131.4, 131.3, 130.4, 129.3, 128.8, 127.2, 126.0, 125.3, 118.7, 63.4, 30.5, 14.2. HRMS  $m/z$  (ESI) calcd. for  $\text{C}_{20}\text{H}_{17}\text{N}_4([\text{M}+\text{H}]^+)$  313.1448, found 313.1449.

**(E)-4-azido-6-(furan-2-yl)hex-5-enitrile (3p):**

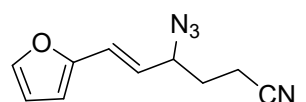

26.7 mg, 66% yield; Gray liquid;  $^1\text{H}$  NMR (500 MHz, Chloroform-*d*)  $\delta$  7.39 (s, 1H), 6.52 (d,  $J = 18.5$  Hz, 1H), 6.38 (d,  $J = 27.5$  Hz, 2H), 6.04 – 5.98 (m, 1H), 4.21 – 4.15 (m,  $J = 8.0$  Hz, 1H), 2.52 – 2.42 (m, 2H), 1.94 – 1.89 (m, 2H).  $^{13}\text{C}$  NMR (125 MHz, Chloroform-*d*)  $\delta$  150.9, 142.8, 122.9, 122.9, 118.7, 111.6, 110.1, 62.7, 30.4, 13.9. HRMS  $m/z$  (ESI) calcd. for  $\text{C}_{10}\text{H}_{11}\text{N}_4\text{O}([\text{M}+\text{H}]^+)$  203.0927, found 203.0924.

**(E)-4-azido-5-methyl-6-phenylhex-5-enitrile (3q):**

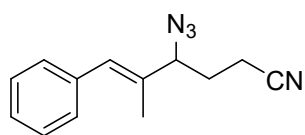

34.8 mg, 77% yield; Colorless liquid;  $^1\text{H}$  NMR (500 MHz, Chloroform-*d*)  $\delta$  7.36 (t,  $J = 7.5$  Hz, 2H), 7.31 – 7.26 (m, 3H), 6.61 (s, 1H), 4.19 – 4.15 (m, 1H), 2.47 – 2.43 (m, 2H), 1.96 – 1.90 (m, 2H), 1.90 – 1.87 (m, 3H).  $^{13}\text{C}$  NMR (125 MHz, Chloroform-*d*)  $\delta$  136.1, 133.4, 130.6, 129.0, 128.2, 127.2, 118.7, 68.9, 28.5, 14.2, 13.3. HRMS  $m/z$  (ESI) calcd. for  $\text{C}_{13}\text{H}_{15}\text{N}_4([\text{M}+\text{H}]^+)$  227.1291, found 227.1290.

**(E)-4-azido-5-benzylidenedecanenitrile (3r):**

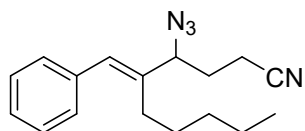

42.8 mg, 76% yield; Colorless liquid;  $^1\text{H}$  NMR (500 MHz, Chloroform-*d*)  $\delta$  7.28 (d,  $J = 8.0$  Hz, 2H), 7.19 (d,  $J = 8.0$  Hz, 3H), 6.52 (s, 1H), 4.07 (t,  $J = 6.5$  Hz, 1H), 2.42 (t,  $J = 7.5$  Hz, 2H), 2.25 – 2.11 (m, 2H), 1.92 – 1.86 (m, 2H), 1.47 – 1.38 (m, 2H), 1.23 – 1.18 (m, 4H), 0.80 (s, 3H).  $^{13}\text{C}$  NMR (125 MHz, Chloroform-*d*)  $\delta$  138.6, 136.3, 130.2, 128.7, 128.4, 127.2, 118.9, 67.0, 32.0, 29.31, 28.7, 28.4, 22.2, 14.4, 13.9. HRMS  $m/z$  (ESI) calcd. for  $\text{C}_{17}\text{H}_{23}\text{N}_4([\text{M}+\text{H}]^+)$  283.1917, found 283.1906.

**(E)-4-azido-5-benzylideneundecanenitrile (3s):**

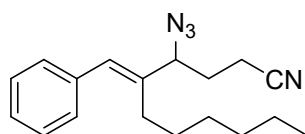

42.0 mg, 74% yield; Colorless liquid;  $^1\text{H}$  NMR (500 MHz, Chloroform-*d*)  $\delta$  7.28 (d,  $J = 7.5$  Hz, 2H), 7.19 (d,  $J = 8.0$  Hz, 3H), 6.52 (s, 1H), 4.07 (t,  $J = 6.5$  Hz, 1H), 2.42 (t,  $J = 7.5$  Hz, 2H), 2.24 – 2.12 (m, 2H), 1.92 – 1.86 (m, 2H), 1.47 – 1.35 (m, 2H), 1.25-1.18 (m, 6H), 0.80 (t,  $J = 7.0$  Hz, 3H).  $^{13}\text{C}$  NMR (125 MHz, Chloroform-*d*)  $\delta$  138.6, 136.3, 130.2, 128.7, 128.4, 127.2, 118.9, 67.0, 31.4, 29.5, 29.3, 28.9, 28.7, 22.5, 14.4, 14.0. HRMS  $m/z$  (ESI) calcd. for  $\text{C}_{18}\text{H}_{25}\text{N}_4([\text{M}+\text{H}]^+)$  285.1822, found 285.1821.



**4-azido-6,6-diphenylhex-5-enitrile (3t):**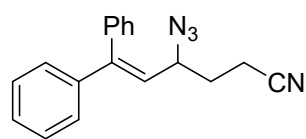

46.7 mg, 81% yield; Colorless liquid; <sup>1</sup>H NMR (500 MHz, Chloroform-*d*) δ 7.42 (t, *J* = 7.5 Hz, 2H), 7.38 (d, *J* = 7.0 Hz, 1H), 7.29 (d, *J* = 4.5 Hz, 5H), 7.17 (d, *J* = 7.5 Hz, 2H), 6.00 (d, *J* = 10.0 Hz, 1H), 4.18 – 4.12 (m, *J* = 8.0 Hz, 1H), 2.43 – 2.30 (m, 2H), 1.91-1.86 – 5.92 (m, *J* = 7.5 Hz, 2H). <sup>13</sup>C NMR (125 MHz, Chloroform-*d*) δ 148.1, 140.3, 138.0, 129.5, 128.7, 128.4, 128.3, 128.0, 127.4, 123.6, 118.7, 59.2, 30.8, 13.9. HRMS *m/z* (ESI) calcd. for C<sub>18</sub>H<sub>17</sub>N<sub>4</sub>([M+H]<sup>+</sup>) 289.1448, found 289.1455.

**(*E*)-4-azido-6-cyclopropyl-6-(4-methoxyphenyl)hex-5-enitrile (3u):**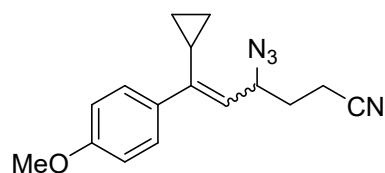

40.6 mg, 72% yield; Reddish liquid; *E/Z*=3:1; <sup>1</sup>H NMR (500 MHz, Chloroform-*d*) δ 7.17 (d, *J* = 8.0 Hz, 0.56), 6.92 (d, *J* = 7.5 Hz, 1.44H), 6.81 (d, *J* = 8.0 Hz, 1.44H), 6.76 (d, *J* = 8.0 Hz, 0.56H), 5.41 (d, *J* = 9.5 Hz, 0.28H), 5.29 (d, *J* = 9.5 Hz, 0.72H), 4.82 – 4.76 (m, 0.28H), 3.87 – 3.82 (m, 0.72H), 3.72 (s, 3H), 2.44 – 2.36 (m, 0.56H), 2.27 – 2.17 (m, 1.44H), 1.85 – 1.76 (m, 0.56H), 1.74 – 1.66 (m, 1.44H), 1.65 – 1.62 (m, 0.28H), 1.60 – 1.53 (m, 0.72H), 0.87 – 0.79 (m, 0.56H), 0.65 – 0.61 (m, 1.44H), 0.42 – 0.30 (m, 2H). <sup>13</sup>C NMR (125 MHz, Chloroform-*d*) δ 159.0, 158.9, 150.4, 148.0, 132.5, 129.7, 129.1, 128.7, 124.5, 120.5, 118.9, 118.8, 113.6, 113.2, 58.8, 57.7, 55.1, 55.1, 30.7, 30.6, 18.5, 14.0, 13.7, 11.8, 7.3, 6.7, 5.9, 5.3. HRMS *m/z* (ESI) calcd. for C<sub>16</sub>H<sub>19</sub>N<sub>4</sub>O([M+H]<sup>+</sup>) 283.1553, found 283.1548.

**4-azido-4-(4-methoxyphenyl)butanenitrile (3v):**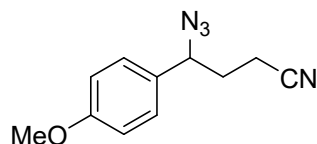

30.3 mg, 70% yield; Colorless liquid; <sup>1</sup>H NMR (500 MHz, Chloroform-*d*) δ 7.24 (d, *J* = 8.5 Hz, 2H), 6.94 (d, *J* = 8.5 Hz, 2H), 4.59 – 4.55 (m, 1H), 3.82 (s, 3H), 2.47 – 2.33 (m, 2H), 2.11 – 1.97 (m, 2H). <sup>13</sup>C NMR (125 MHz, Chloroform-*d*) δ 159.9, 129.5, 128.1, 118.7, 114.5, 63.9, 55.3, 31.9, 14.3, 62.7, 30.2, 13.8. HRMS *m/z* (ESI) calcd. for C<sub>11</sub>H<sub>13</sub>N<sub>4</sub>O ([M+H]<sup>+</sup>) 217.1084, found 217.1086.

**4-azido-4-(3-methoxyphenyl)butanenitrile (3w):**

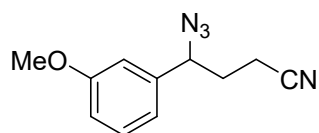

26.4 mg, 61% yield; Colorless liquid;  $^1\text{H}$  NMR (500 MHz, Chloroform-*d*)  $\delta$  7.28 – 7.24 (m, 1H), 6.83 (d,  $J = 6.5$  Hz, 2H), 6.78 (s, 1H), 4.53 (t,  $J = 7.0$  Hz, 1H), 3.76 (s, 3H), 2.44 – 2.37 (m, 1H), 2.33 – 2.25 (m, 1H), 2.04 – 1.92 (m, 2H).  $^{13}\text{C}$  NMR (125 MHz, Chloroform-*d*)  $\delta$  160.1, 139.2, 130.3, 119.0, 118.7, 114.2, 112.5, 64.2, 55.3, 31.9, 14.2. HRMS  $m/z$  (ESI) calcd. for  $\text{C}_{11}\text{H}_{13}\text{N}_4\text{O}$  ( $[\text{M}+\text{H}]^+$ ) 217.1084, found 217.1087.

**4-azido-4-(4-phenoxyphenyl)butanenitrile (3x):**

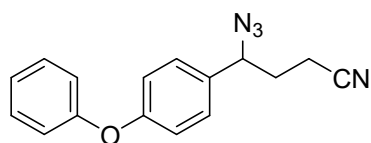

45.1 mg, 81% yield; Colorless liquid;  $^1\text{H}$  NMR (500 MHz, Chloroform-*d*)  $\delta$  7.30 – 7.27 (m, 2H), 7.20 (d,  $J = 6.0$  Hz, 2H), 7.07 (t,  $J = 7.5$  Hz, 1H), 6.97 – 6.93 (m, 4H), 4.53 (t,  $J = 7.0$  Hz, 1H), 2.44 – 2.27 (m, 2H), 2.06 – 1.89 (m, 2H).  $^{13}\text{C}$  NMR (125 MHz, Chloroform-*d*)  $\delta$  158.0, 156.4, 132.1, 129.9, 128.3, 123.8, 119.4, 118.9, 118.6, 63.8, 31.9, 14.3. HRMS  $m/z$  (ESI) calcd. for  $\text{C}_{16}\text{H}_{15}\text{N}_4\text{O}$  ( $[\text{M}+\text{H}]^+$ ) 279.1240, found 279.1240.

**4-azido-4-mesitylbutanenitrile (3y):**

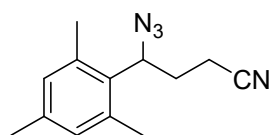

25.6 mg, 56% yield; Colorless liquid;  $^1\text{H}$  NMR (500 MHz, Chloroform-*d*)  $\delta$  6.81 (s, 2H), 5.14 – 5.09 (m, 1H), 2.47 – 2.37 (m, 2H), 2.34 (s, 6H), 2.19 (s, 3H), 2.16 – 2.11 (m, 1H), 1.90 – 1.82 (m, 1H).  $^{13}\text{C}$  NMR (125 MHz, Chloroform-*d*)  $\delta$  138.0, 136.4, 130.6, 118.9, 60.4, 29.4, 20.8, 20.6, 15.0. HRMS  $m/z$  (ESI) calcd. for  $\text{C}_{13}\text{H}_{17}\text{N}_4$  ( $[\text{M}+\text{H}]^+$ ) 229.1448, found 229.1456.

**(E)-6-azido-6-(4-methoxyphenyl)-2-phenylhex-4-enitrile (5a):**

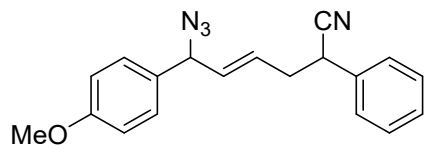

45.8 mg, 72% yield; Light yellow liquid; dr= 3:2;  $^1\text{H}$  NMR (500 MHz, Chloroform-*d*)  $\delta$  7.35 – 7.24 (m, 7H), 6.79 (d,  $J = 8.5$  Hz, 2H), 6.59 – 6.49 (m, 1H), 5.90 – 5.83 (m, 1H), 4.24 (d,  $J = 12.0$  Hz, 0.6H), 3.99 – 3.95 (m, 0.6H), 3.92 – 3.86 (m, 0.4H), 3.83 (d,  $J = 8.0$  Hz, 0.4H), 3.73 (s, 3H), 2.24 – 2.17 (m, 0.4H), 2.09 – 2.03 (m, 0.6H), 2.00 – 1.91 (m, 1H).  $^{13}\text{C}$  NMR (125 MHz, Chloroform-*d*)  $\delta$  160.0, 159.9, 135.0, 135.0, 134.6, 134.5, 129.3, 129.3, 128.5, 128.3, 128.1, 128.0, 128.0,

127.9, 127.5, 127.2, 122.4, 122.2, 120.4, 120.0, 114.1, 62.5, 61.9, 55.3, 41.0, 40.2, 34.3, 33.8. HRMS  $m/z$  (ESI) calcd. for  $C_{19}H_{19}N_4O$  ( $[M+H]^+$ ) 319.1553, found 319.1549.

**(E)-6-azido-2,6-bis(4-methoxyphenyl)hex-4-enitrile (5b):**

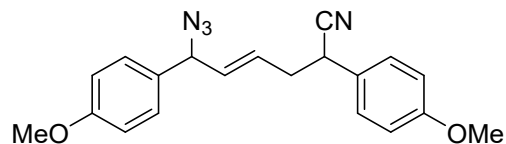

47.3 mg, 68% yield; Light yellow liquid; dr= 1:1;  $^1H$  NMR (500 MHz, Chloroform-*d*)  $\delta$  7.33 (d,  $J = 8.5$  Hz, 2H), 7.24 (d,  $J = 6.5$  Hz,

2H), 6.93 – 6.86 (m, 4H), 6.65 – 6.55 (m, 1H), 5.97 – 5.90 (m, 1H), 4.31 – 4.25 (m, 0.5H), 4.00 – 3.96 (m, 0.5H), 3.93 (t,  $J = 8.0$  Hz, 0.5H), 3.86 (t,  $J = 8.0$  Hz, 0.5H), 3.81 (s, 6H), 2.29 – 2.22 (m, 0.5H), 2.15 – 2.08 (m, 0.5H), 2.04 – 1.96 (m, 1H).  $^{13}C$  NMR (125 MHz, Chloroform-*d*)  $\delta$  160.0, 159.9, 159.6, 159.5, 134.8, 134.6, 128.7, 128.4, 128.1, 128.0, 128.0, 126.9, 126.3, 122.5, 122.3, 120.6, 120.3, 114.7, 114.6, 114.1, 62.5, 61.8, 55.3, 55.3, 41.0, 40.2, 33.5, 33.0. HRMS  $m/z$  (ESI) calcd. for  $C_{20}H_{21}N_4O_2$  ( $[M+H]^+$ ) 349.1659, found 349.1658.

**(E)-6-azido-2-(4-bromophenyl)-6-(4-methoxyphenyl)hex-4-enitrile (5c):**

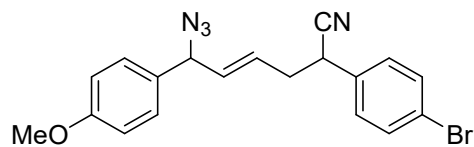

51.5 mg, 65% yield; Light yellow liquid; dr= 7:3;  $^1H$  NMR (500 MHz, Chloroform-*d*)  $\delta$  7.54 (d,  $J = 9.0$  Hz, 2H), 7.33 (d,  $J = 7.0$  Hz, 2H),

7.22 (d,  $J = 8.0$  Hz, 2H), 6.88 (d,  $J = 8.0$  Hz, 2H), 6.67 – 6.58 (m, 1H), 5.97 – 5.89 (m, 1H), 4.32 (t,  $J = 9.0$  Hz, 0.7H), 4.05 – 4.01 (m, 0.7H), 3.98 – 3.92 (m, 0.3H), 3.89 (t,  $J = 8.0$  Hz, 0.3H), 3.82 (s, 3H), 2.31 – 2.24 (m, 0.3H), 2.14 – 2.08 (m, 0.7H), 2.05 – 1.95 (m, 1H).  $^{13}C$  NMR (125 MHz, Chloroform-*d*)  $\delta$  160.0, 135.3, 134.8, 134.1, 132.5, 132.5, 129.2, 128.9, 128.1, 128.1, 127.9, 122.7, 122.5, 122.2, 121.9, 119.5, 114.2, 62.5, 61.7, 55.3, 41.0, 40.1, 33.9, 33.4. HRMS  $m/z$  (ESI) calcd. for  $C_{19}H_{18}BrN_4O$  ( $[M+H]^+$ ) 397.0659, found 397.0655.

**(E)-6-azido-2-(4-bromophenyl)-6-(p-tolyl)hex-4-enitrile (5d):**

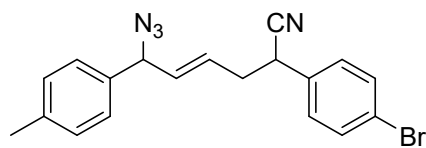

41.0 mg, 54% yield; Light yellow liquid; dr= 11:9;  $^1H$  NMR (500 MHz, Chloroform-*d*)  $\delta$  7.45 (t,  $J = 9.5$  Hz, 2H), 7.23 – 7.19 (m, 2H), 7.17 – 7.12 (m,

2H), 7.07 (d,  $J = 8.0$  Hz, 2H), 6.61 – 6.52 (m, 1H), 5.97 – 5.90 (m, 1H), 4.25 (t,  $J = 10.0$  Hz, 0.55H), 3.96 – 3.93 (m, 0.55H), 3.90 – 3.84 (m, 0.45H), 3.80 (t,  $J = 7.5$

Hz, 0.45H), 2.27 (s, 3H), 2.22 – 2.16 (m, 0.45H), 2.06 – 2.00 (m, 0.55H), 1.97 – 1.87 (m, 1H). <sup>13</sup>C NMR (125 MHz, Chloroform-*d*) δ 138.8, 138.7, 135.6, 135.2, 134.0, 133.5, 132.5, 132.4, 129.4, 129.2, 128.9, 126.7, 126.7, 123.5, 123.2, 122.7, 122.4, 119.8, 119.5, 62.3, 61.6, 40.8, 40.0, 33.9, 33.3, 21.2. HRMS *m/z* (ESI) calcd. for C<sub>19</sub>H<sub>18</sub>BrN<sub>4</sub>([M+H]<sup>+</sup>) 381.0709, found 381.0707.

**(*E*)-1-(3,4-diazidobut-1-en-1-yl)-4-methoxybenzene (4a):**

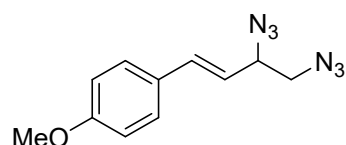

46.4 mg, 95% yield; Colorless liquid; <sup>1</sup>H NMR (500 MHz, Chloroform-*d*) δ 7.35 (d, *J* = 8.5 Hz, 2H), 6.87 (d, *J* = 8.5 Hz, 2H), 6.66 (d, *J* = 15.5 Hz, 1H), 6.00 – 5.95 (m, 1H), 4.25 – 4.20 (m, 1H), 3.81 (s, 3H), 3.37 (t, *J* = 6.0 Hz, 2H). <sup>13</sup>C NMR (125 MHz, Chloroform-*d*) δ 159.9, 135.1, 128.1, 120.5, 114.1, 64.1, 55.3, 54.6. HRMS *m/z* (ESI) calcd. for C<sub>11</sub>H<sub>13</sub>N<sub>6</sub>O ([M+H]<sup>+</sup>) 245.1145, found 245.1145.

**(*E*)-(3,4-diazidobut-1-en-1-yl)benzene (4b):**

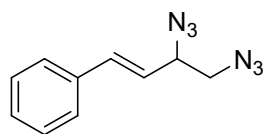

39.0 mg, 91% yield; Colorless liquid; <sup>1</sup>H NMR (500 MHz, Chloroform-*d*) δ 7.34 (d, *J* = 7.0 Hz, 2H), 7.28 (t, *J* = 7.5 Hz, 2H), 7.25 – 7.21 (m, 1H), 6.66 (d, *J* = 16.0 Hz, 1H), 6.08 – 6.02 (m, 1H), 4.22 – 4.16 (m, 1H), 3.36 – 3.28 (m, 2H). <sup>13</sup>C NMR (125 MHz, Chloroform-*d*) δ 135.5, 135.3, 128.7, 128.6, 126.8, 122.9, 63.9, 54.5. HRMS *m/z* (ESI) calcd. for C<sub>10</sub>H<sub>11</sub>N<sub>6</sub>([M+H]<sup>+</sup>) 215.1040, found 215.1041.

**(*E*)-1-(3,4-diazidobut-1-en-1-yl)-4-methylbenzene (4c):**

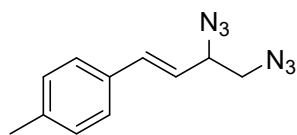

42.4 mg, 93% yield; Colorless liquid; <sup>1</sup>H NMR (500 MHz, Chloroform-*d*) δ 7.22 (d, *J* = 7.5 Hz, 2H), 7.07 (d, *J* = 7.5 Hz, 2H), 6.61 (d, *J* = 16.0 Hz, 1H), 6.01 – 5.96 (m, 1H), 4.18 – 4.13 (m, 1H), 3.29 (t, *J* = 6.0 Hz, 2H), 2.27 (s, 3H). <sup>13</sup>C NMR (125 MHz, Chloroform-*d*) δ 138.6, 135.5, 132.5, 129.4, 126.7, 121.8, 64.0, 54.5, 21.2. HRMS *m/z* (ESI) calcd for C<sub>11</sub>H<sub>13</sub>N<sub>6</sub> ([M+H]<sup>+</sup>) 229.1196, found 229.1197.

**(*E*)-1-bromo-4-(3,4-diazidobut-1-en-1-yl)benzene (4d):**

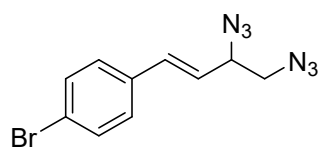

50.2 mg, 86% yield; Colorless liquid; <sup>1</sup>H NMR (500 MHz, Chloroform-*d*) δ 7.38 (d, *J* = 8.5 Hz, 2H), 7.18 (d, *J* = 8.5 Hz, 2H), 6.57 (d, *J* = 16.0 Hz, 1H), 6.05 – 5.99 (m, 1H), 4.18

– 4.12 (m, 1H), 3.34 – 3.26 (m, 2H). <sup>13</sup>C NMR (125 MHz, Chloroform-*d*) δ 134.2 , 134.1 , 131.8 , 128.2 , 123.8 , 122.4 , 63.6 , 54.3. HRMS *m/z* (ESI) calcd. for C<sub>10</sub>H<sub>10</sub>BrN<sub>6</sub>([M+H]<sup>+</sup>)293.0145, found 293.0145.

**(E)-1-chloro-4-(3,4-diazidobut-1-en-1-yl)benzene (4e):**

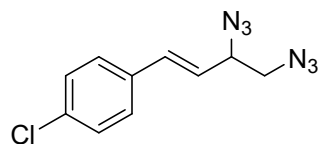

41.2 mg, 83% yield; Colorless liquid; <sup>1</sup>H NMR (500 MHz, Chloroform-*d*) δ 7.36 – 7.29 (m, 4H), 6.68 (d, *J* = 16.0 Hz, 1H), 6.12 – 6.07 (m, 1H), 4.28 – 4.21 (m, 1H), 3.42 – 3.36 (m, 2H). <sup>13</sup>C NMR (126 MHz, Chloroform-*d*) δ 134.3 , 134.1 , 133.8 , 128.9 , 128.0 , 123.7 , 63.7 , 54.4. HRMS *m/z* (ESI) calcd. for C<sub>10</sub>H<sub>10</sub>ClN<sub>6</sub> ([M+H]<sup>+</sup>) 249.0650, found 249.0652.

**(E)-1-(3,4-diazidobut-1-en-1-yl)-4-fluorobenzene (4f):**

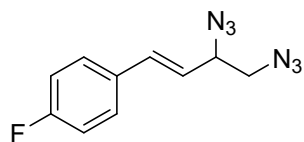

41.8 mg, 90% yield; Colorless liquid; <sup>1</sup>H NMR (500 MHz, Chloroform-*d*) δ 7.31 (t, *J* = 7.0 Hz, 2H), 6.96 (t, *J* = 8.5 Hz, 2H), 6.62 (d, *J* = 15.5 Hz, 1H), 5.97 (m, 1H), 4.19 – 4.15 (m, 1H), 3.36 – 3.28 (m, 2H). <sup>13</sup>C NMR (125 MHz, Chloroform-*d*) δ 163.9, 161.9, 134.3, 131.6, 131.5, 128.5, 128.4, 122.8, 122.7, 115.8, 115.6, 77.3, 63.8, 54.5. <sup>19</sup>F NMR (471 MHz, Chloroform-*d*) δ -112.61. HRMS *m/z* (ESI) calcd. for C<sub>10</sub>H<sub>10</sub>FN<sub>6</sub>([M+H]<sup>+</sup>) 233.0945, found 233.0945.

**(E)-1-chloro-3-(3,4-diazidobut-1-en-1-yl)benzene (4g):**

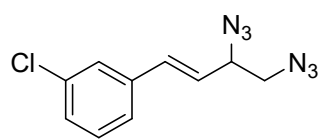

38.7 mg, 78% yield; Colorless liquid; <sup>1</sup>H NMR (500 MHz, Chloroform-*d*) δ 7.39 (s, 1H), 7.27 (s, 3H), 6.67 (d, *J* = 16.0 Hz, 1H), 6.16 – 6.10 (m, 1H), 4.27 – 4.22 (m, 1H), 3.43 – 3.36 (m, 2H). <sup>13</sup>C NMR (125 MHz, Chloroform-*d*) δ 137.2 , 134.7 , 134.0 , 130.0 , 128.5 , 126.6 , 125.0 , 124.6 , 63.6 , 54.4. HRMS *m/z* (ESI) calcd. for C<sub>10</sub>H<sub>10</sub>ClN<sub>6</sub>([M+H]<sup>+</sup>) 249.0650, found 249.0649.

**(E)-1-(3,4-diazidobut-1-en-1-yl)-3-methoxybenzene (4h):**

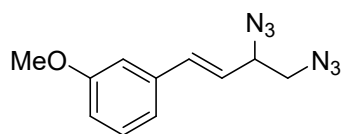

40.0 mg, 82% yield; Colorless liquid; <sup>1</sup>H NMR (500 MHz, Chloroform-*d*) δ 7.19 (t, *J* = 7.5 Hz, 1H), 6.93 (d, *J* = 7.5 Hz, 1H), 6.86 (s, 1H), 6.78 (d, *J* = 8.5 Hz, 1H), 6.62 (d, *J* = 16.0 Hz, 1H), 6.06 – 6.01 (m, 1H), 4.20 – 4.14 (m, 1H), 3.75 (s, 3H), 3.35 – 3.27 (m,

2H).  $^{13}\text{C}$  NMR (125 MHz, Chloroform-*d*)  $\delta$  159.8, 136.8, 135.4, 129.7, 123.3, 119.4, 114.2, 112.1, 63.8, 55.2, 54.5. HRMS  $m/z$  (ESI) calcd. for  $\text{C}_{11}\text{H}_{13}\text{N}_6\text{O}([\text{M}+\text{H}]^+)$  245.1145, found 245.1151.

**(*E*)-1-(3,4-diazidobut-1-en-1-yl)-2-methoxybenzene (4i):**

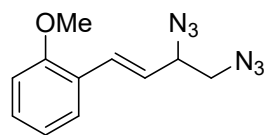

43.5 mg, 89% yield; Colorless liquid;  $^1\text{H}$  NMR (500 MHz, Chloroform-*d*)  $\delta$  7.44 (d,  $J = 9.5$  Hz, 1H), 7.29 – 7.26 (m, 1H), 7.04 (d,  $J = 16.0$  Hz, 1H), 6.94 (t,  $J = 7.5$  Hz, 1H), 6.89 (d,  $J = 8.0$  Hz, 1H), 6.19 – 6.13 (m, 1H), 4.28 – 4.24 (m, 1H), 3.86 (s, 3H), 3.42 – 3.36 (m, 2H).  $^{13}\text{C}$  NMR (125 MHz, Chloroform-*d*)  $\delta$  157.1, 130.7, 129.7, 127.3, 124.3, 123.4, 120.7, 111.0, 64.5, 55.5, 54.7. HRMS  $m/z$  (ESI) calcd. for  $\text{C}_{11}\text{H}_{13}\text{N}_6\text{O}([\text{M}+\text{H}]^+)$  245.1145, found 245.1145.

**(*E*)-1-chloro-3-(3,4-diazidobut-1-en-1-yl)benzene (4j):**

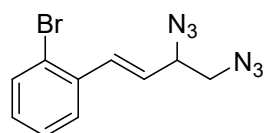

53.7 mg, 92% yield; Colorless liquid;  $^1\text{H}$  NMR (500 MHz, Chloroform-*d*)  $\delta$  7.57 (d,  $J = 8.0$  Hz, 1H), 7.52 (d,  $J = 8.0$  Hz, 1H), 7.29 (t,  $J = 7.5$  Hz, 1H), 7.16 (t,  $J = 8.0$  Hz, 1H), 7.07 (d,  $J = 15.5$  Hz, 1H), 5.10 – 5.04 (m, 1H), 4.33 – 4.28 (m, 1H), 3.46 – 3.37 (m, 2H).  $^{13}\text{C}$  NMR (125 MHz, Chloroform-*d*)  $\delta$  135.42, 134.30, 133.04, 129.79, 127.61, 127.27, 125.95, 123.85, 63.53, 54.40. HRMS  $m/z$  (ESI) calcd. for  $\text{C}_{10}\text{H}_{10}\text{BrN}_6([\text{M}+\text{H}]^+)$  293.0145, found 293.0151.

**(*E*)-1-chloro-2-(3,4-diazidobut-1-en-1-yl)benzene (4k):**

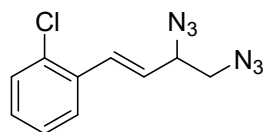

42.7 mg, 86% yield; Colorless liquid;  $^1\text{H}$  NMR (500 MHz, Chloroform-*d*)  $\delta$  7.48 – 7.44 (m, 1H), 7.33 – 7.27 (m, 1H), 7.18 – 7.15 (m, 2H), 7.04 (d,  $J = 16.0$  Hz, 1H), 6.01 – 6.01 (m, 1H), 4.26 – 4.20 (m, 1H), 3.39 – 3.30 (m, 2H).  $^{13}\text{C}$  NMR (125 MHz, Chloroform-*d*)  $\delta$  133.6, 133.4, 131.7, 129.8, 129.6, 127.1, 127.0, 125.8, 63.7, 54.4. HRMS  $m/z$  (ESI) calcd for  $\text{C}_{10}\text{H}_{10}\text{ClN}_6([\text{M}+\text{H}]^+)$  249.0650, found 249.0649.

**(*E*)-4-(3,4-diazidobut-1-en-1-yl)-1,2-dimethoxybenzene (4l):**

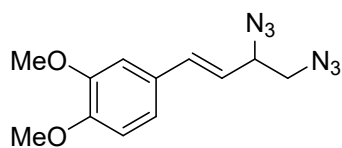

47.7 mg, 87% yield; Light yellow solid; mp 74.5-79.2 °C;  $^1\text{H}$  NMR (500 MHz, Chloroform-*d*)  $\delta$  6.87 (t,  $J = 4.0$  Hz, 2H), 6.74 (d,  $J = 6.5$  Hz, 1H), 6.57 (d,  $J = 15.5$  Hz, 1H),

5.93 – 5.87 (m, 1H), 4.17 – 4.12 (m, 1H), 3.82 (s, 3H), 3.79 (s, 3H), 3.33 – 3.24 (m, 2H).<sup>13</sup>C NMR (125 MHz, Chloroform-*d*)  $\delta$  149.5, 149.0, 135.1, 128.2, 120.6, 120.2, 110.9, 108.8, 63.9, 55.7, 55.7, 54.4. HRMS *m/z* (ESI) calcd. for C<sub>12</sub>H<sub>15</sub>N<sub>6</sub>O<sub>2</sub>([M+H]<sup>+</sup>) 275.1251, found 275.1253.

**(*E*)-2-(3,4-diazidobut-1-en-1-yl)naphthalene (4m):**

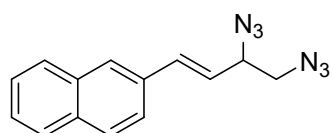

47.0 mg, 89% yield; white solid; mp 75.2-89.6 °C; <sup>1</sup>H NMR (500 MHz, Chloroform-*d*)  $\delta$  7.70 (d, *J* = 7.0 Hz, 3H), 7.66 (s, 1H), 7.48 (d, *J* = 8.5 Hz, 1H), 7.38 (d, *J* = 4.0 Hz, 2H), 6.76 (d, *J* = 15.5 Hz, 1H), 6.15 – 6.09 (m, 1H), 4.20 – 4.15 (m, 1H), 3.33 – 3.26 (m, 2H).<sup>13</sup>C NMR (125 MHz, Chloroform-*d*)  $\delta$  135.5, 133.4, 132.7, 128.4, 128.1, 127.7, 127.3, 126.5, 126.4, 123.3, 123.2, 63.9, 54.5. HRMS *m/z* (ESI) calcd. for C<sub>14</sub>H<sub>13</sub>N<sub>6</sub>([M+H]<sup>+</sup>) 265.1196, found 265.1185.

**(*E*)-9-(3,4-diazidobut-1-en-1-yl)anthracene (4n):**

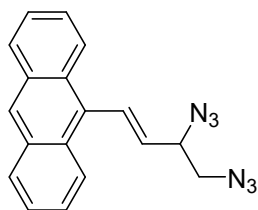

54.0 mg, 86% yield; Reddish liquid; <sup>1</sup>H NMR (500 MHz, Chloroform-*d*)  $\delta$  8.30 (s, 1H), 8.11 (d, *J* = 8.0 Hz, 2H), 7.92 (d, *J* = 8.0 Hz, 2H), 7.46 – 7.39 (m, 4H), 7.32 (d, *J* = 16.0 Hz, 1H), 5.87 – 5.82 (m, 1H), 4.43 – 4.38 (m, 1H), 3.44 (t, *J* = 4.5 Hz, 2H).<sup>13</sup>C NMR (125 MHz, Chloroform-*d*)  $\delta$  131.8, 131.6, 131.2, 130.5, 129.1, 128.7, 127.1, 125.8, 125.3, 125.1, 64.0, 54.4. HRMS *m/z* (ESI) calcd. for C<sub>18</sub>H<sub>15</sub>N<sub>6</sub>([M+H]<sup>+</sup>) 315.1353, found 315.1359.

**(*E*)-2-(3,4-diazidobut-1-en-1-yl)furan (4o):**

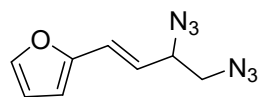

34.7 mg, 85% yield; Grey liquid; <sup>1</sup>H NMR (500 MHz, Chloroform-*d*)  $\delta$  7.39 (s, 1H), 6.53 (d, *J* = 15.5 Hz, 1H), 6.40 (s, 1H), 6.35 (s, 1H), 6.08 – 6.02 (m, 1H), 4.24 – 4.19 (m, 1H), 3.41 – 3.36 (m, 2H).<sup>13</sup>C NMR (125 MHz, Chloroform-*d*)  $\delta$  151.0, 142.8, 123.2, 121.3, 111.5, 110.1, 63.6, 54.5. HRMS *m/z* (ESI) calcd. for C<sub>8</sub>H<sub>9</sub>N<sub>6</sub>O([M+H]<sup>+</sup>) 205.0832, found 205.0835.

**(*E*)-(3,4-diazido-2-methylbut-1-en-1-yl)benzene (4p):**

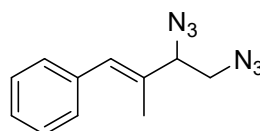

42.0 mg, 92% yield; Colorless liquid; <sup>1</sup>H NMR (500 MHz, Chloroform-*d*)  $\delta$  7.36 (t, *J* = 7.5 Hz, 2H), 7.32 – 7.26 (m, 3H), 6.63 (s, 1H), 4.25 – 4.18 (m, 1H), 3.41 – 3.39 (m, 2H), 1.90 (d,

$J = 1.5$  Hz, 3H).  $^{13}\text{C}$  NMR (125 MHz, Chloroform-*d*)  $\delta$  136.2 , 132.4 , 131.0 , 129.0 , 128.3 , 127.3 , 69.5 , 53.0 , 13.9. HRMS  $m/z$  (ESI) calcd. for  $\text{C}_{11}\text{H}_{13}\text{N}_6$  ( $[\text{M}+\text{H}]^+$ ) 229.1196, found 229.1197.

**(E)-(2-(1,2-diazidoethyl)hept-1-en-1-yl)benzene (4q):**

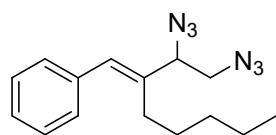

50.6 mg, 89% yield; Colorless liquid;  $^1\text{H}$  NMR (500 MHz, Chloroform-*d*)  $\delta$  7.28 (t,  $J = 8.0$  Hz, 2H), 7.19 (t,  $J = 8.0$  Hz, 3H), 6.54 (s, 1H), 4.11 (t,  $J = 6.5$  Hz, 1H), 3.33 (d,  $J = 6.5$  Hz, 2H), 2.27 – 2.06 (m, 2H), 1.44 – 1.41 (m, 2H), 1.23 – 1.20 (m, 4H), 0.80 (s, 3H).  $^{13}\text{C}$  NMR (125 MHz, Chloroform-*d*)  $\delta$  137.5, 136.4, 130.3, 128.6, 128.3, 127.2, 67.4, 53.9, 31.9, 29.2, 28.3, 22.2, 13.9. HRMS  $m/z$  (ESI) calcd. for  $\text{C}_{15}\text{H}_{21}\text{N}_6$  ( $[\text{M}+\text{H}]^+$ ) 285.1822, found 285.1826.

**(E)-(2-(1,2-diazidoethyl)oct-1-en-1-yl)benzene (4r):**

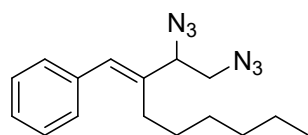

53.6 mg, 90% yield; Colorless liquid;  $^1\text{H}$  NMR (500 MHz, Chloroform-*d*)  $\delta$  7.35 (t,  $J = 7.5$  Hz, 2H), 7.26 (t,  $J = 7.5$  Hz, 3H), 6.62 (s, 1H), 4.19 (t,  $J = 6.5$  Hz, 1H), 3.41 (d,  $J = 6.5$  Hz, 2H), 2.35 – 2.14 (m, 2H), 1.53 – 1.45 (m, 2H), 1.32 – 1.23 (m, 6H), 0.87 (s, 3H).  $^{13}\text{C}$  NMR (125 MHz, Chloroform-*d*)  $\delta$  137.5, 136.4, 130.4, 128.7, 128.7, 128.3, 127.2, 67.4, 53.9, 31.4, 29.4, 29.2, 28.6, 22.5, 14.0. HRMS  $m/z$  (ESI) calcd. for  $\text{C}_{16}\text{H}_{23}\text{N}_6$  ( $[\text{M}+\text{H}]^+$ ) 299.1979, found 299.1984.

**(3,4-diazidobut-1-ene-1,1-diyl)dibenzene (4s):**

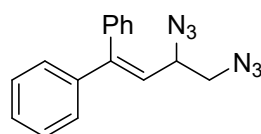

52.8 mg, 91% yield; Colorless liquid;  $^1\text{H}$  NMR (500 MHz, Chloroform-*d*)  $\delta$  7.32 (m, 3H), 7.21 (m, 5H), 7.11 (d,  $J = 7.5$  Hz, 2H), 5.97 (d,  $J = 10.0$  Hz, 1H), 4.17 – 4.12 (m, 1H), 3.26 (d,  $J = 6.0$  Hz, 2H).  $^{13}\text{C}$  NMR (125 MHz, Chloroform-*d*)  $\delta$  148.77, 140.41, 138.13, 129.48, 128.68, 128.41, 128.33, 128.03, 127.48, 121.76, 60.11, 54.56. HRMS  $m/z$  (ESI) calcd. for  $\text{C}_{16}\text{H}_{15}\text{N}_6$  ( $[\text{M}+\text{H}]^+$ ) 291.1353, found 291.1346.

**(E)-1-(3,4-diazido-1-cyclopropylbut-1-en-1-yl)-4-methoxybenzene (4t):**

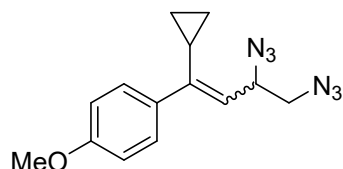

46.0 mg, 81% yield; Colorless liquid;  $E/Z=6:1$ ;  $^1\text{H}$  NMR (500 MHz, Chloroform-*d*)  $\delta$  7.18 (d,  $J = 5.5$  Hz,



0.3H), 6.94 (d,  $J = 7.5$  Hz, 1.7H), 6.82 (d,  $J = 7.5$  Hz, 1.7H), 6.78 (d,  $J = 10.0$  Hz, 0.3H), 5.47 (d,  $J = 9.5$  Hz, 0.15H), 5.36 (d,  $J = 9.5$  Hz, 0.85H), 4.84 – 4.79 (m, 0.15H), 3.97 – 3.92 (m, 0.85H), 3.75 (s, 3.51H), 3.31 (t,  $J = 4.0$  Hz, 0.3H), 3.13 (t,  $J = 3.5$  Hz, 1.7H), 1.73 – 1.69 (m, 0.15H), 1.62 – 1.55 (m, 0.85H), 0.85 – 0.80 (m, 0.3H), 0.69 – 0.62 (m, 1.7H), 0.44 – 0.33 (m, 2H).  $^{13}\text{C}$  NMR (125 MHz, Chloroform-*d*)  $\delta$  159.0, 151.2, 129.8, 129.4, 128.8, 122.7, 118.7, 113.8, 113.3, 59.8, 58.9, 55.2, 54.6, 18.7, 12.0, 6.8, 6.0, 5.5. HRMS  $m/z$  (ESI) calcd. for  $\text{C}_{14}\text{H}_{17}\text{N}_6\text{O}([\text{M}+\text{H}]^+)$  285.1458, found 285.1455.

**1-(1,2-diazidoethyl)-4-methoxybenzene (4u):**

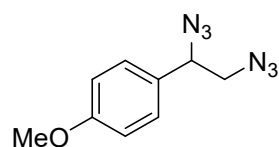

37.5 mg, 86% yield; Colorless liquid;  $^1\text{H}$  NMR (500 MHz, Chloroform-*d*)  $\delta$  7.18 (d,  $J = 8.5$  Hz, 2H), 6.86 (d,  $J = 8.5$  Hz, 2H), 4.56 – 4.53 (m, 1H), 3.74 (s, 3H), 3.43 – 3.31 (m, 2H).  $^{13}\text{C}$  NMR (125 MHz, Chloroform-*d*)  $\delta$  160.0, 129.80, 128.2, 114.4, 65.0, 55.8, 55.3. HRMS  $m/z$  (ESI) calcd. for  $\text{C}_9\text{H}_{11}\text{N}_6\text{O}([\text{M}+\text{H}]^+)$  219.0989, found 219.0989.

**1-(1,2-diazidoethyl)-3-methoxybenzene (4v):**

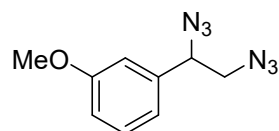

27.5 mg, 63% yield; Colorless liquid;  $^1\text{H}$  NMR (500 MHz, Chloroform-*d*)  $\delta$  7.25 (t,  $J = 8.0$  Hz, 1H), 6.84 (d,  $J = 8.0$  Hz, 2H), 6.80 (s, 1H), 4.59 – 4.54 (m, 1H), 3.76 (s, 3H), 3.45 – 3.34 (m, 2H).  $^{13}\text{C}$  NMR (125 MHz, Chloroform-*d*)  $\delta$  160.1, 137.8, 130.2, 119.1, 114.3, 112.6, 65.5, 55.9, 55.3. HRMS  $m/z$  (ESI) calcd. for  $\text{C}_9\text{H}_{11}\text{N}_6\text{O}([\text{M}+\text{H}]^+)$  219.0989, found 219.0981.

**1-(1,2-diazidoethyl)-4-phenoxybenzene (4w):**

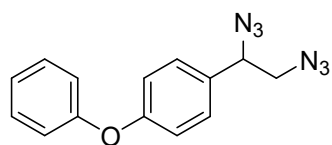

45.9 mg, 82% yield; Colorless liquid;  $^1\text{H}$  NMR (500 MHz, Chloroform-*d*)  $\delta$  7.28 (t,  $J = 8.0$  Hz, 2H), 7.21 (d,  $J = 8.0$  Hz, 2H), 7.07 (t,  $J = 7.5$  Hz, 1H), 6.95 (d,  $J = 7.0$  Hz, 4H), 4.59 – 4.56 (m, 1H), 3.45 – 3.34 (m, 2H).  $^{13}\text{C}$  NMR (125 MHz, Chloroform-*d*)  $\delta$  158.1, 156.5, 130.8, 129.9, 128.4, 123.8, 119.4, 118.9, 65.0, 55.9. HRMS  $m/z$  (ESI) calcd. for  $\text{C}_{14}\text{H}_{13}\text{N}_6\text{O}([\text{M}+\text{H}]^+)$  281.1145, found 281.1155.

**2-((2,2,6,6-tetramethylpiperidin-1-yl)oxy)acetonitrile:**

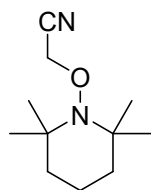

Colorless liquid;  $^1\text{H}$  NMR (500 MHz,  $\text{CDCl}_3$ )  $\delta$  4.45 (s, 2H), 1.51 – 1.45 (m, m 1H), 1.38 (d,  $J = 16.5$  Hz, 4H), 1.28 – 1.24 (m, 1H), 1.13 (s, 6H), 1.03 (s, 6H).  $^{13}\text{C}$  NMR (125 MHz,  $\text{CDCl}_3$ )  $\delta$  115.9, 62.5, 60.2, 39.5, 32.9, 19.8, 16.8. LRMS (EI, 70eV)  $m/z$  (%): 196 (4), 181 (75), 156 (100), 109 (52); HRMS  $m/z$  (ESI) calcd for  $\text{C}_{11}\text{H}_{21}\text{N}_2\text{O}([\text{M}+\text{H}]^+)$  197.1648, found 197.1645.

**1-(azidooxy)-2,2,6,6-tetramethylpiperidine:**

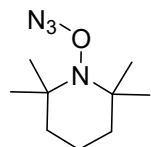

Colorless liquid; LRMS (EI, 70eV)  $m/z$  (%): 198 (5), 142 (84), 133 (100), 87 (73); HRMS  $m/z$  (ESI) calcd for  $\text{C}_9\text{H}_{19}\text{N}_4\text{O}([\text{M}+\text{H}]^+)$  199.1553, found 199.1559.

## (C) Spectra

### (E)-4-azido-6-(4-methoxyphenyl)hex-5-enitrile (3a):

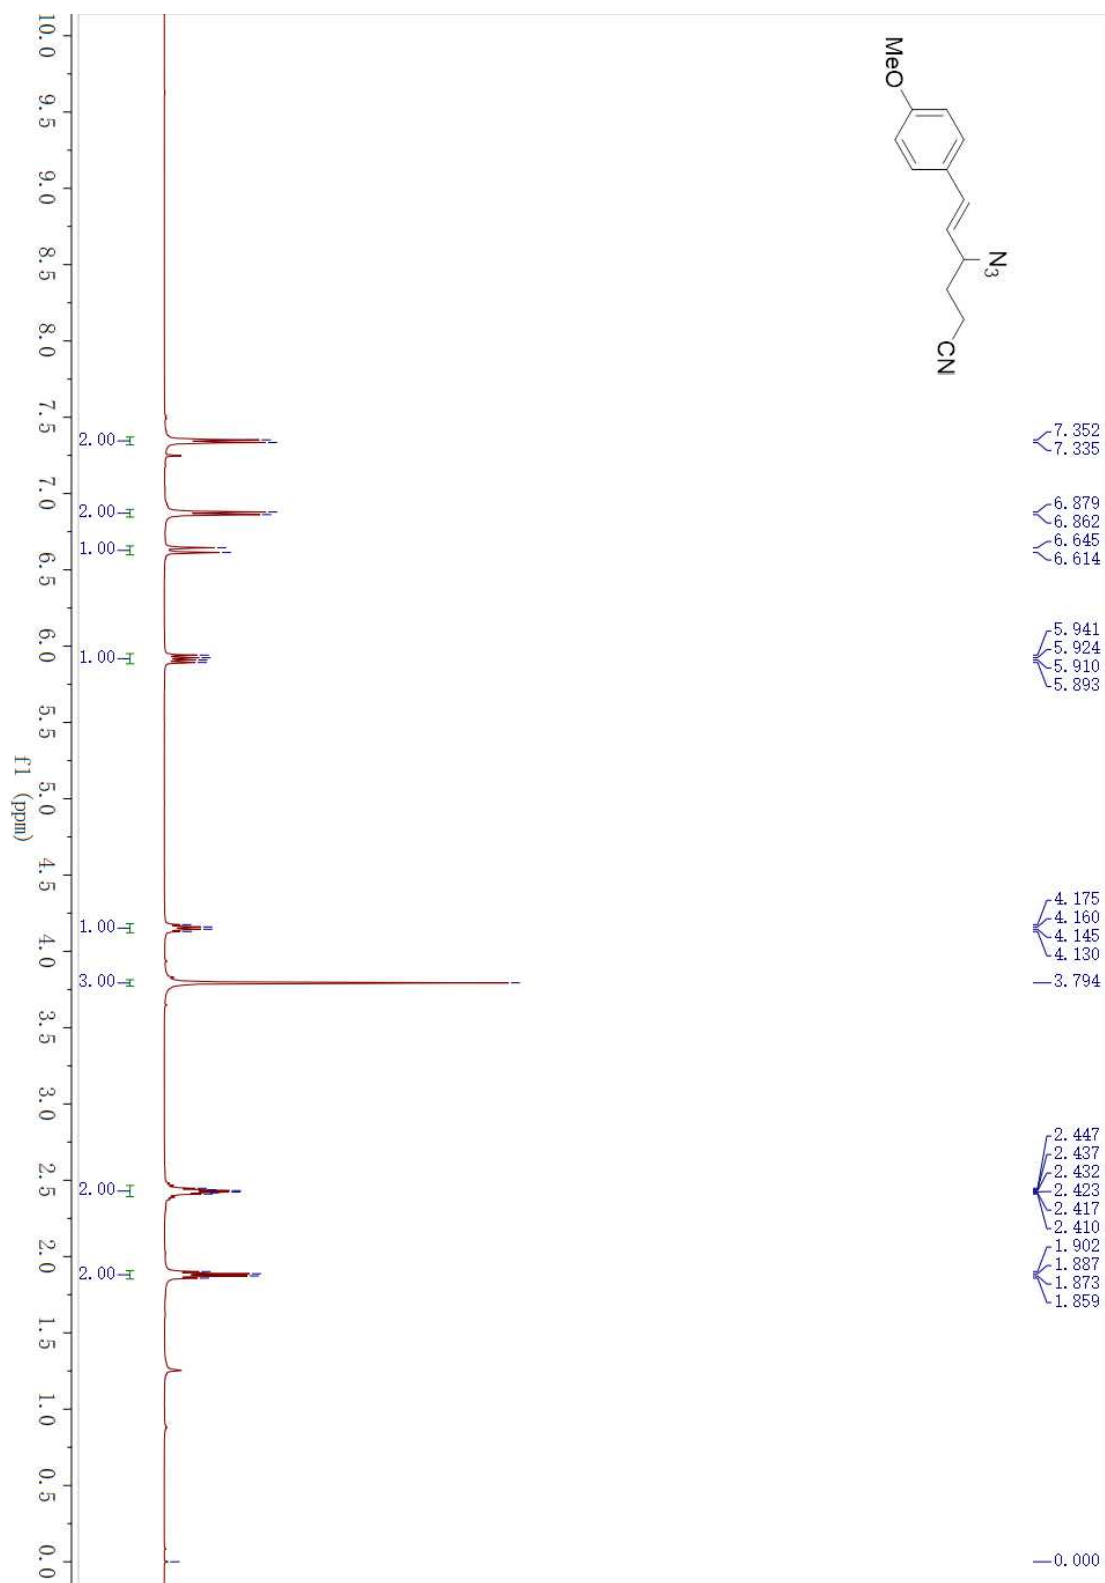

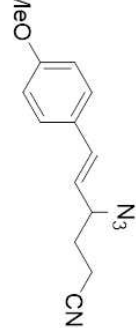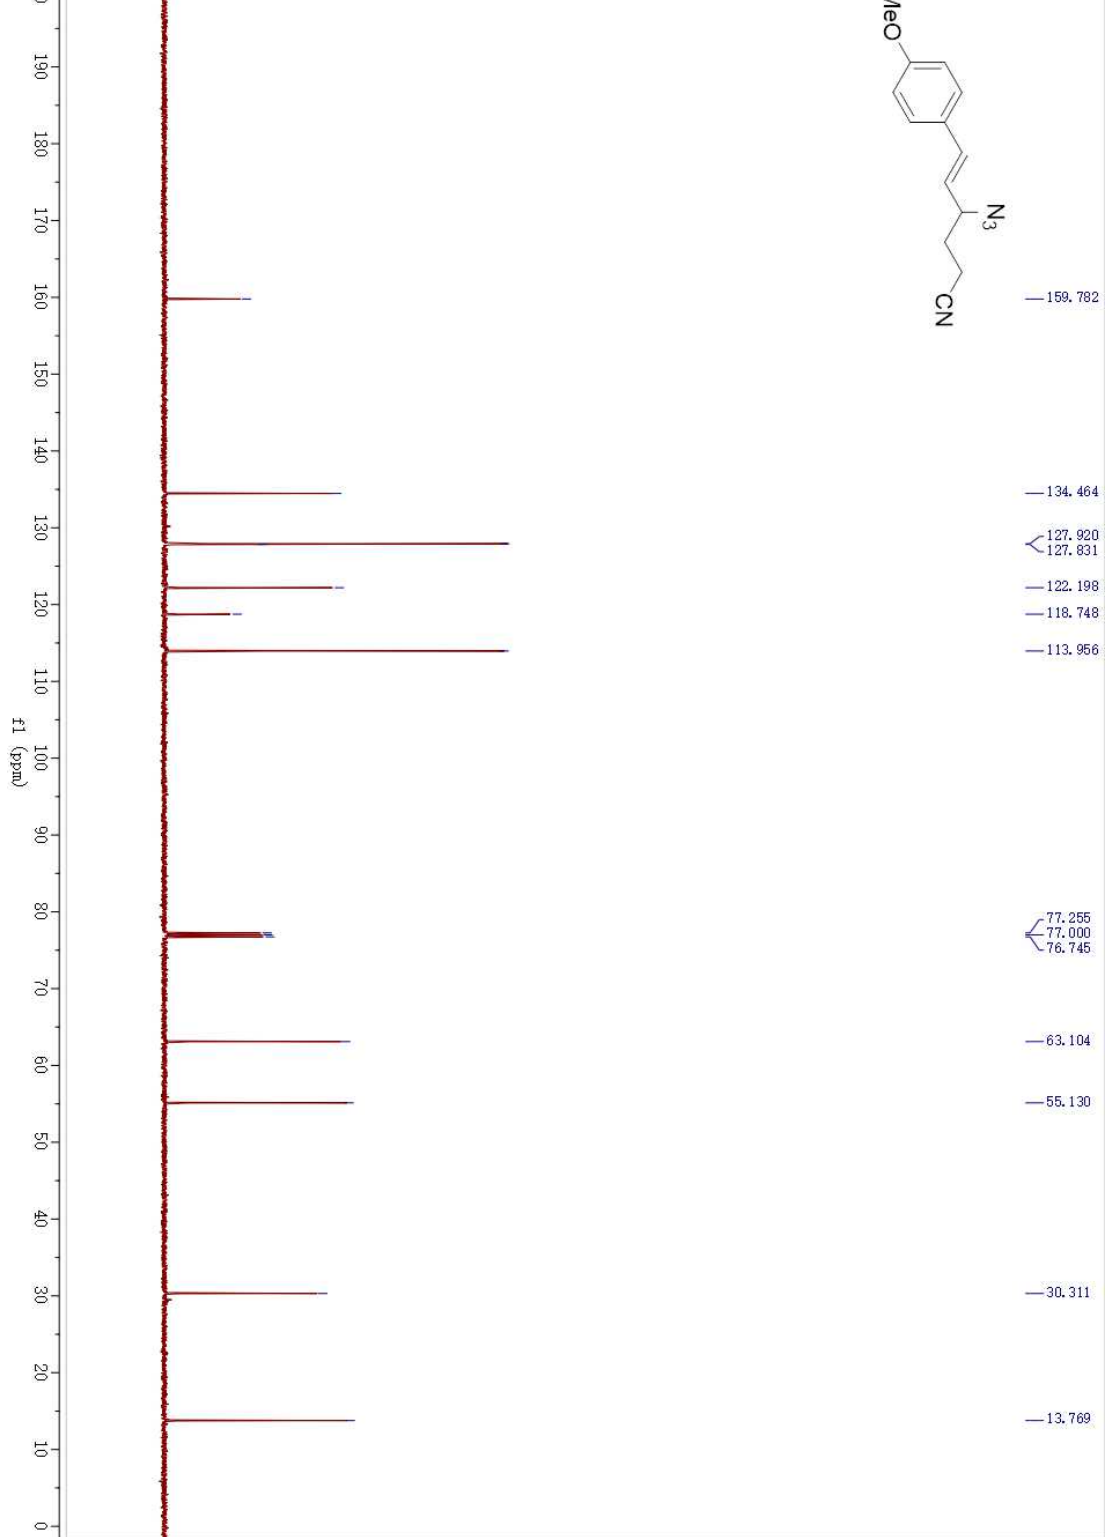

**(E)-1-(hept-1-en-1-yl)-4-phenylbut-3-yn-1-amine**

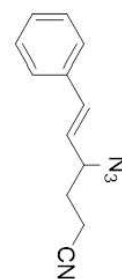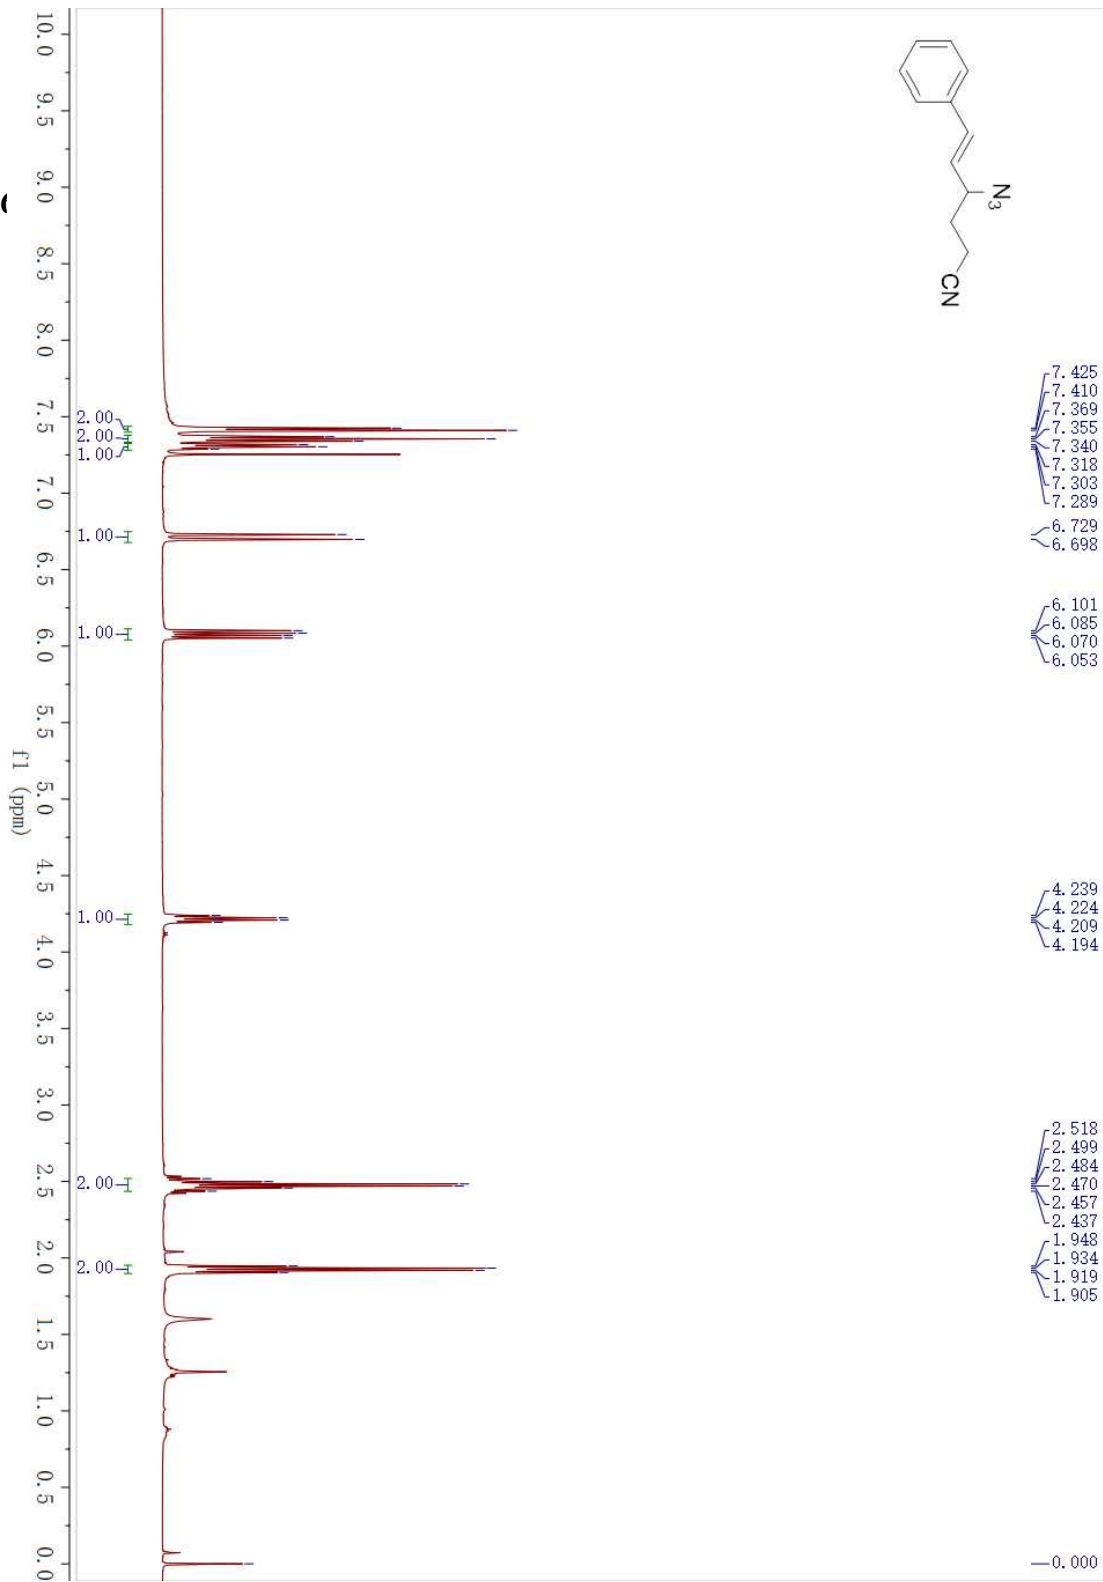

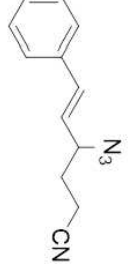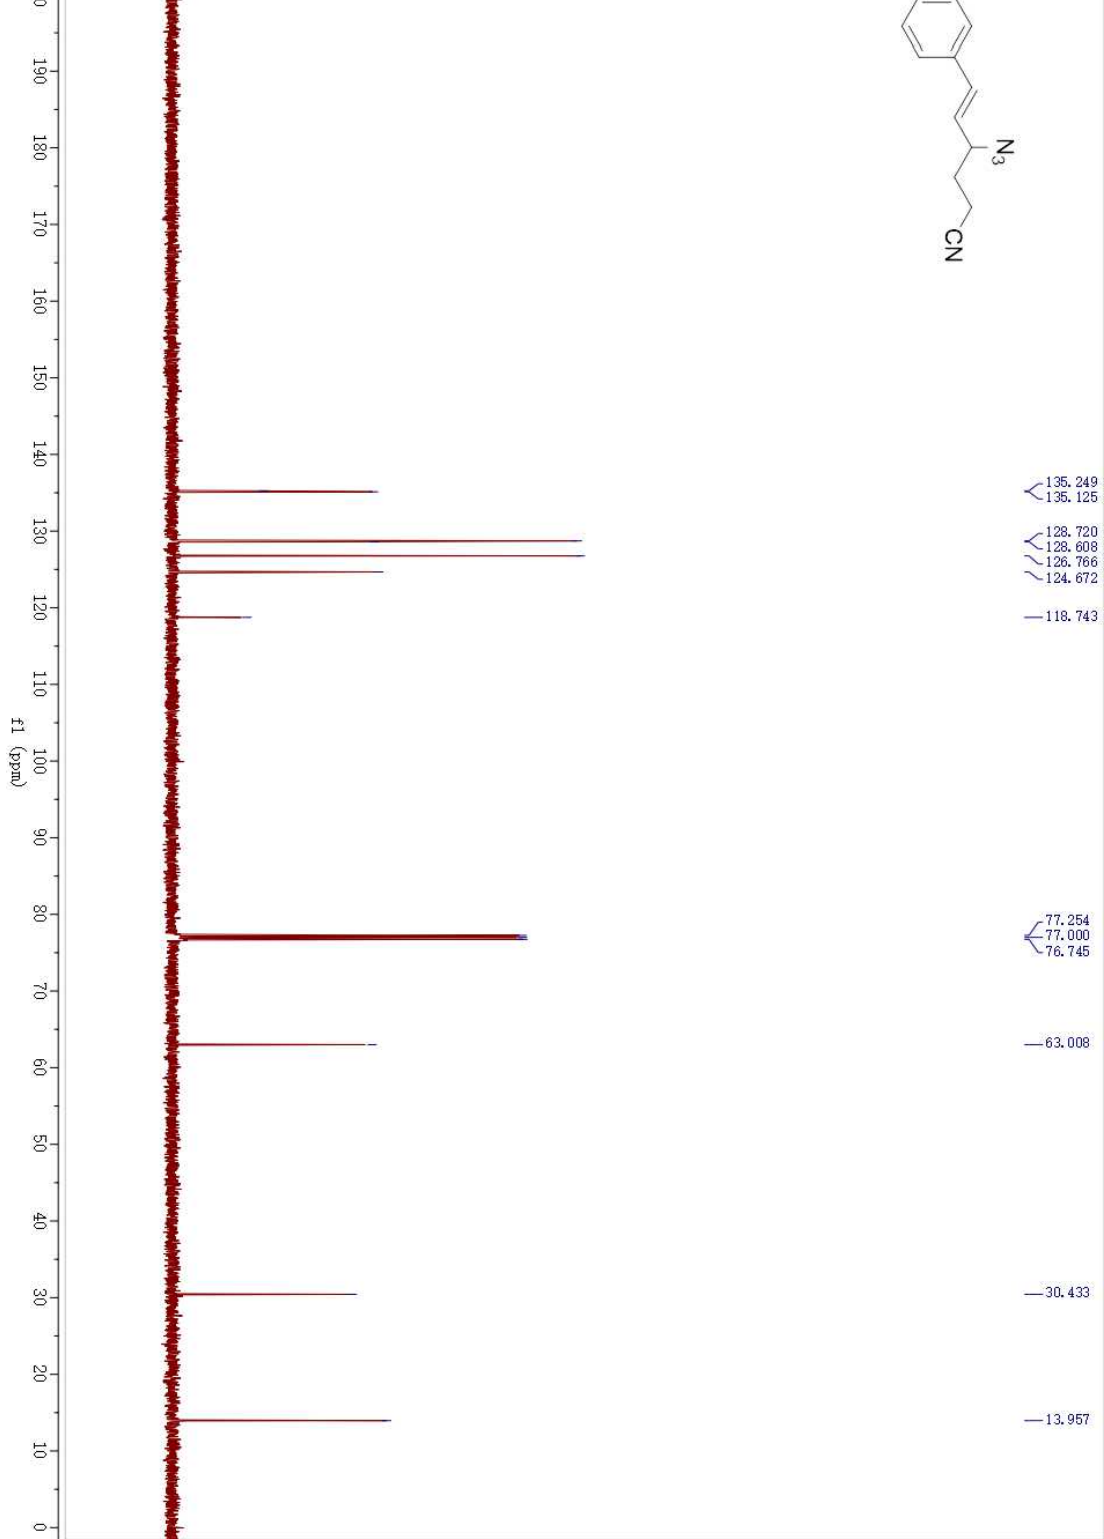

**(E)-4-azido-6-(p-t**

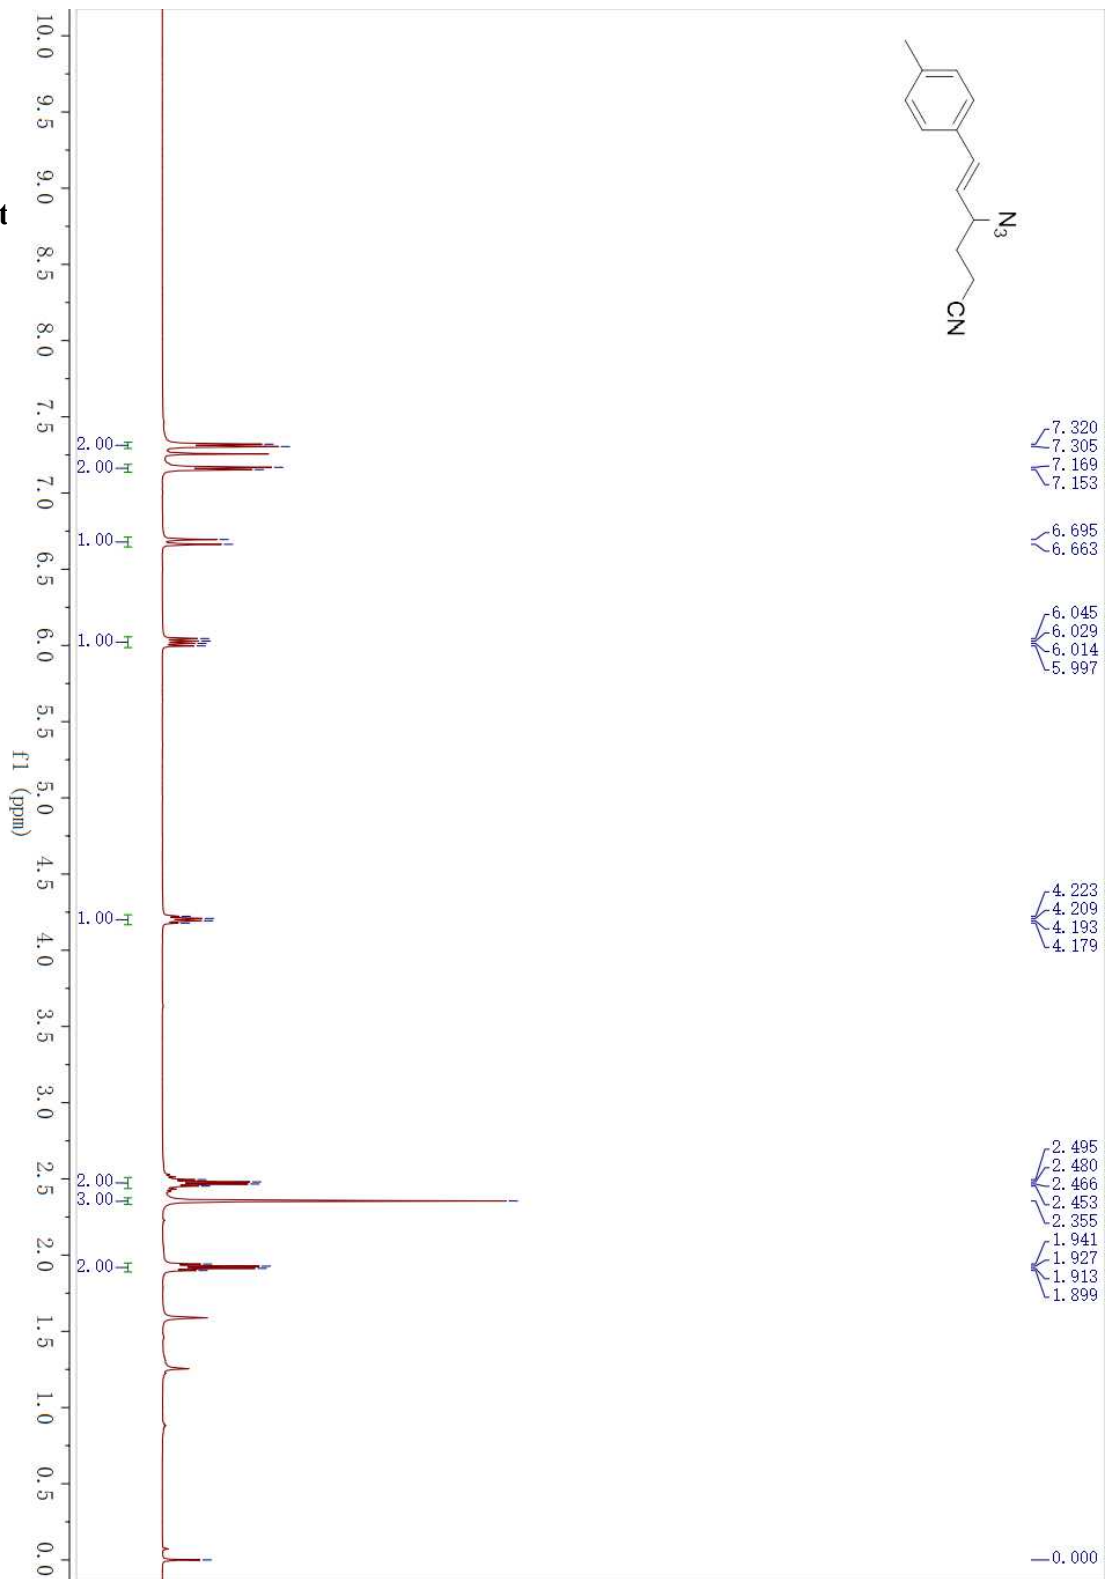

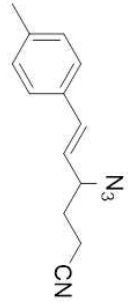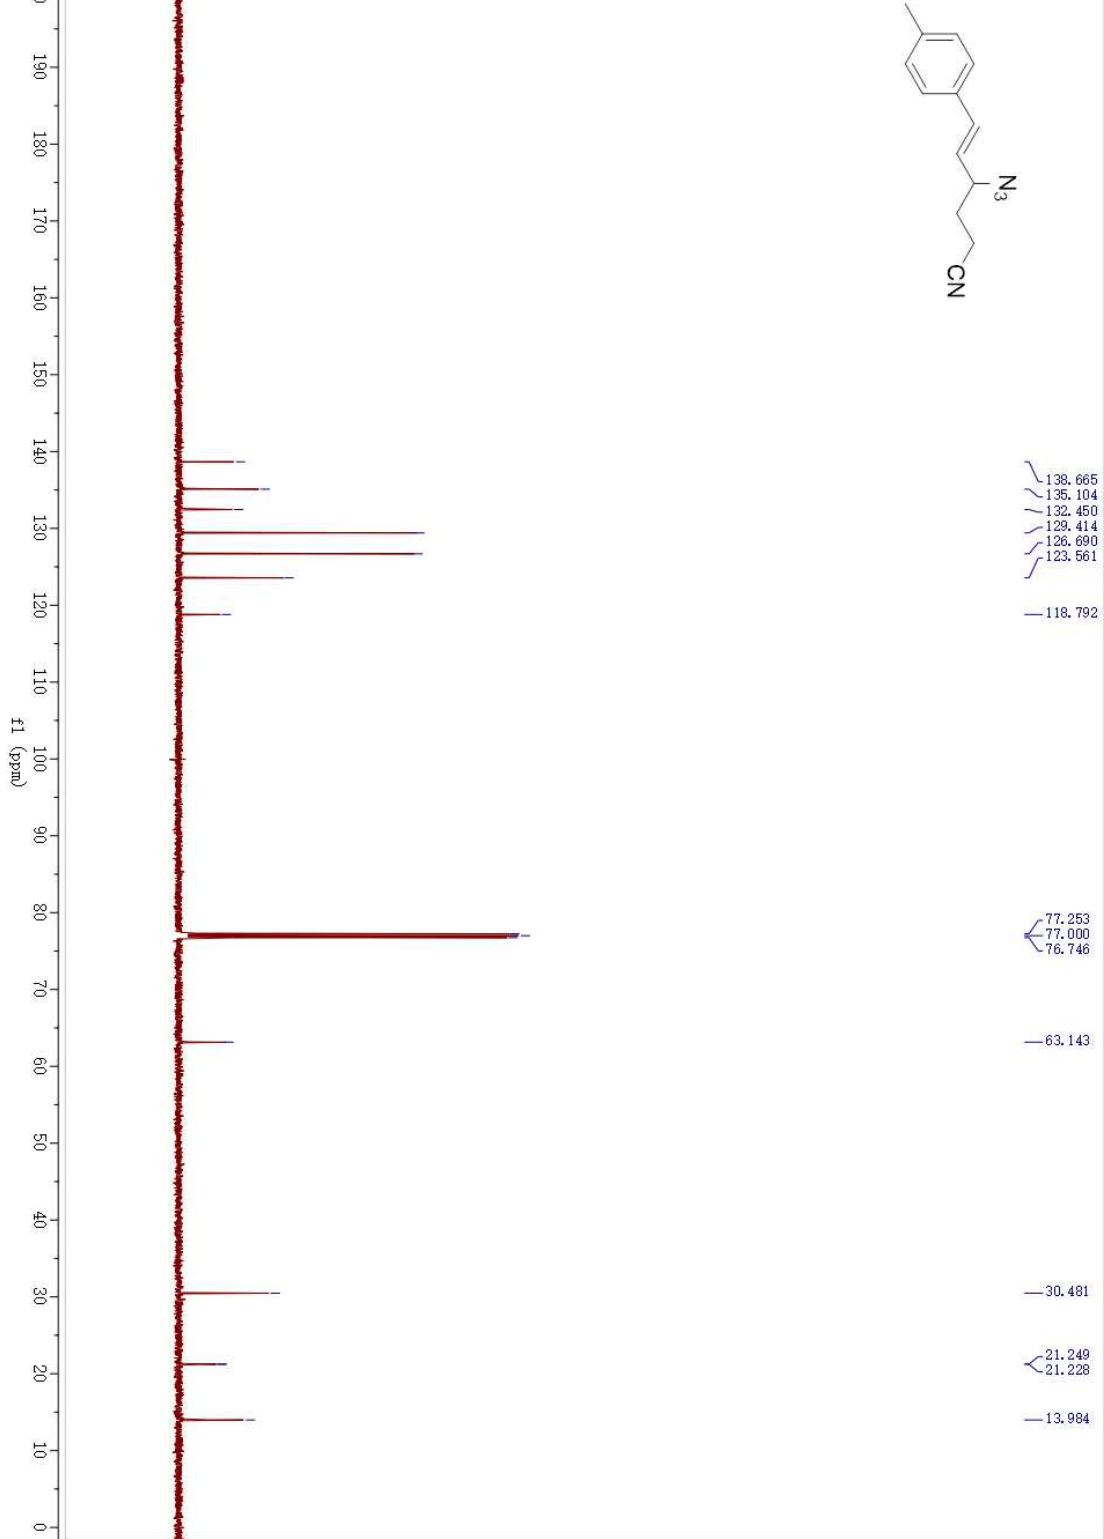



**(E)-4-azido-6-(4-t**

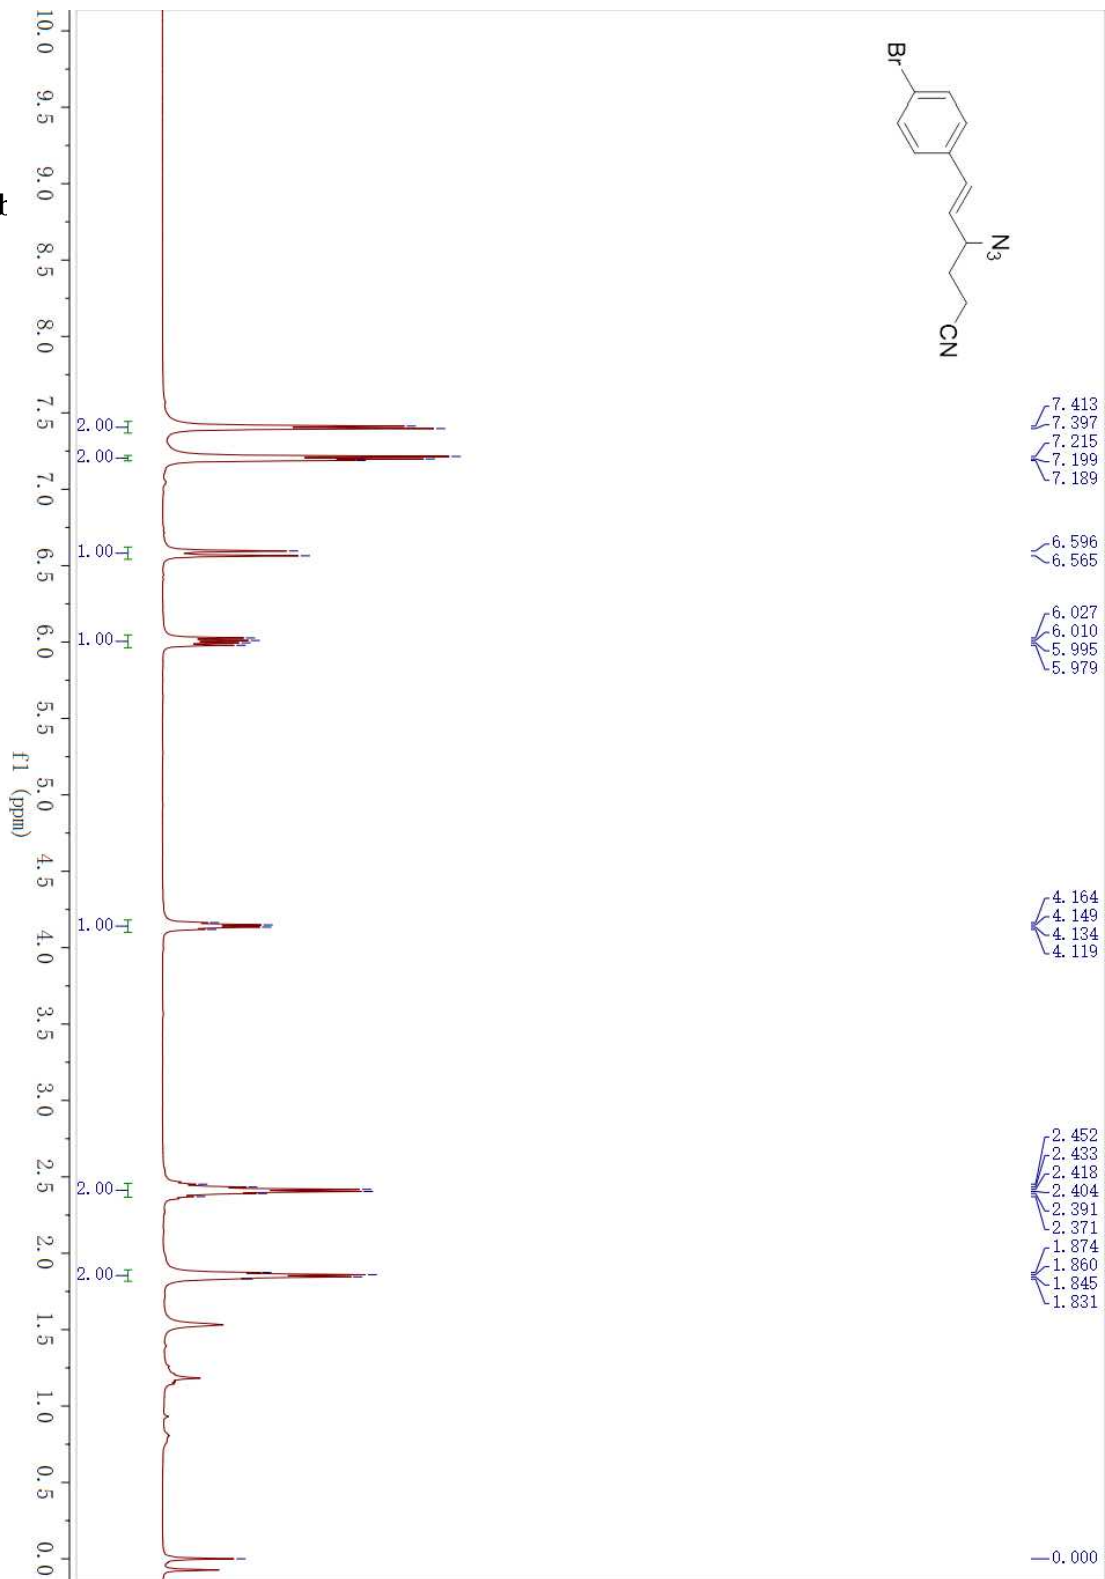

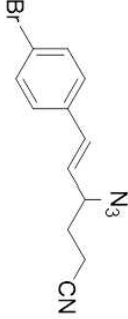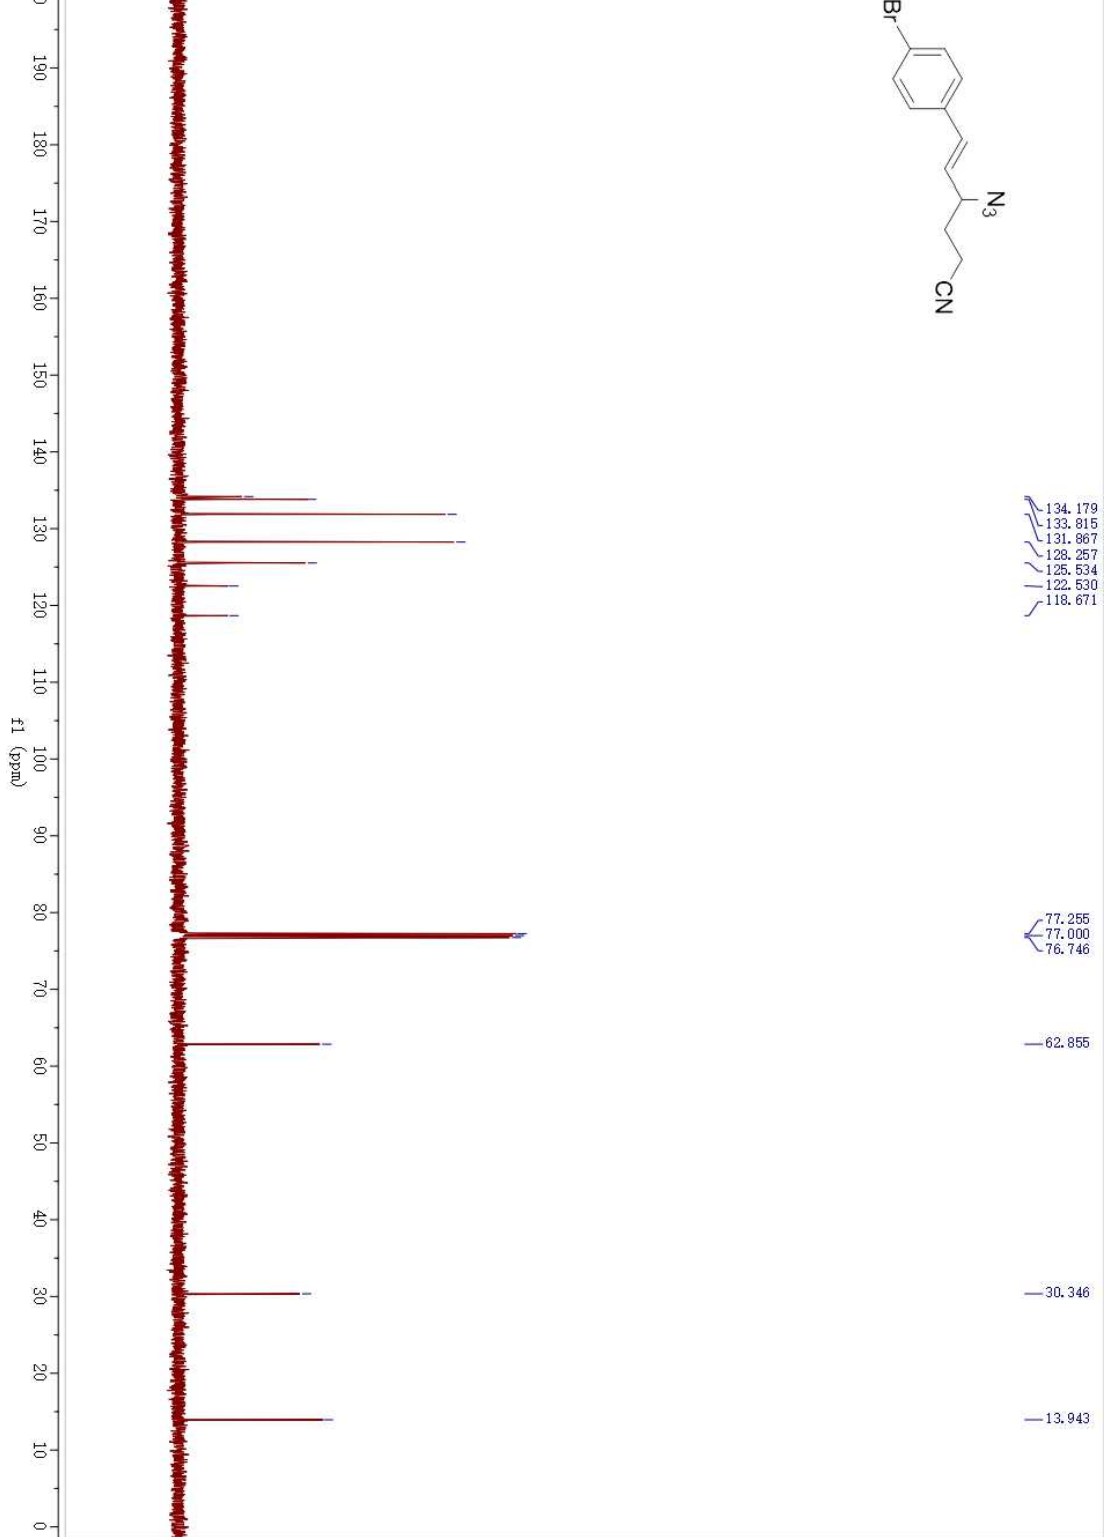

**(E)-4-azido-6-(4-c**

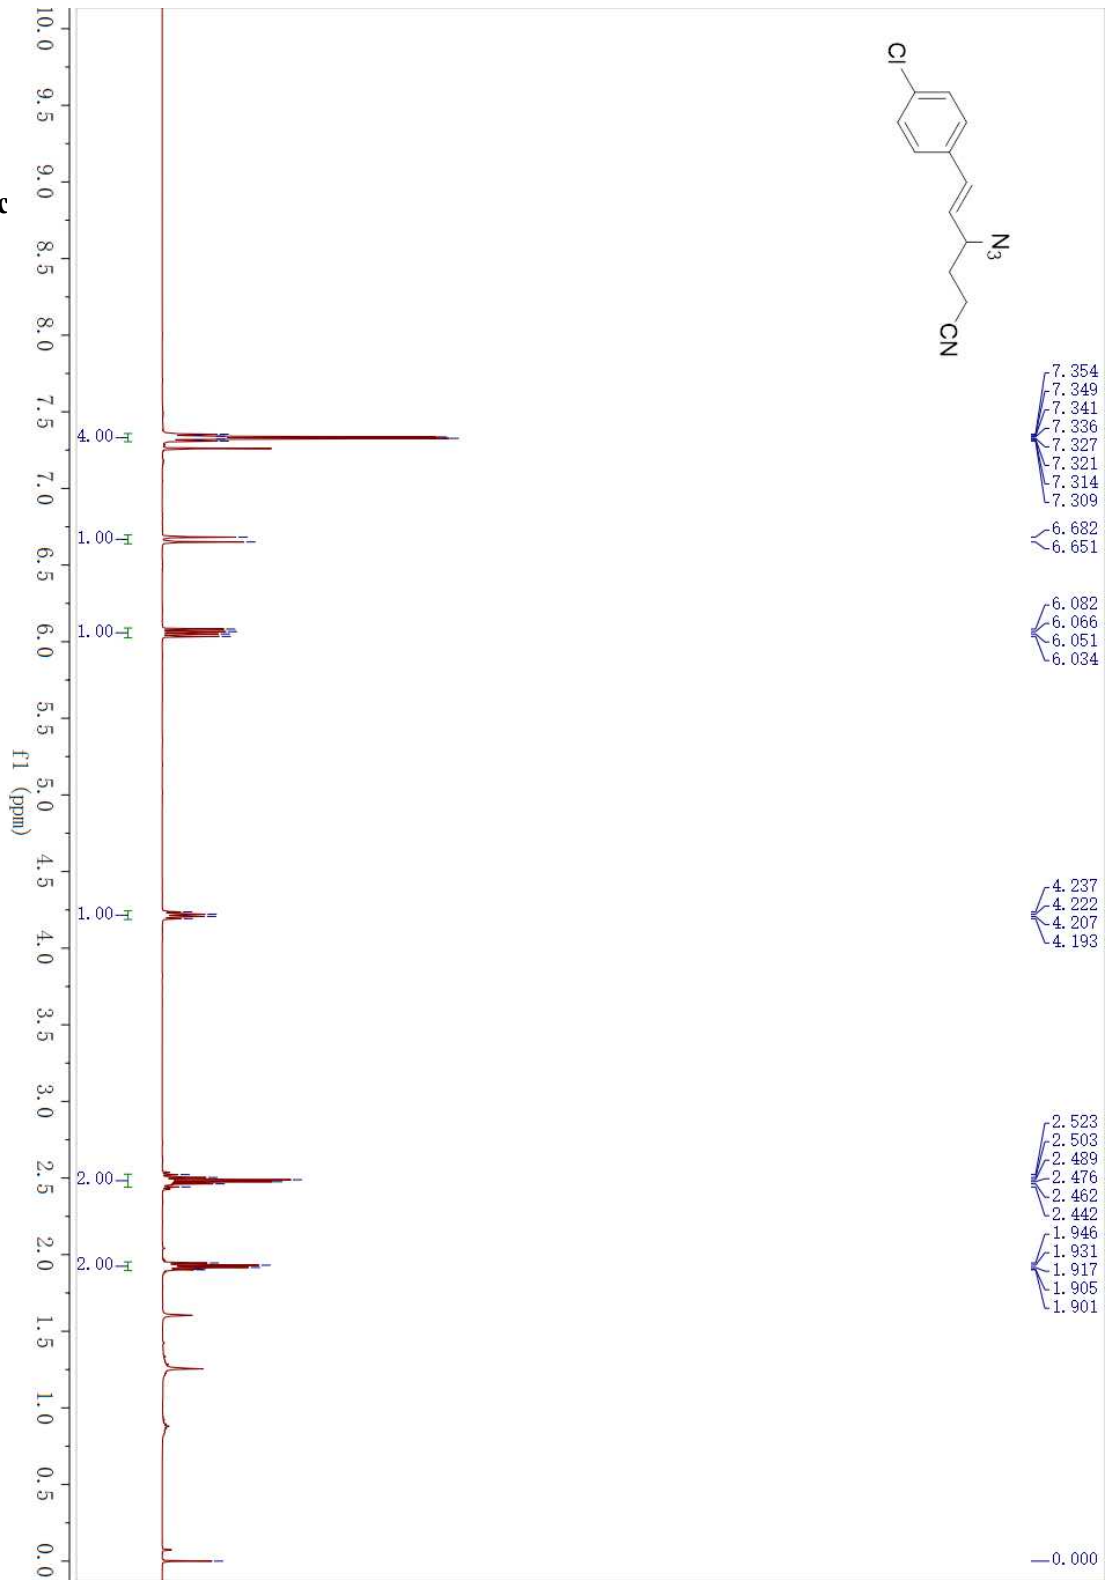

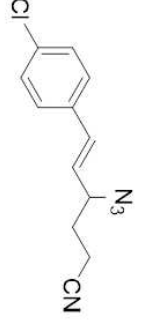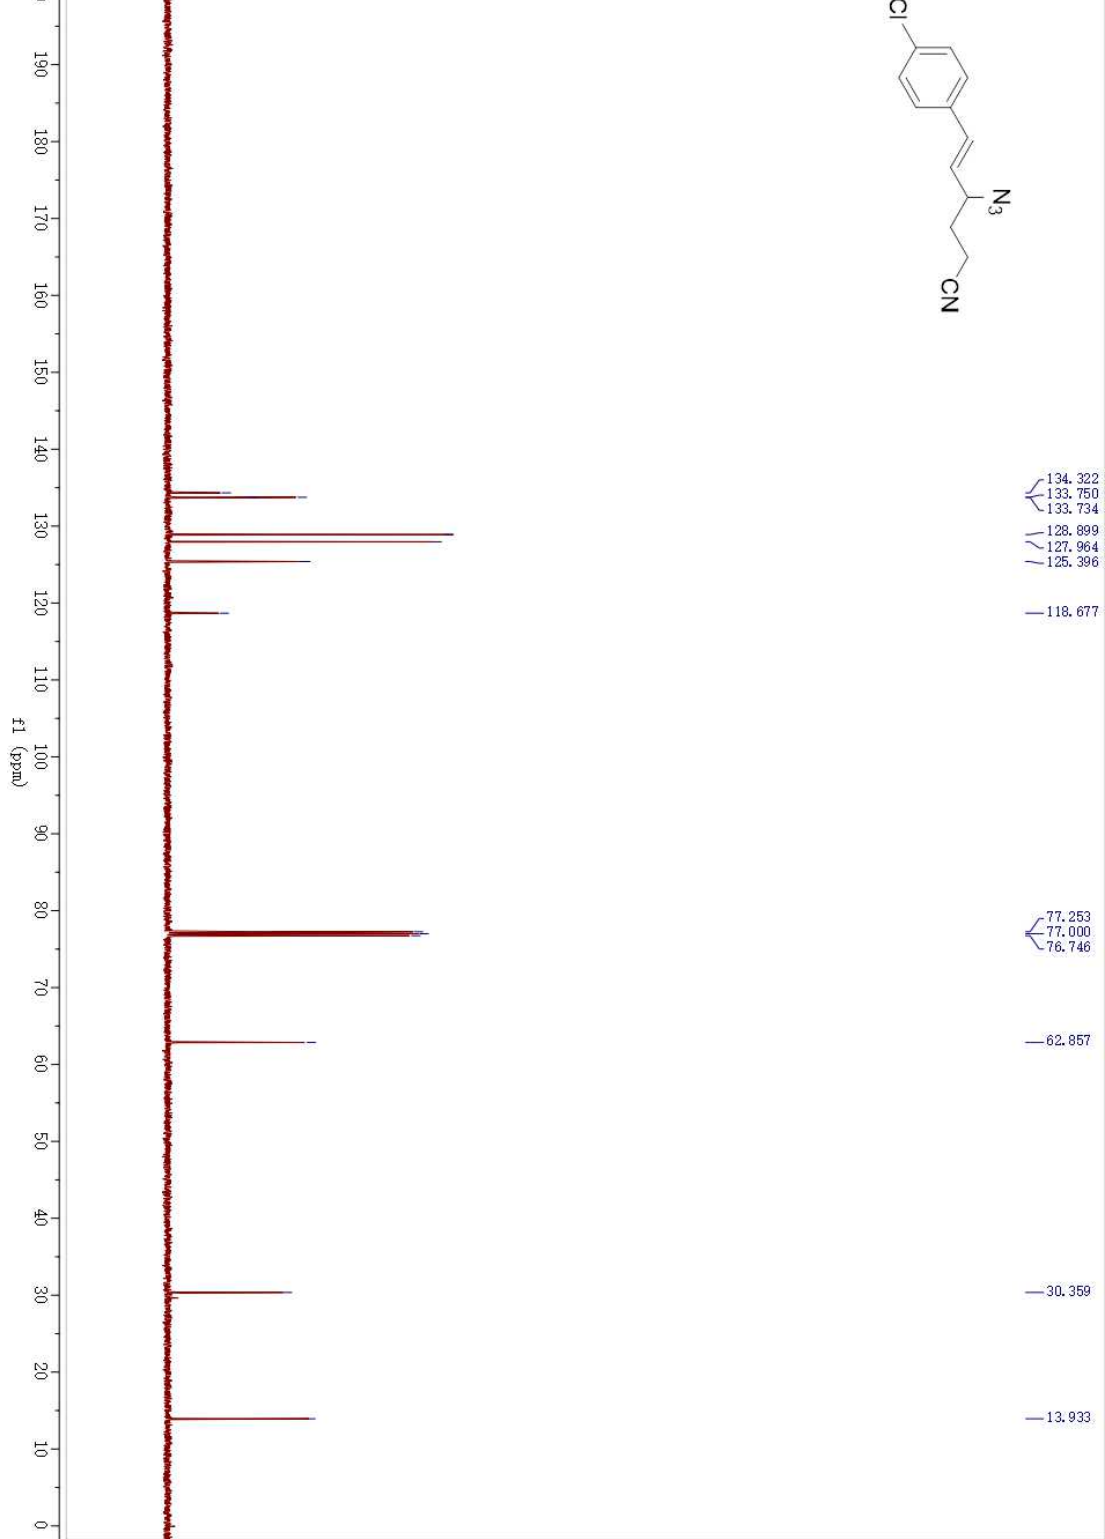

**(E)-4-azido-6-(4-f**

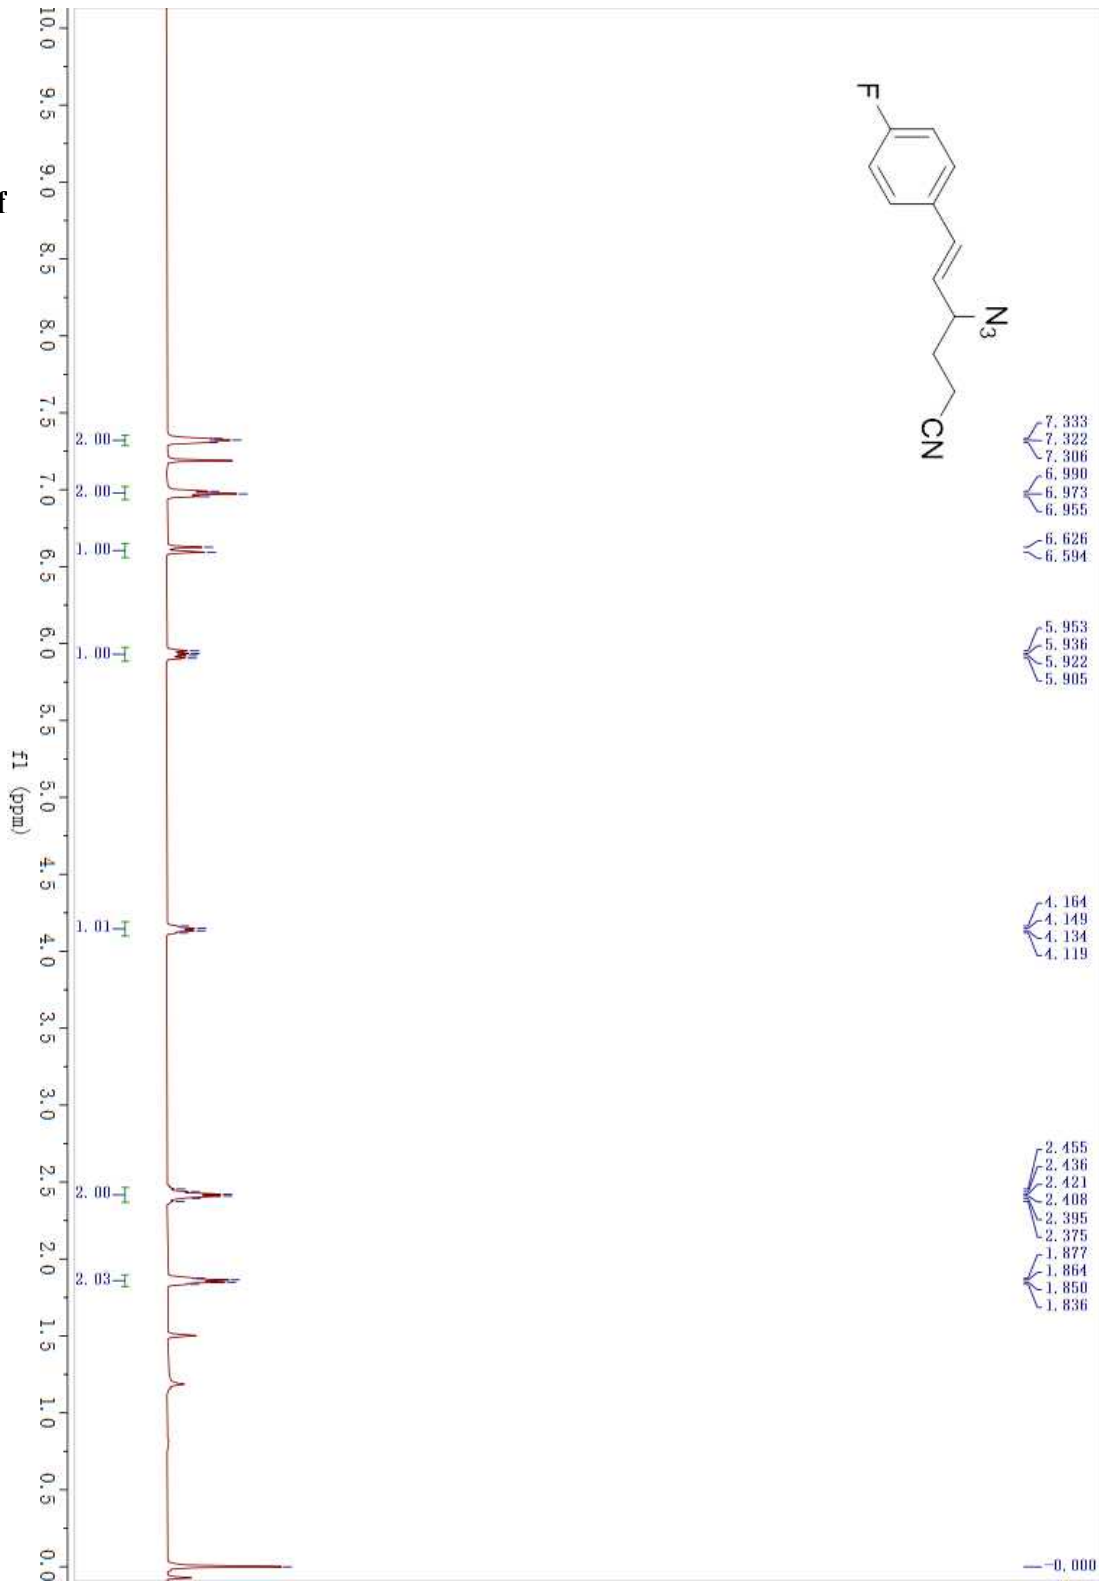

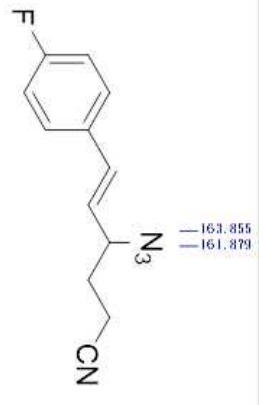

163.855  
161.879

133.930  
131.462  
131.437  
128.466  
128.461  
124.497  
124.478

77.254  
77.000  
76.746

62.973

30.442

13.973

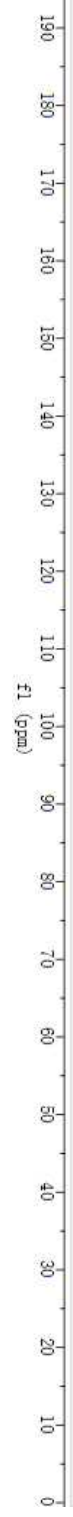

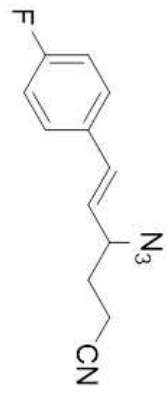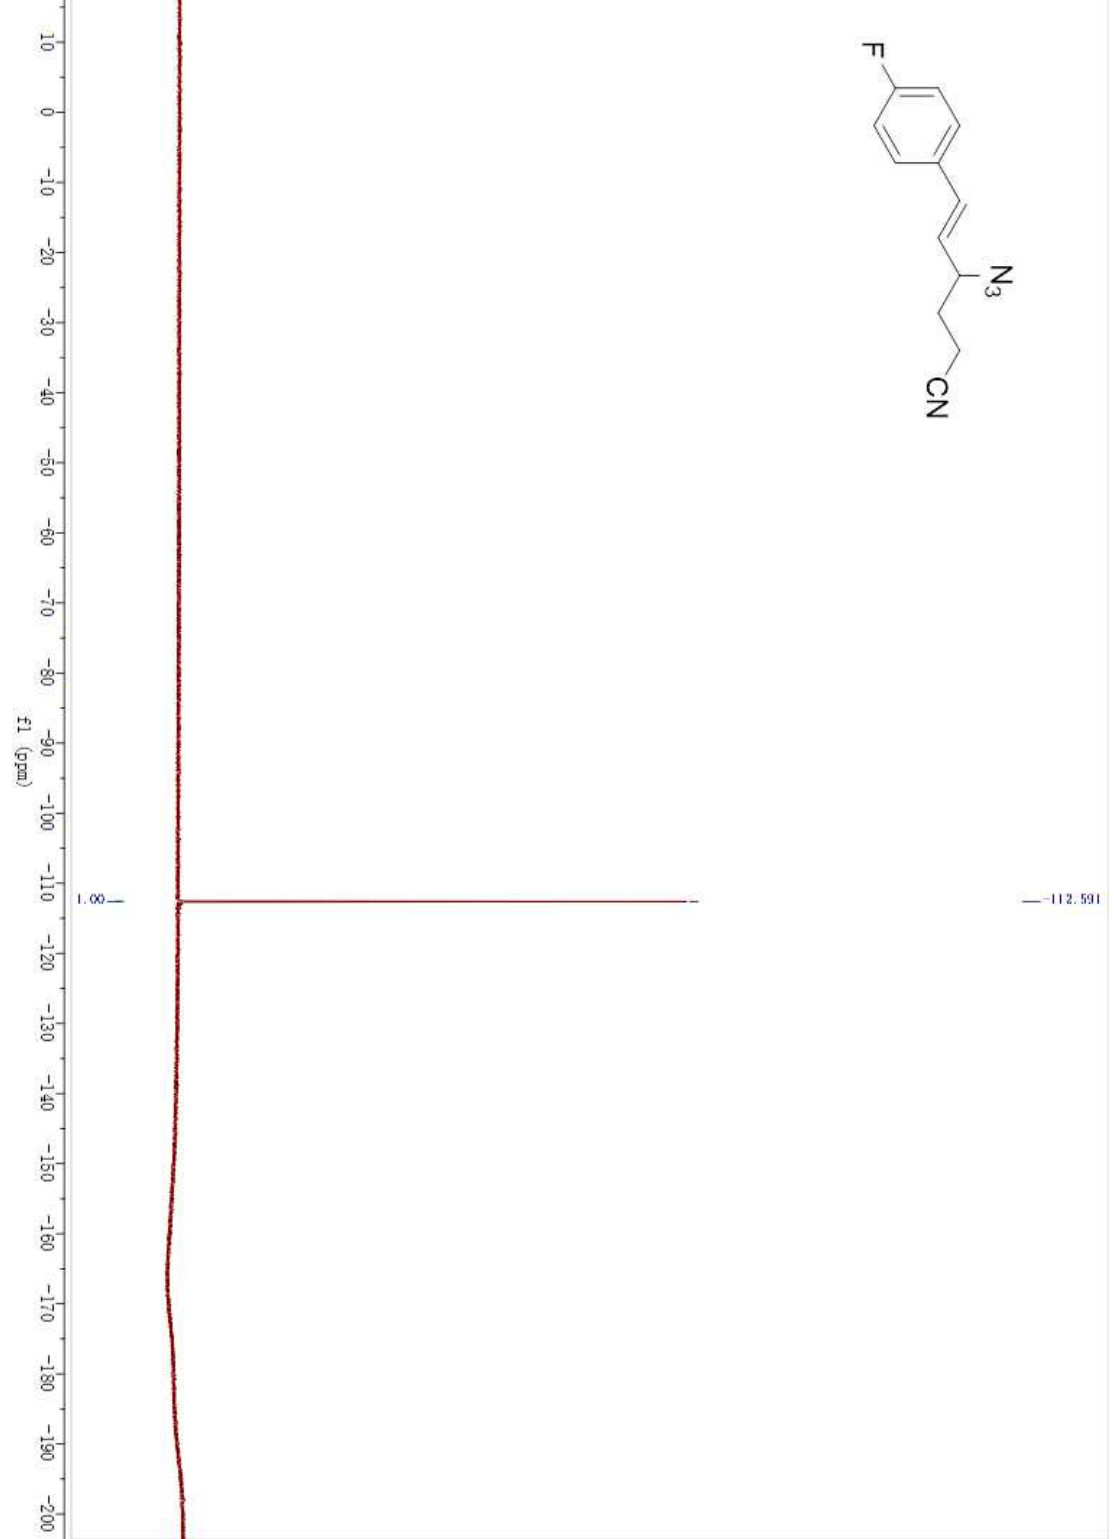

**(E)-4-azido-6-(3-c**

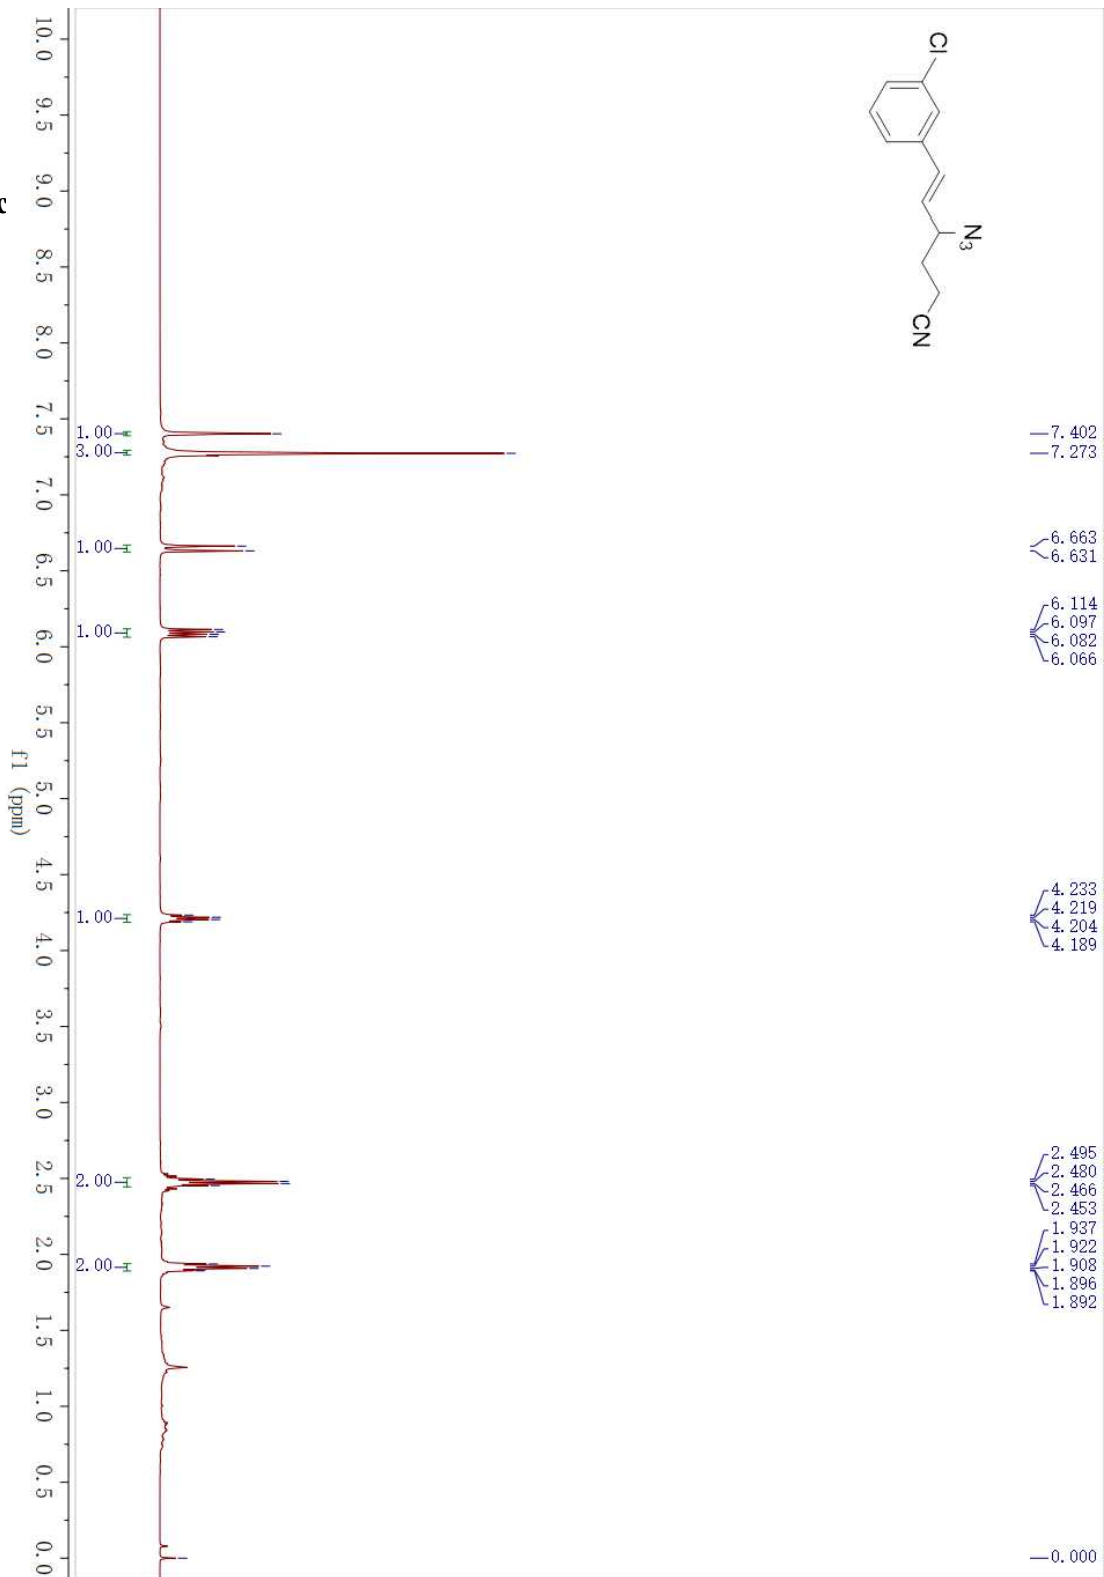



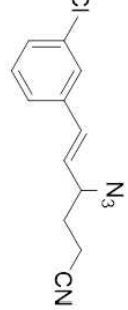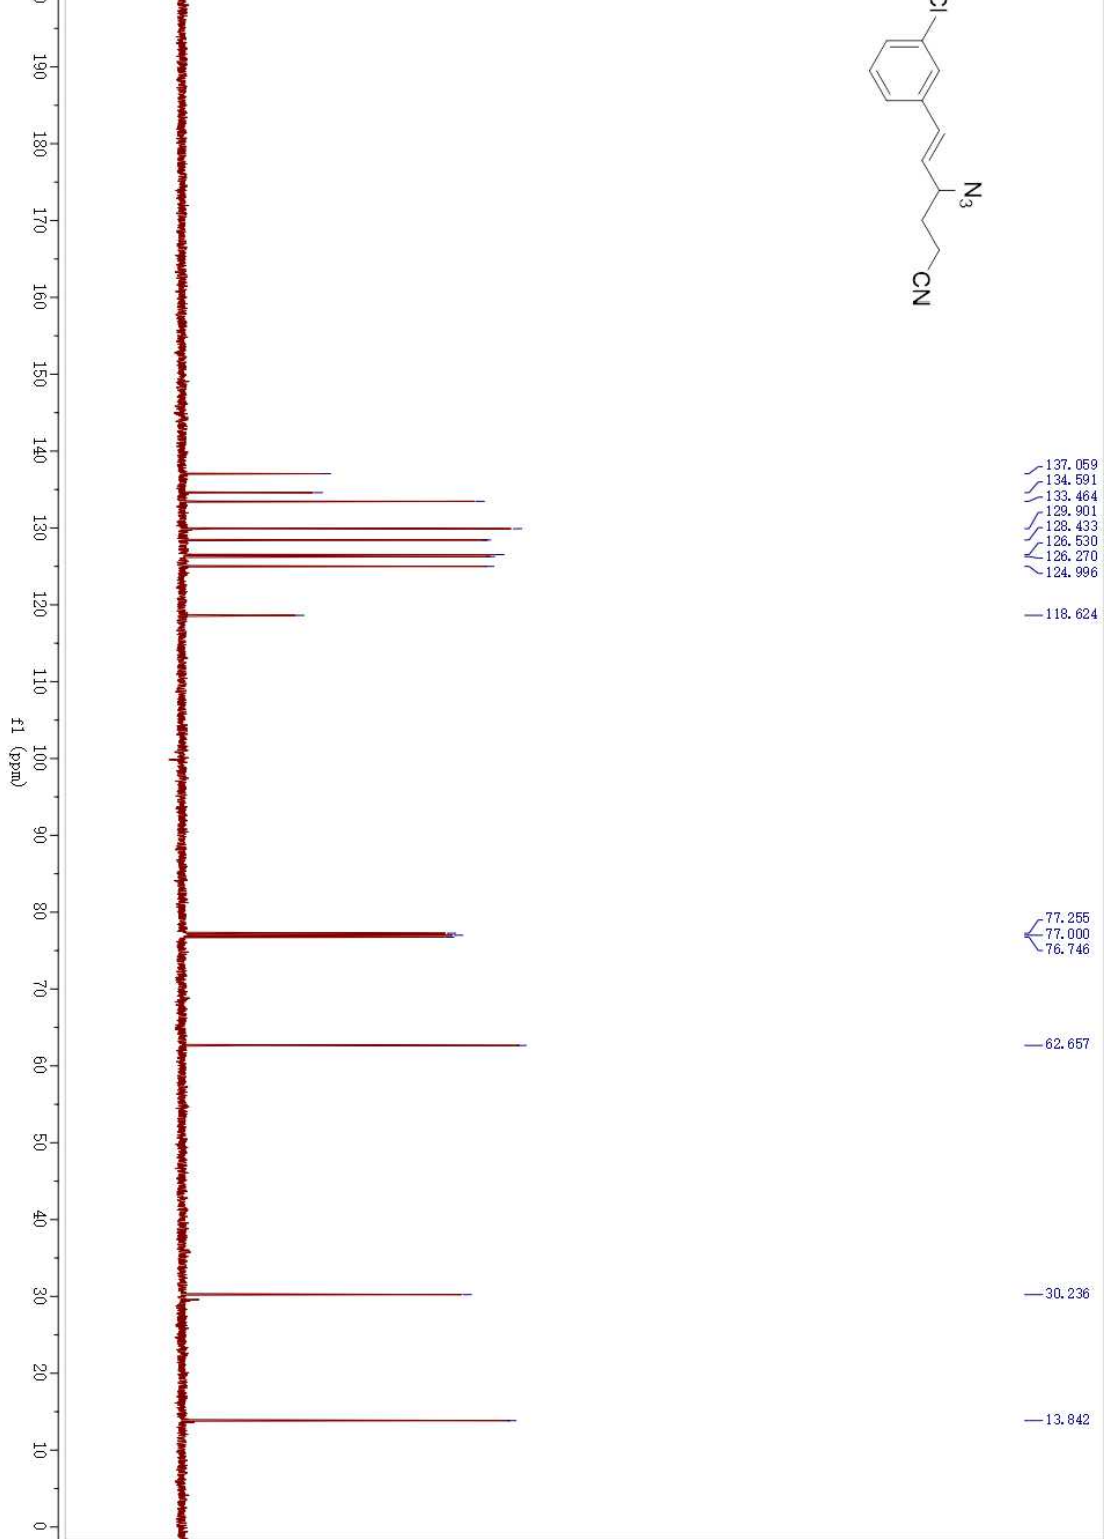

**(E)-4-azido-6-(3-methoxyphenyl)-6-cyano-1-butene**

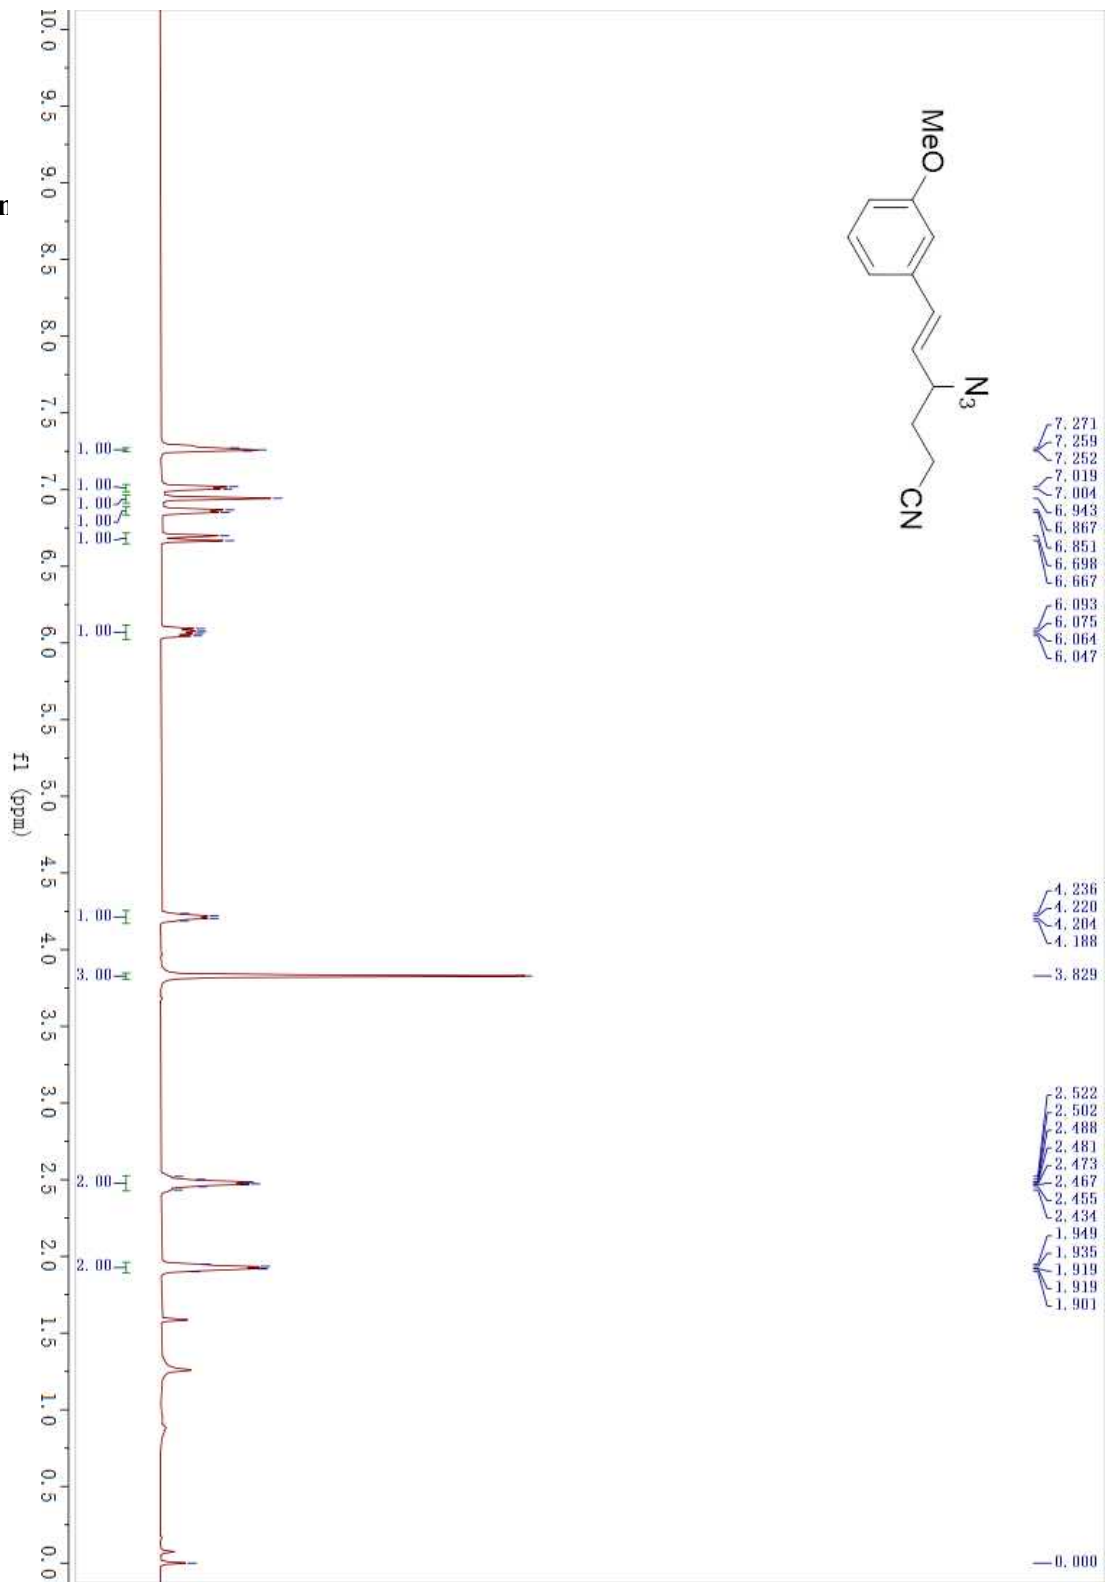

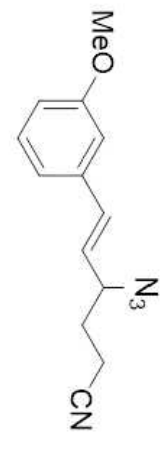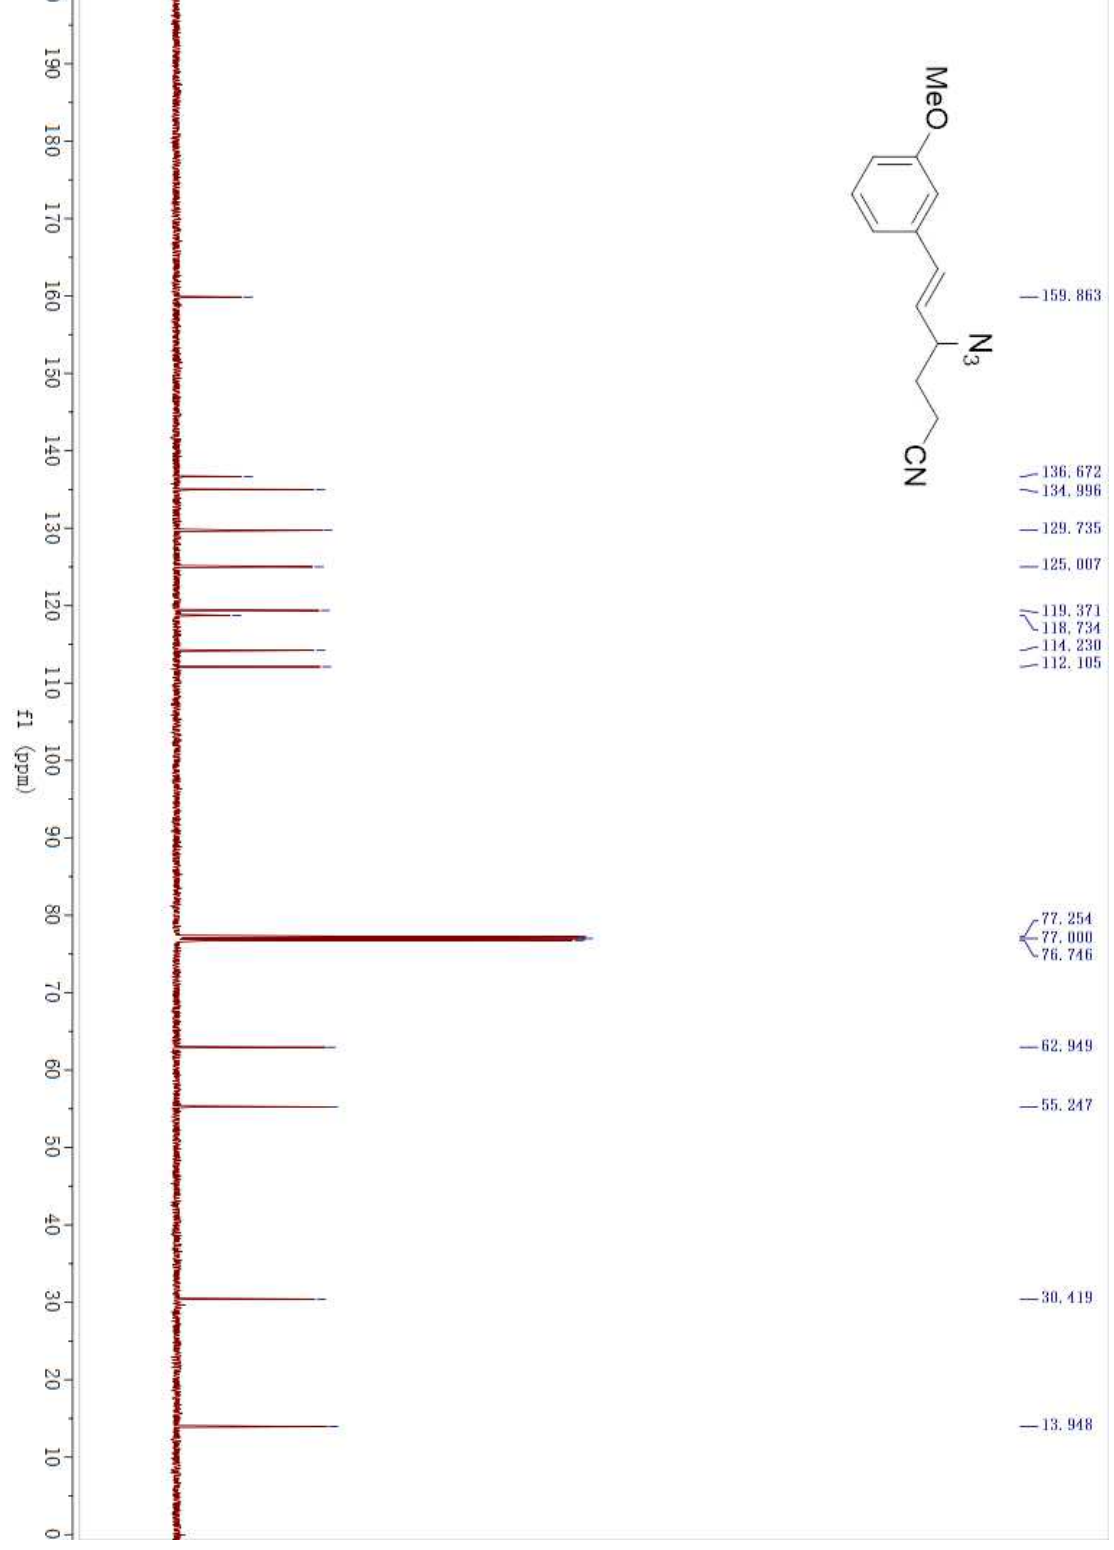

**(E)-4-azido-6-(2-methoxyphenyl)hexanenitrile**

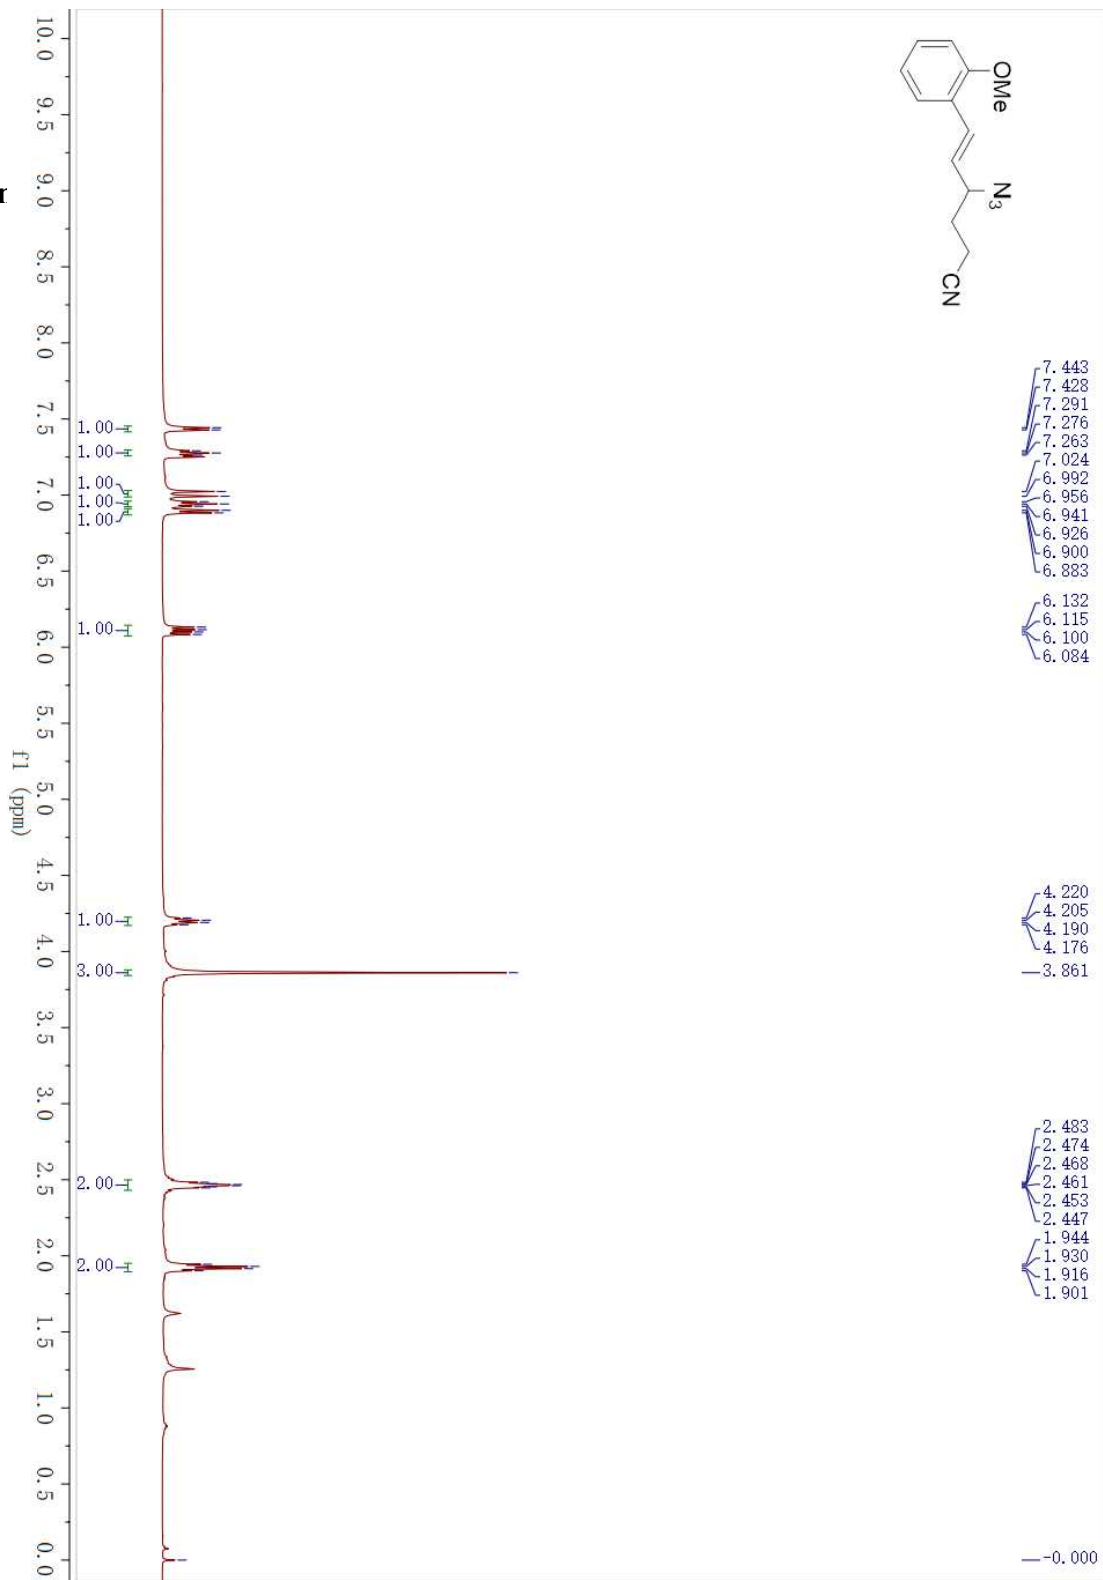

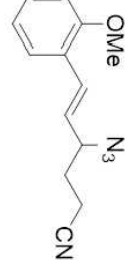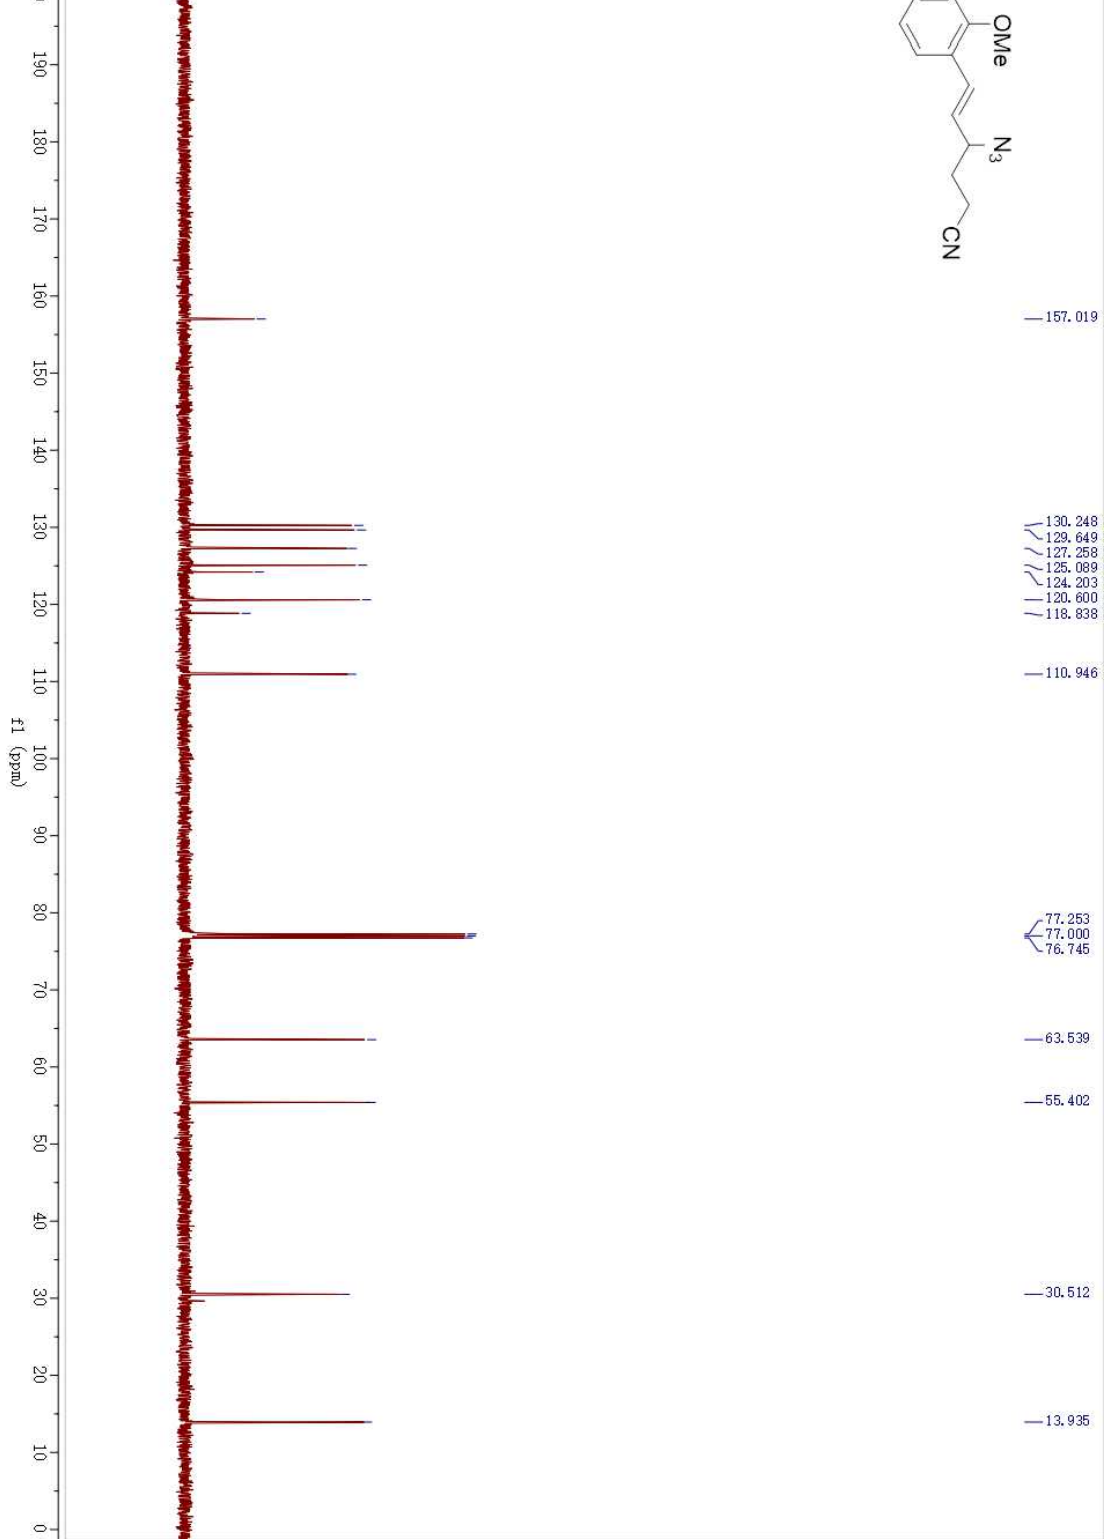

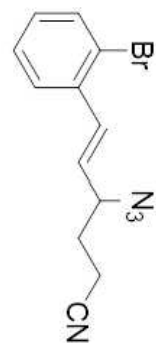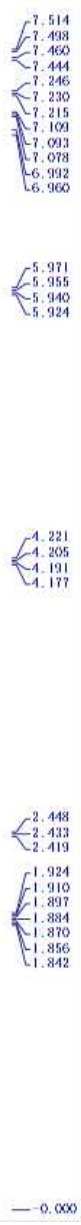

**(E)-4-azido-6-(2-t**

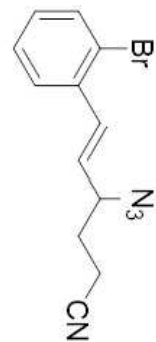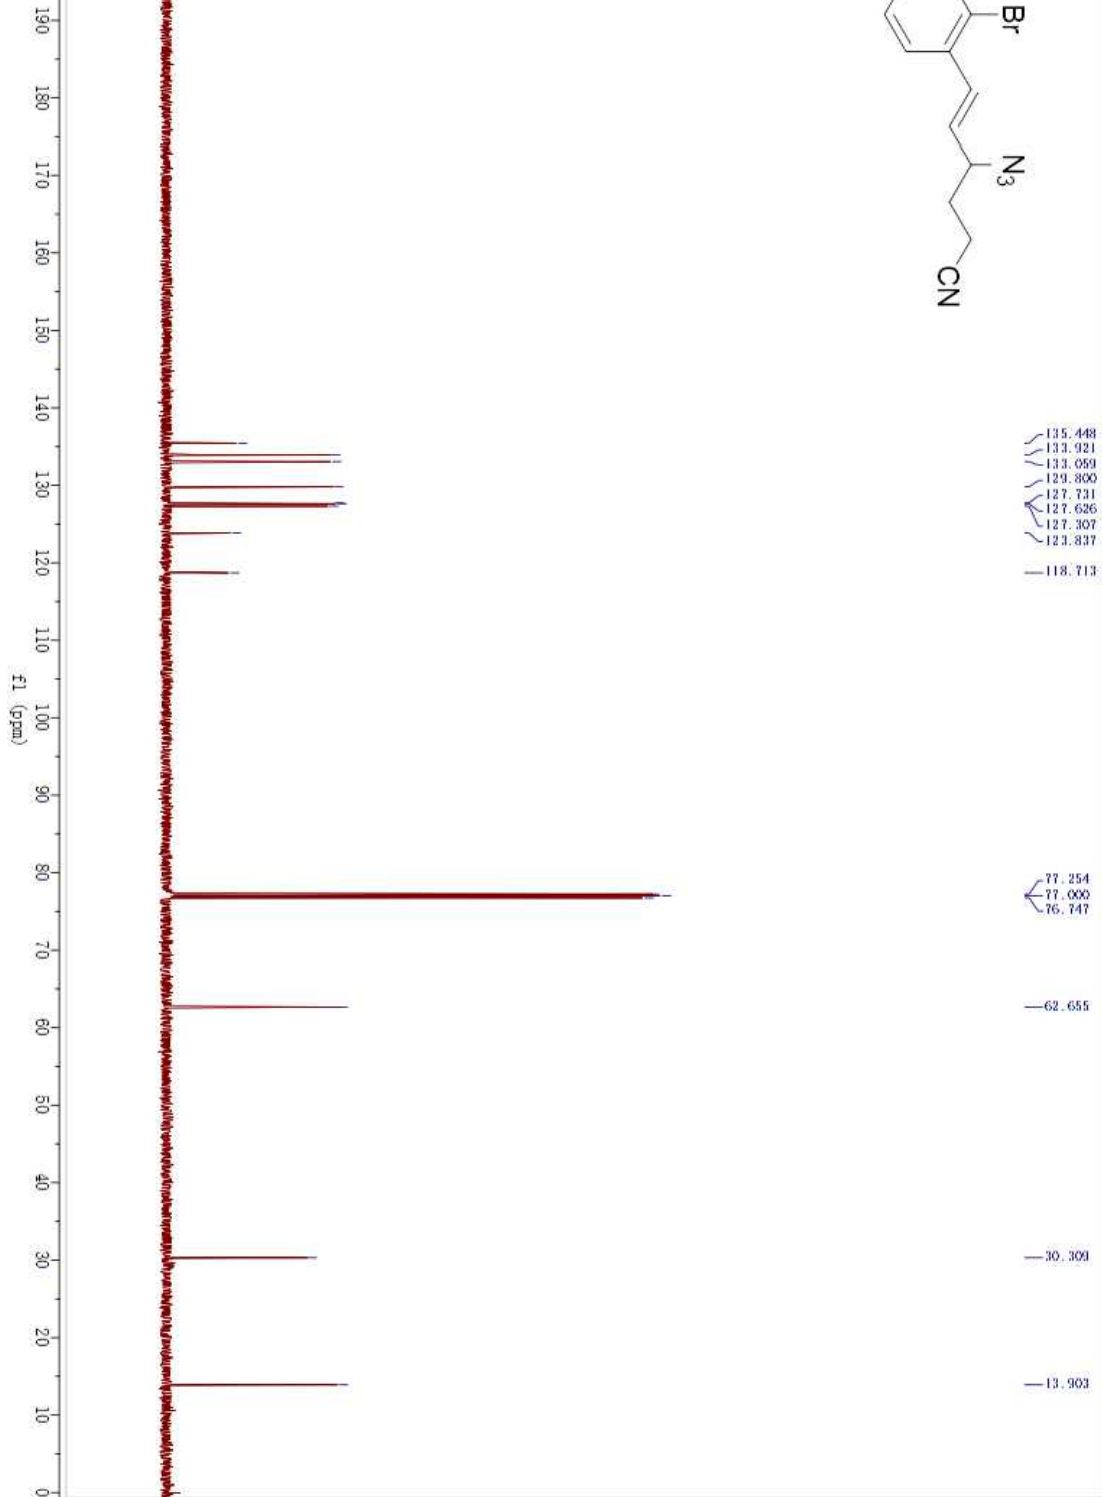

**(E)-4-azido-6-(2-c**

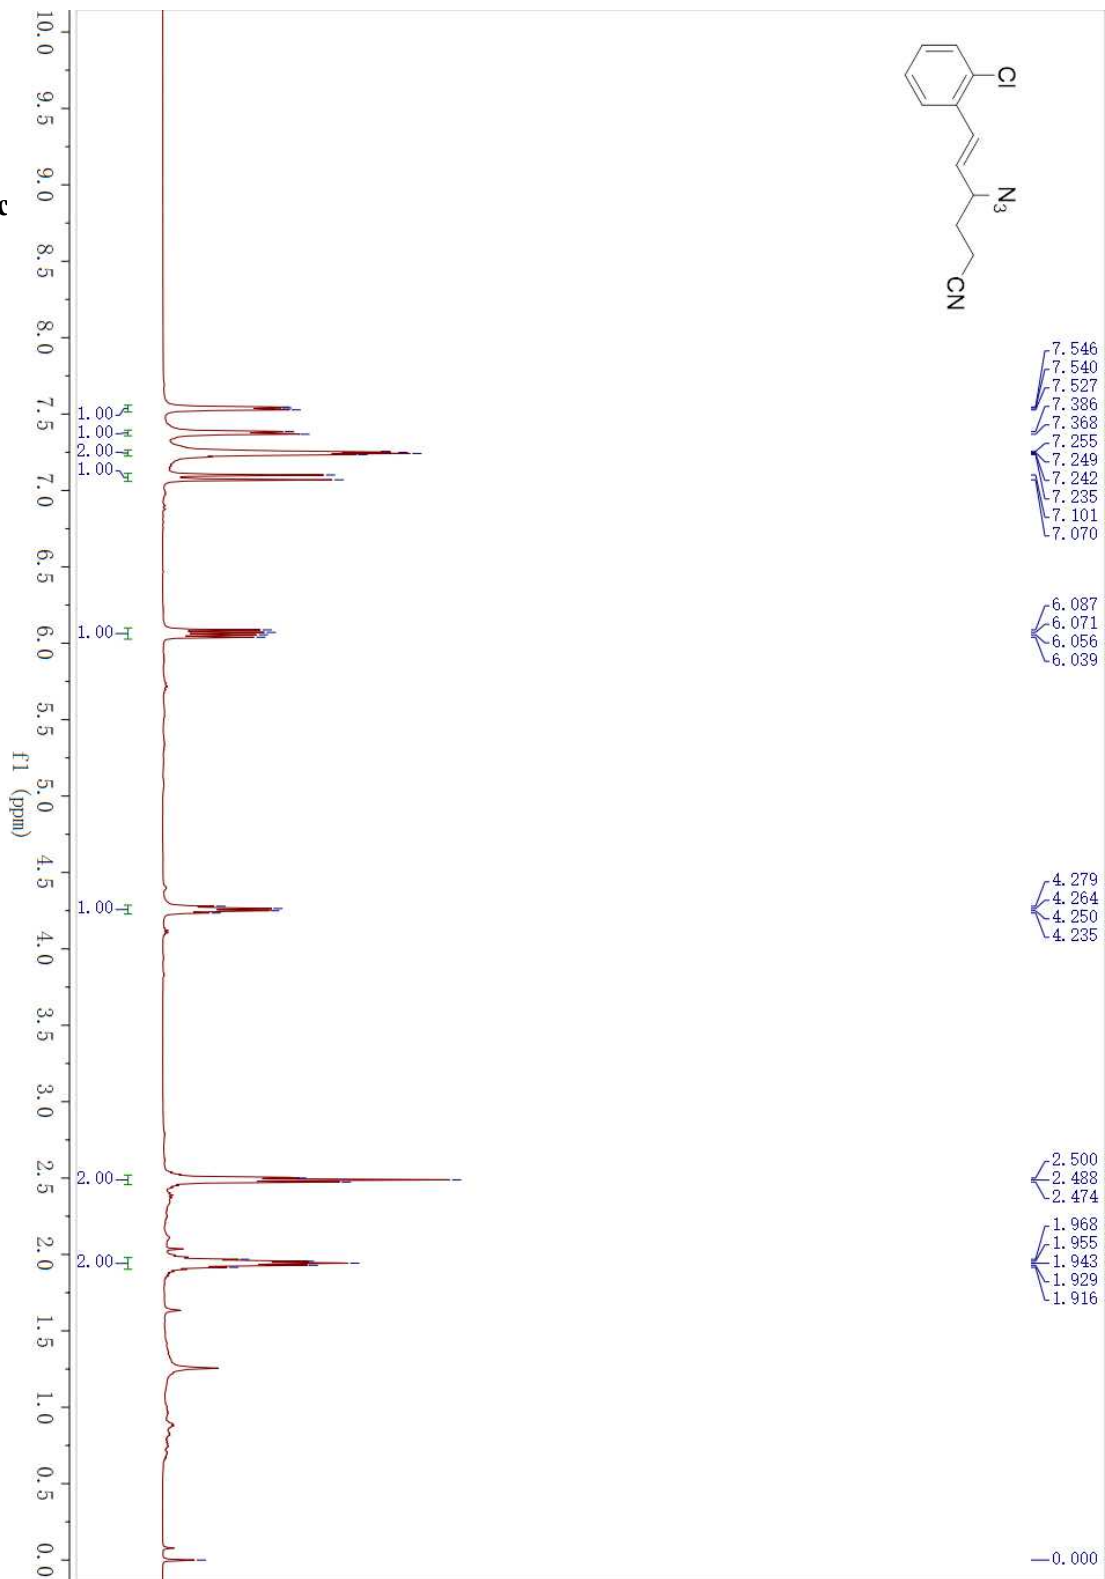



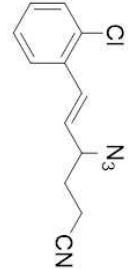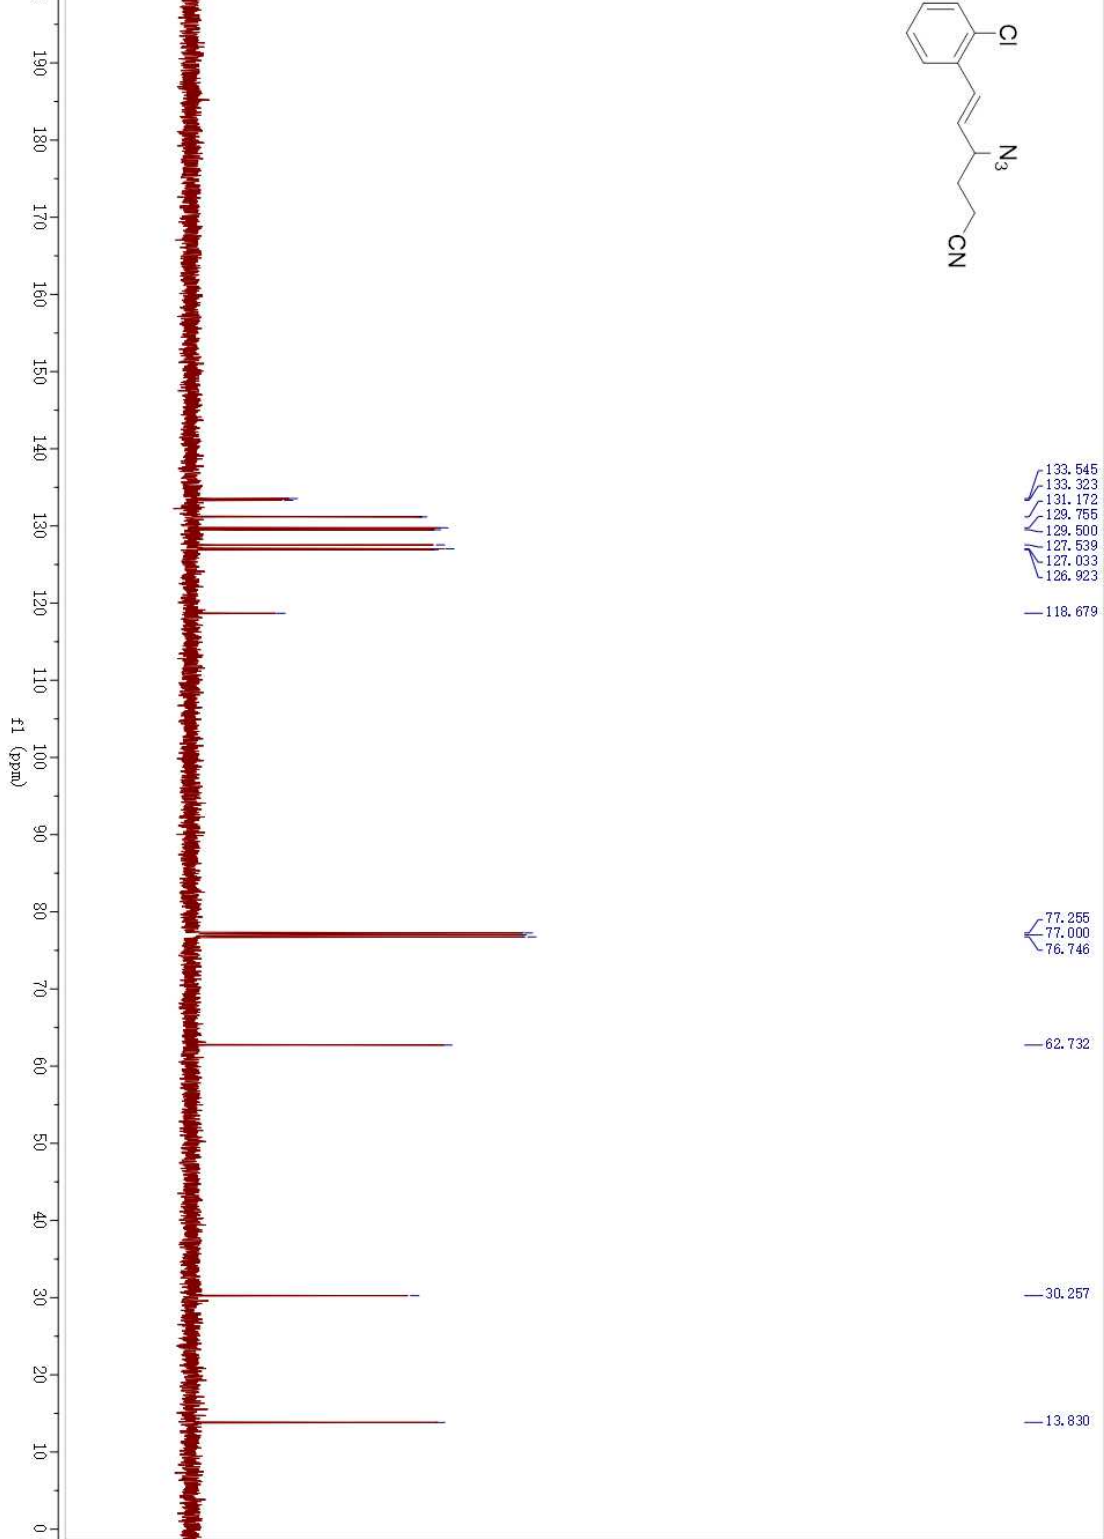

**(E)-4-azido-6-(3,4**

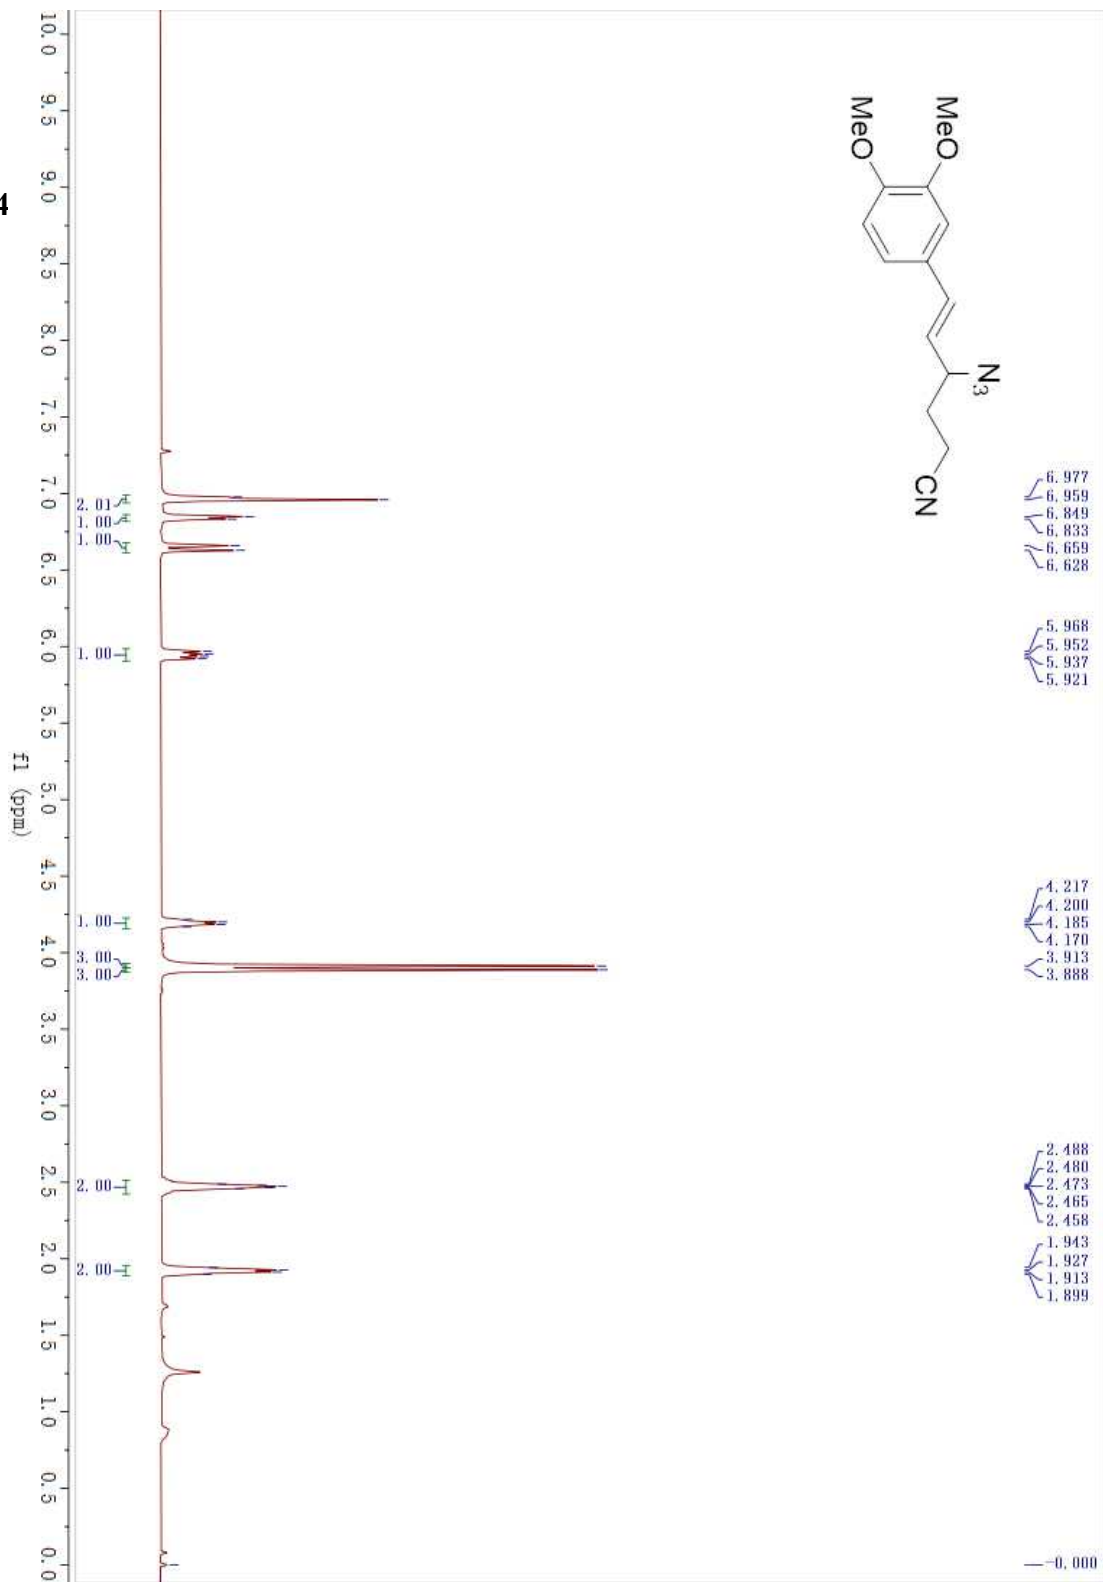

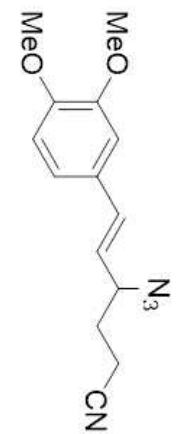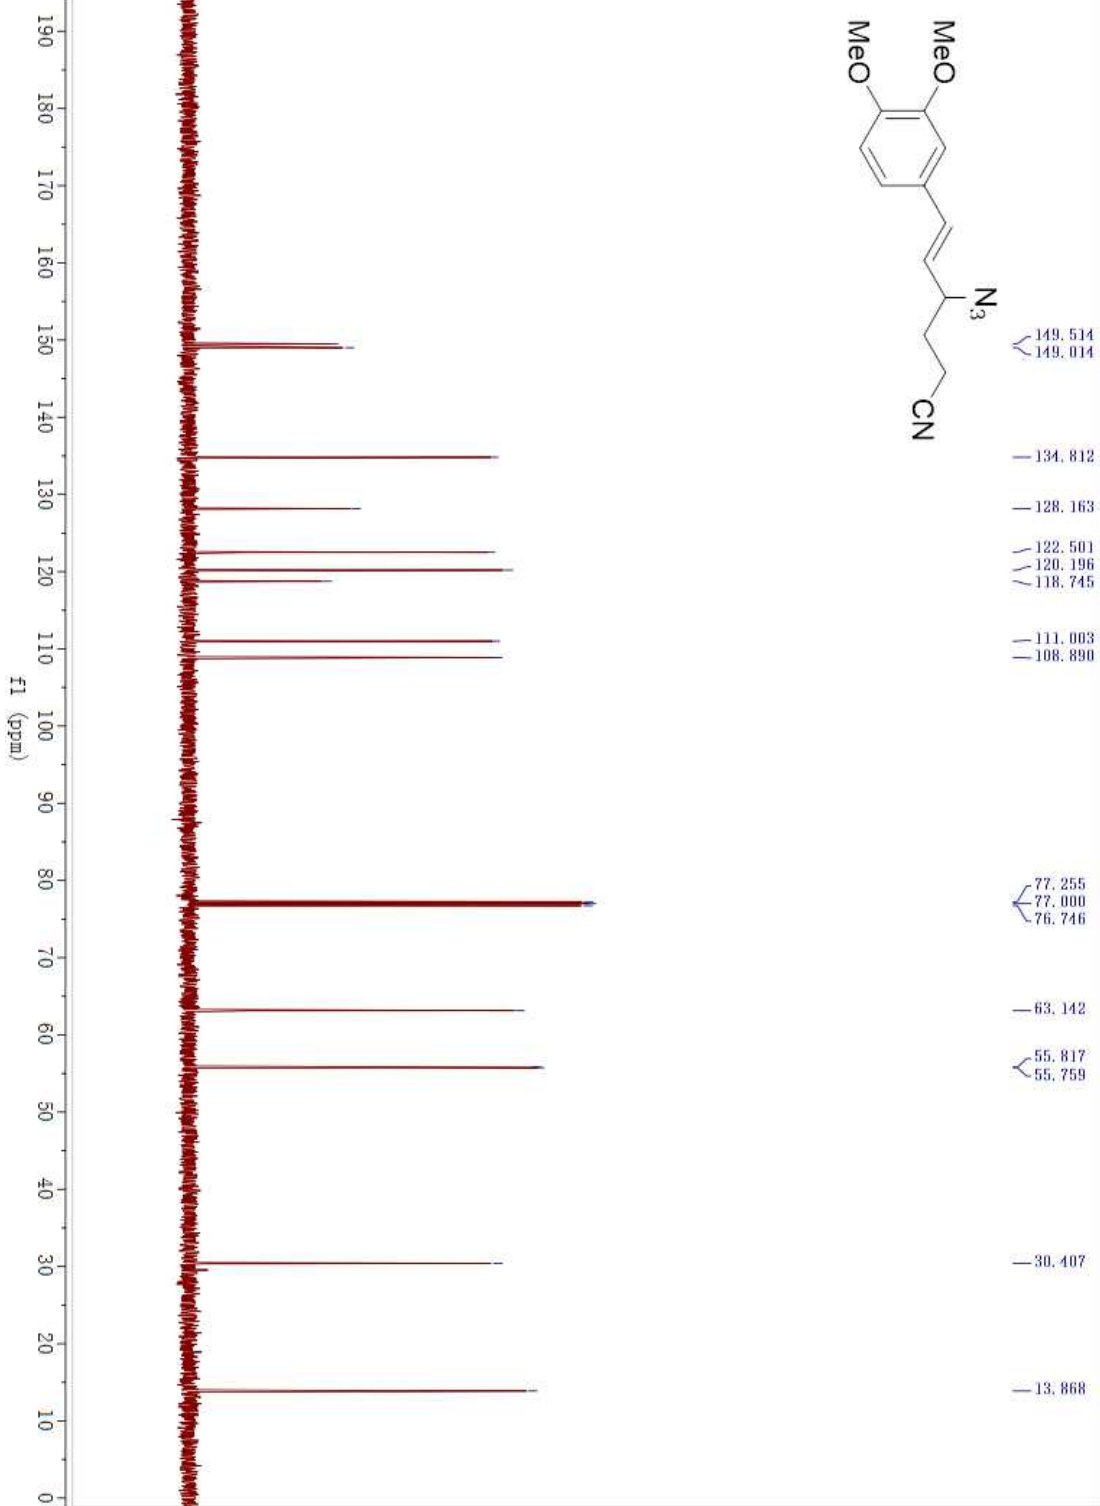

**(E)-4-azido-6-(2,4**

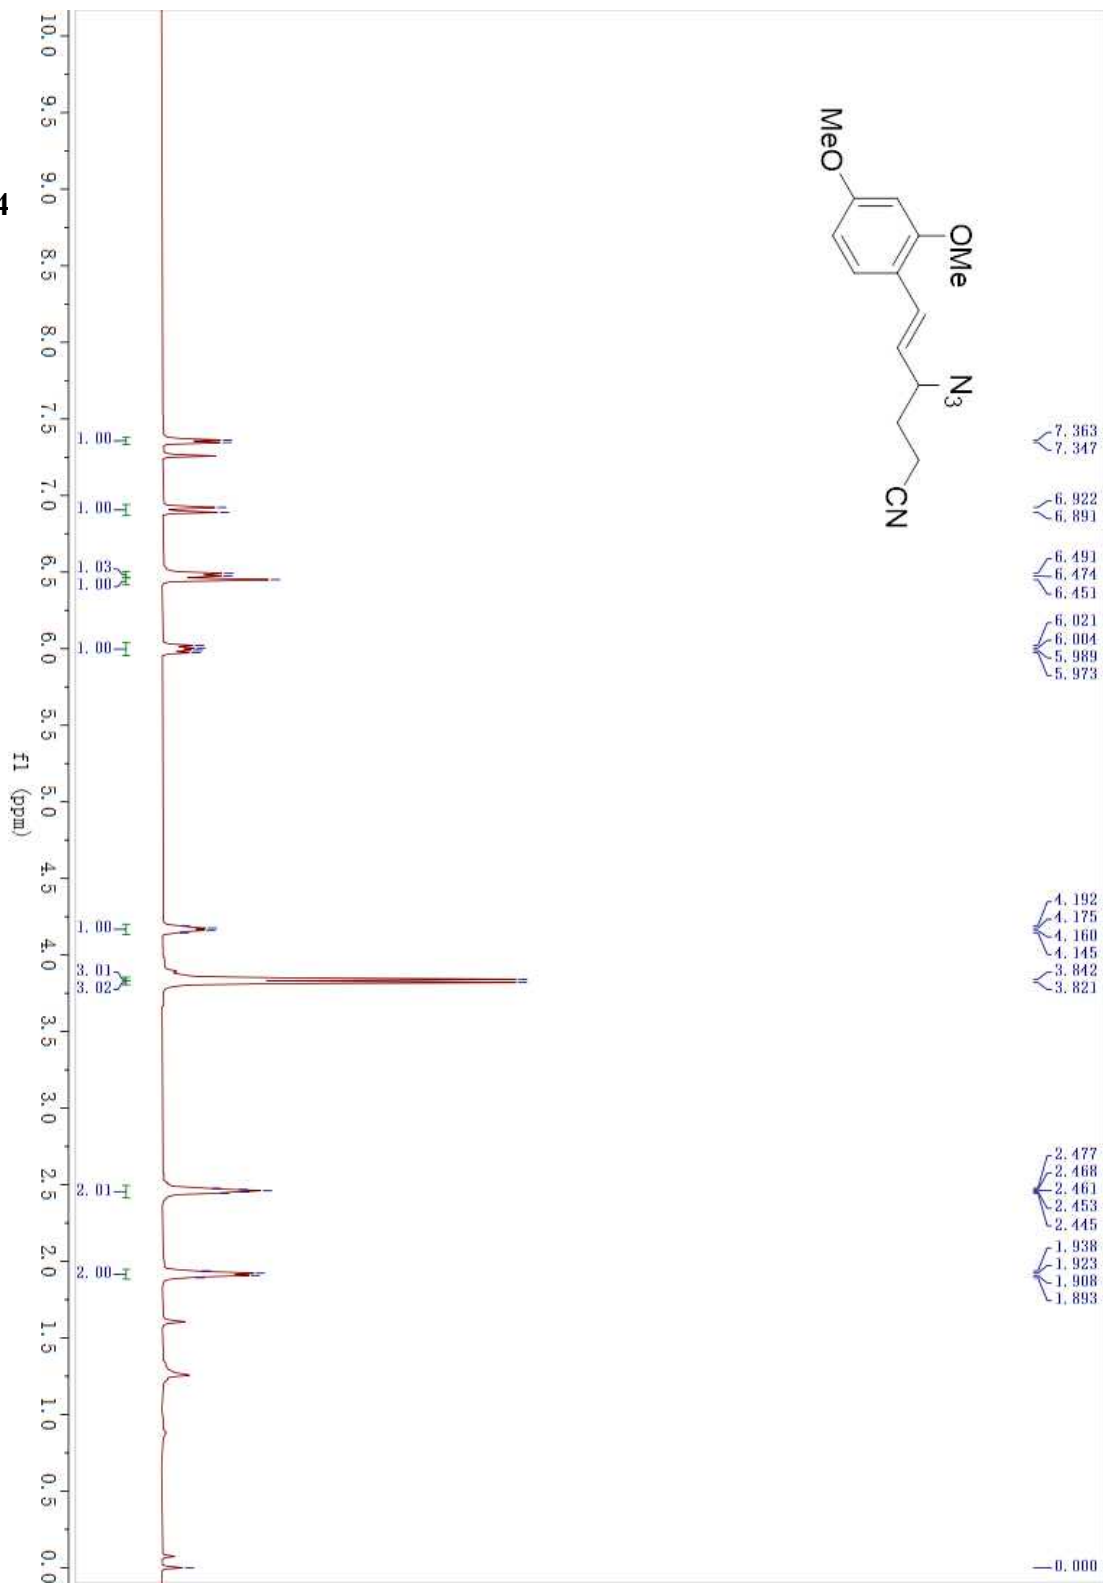

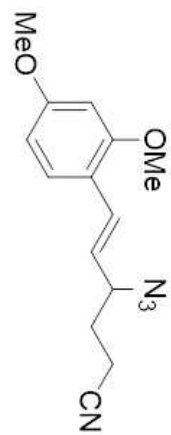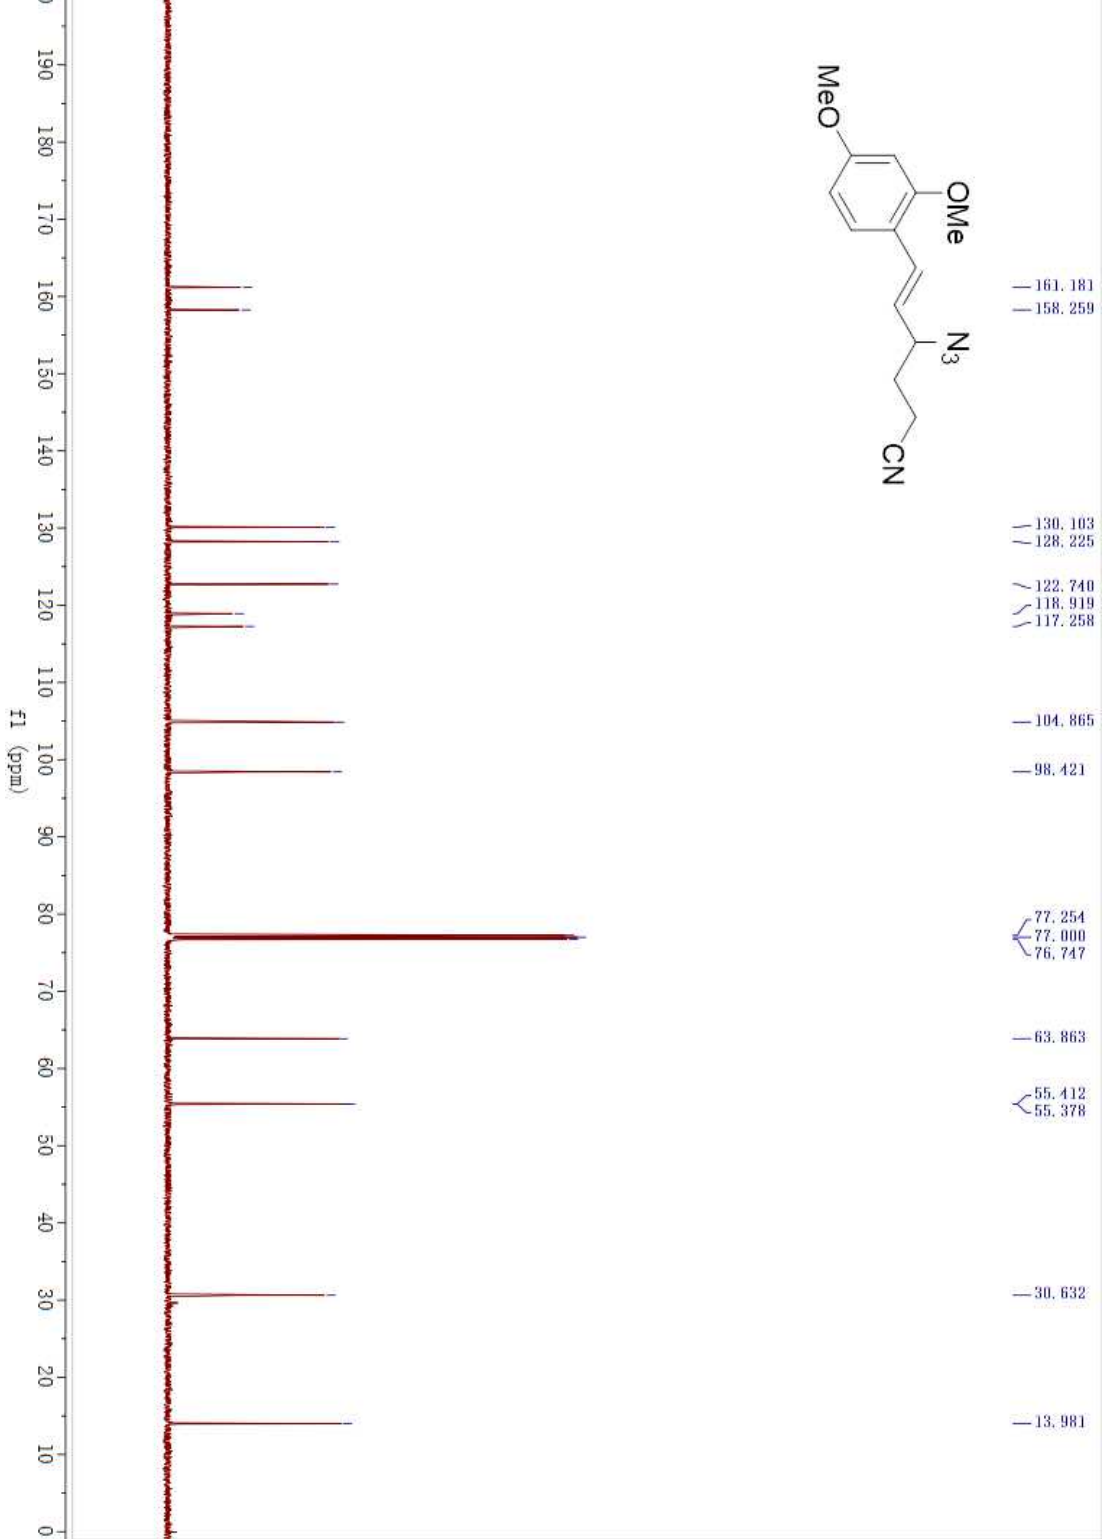

**(E)-4-azido-6-(naphthalen-2-yl)hexanenitrile**

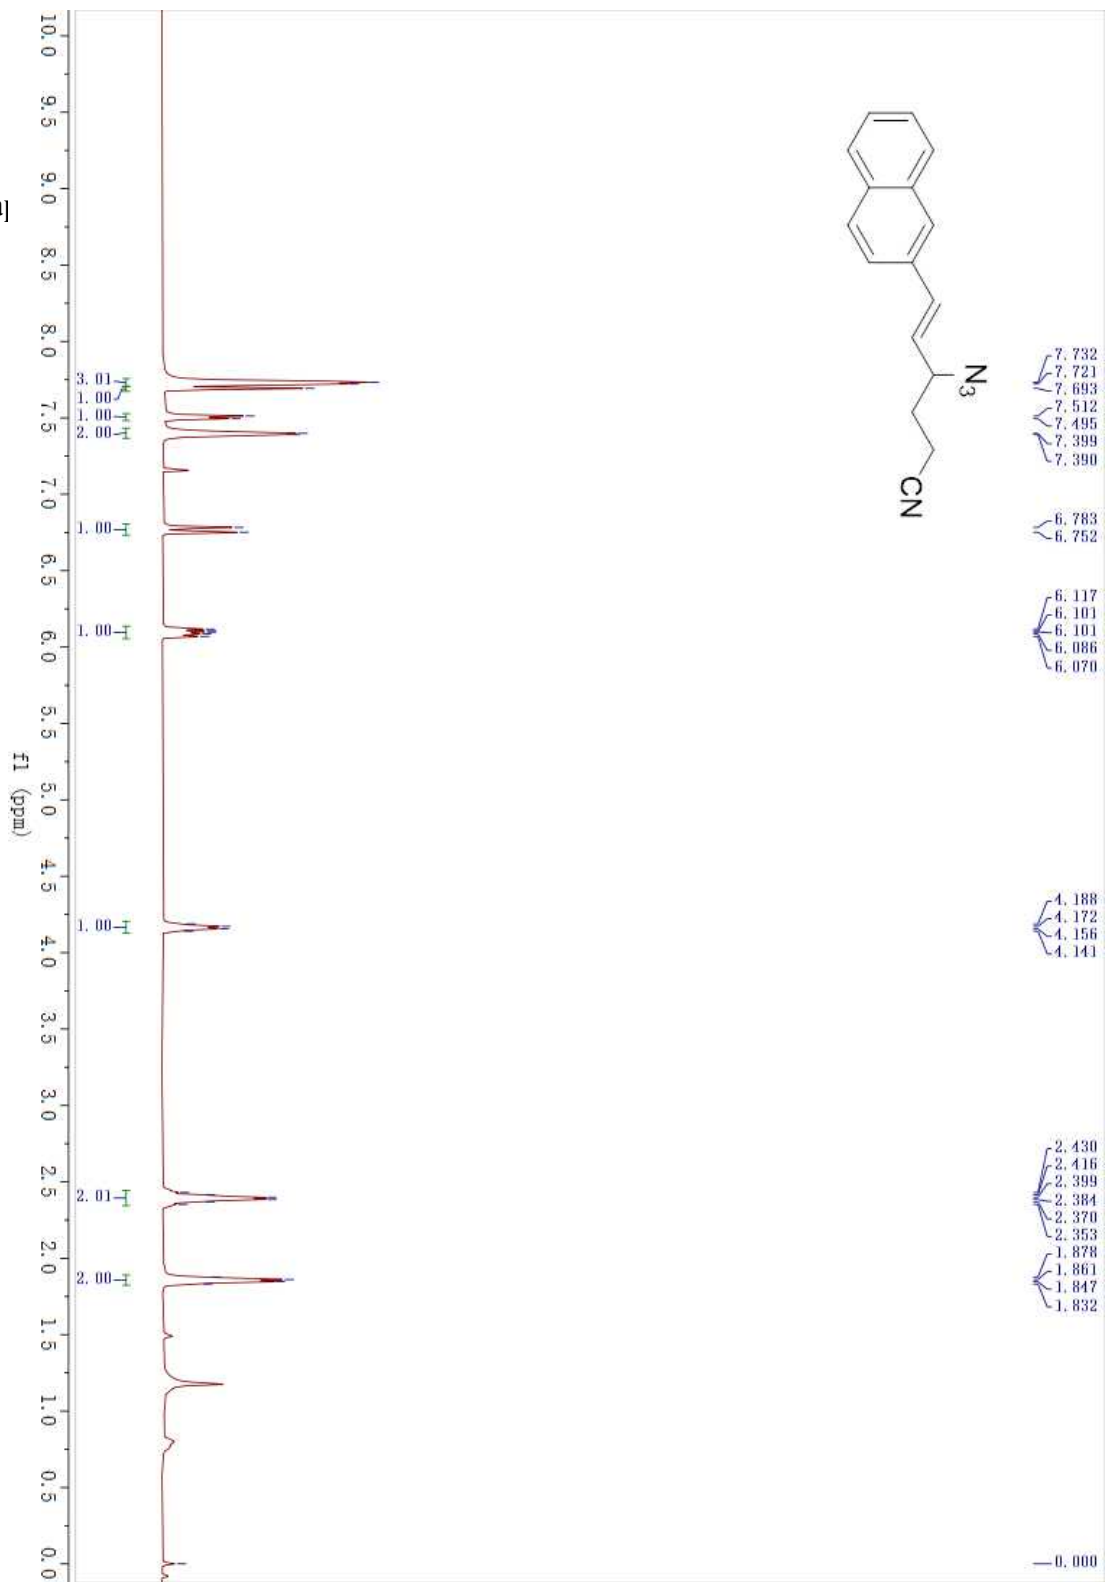

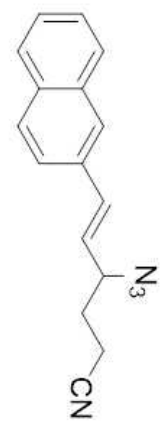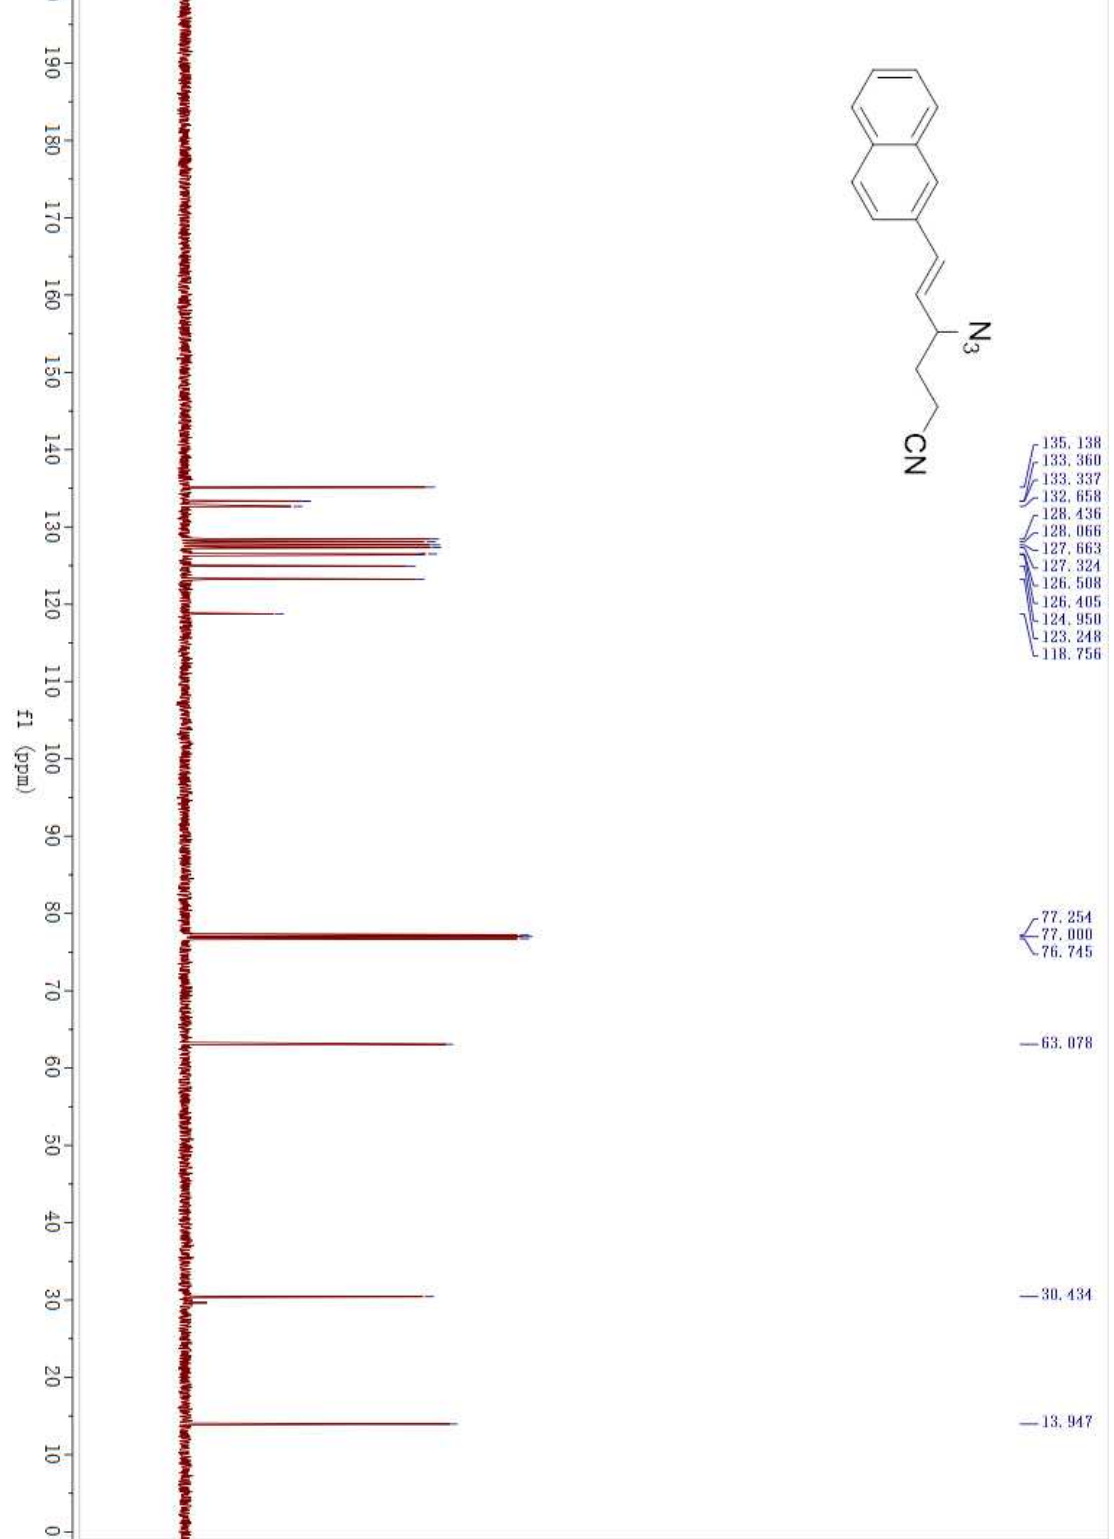

**(E)-6-(anthracen-**

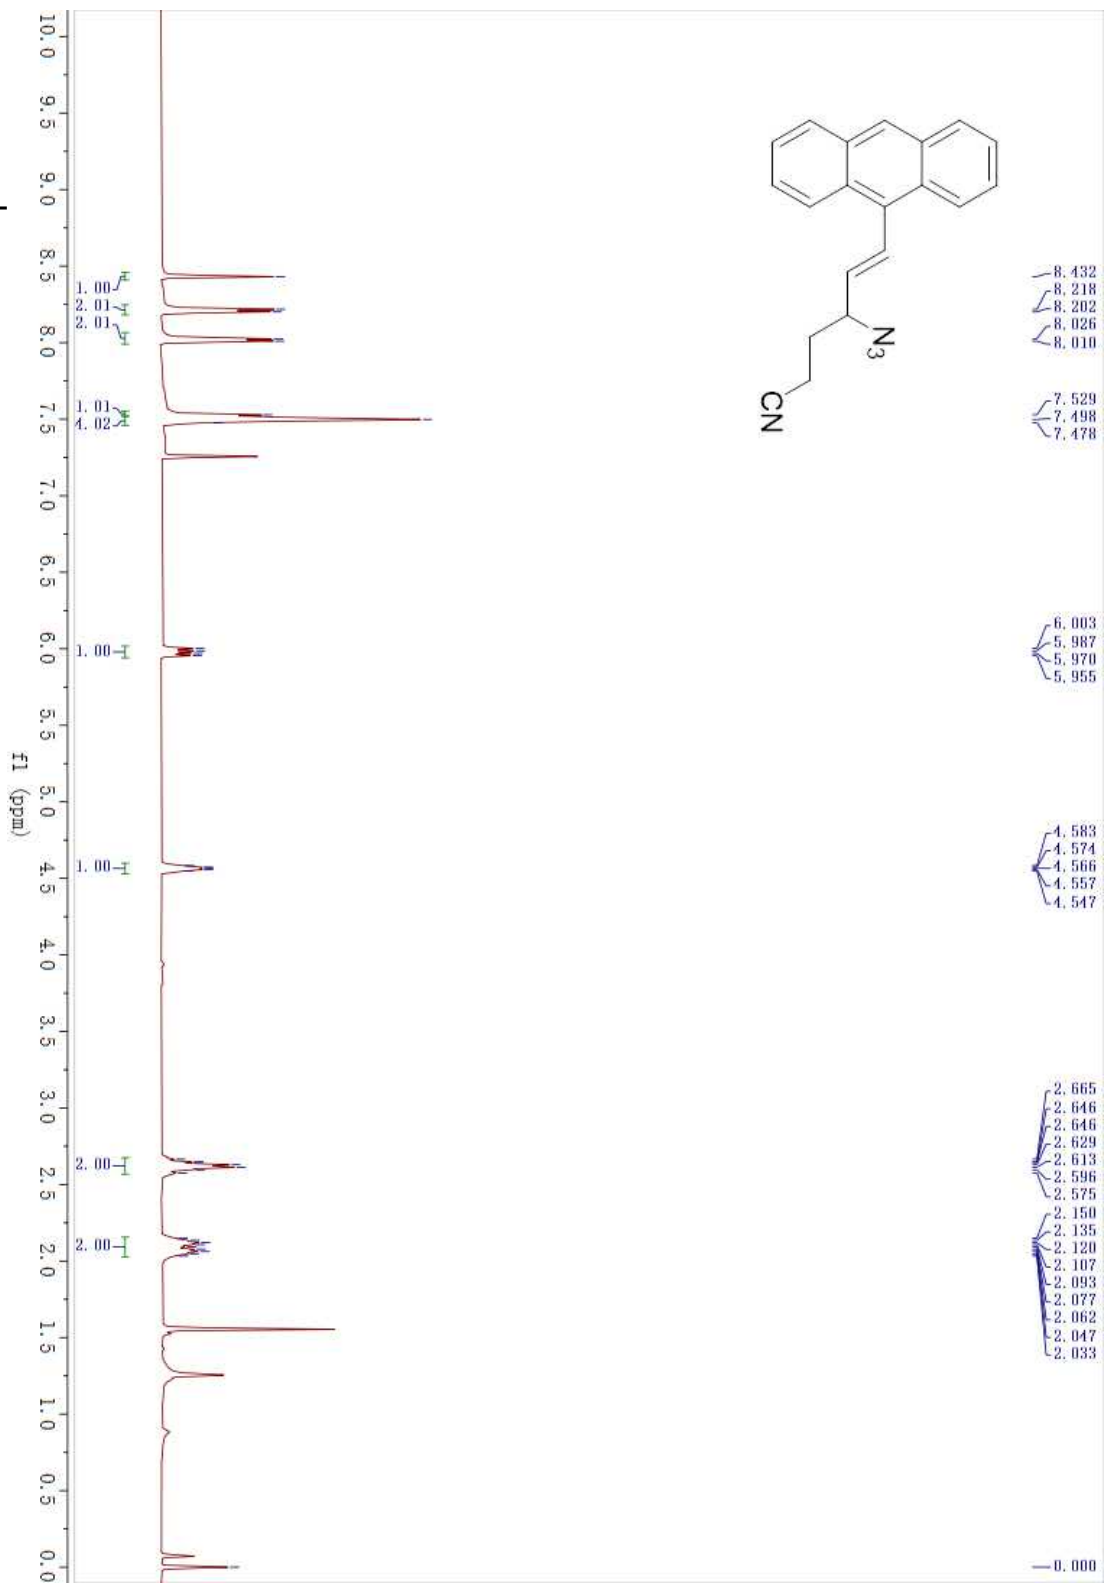



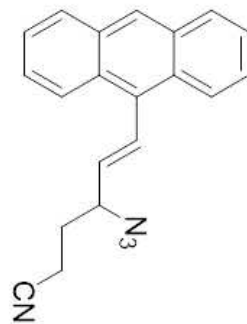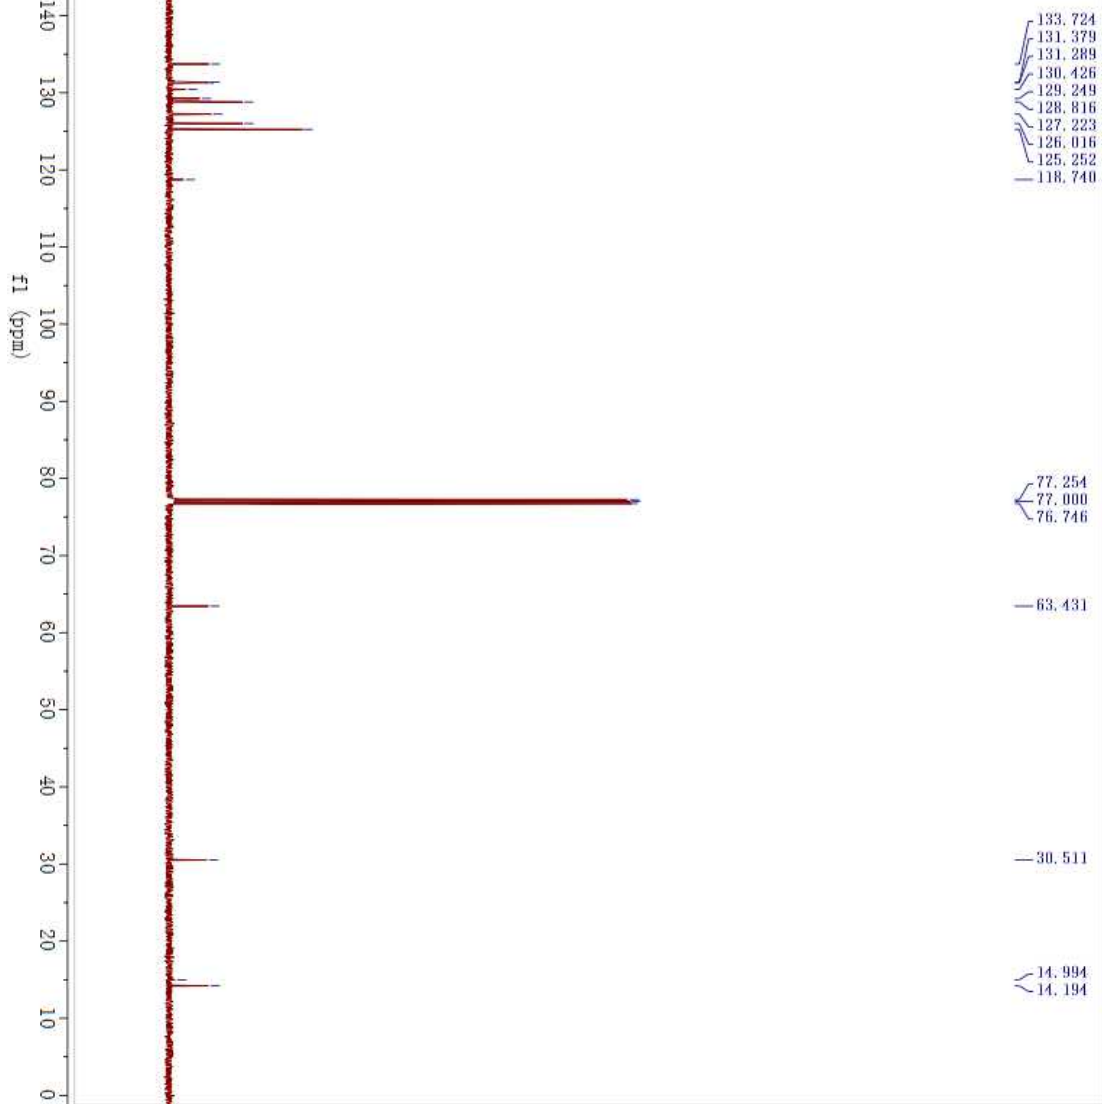

**(E)-4-azido-6-(fur**

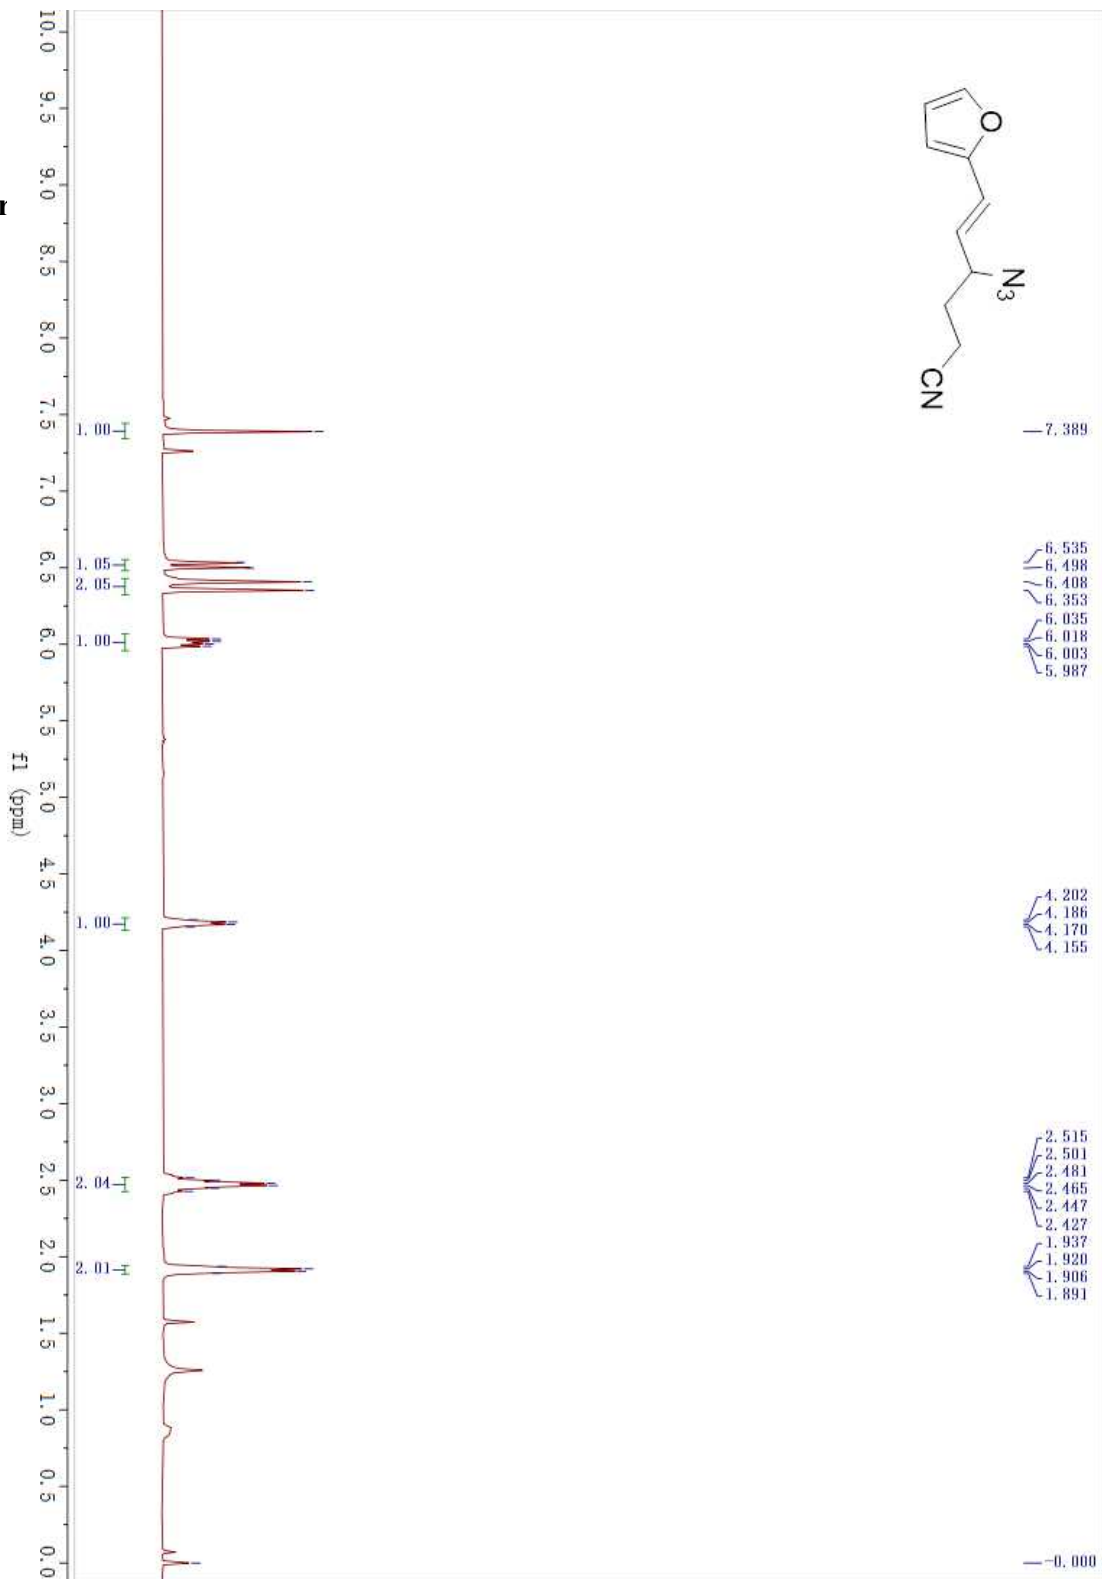

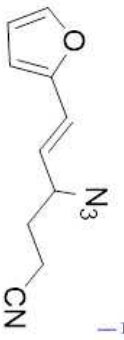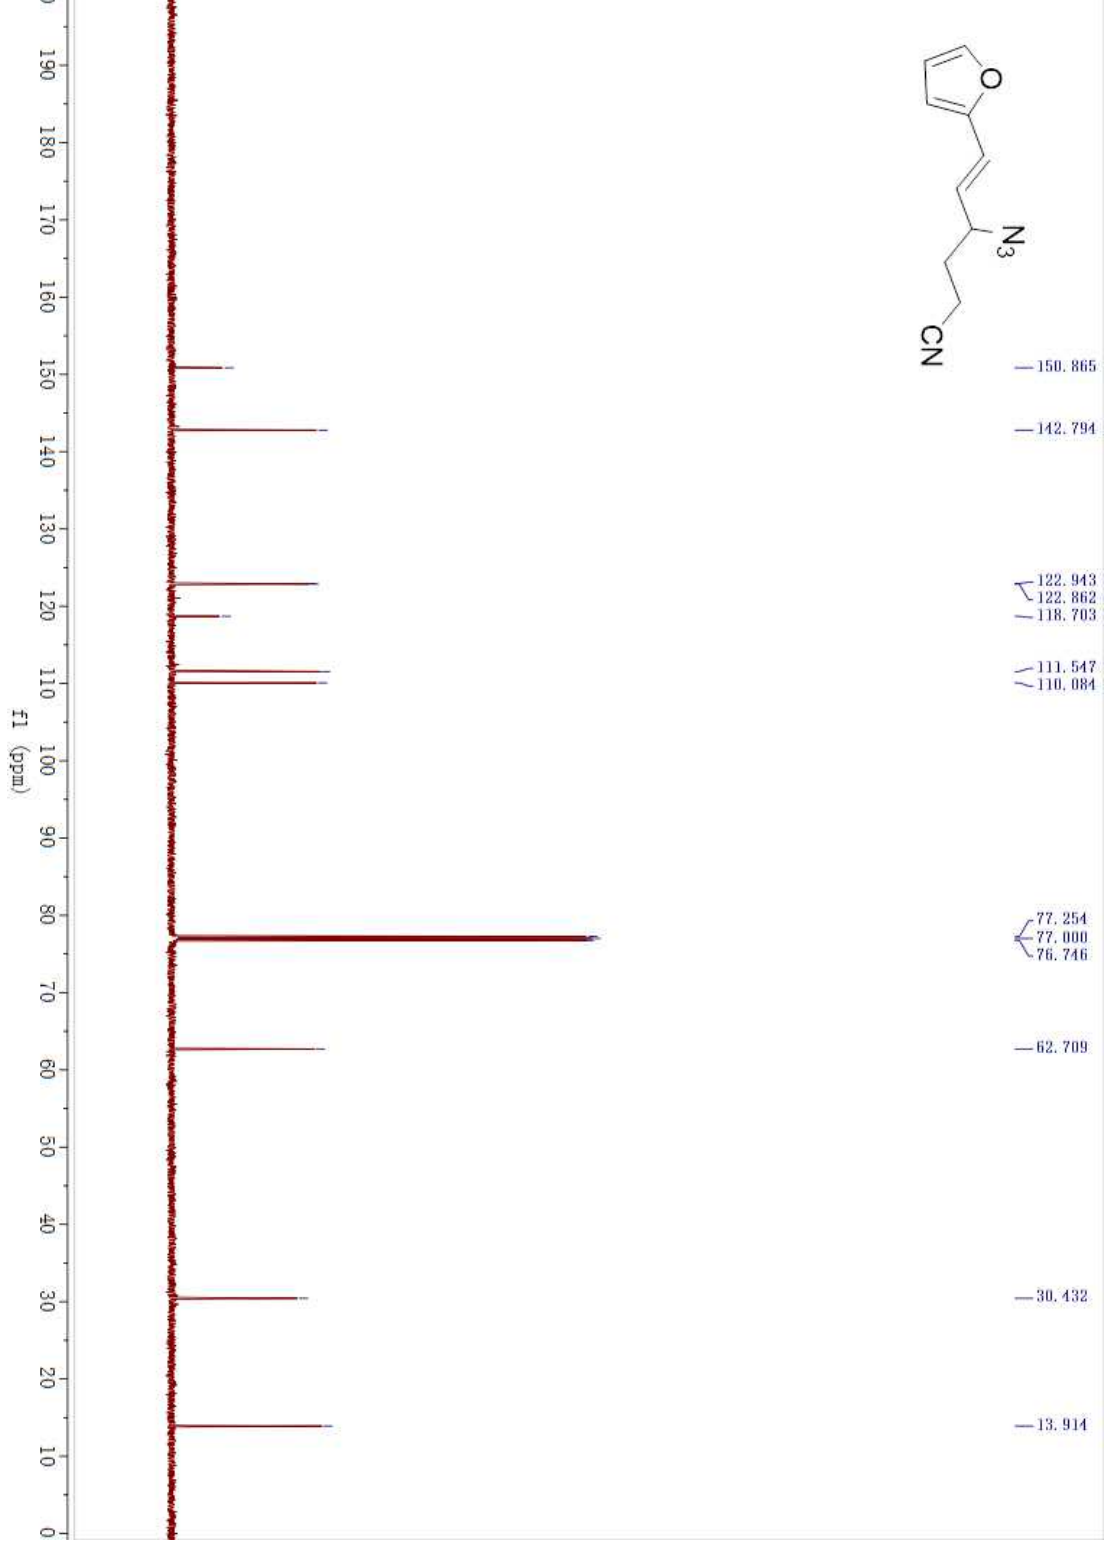

**(E)-4-azido-5-methy**

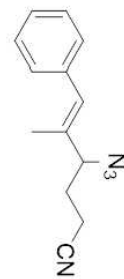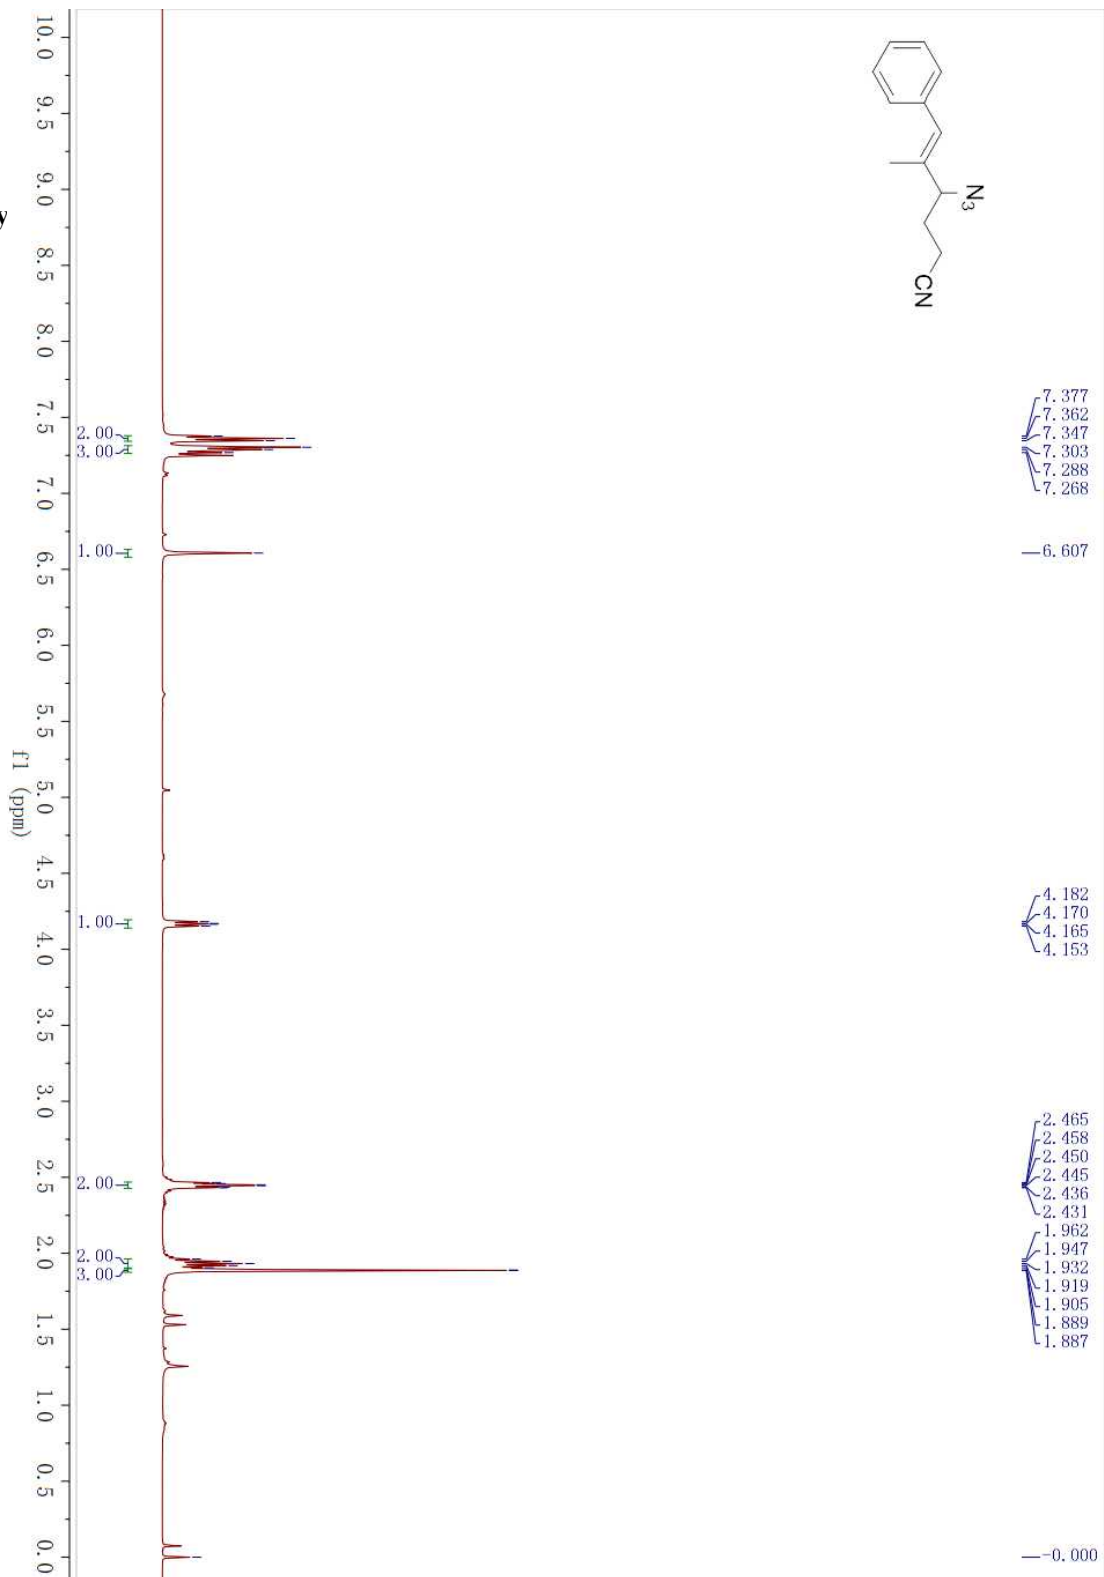

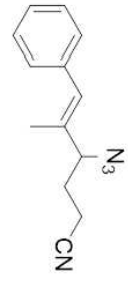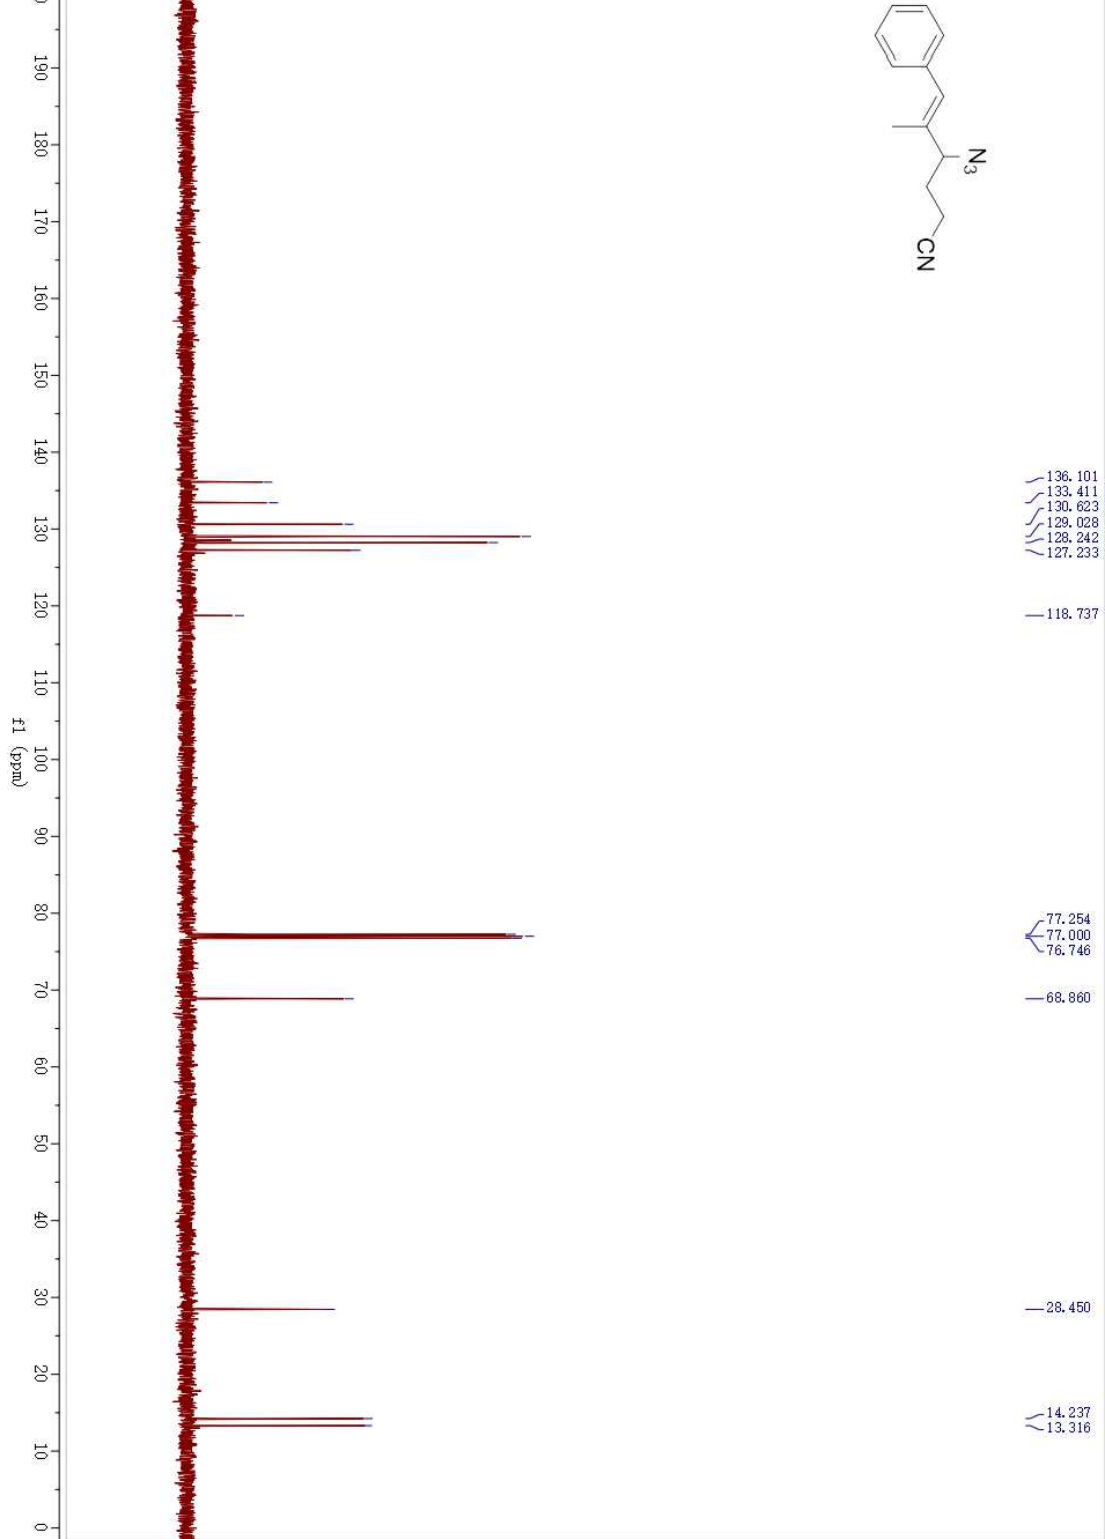

**(E)-4-azido-5-ben**

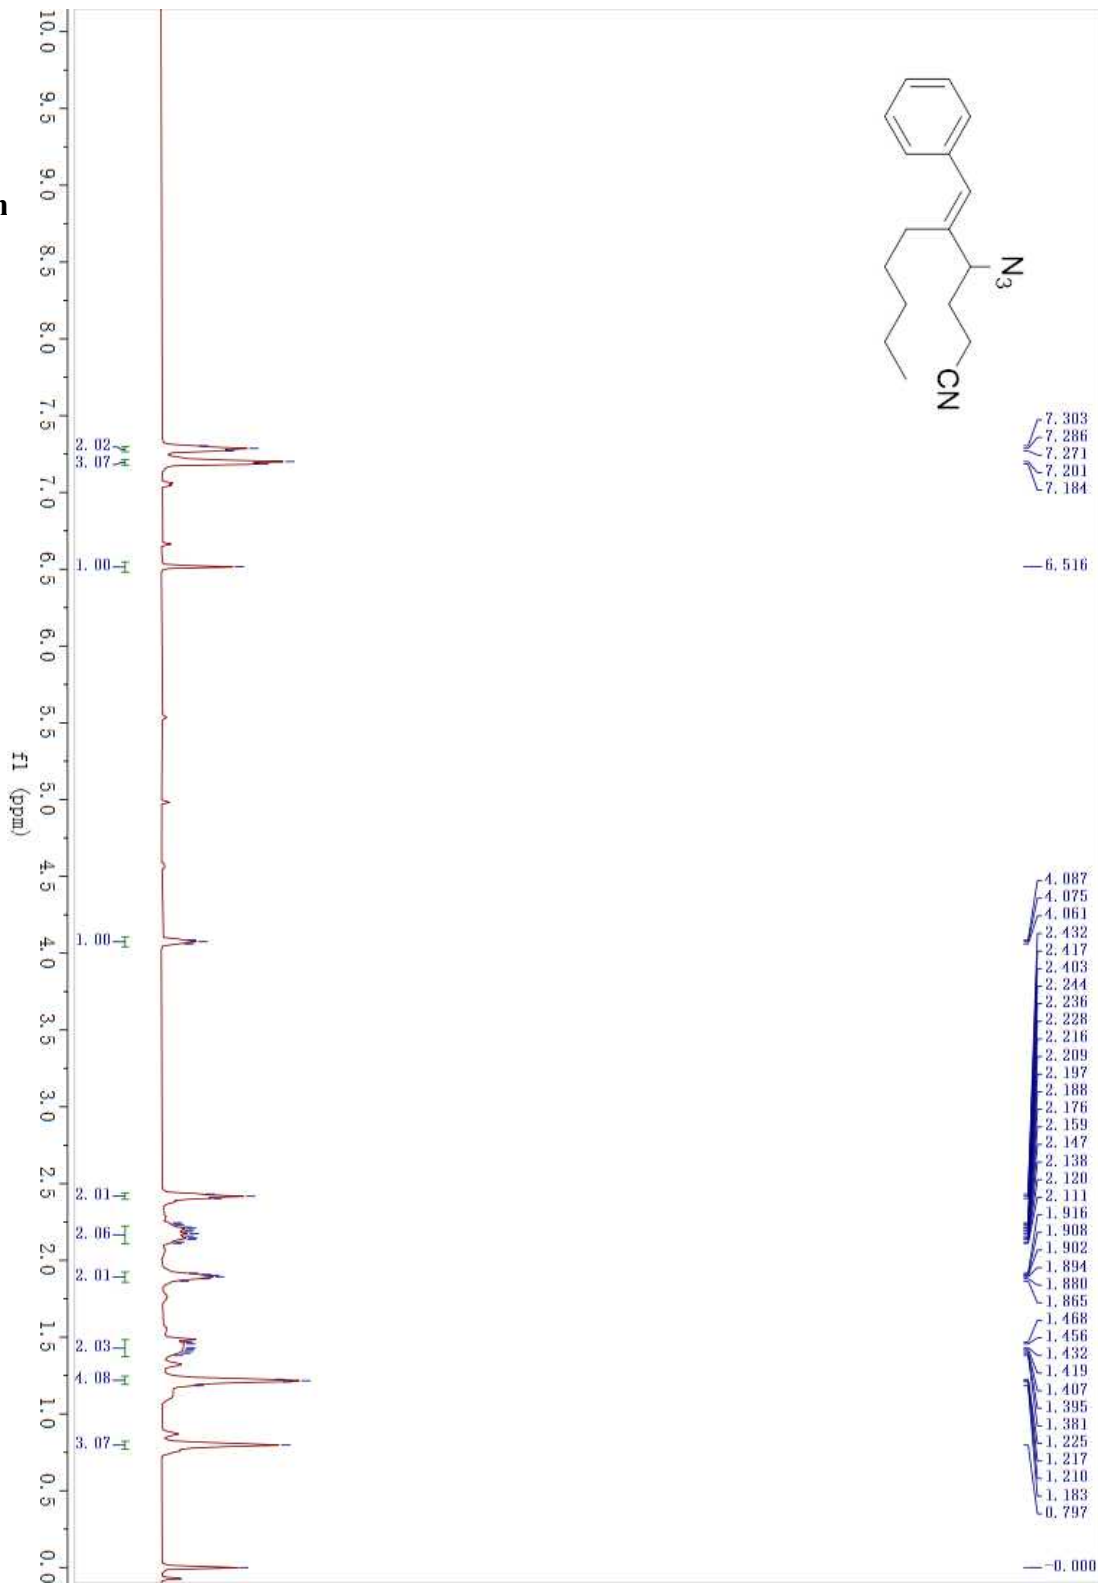

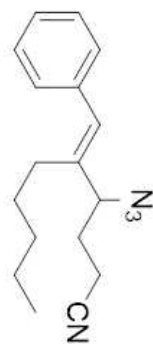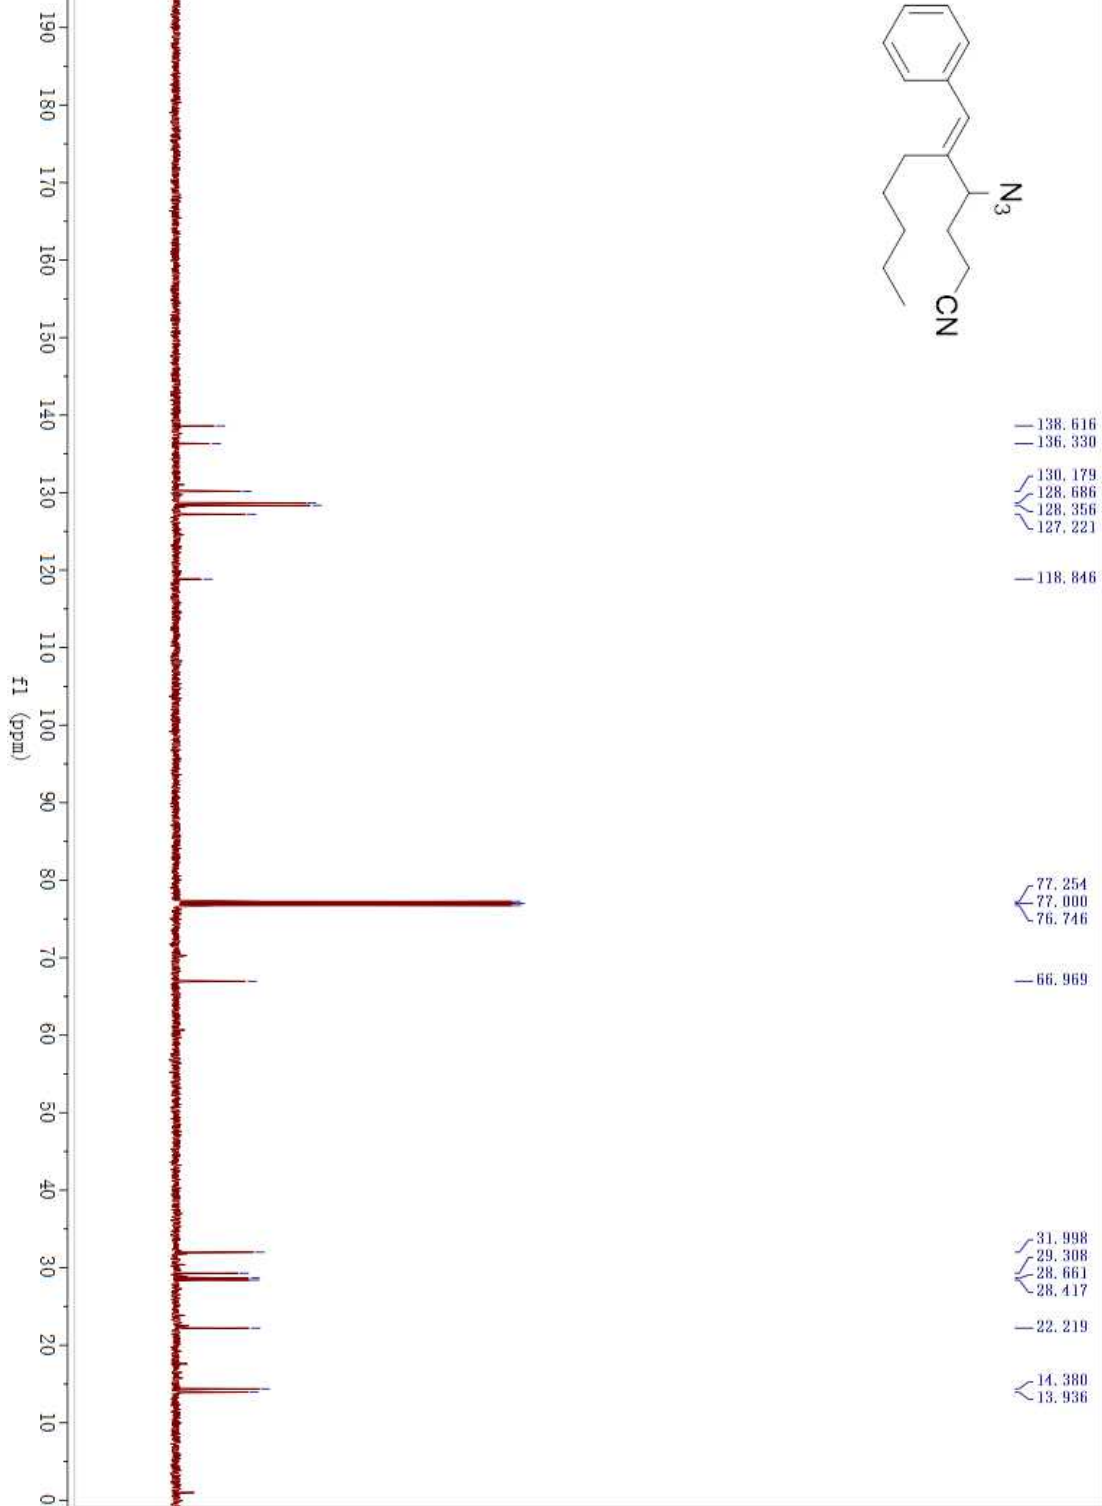

**(E)-4-azido-5-ben**

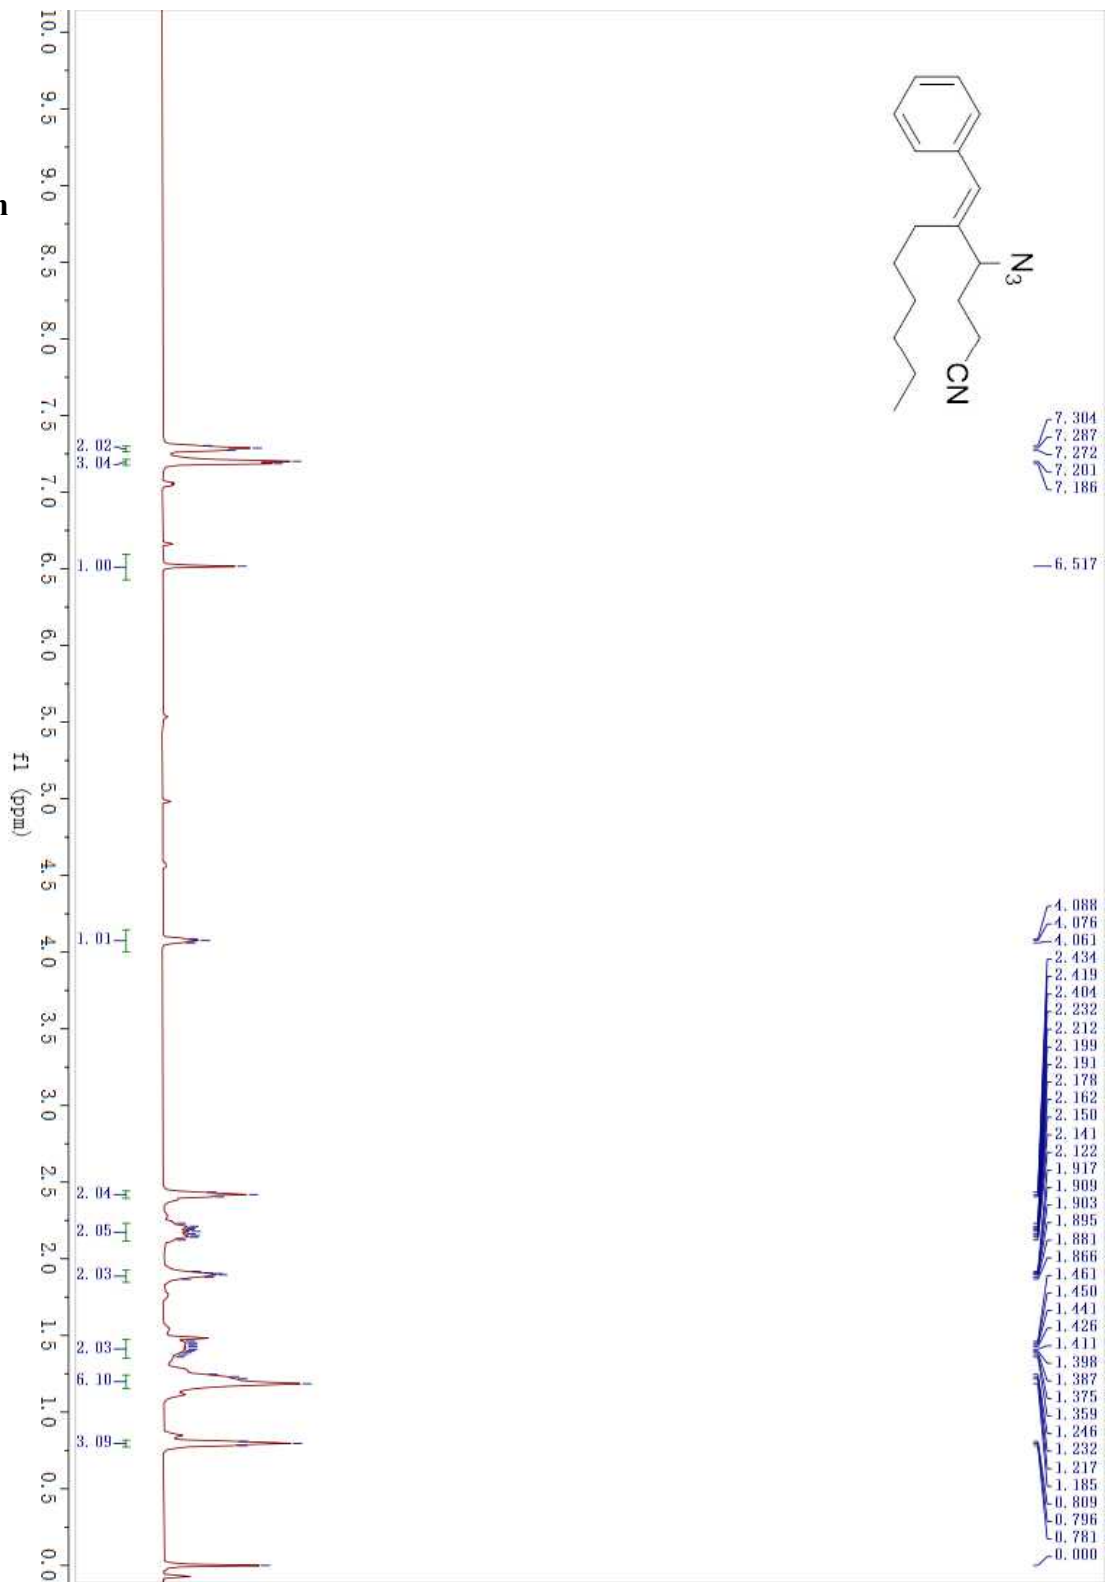



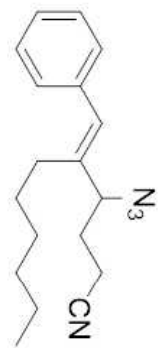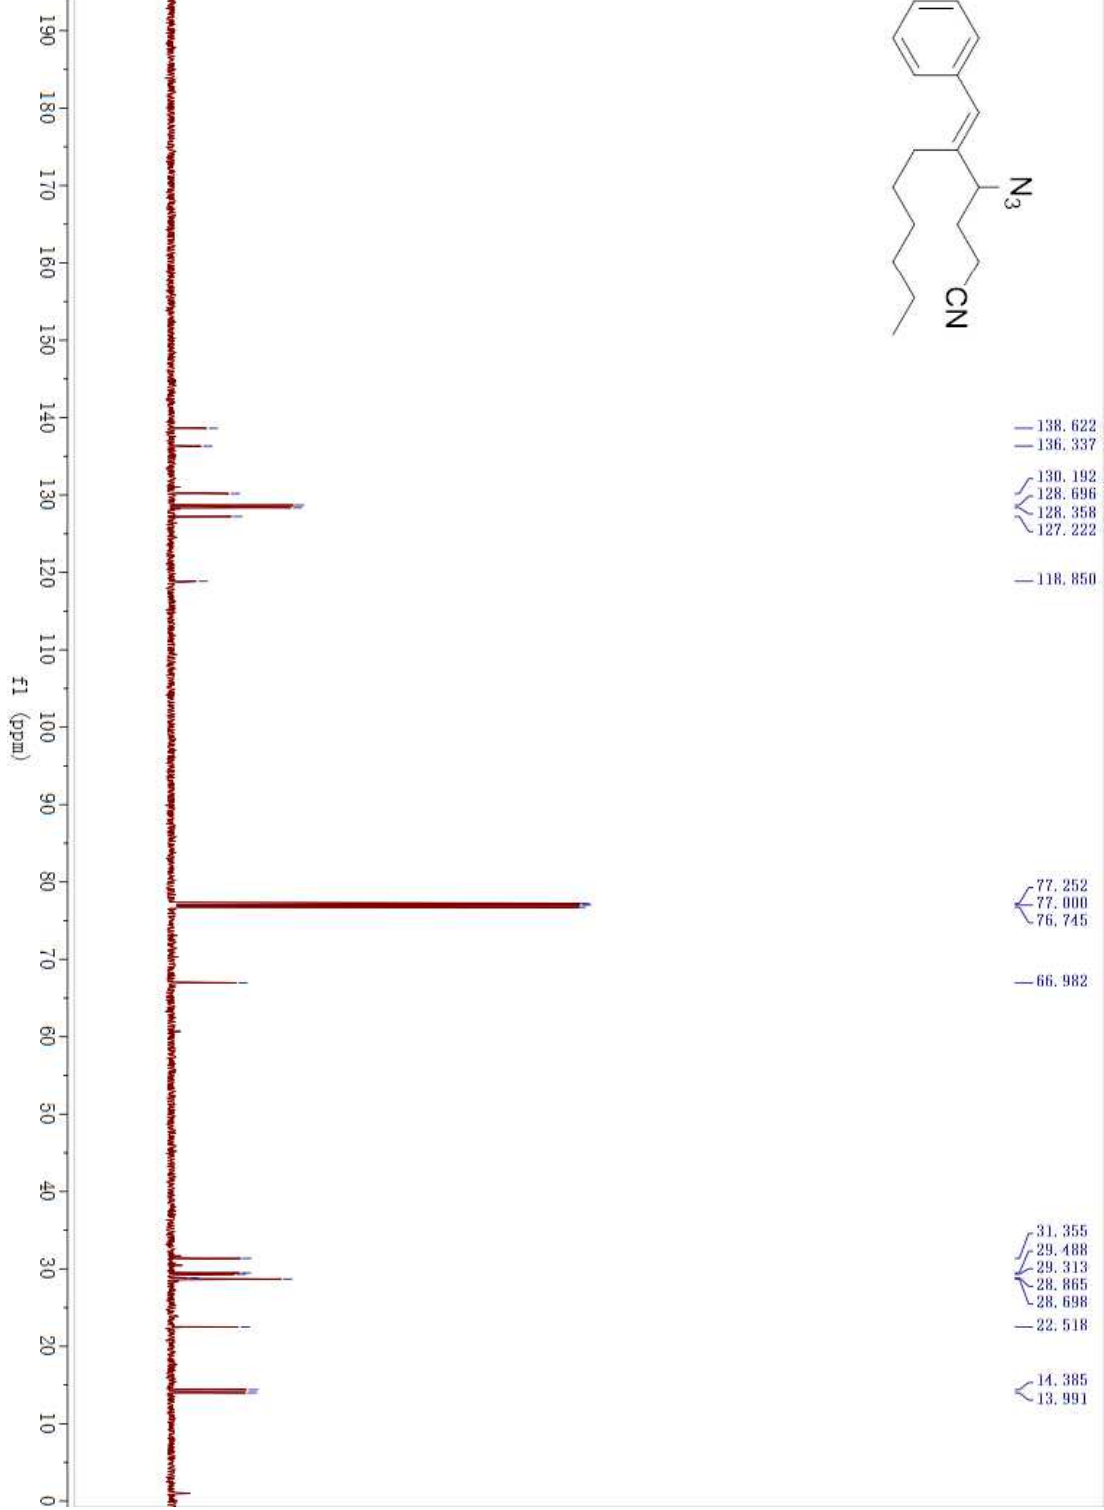

4-azido-6,6-diphe

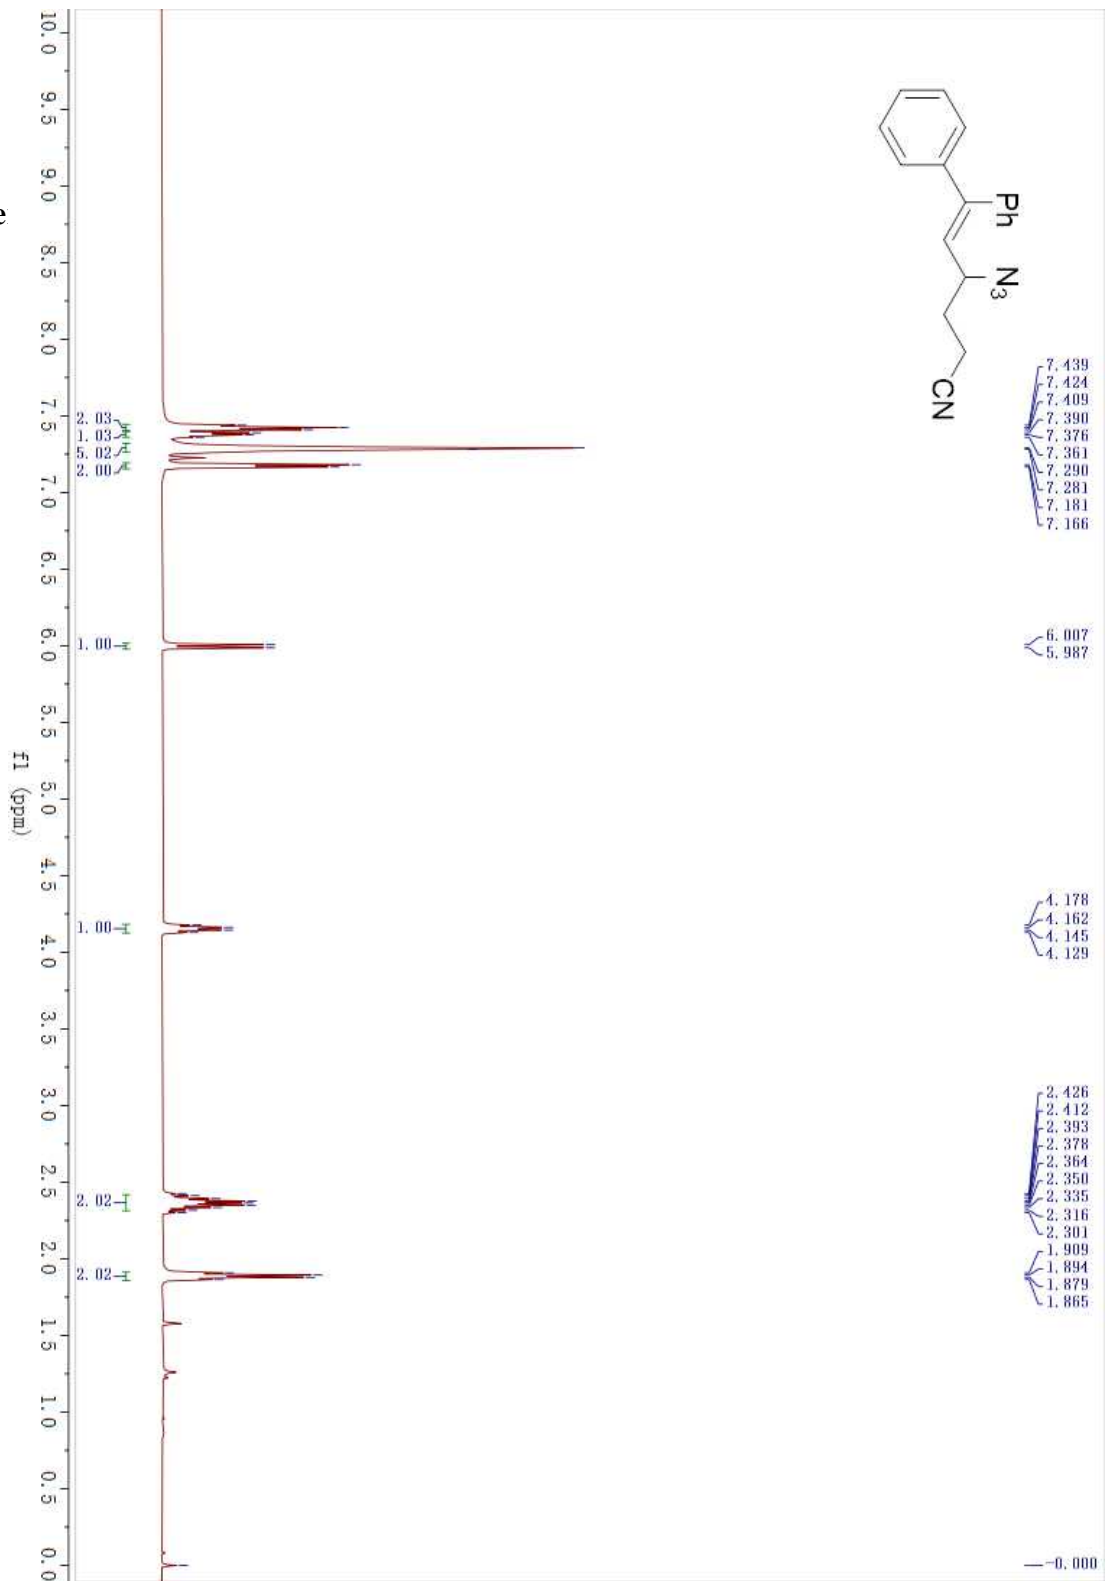

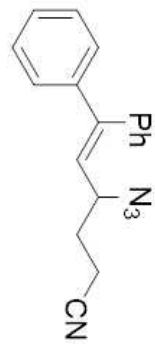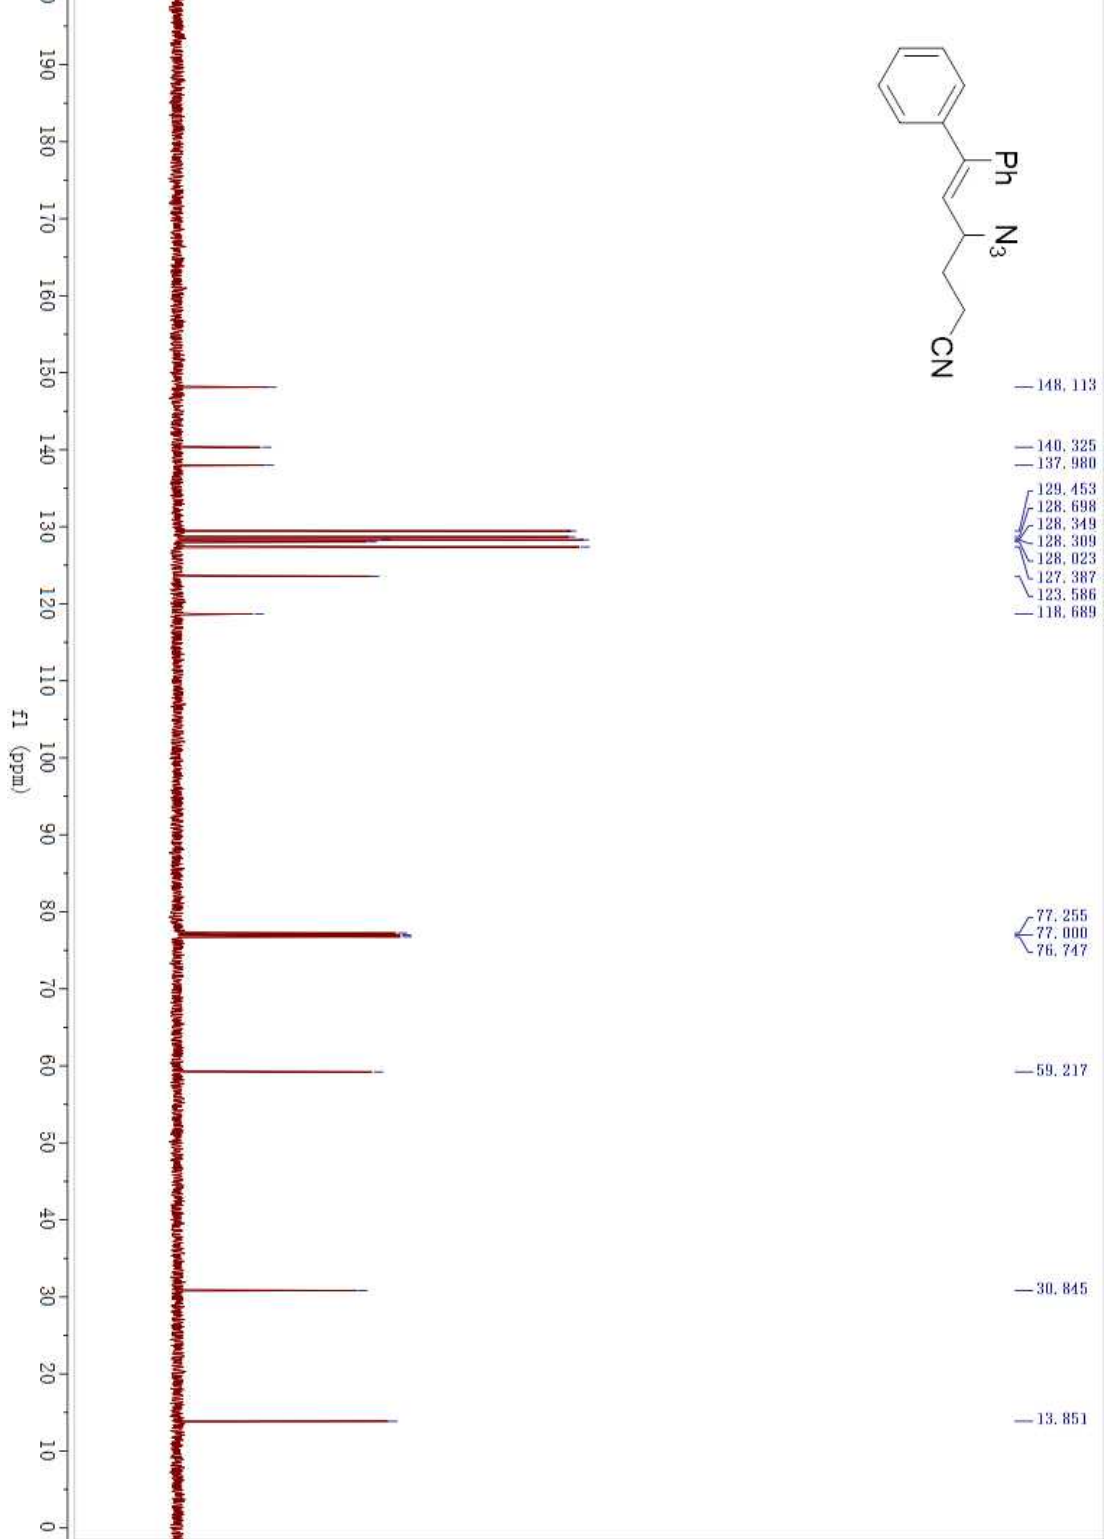

**(E)-4-azido-6-cycl**

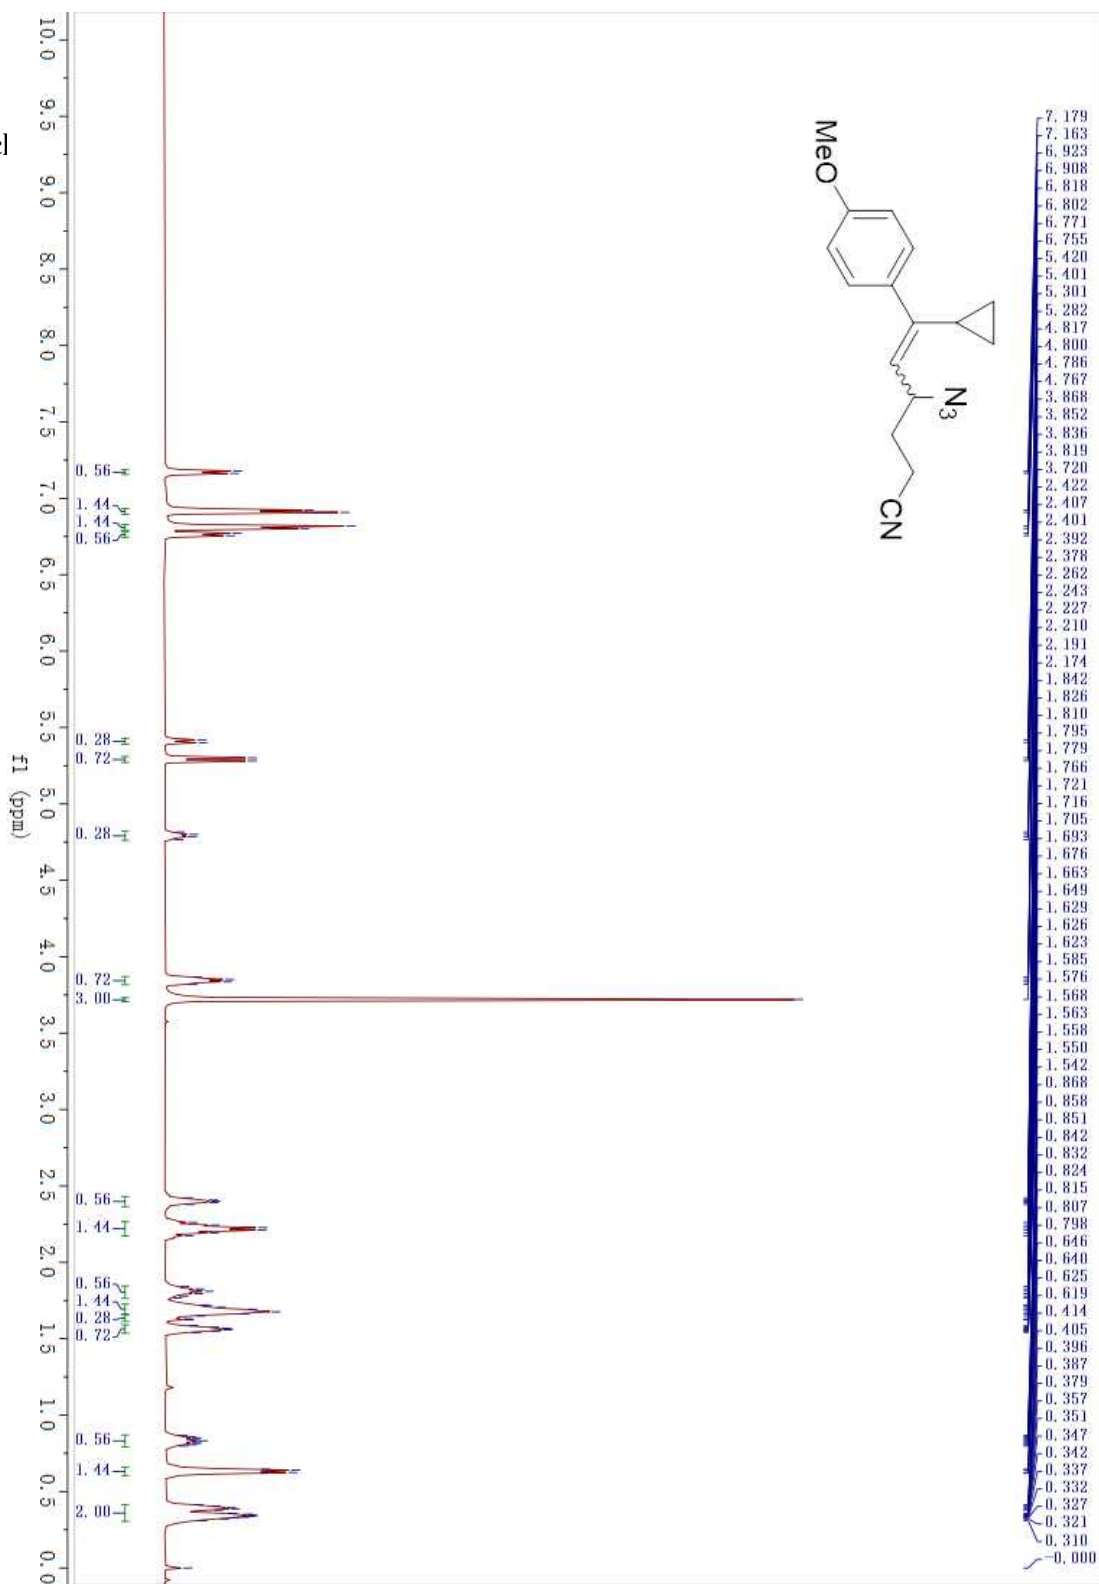

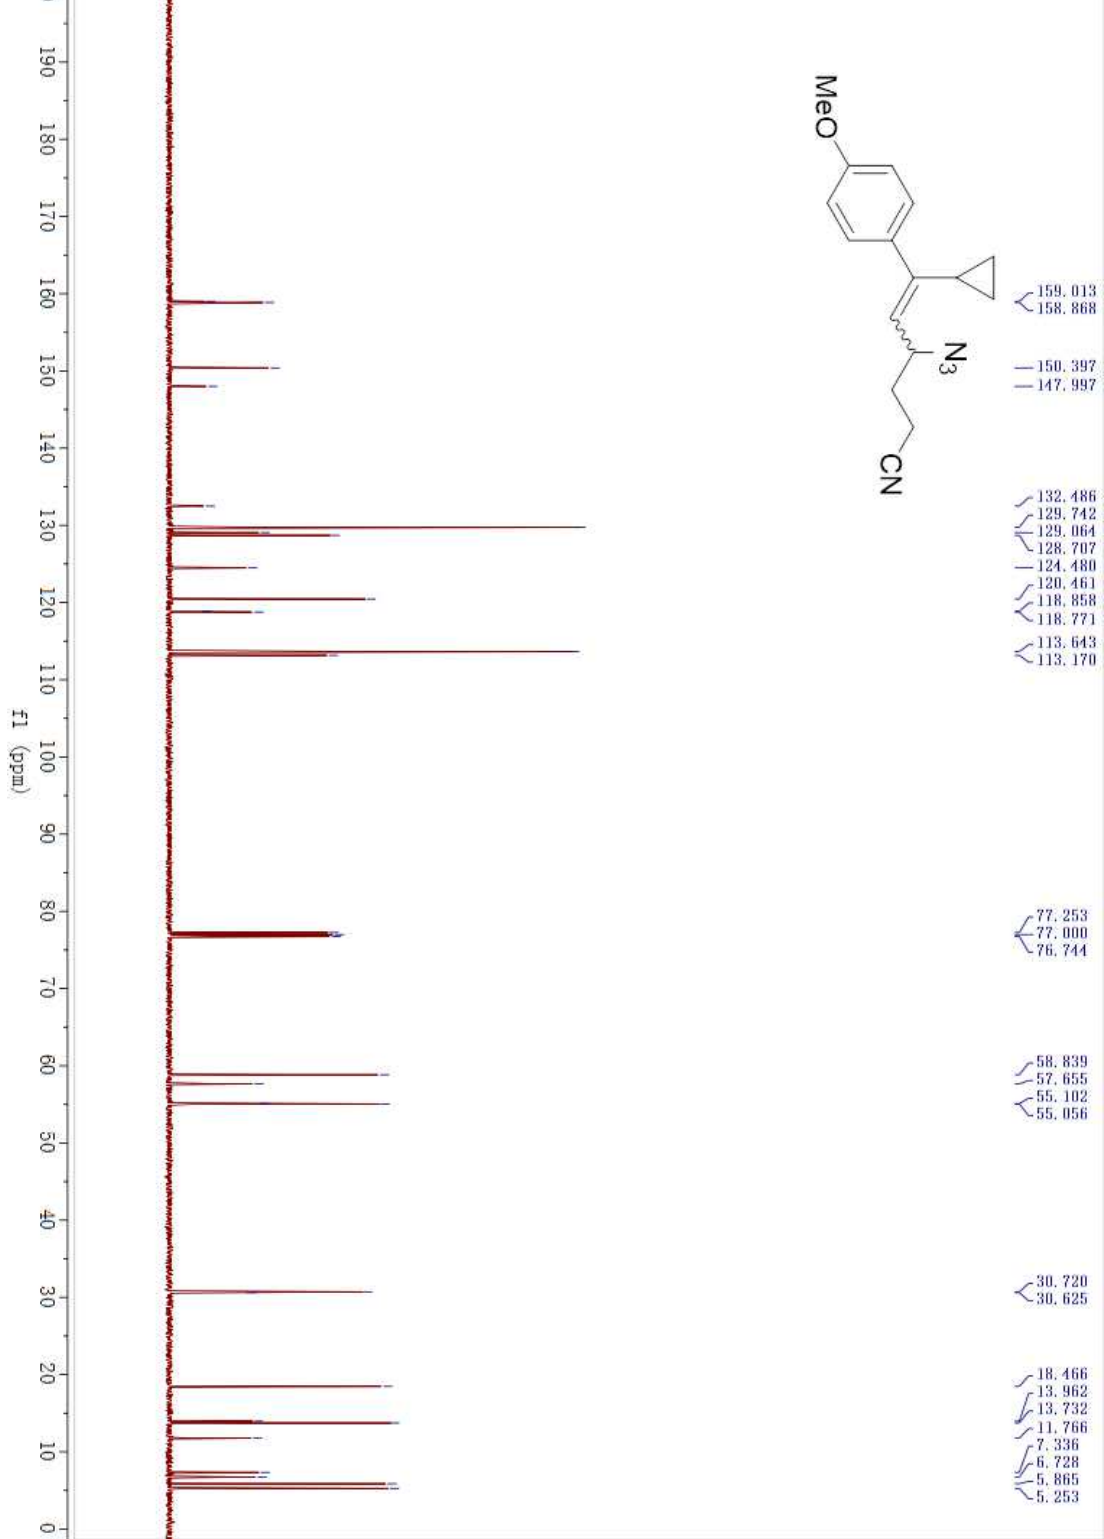

4-azido-4-(4-meth

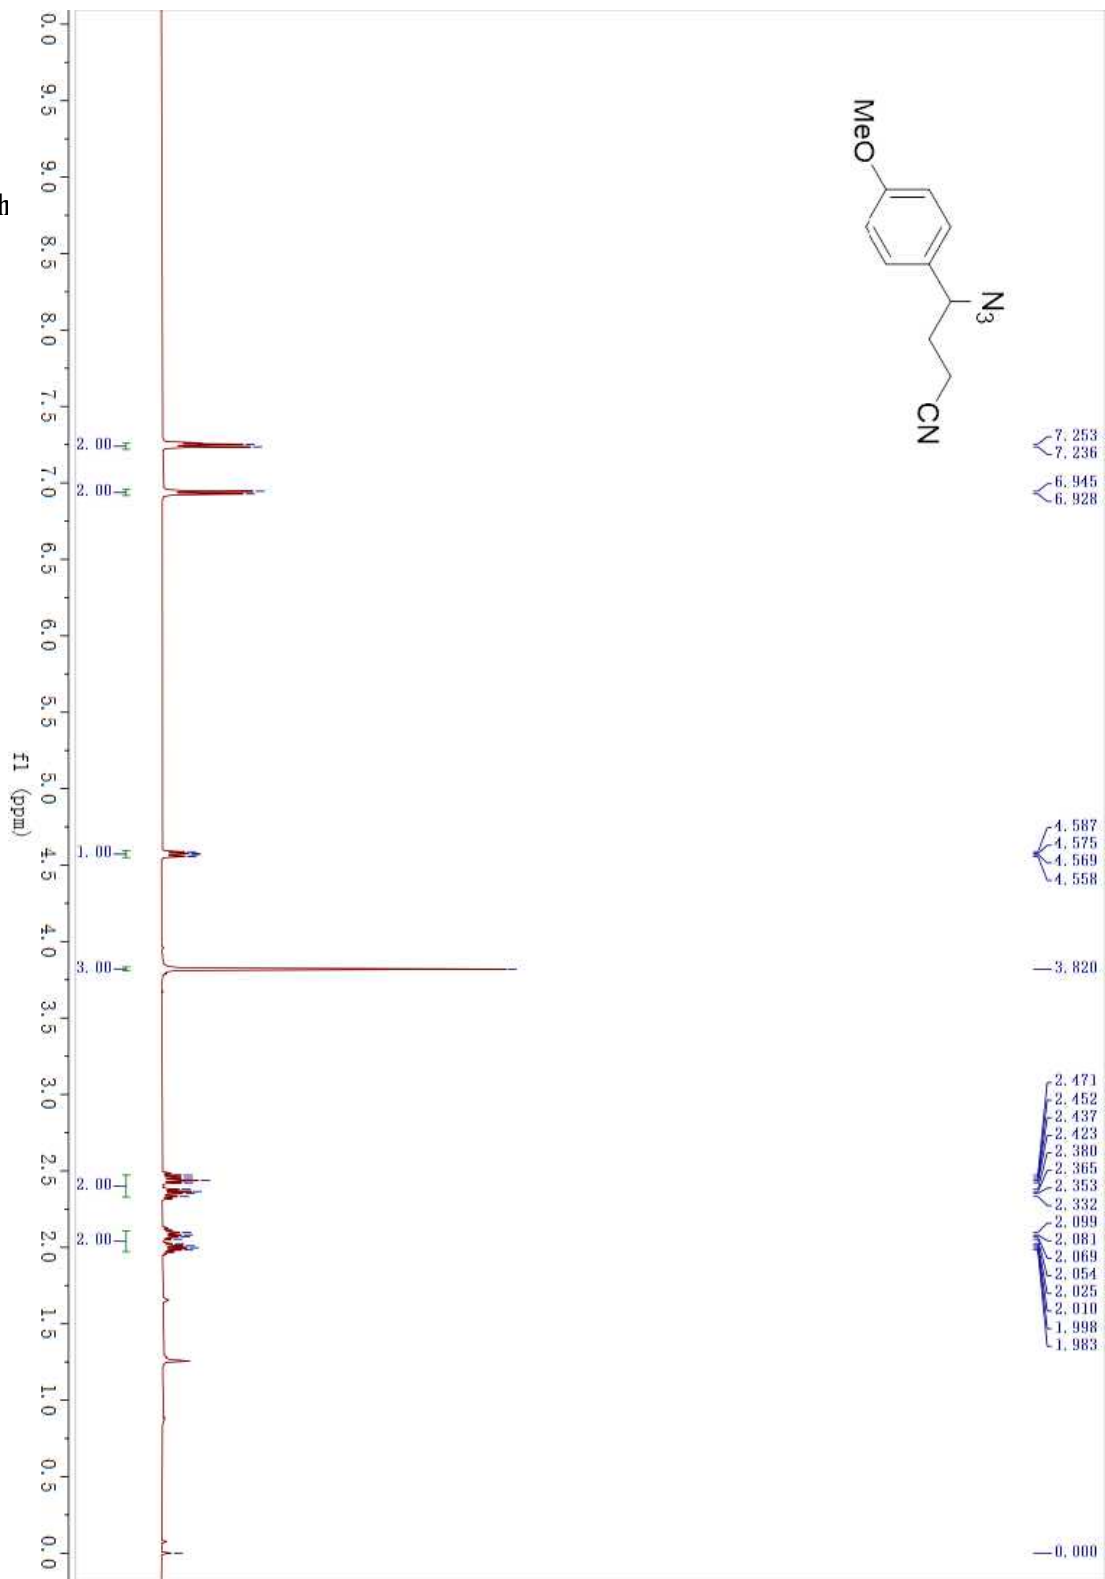

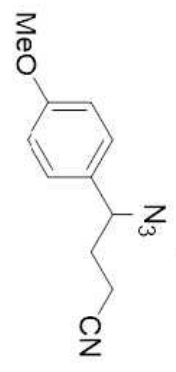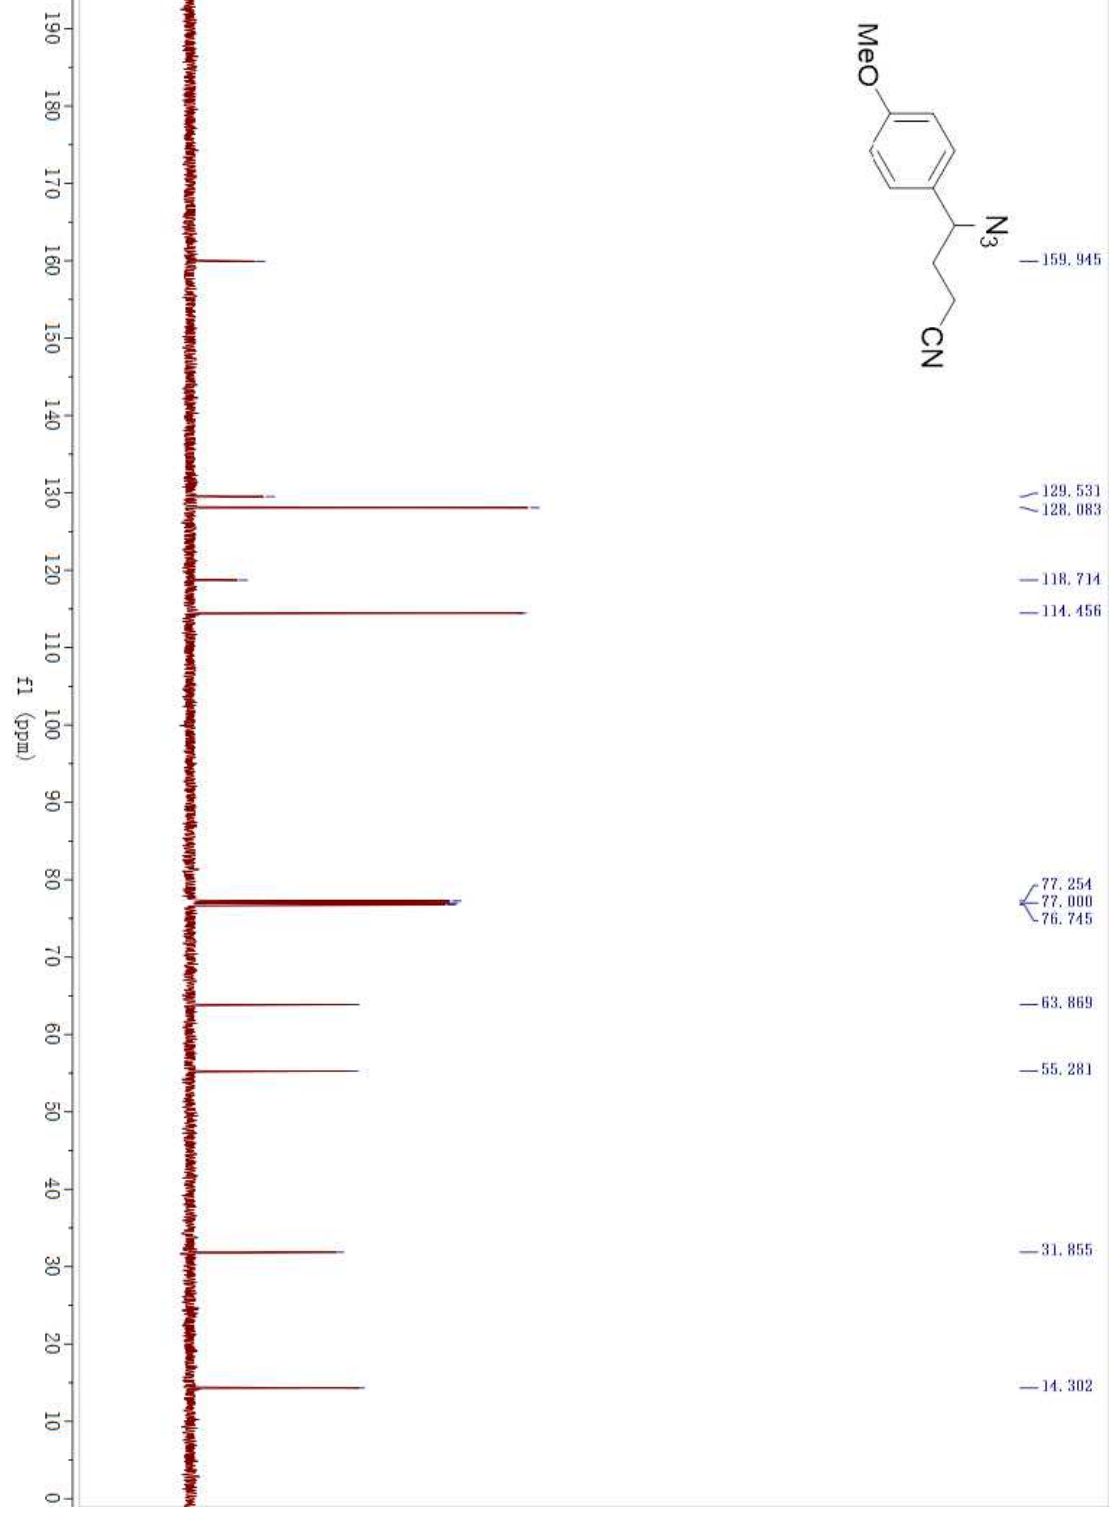

4-azido-4-(3-meth

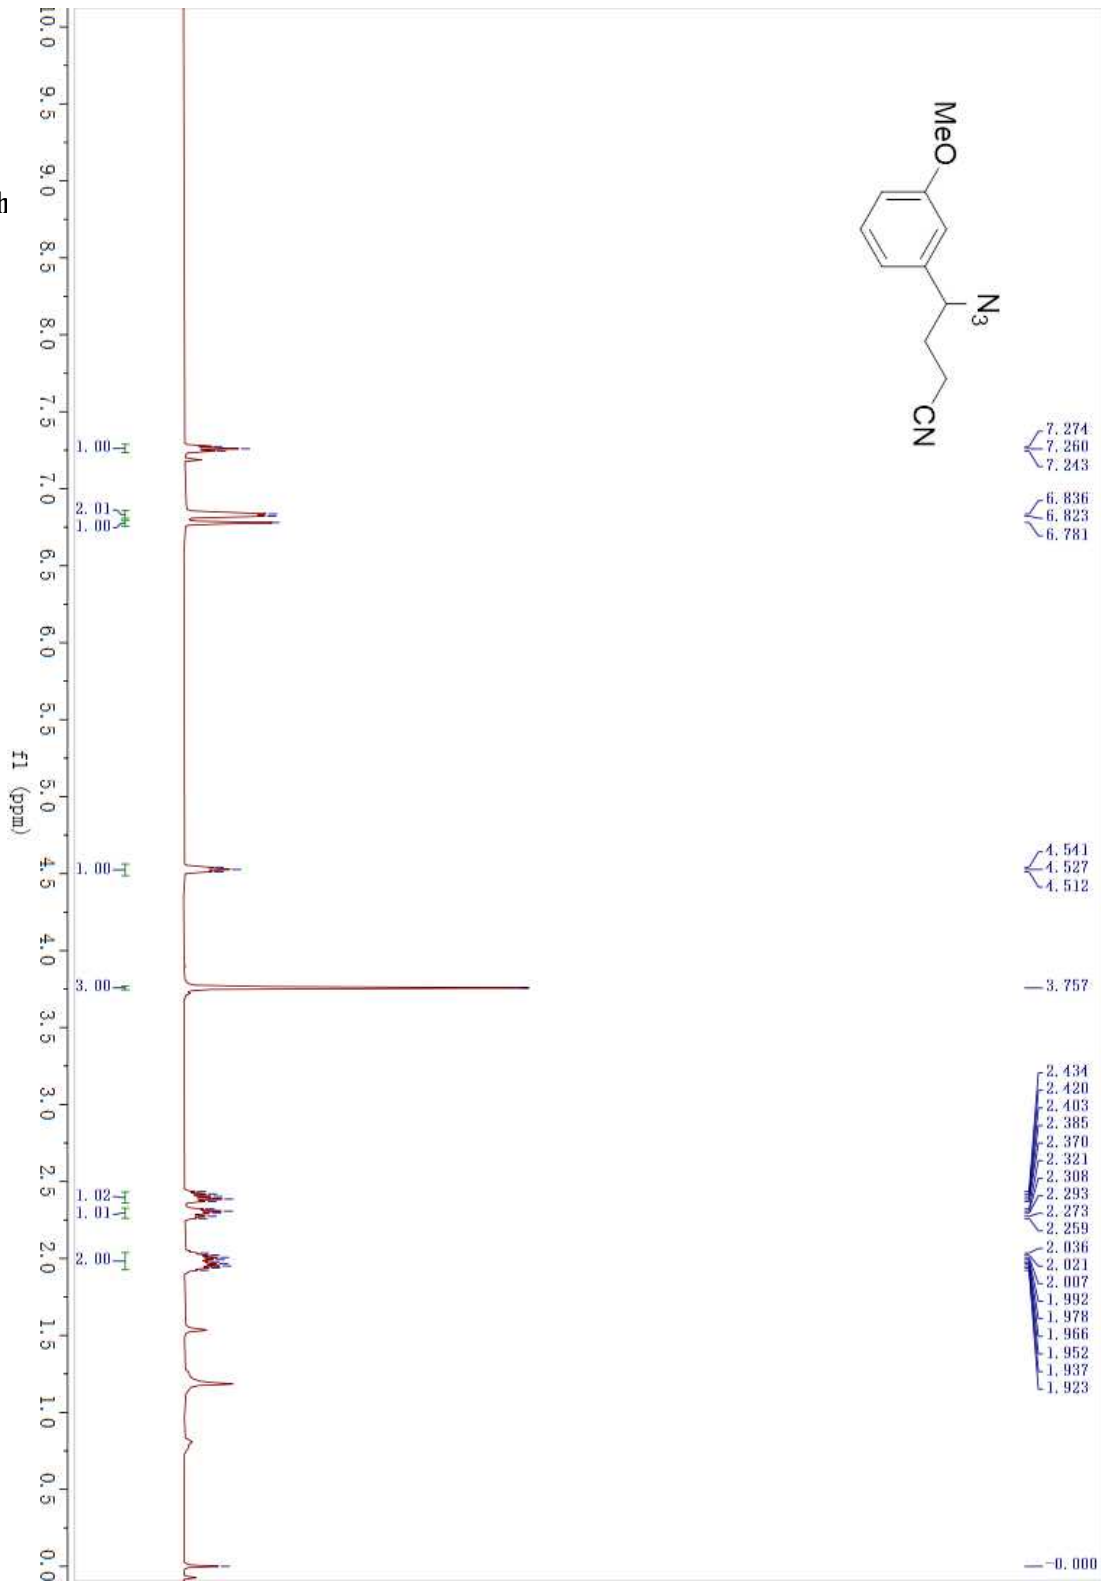



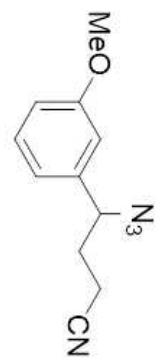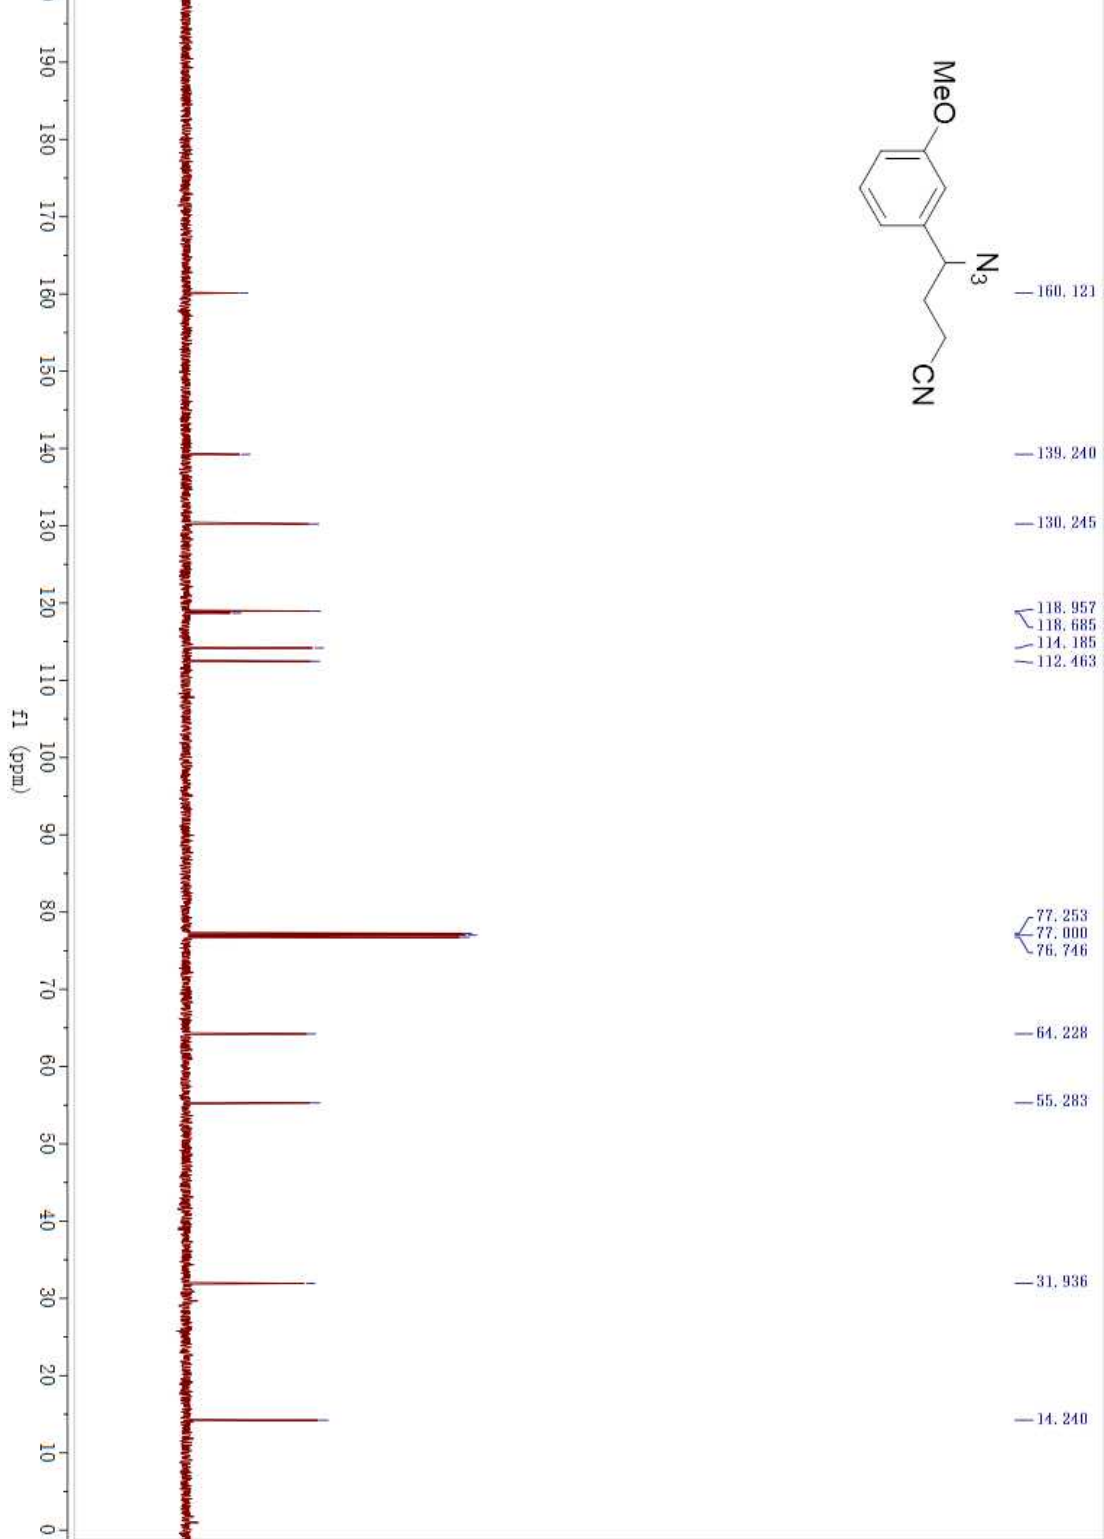

# 4-azido-4-(4-phen

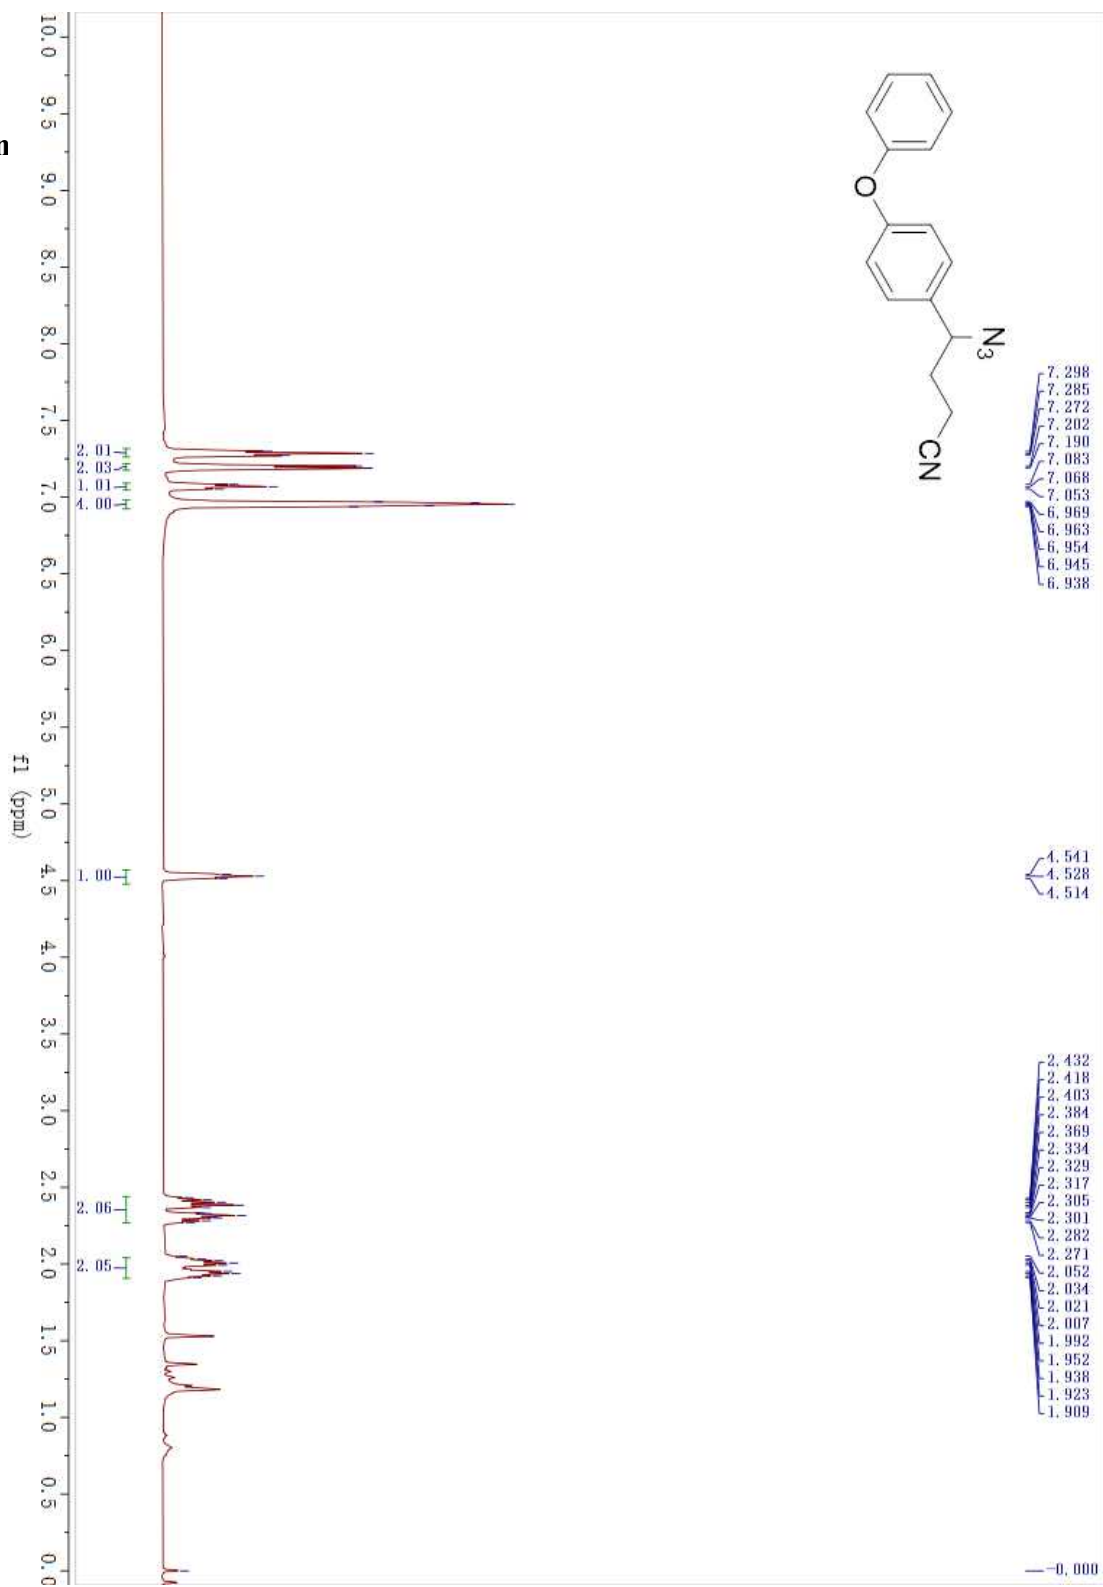

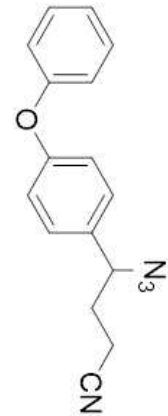

- 158.014
- 156.383
- 132.082
- 129.856
- 128.256
- 123.831
- 119.363
- 118.850
- 118.634
- 77.254
- 77.000
- 76.745
- 63.797
- 31.932
- 14.283

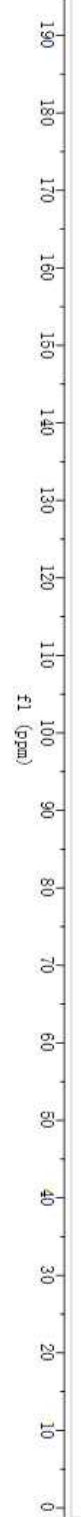

4-azido-4-mesityll

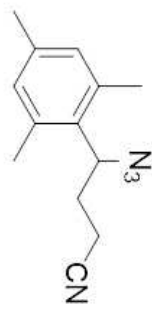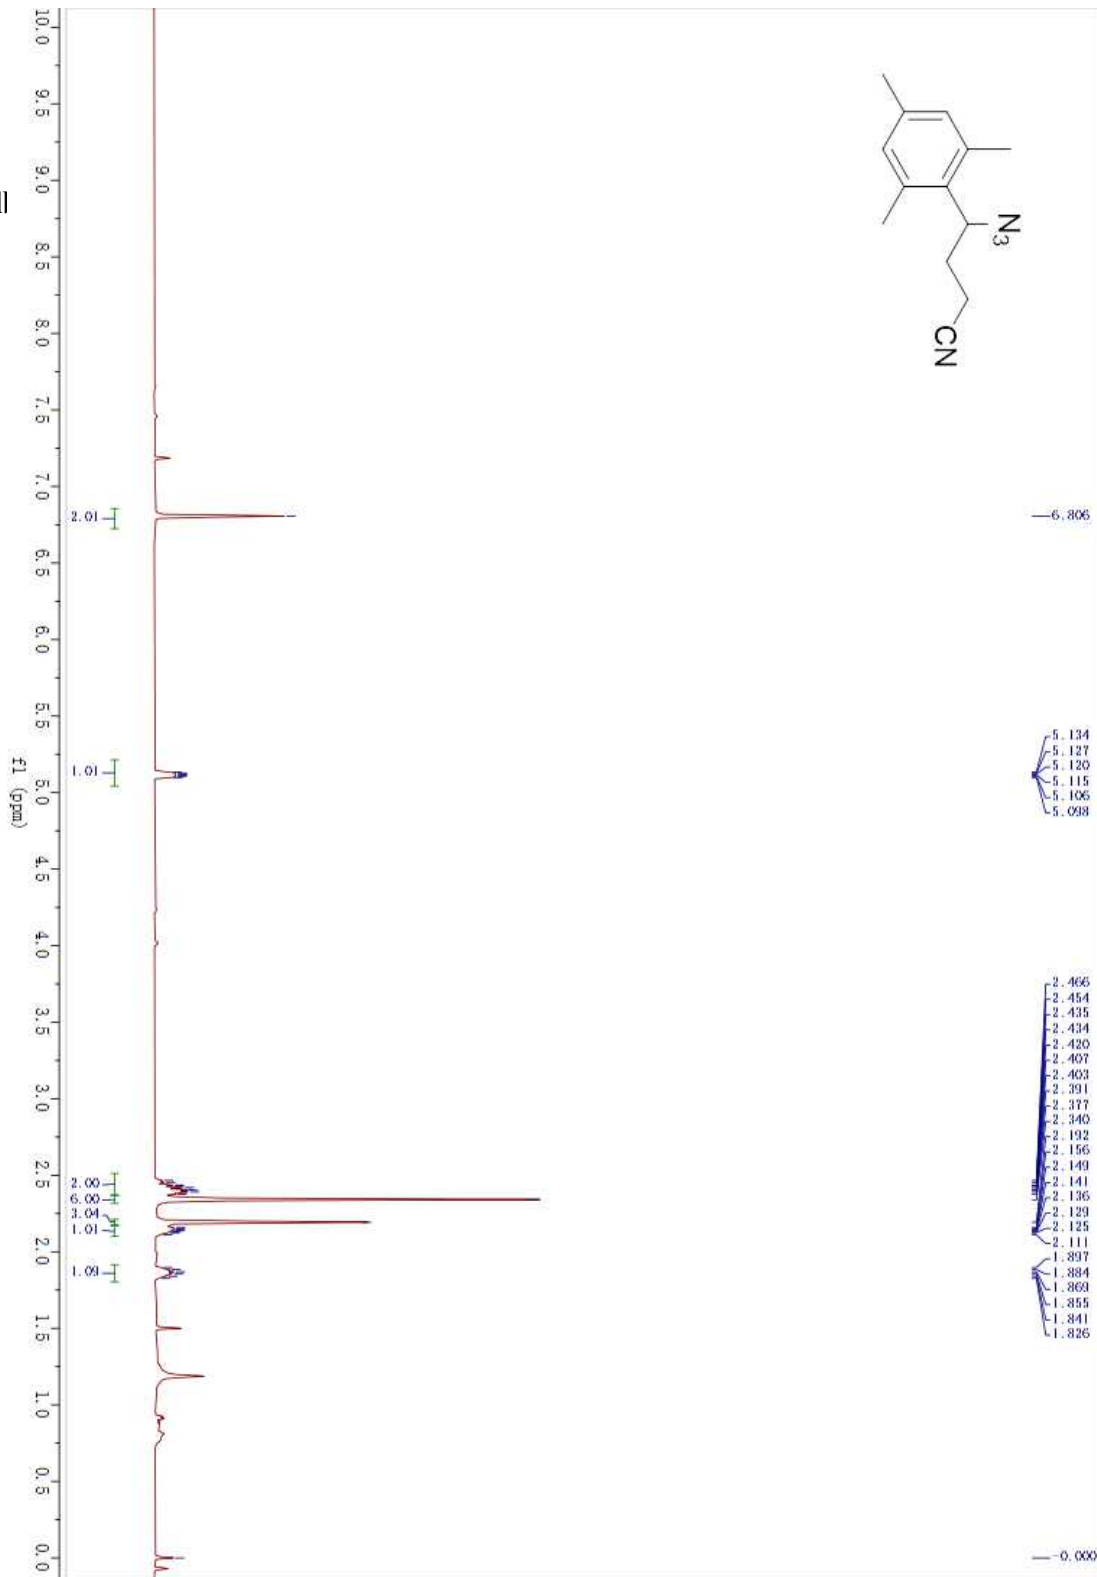

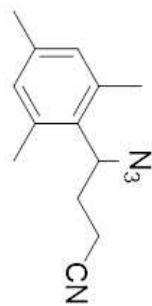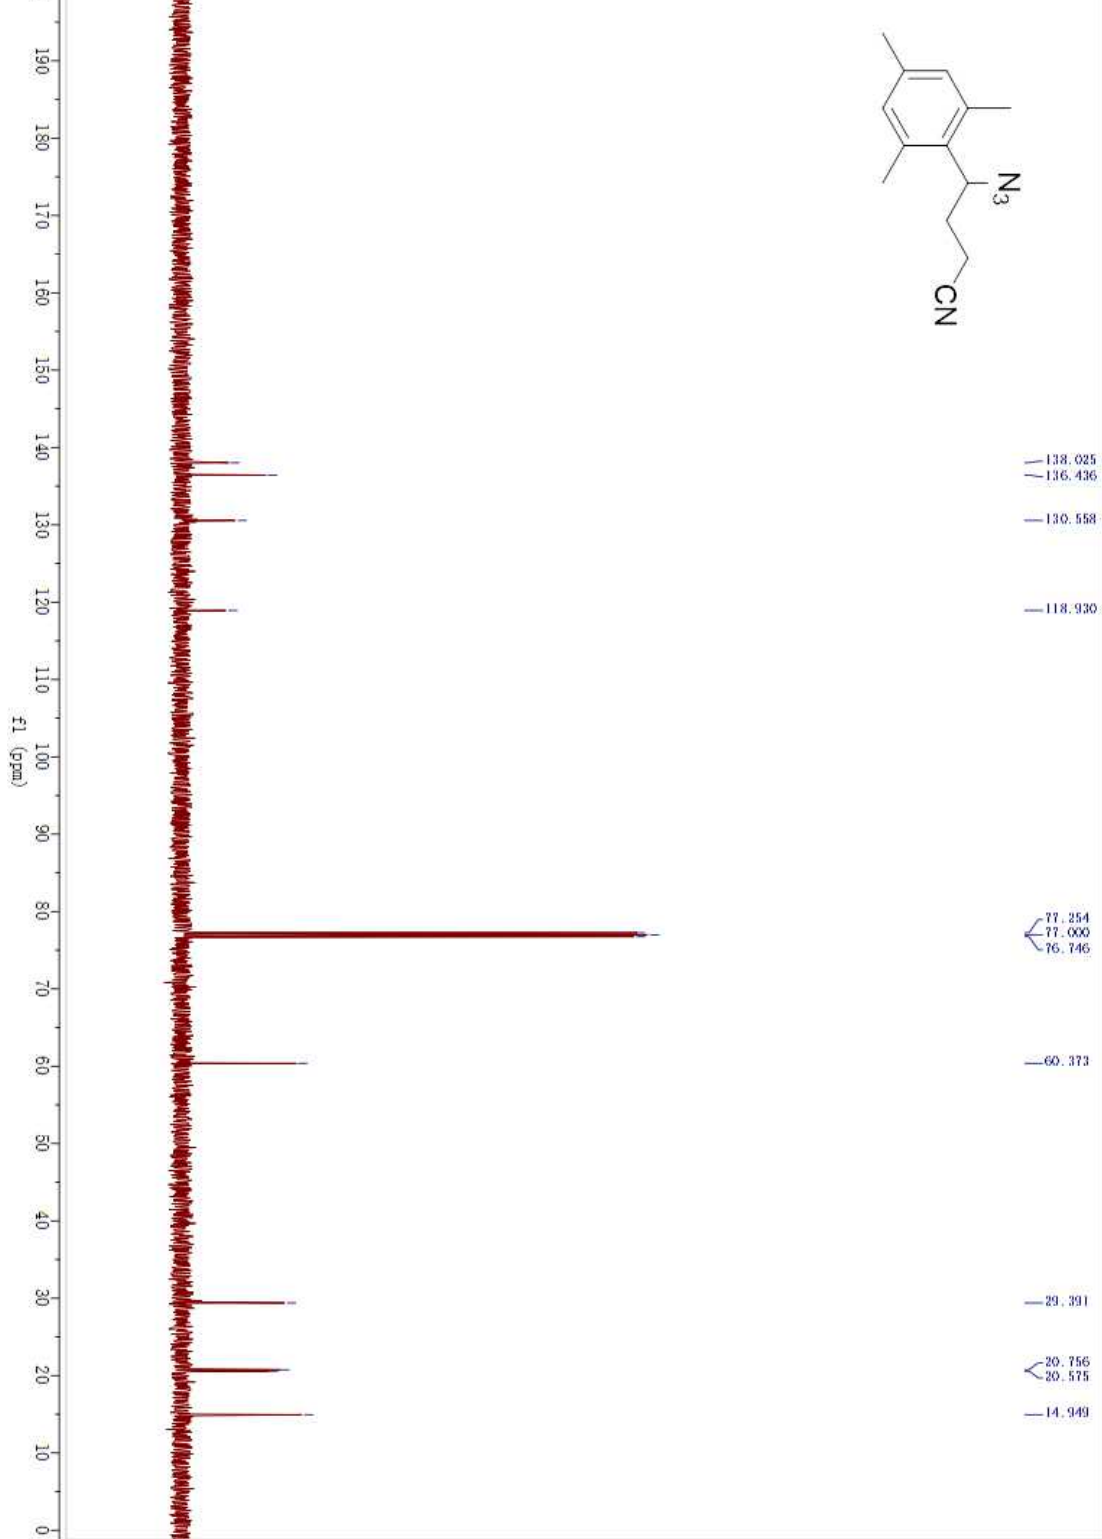

**(E)-6-azido-6-(4-*r***

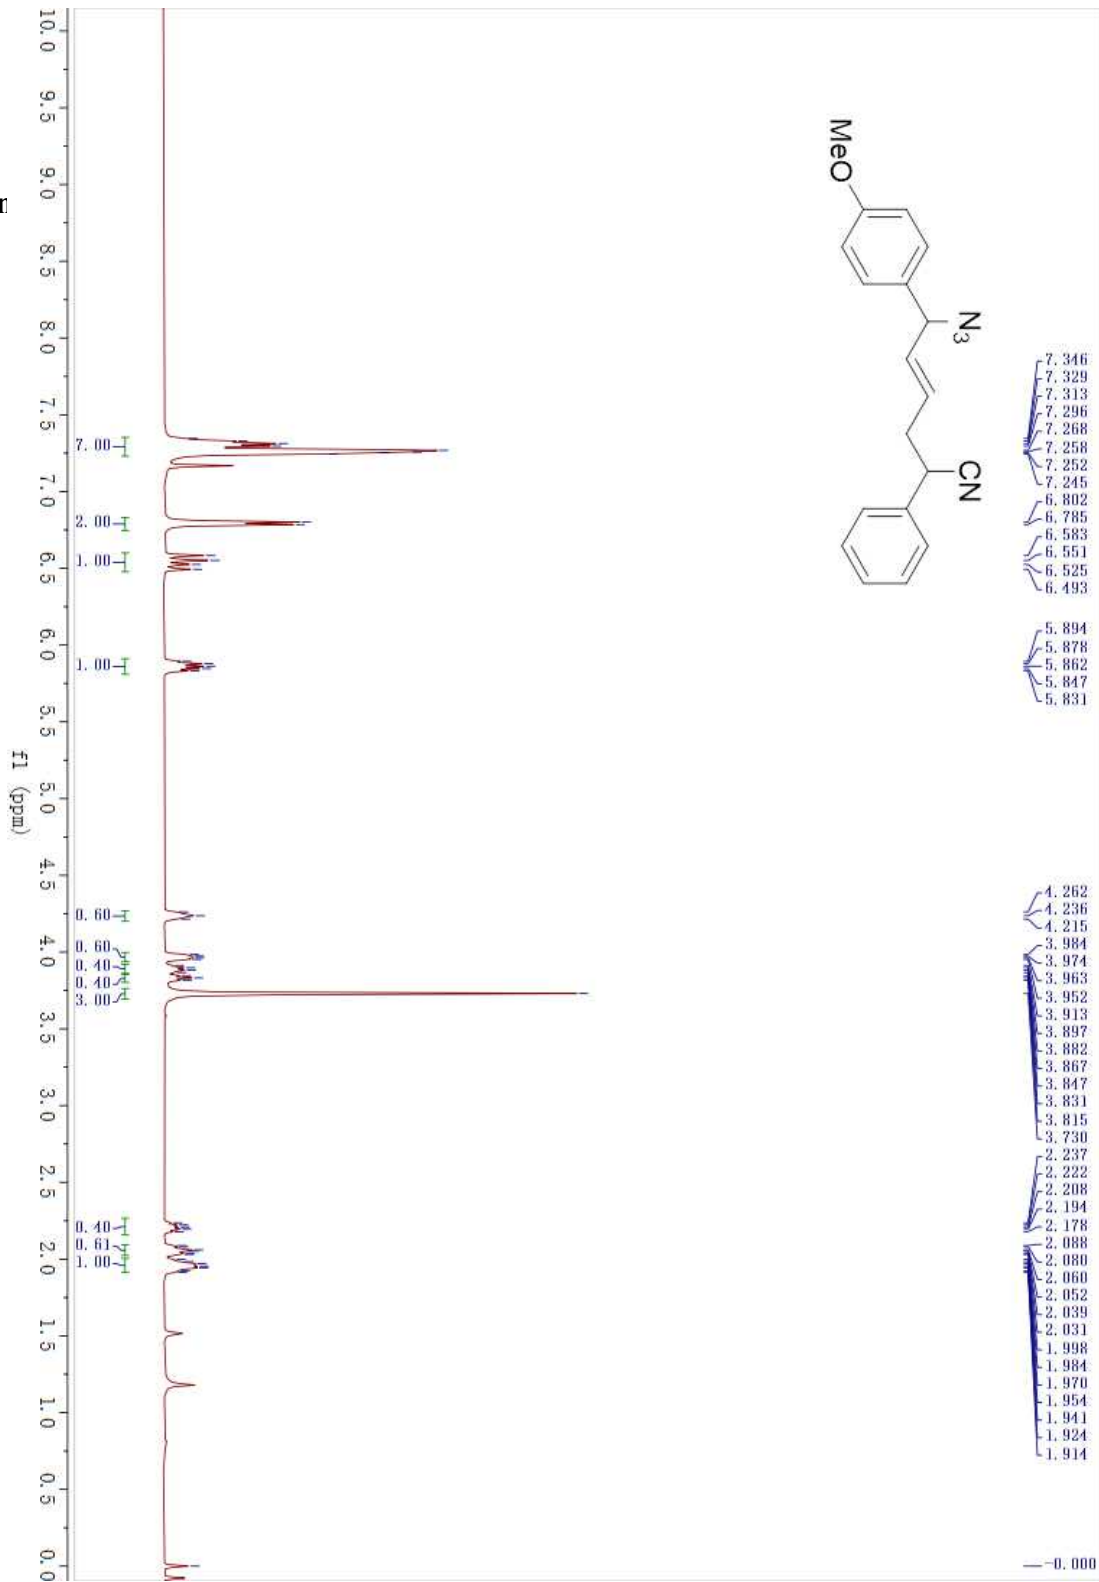

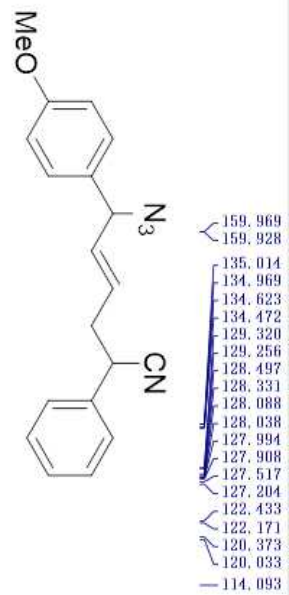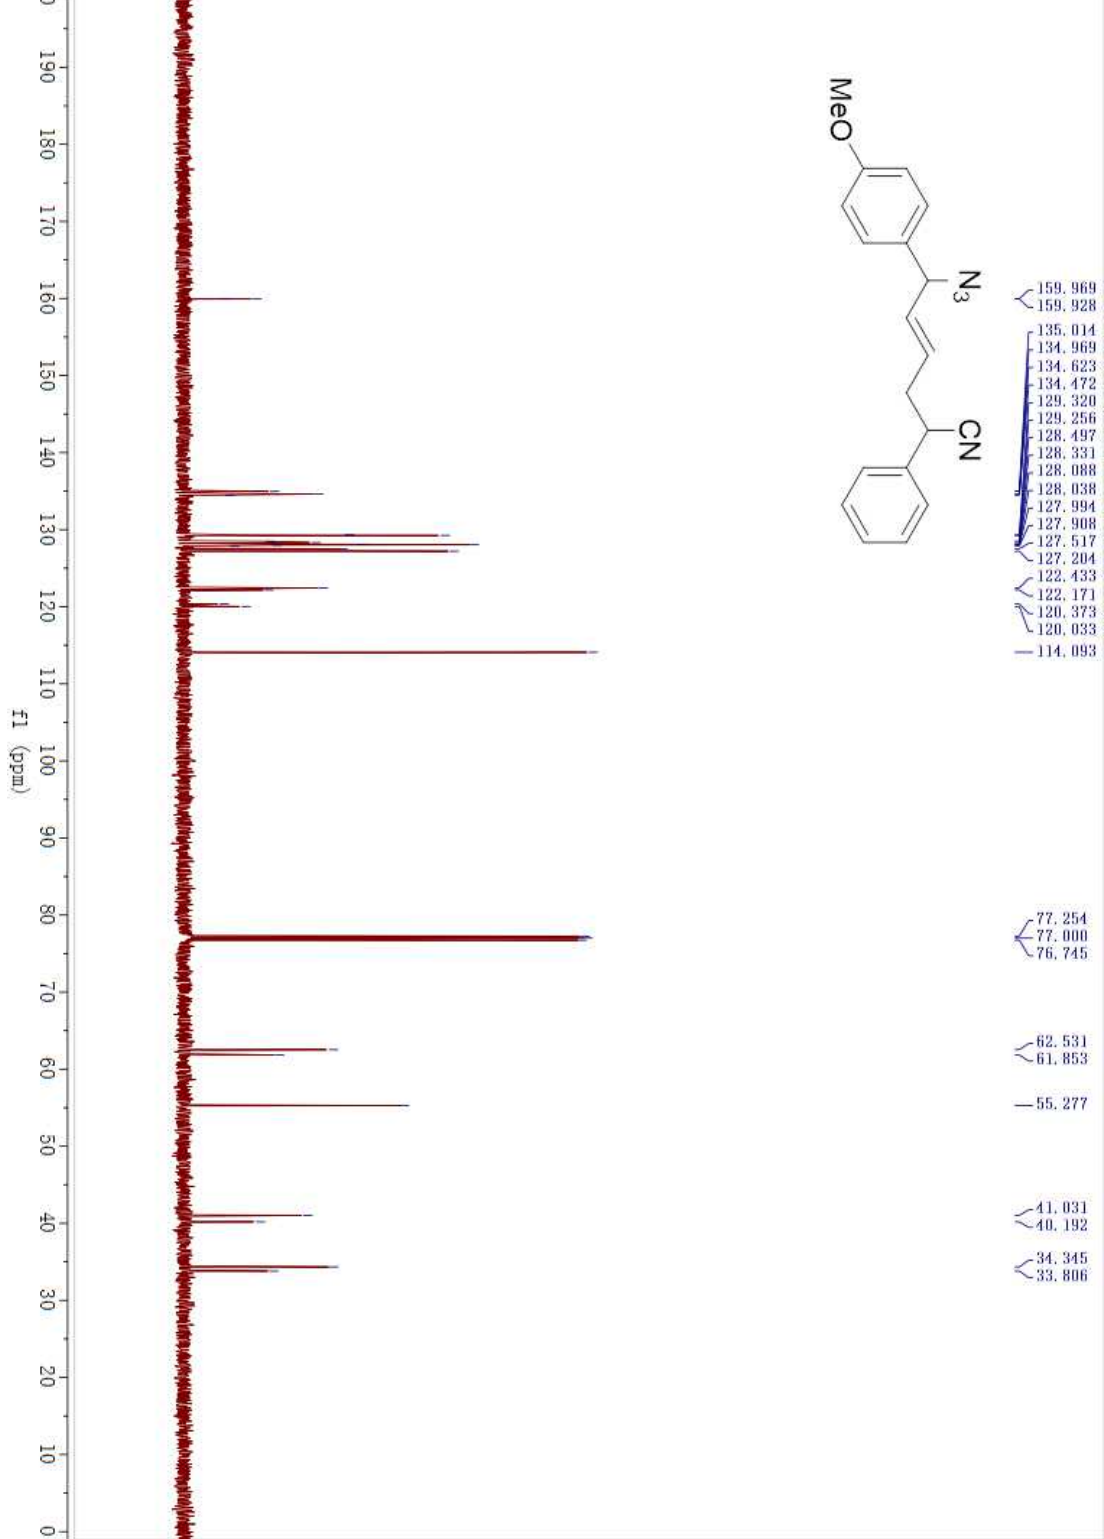

**(E)-6-azido-2,6-bi**

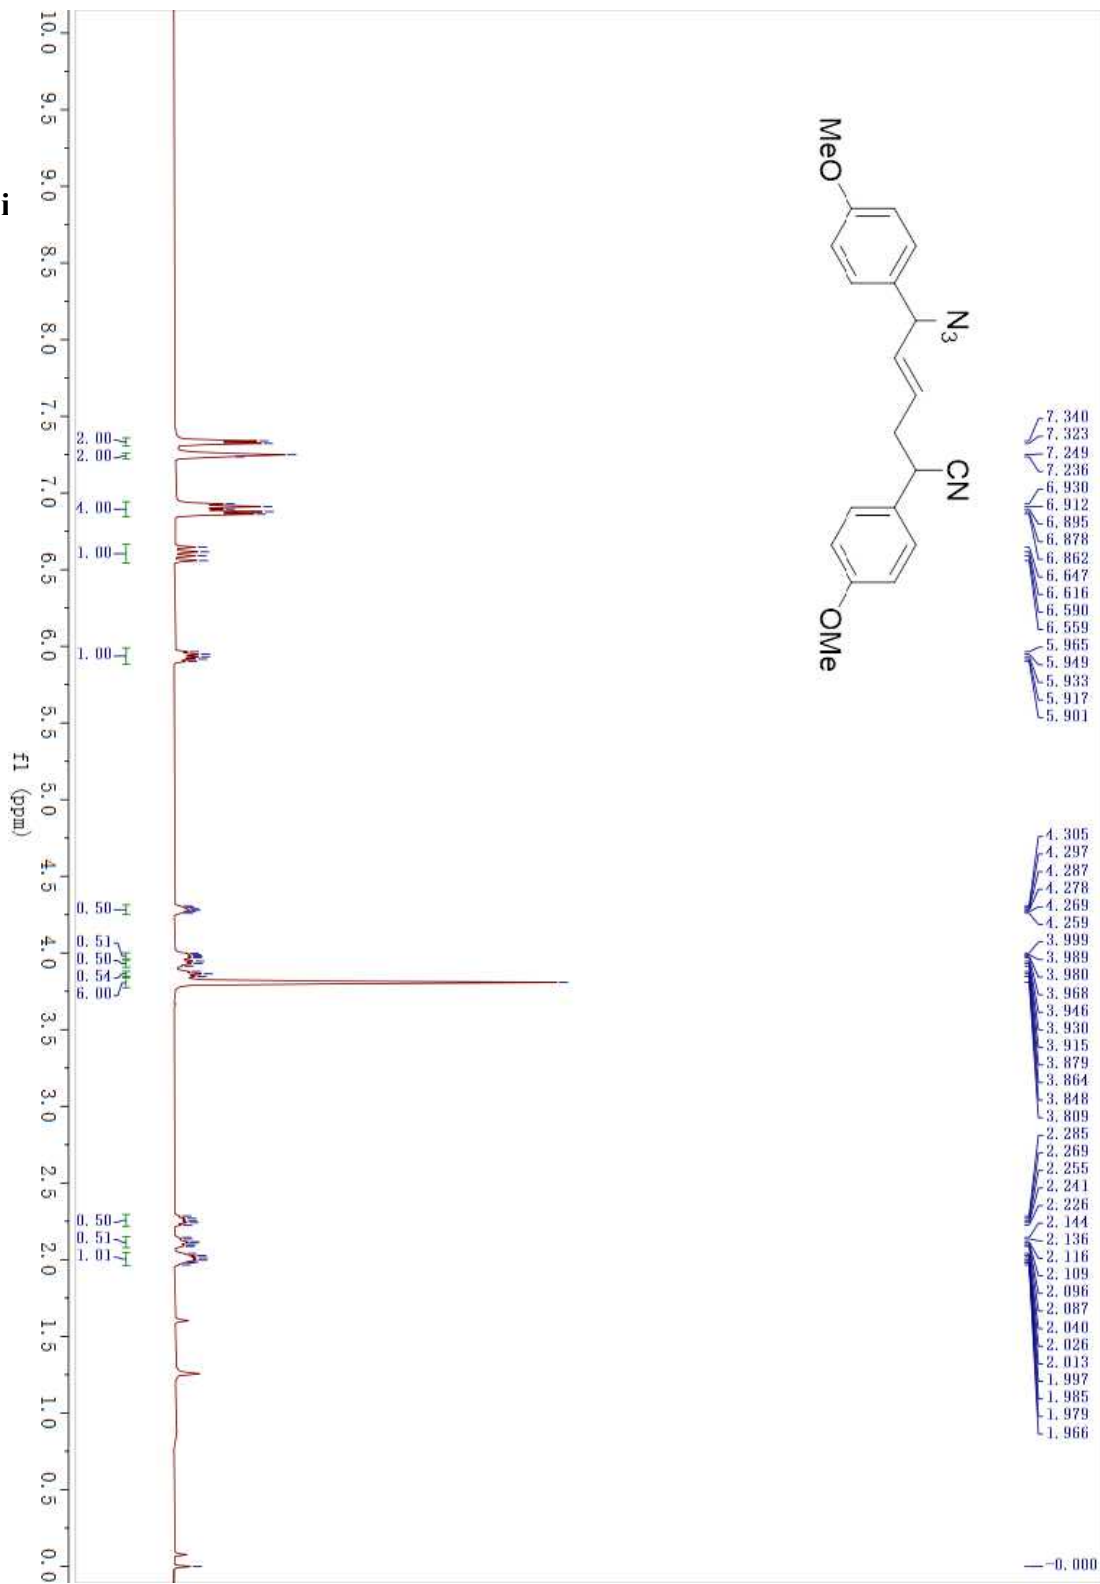



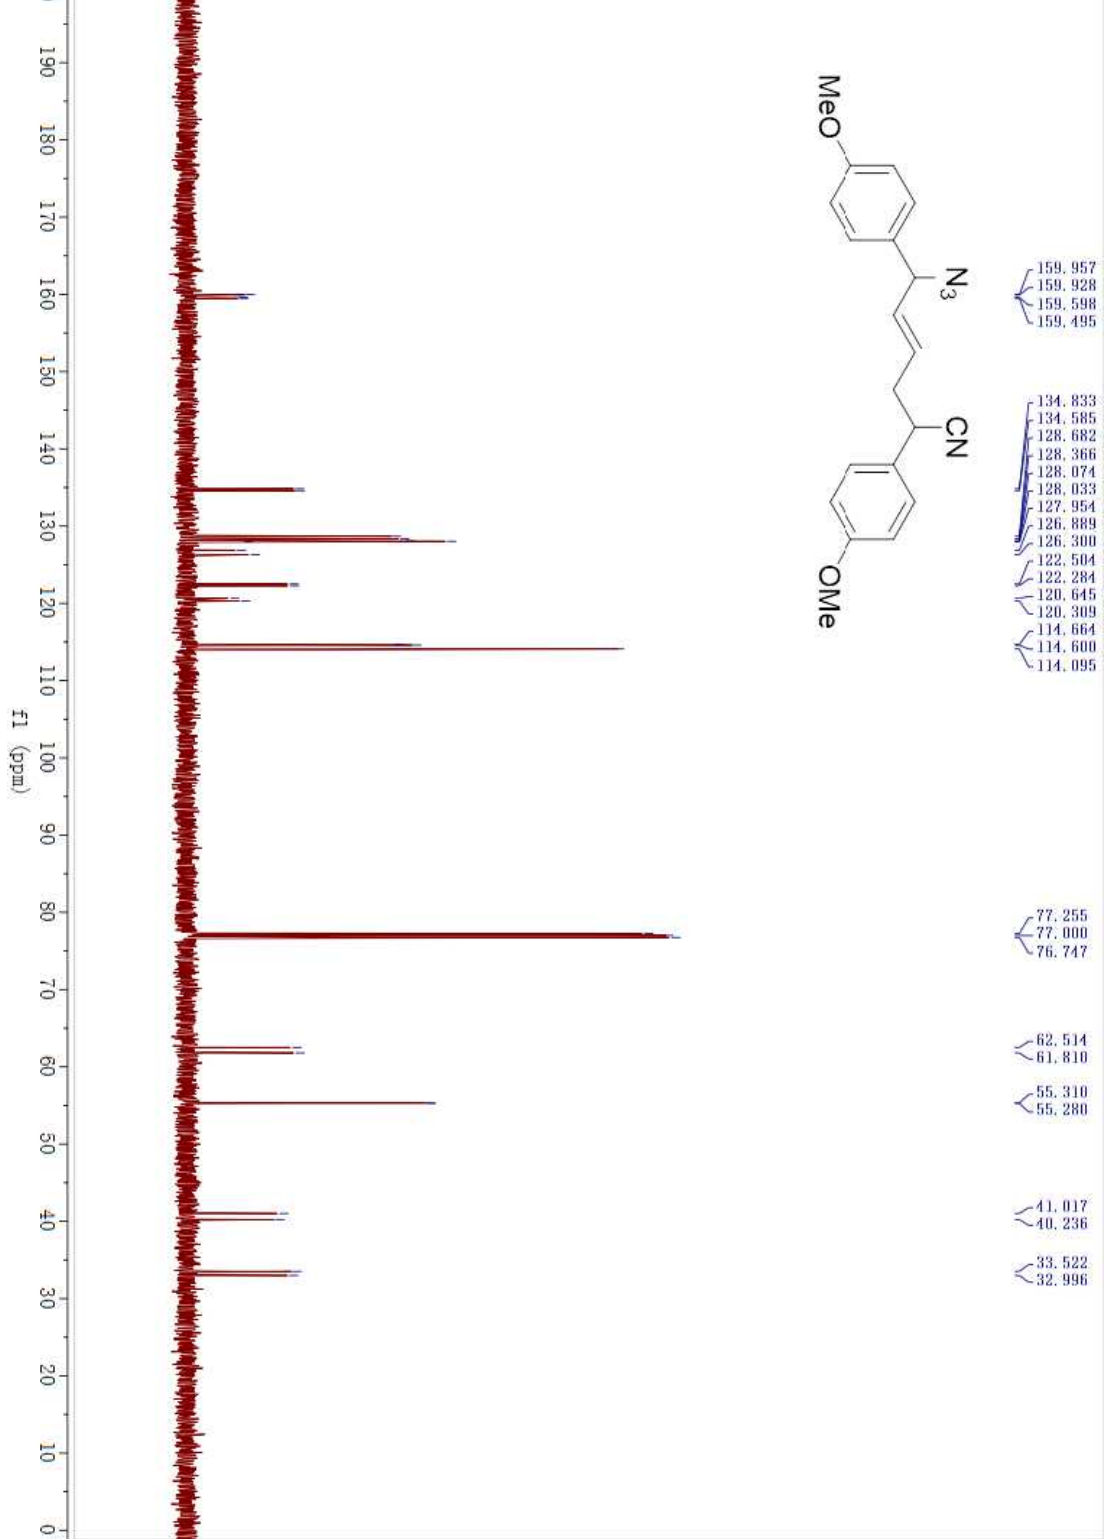

**(E)-6-azido-2-(4-t**

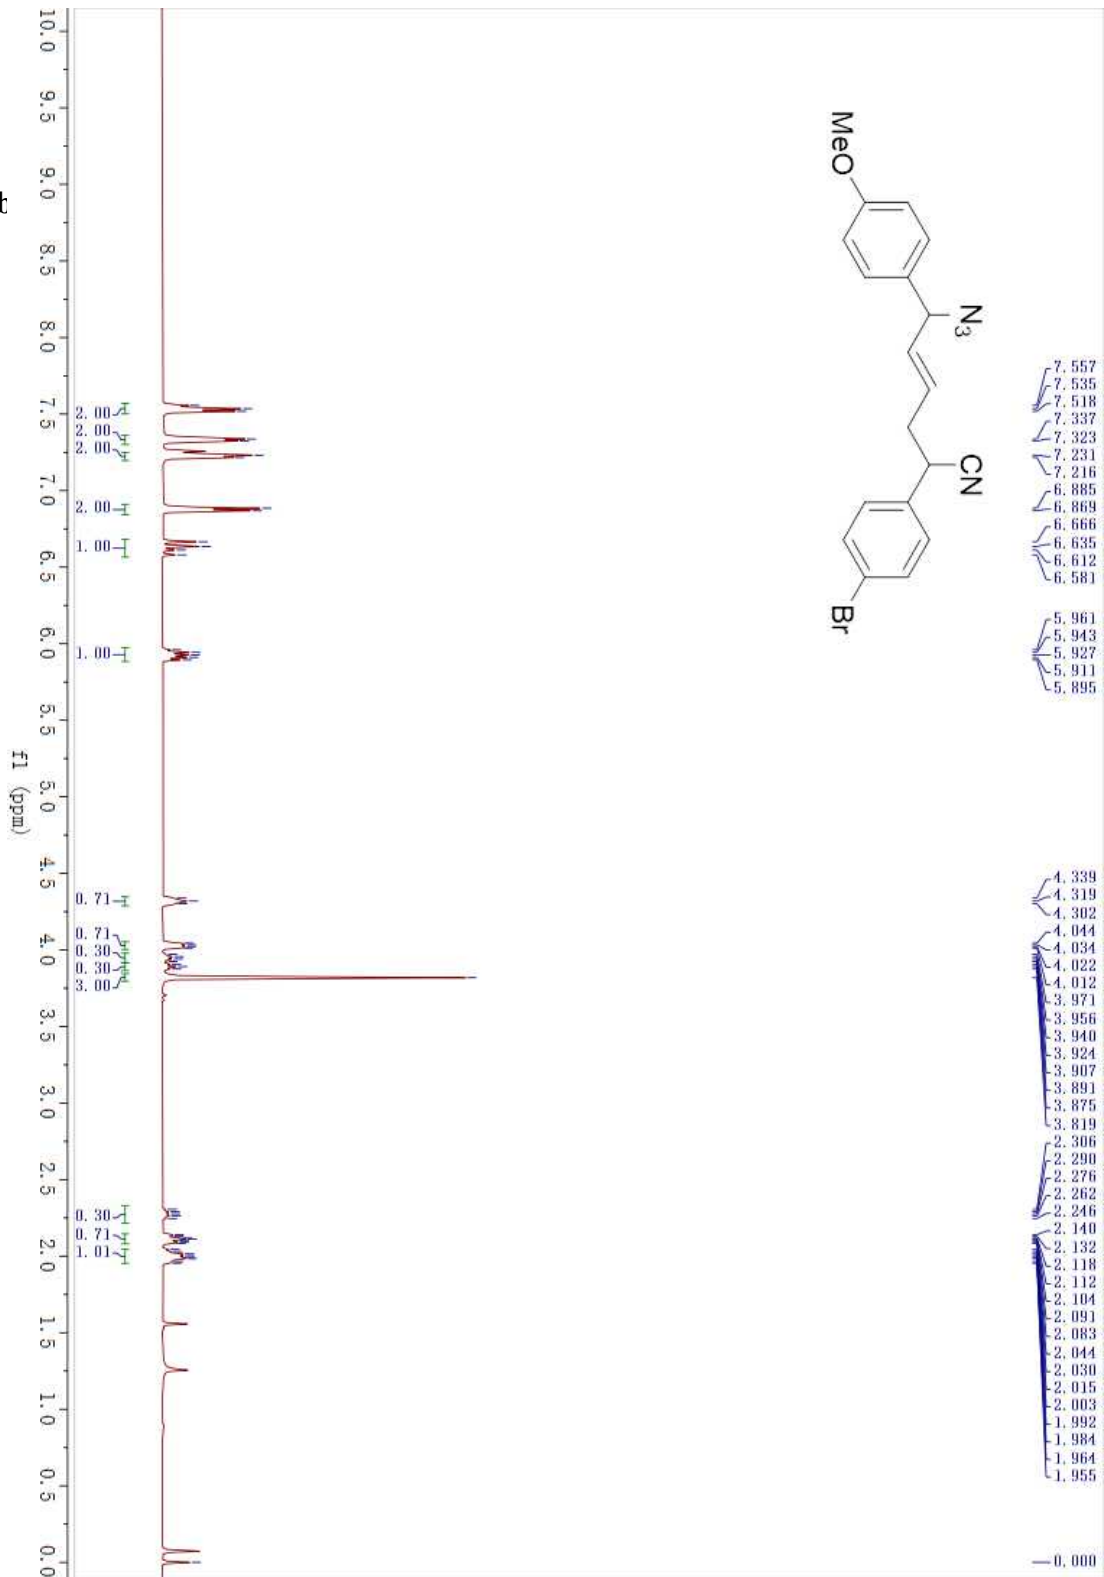

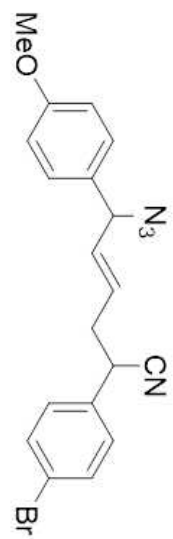

- 160.020
- 135.259
- 134.826
- 134.073
- 133.524
- 132.539
- 132.457
- 129.235
- 128.914
- 128.139
- 128.083
- 127.918
- 122.685
- 122.468
- 122.233
- 121.899
- 119.528
- 114.148
- 77.255
- 77.000
- 76.746
- 62.469
- 61.732
- 55.321
- 40.947
- 40.075
- 33.930
- 33.355

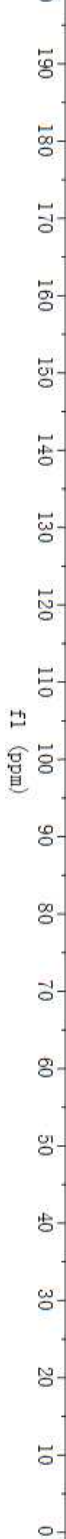

**(E)-6-azido-2-(4-t**

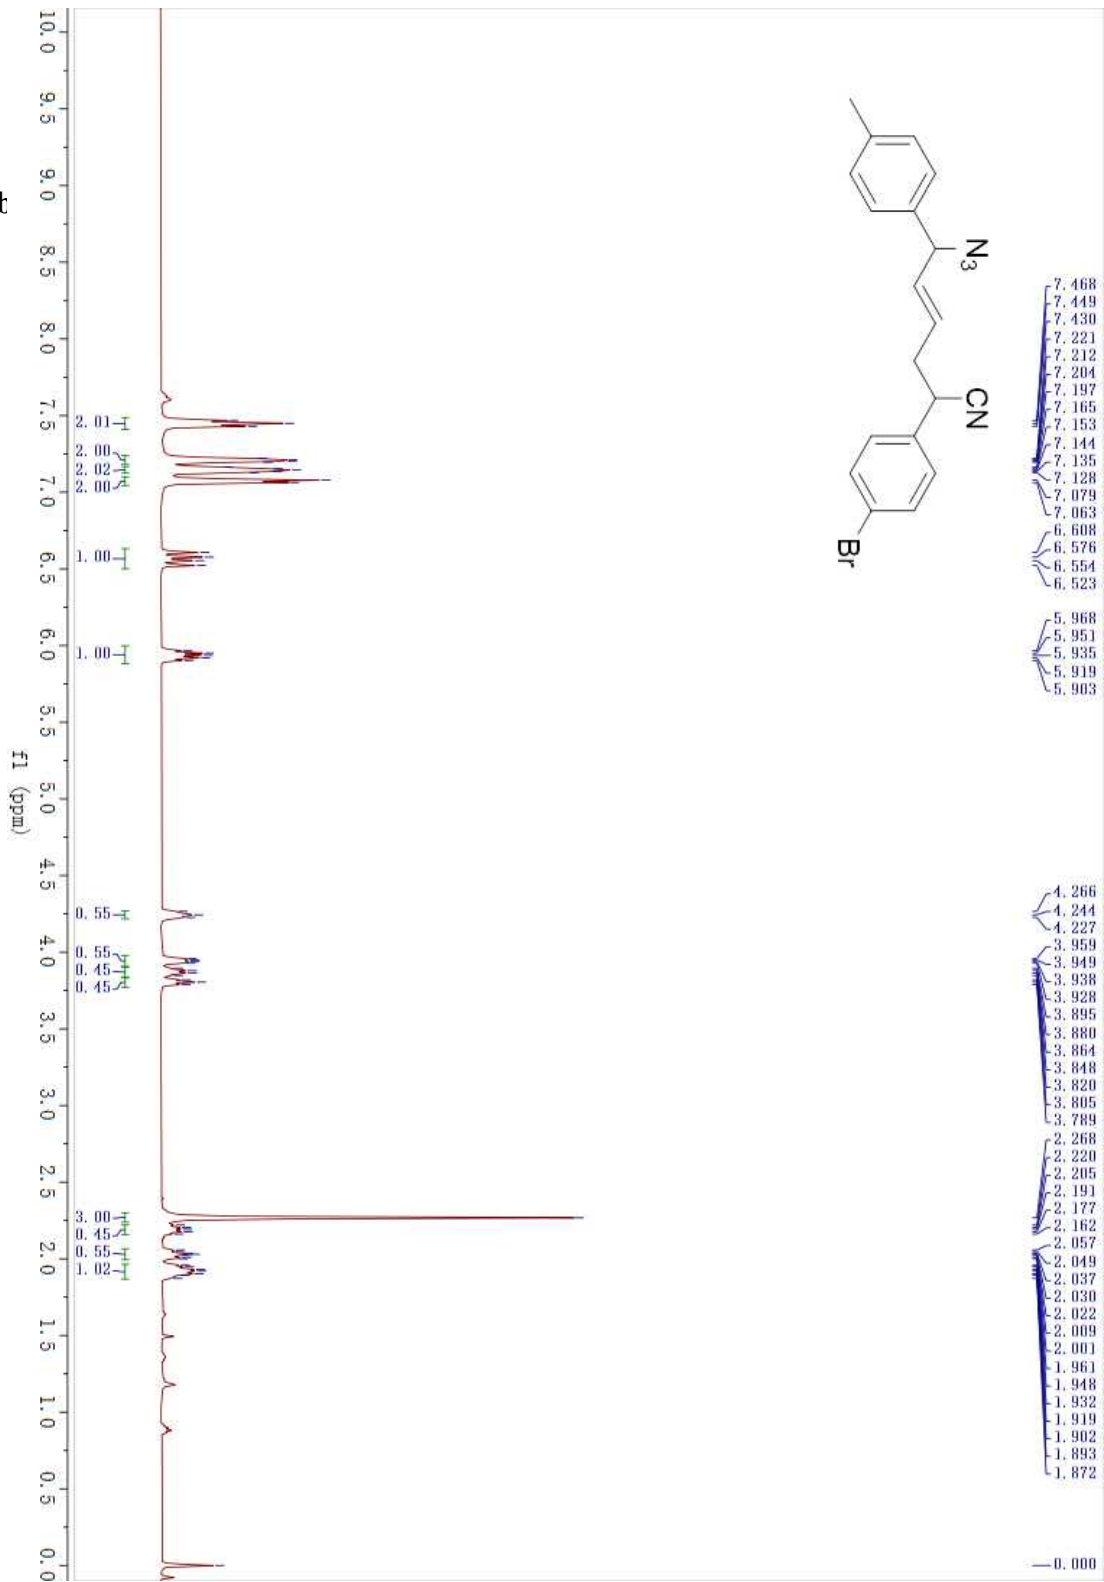

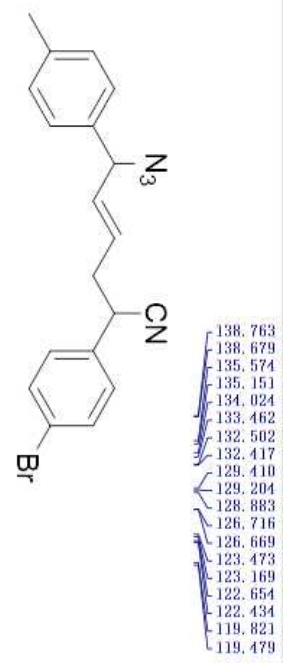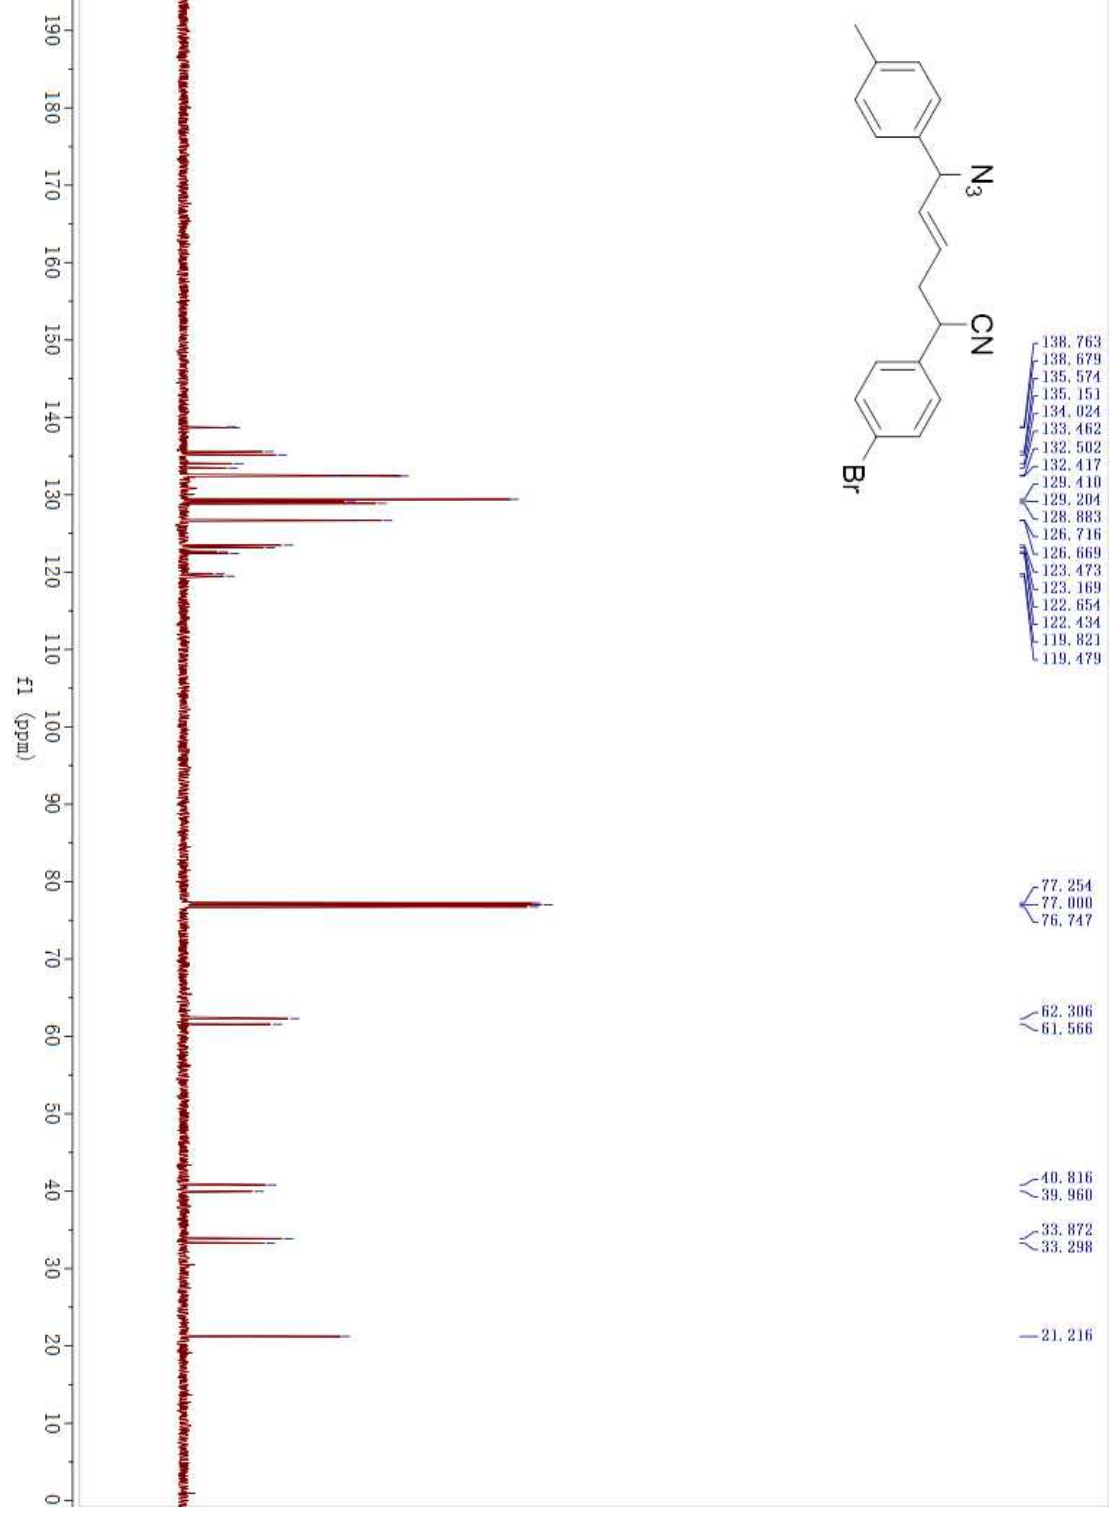

**(E)-1-(3,4-diazido**

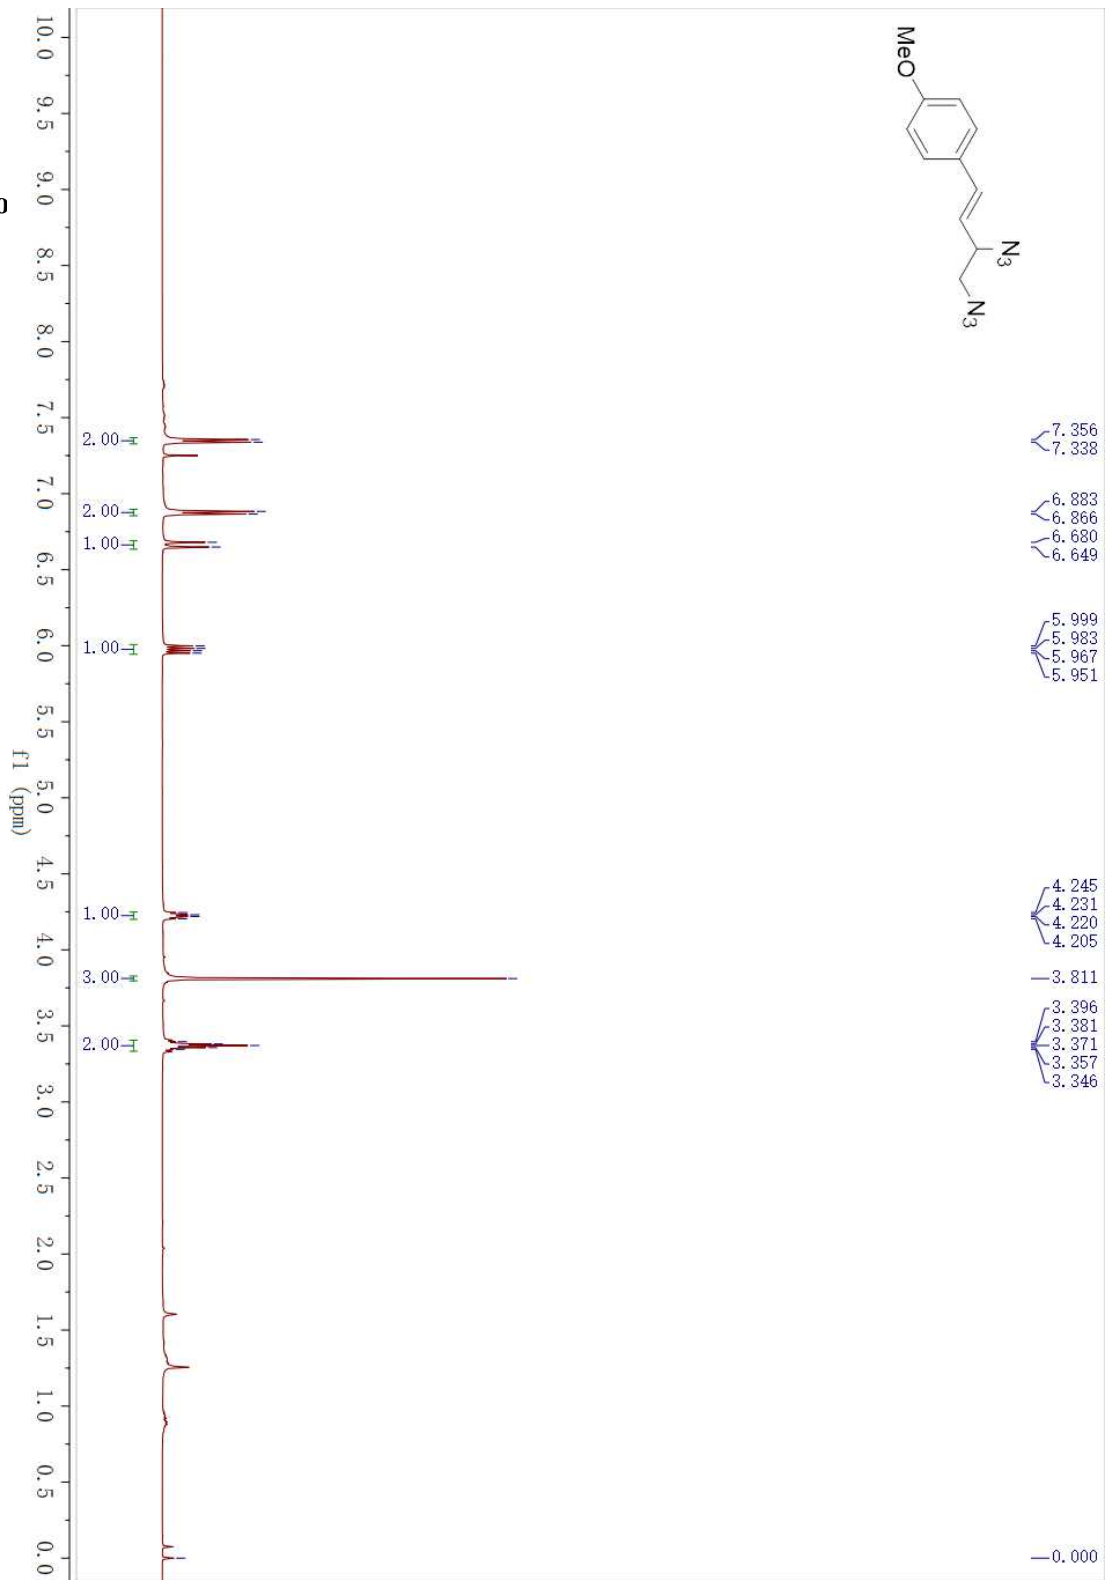

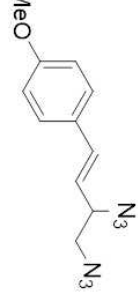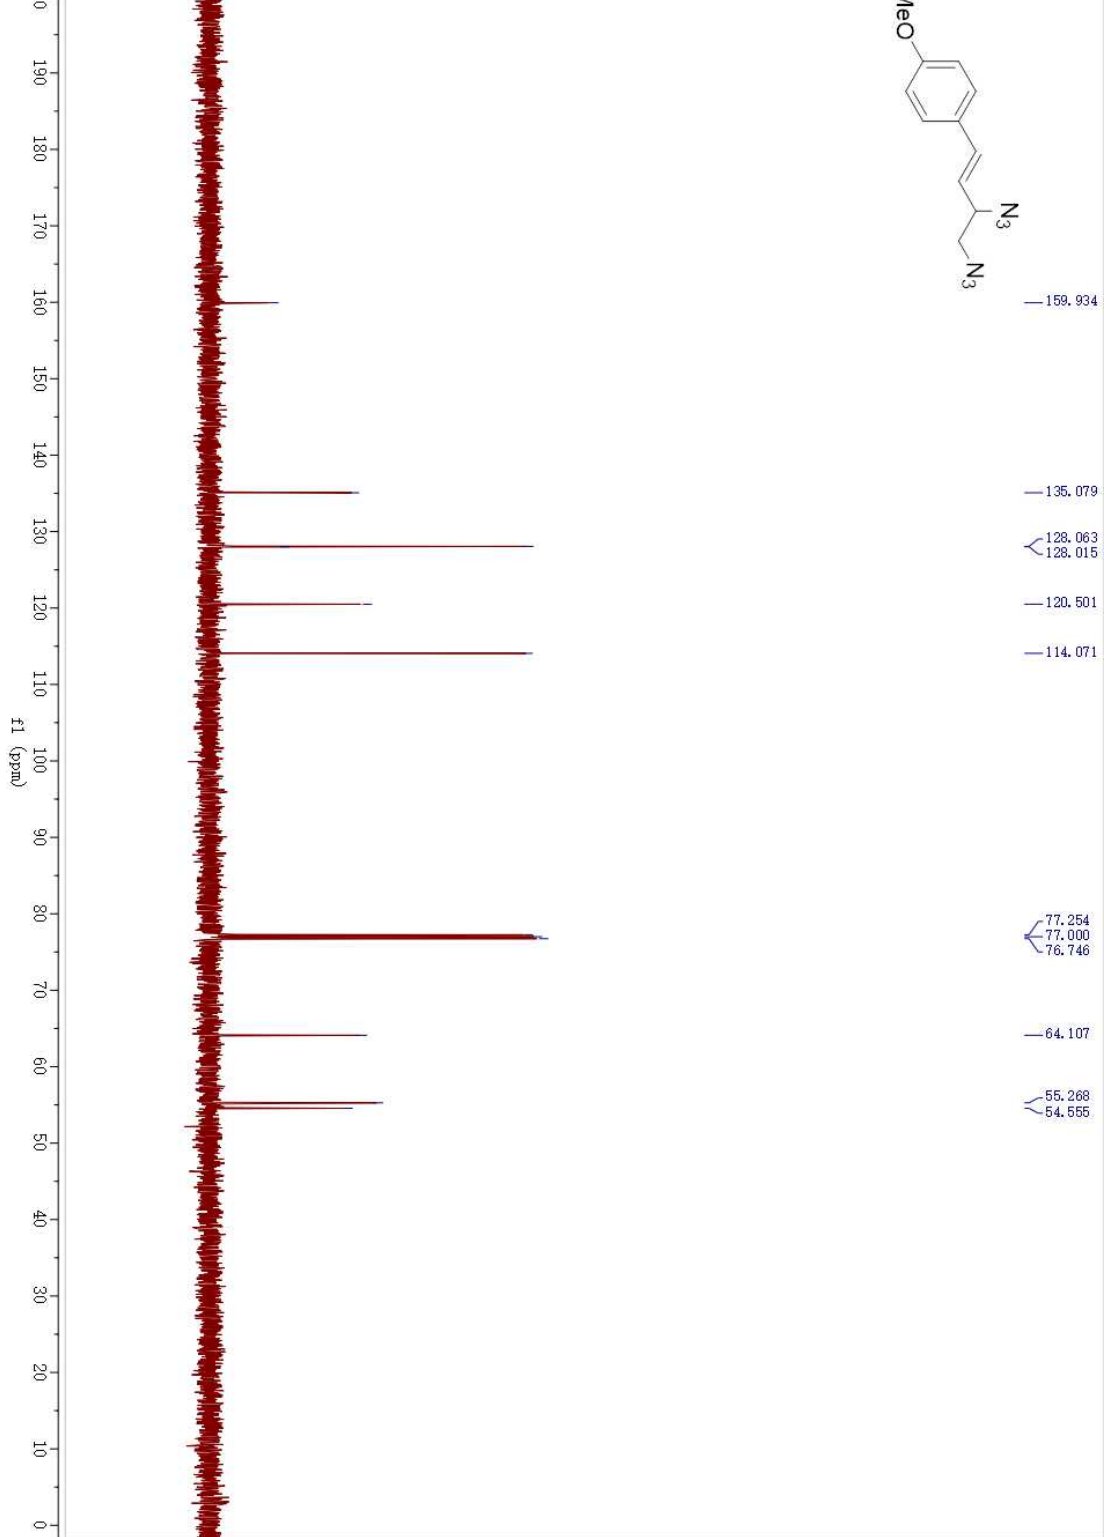

**(E)-(3,4-diazidobut-1-en-1-yl)benzene**

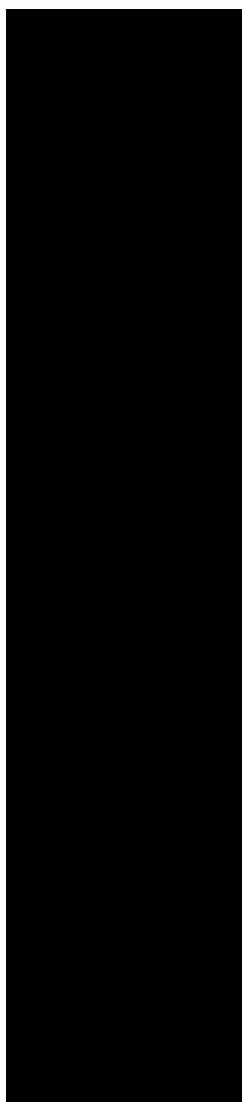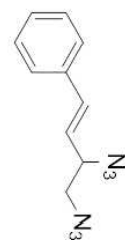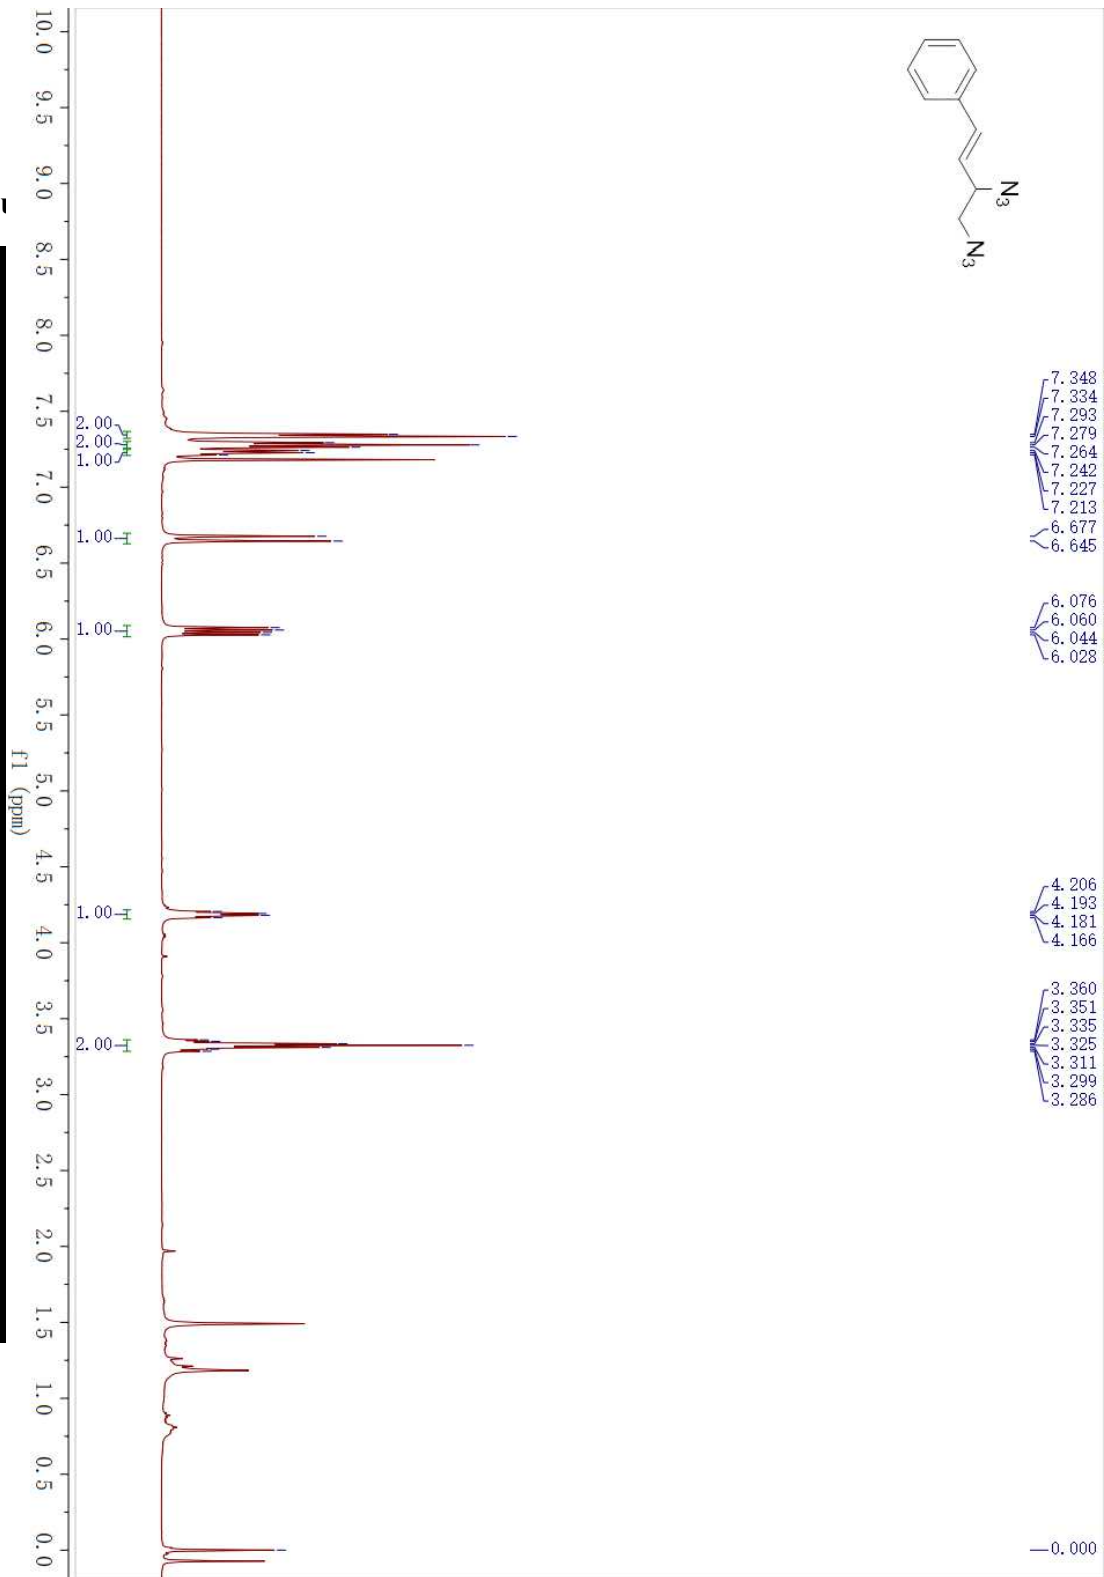



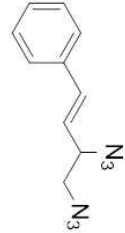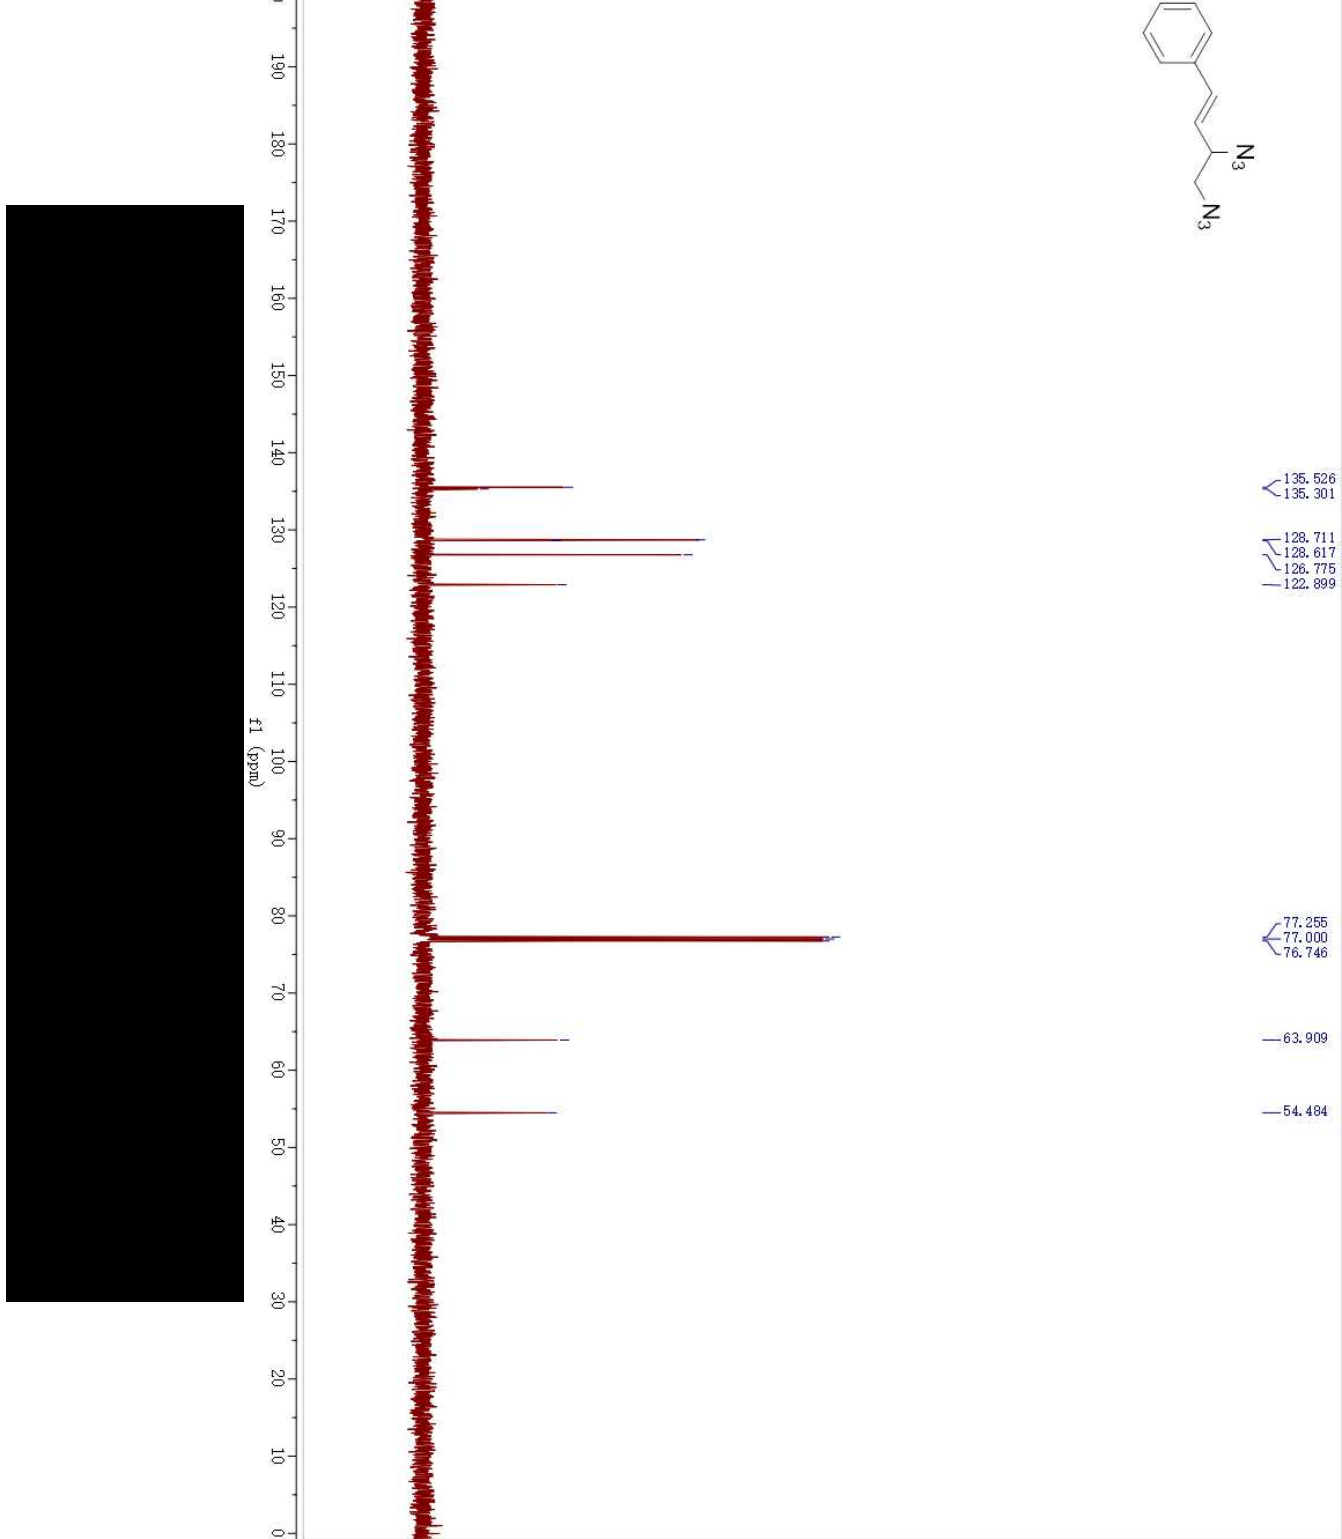

**(E)-1-(3,4-diazido**

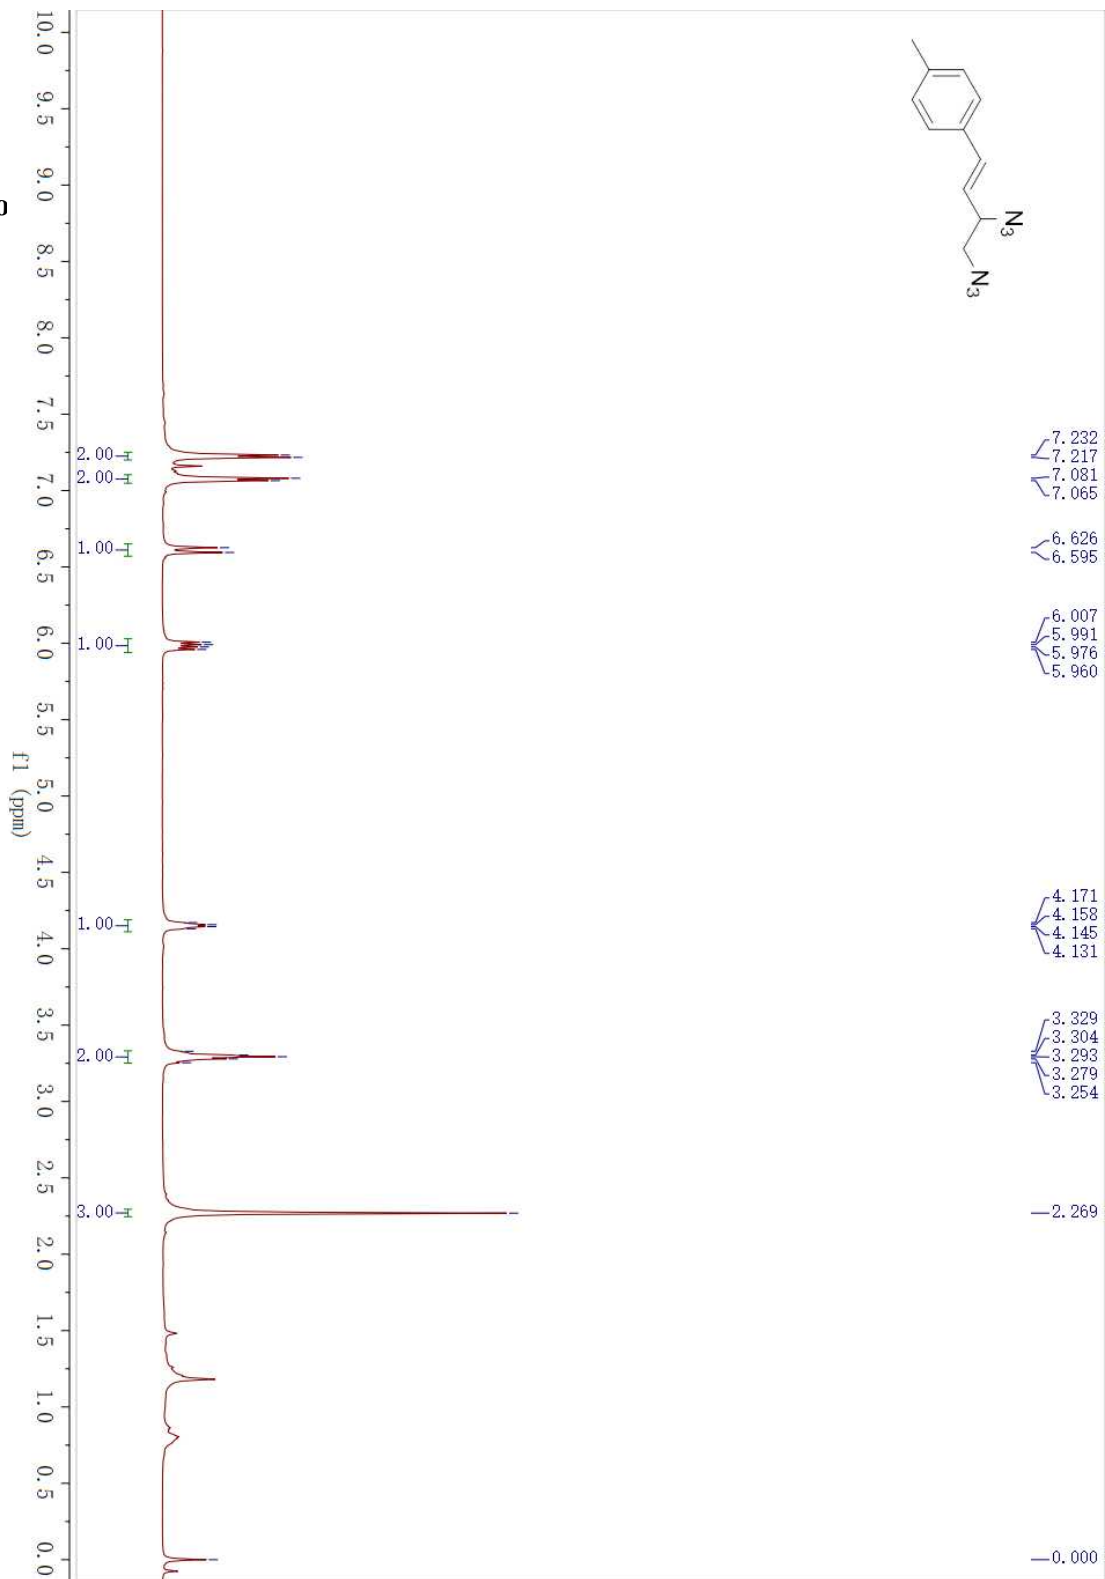

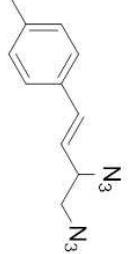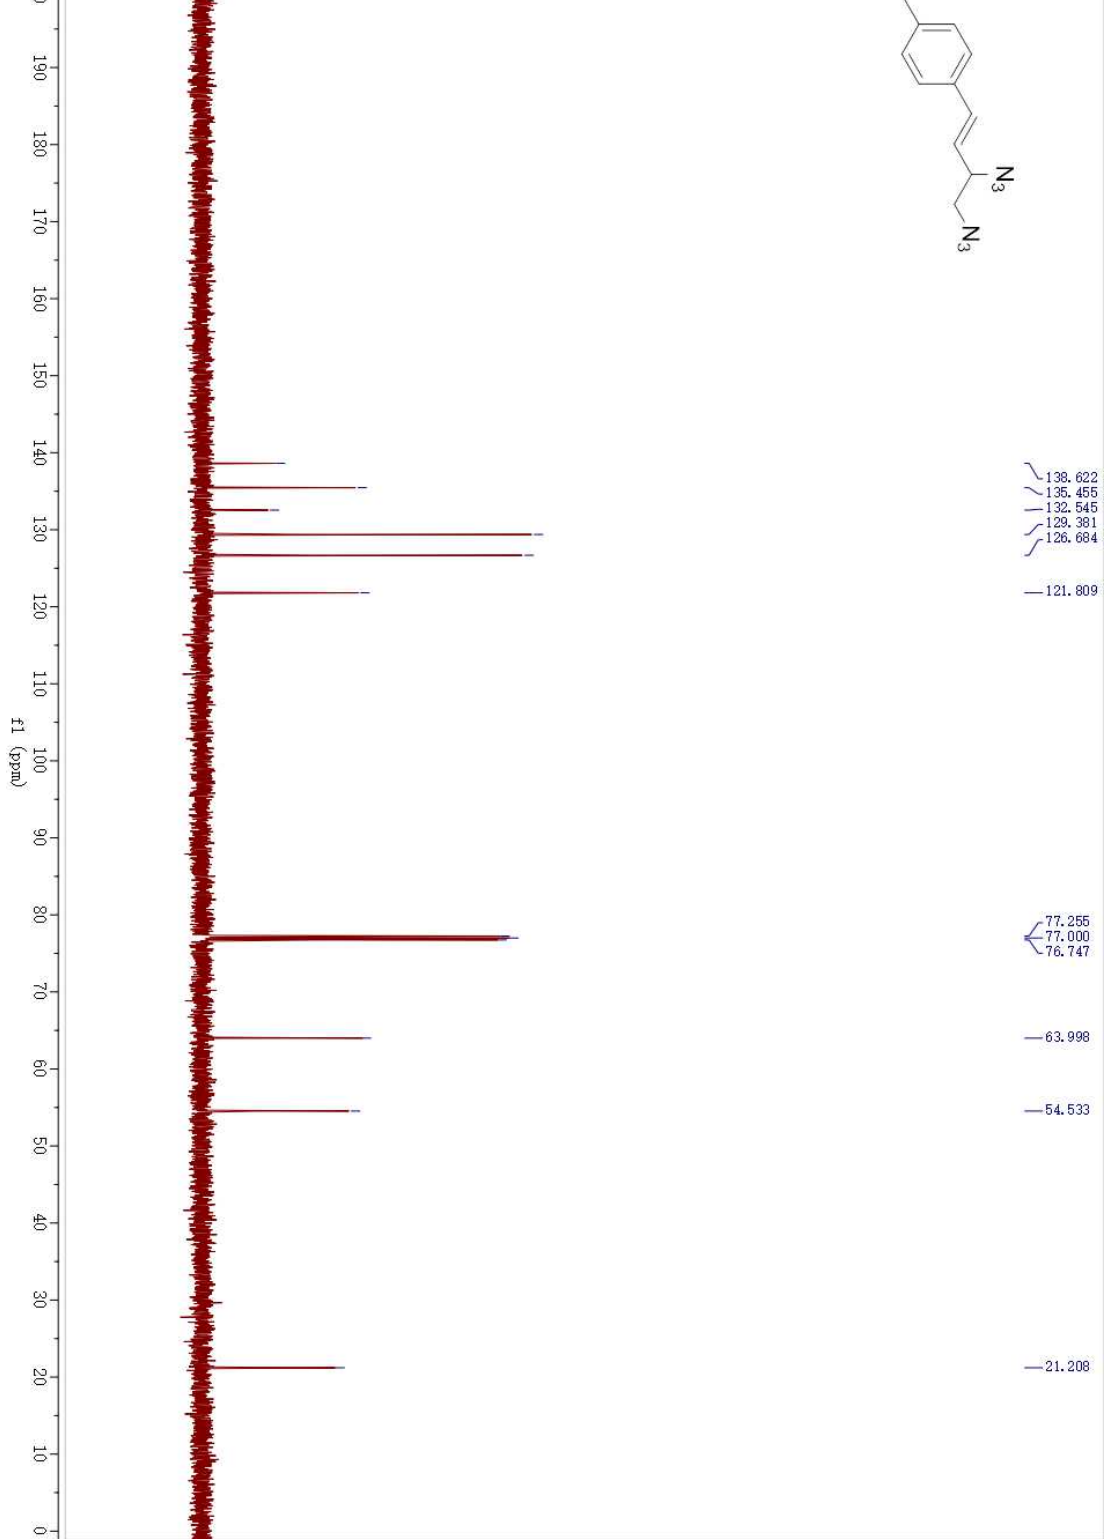

**(E)-1-bromo-4-(3-**

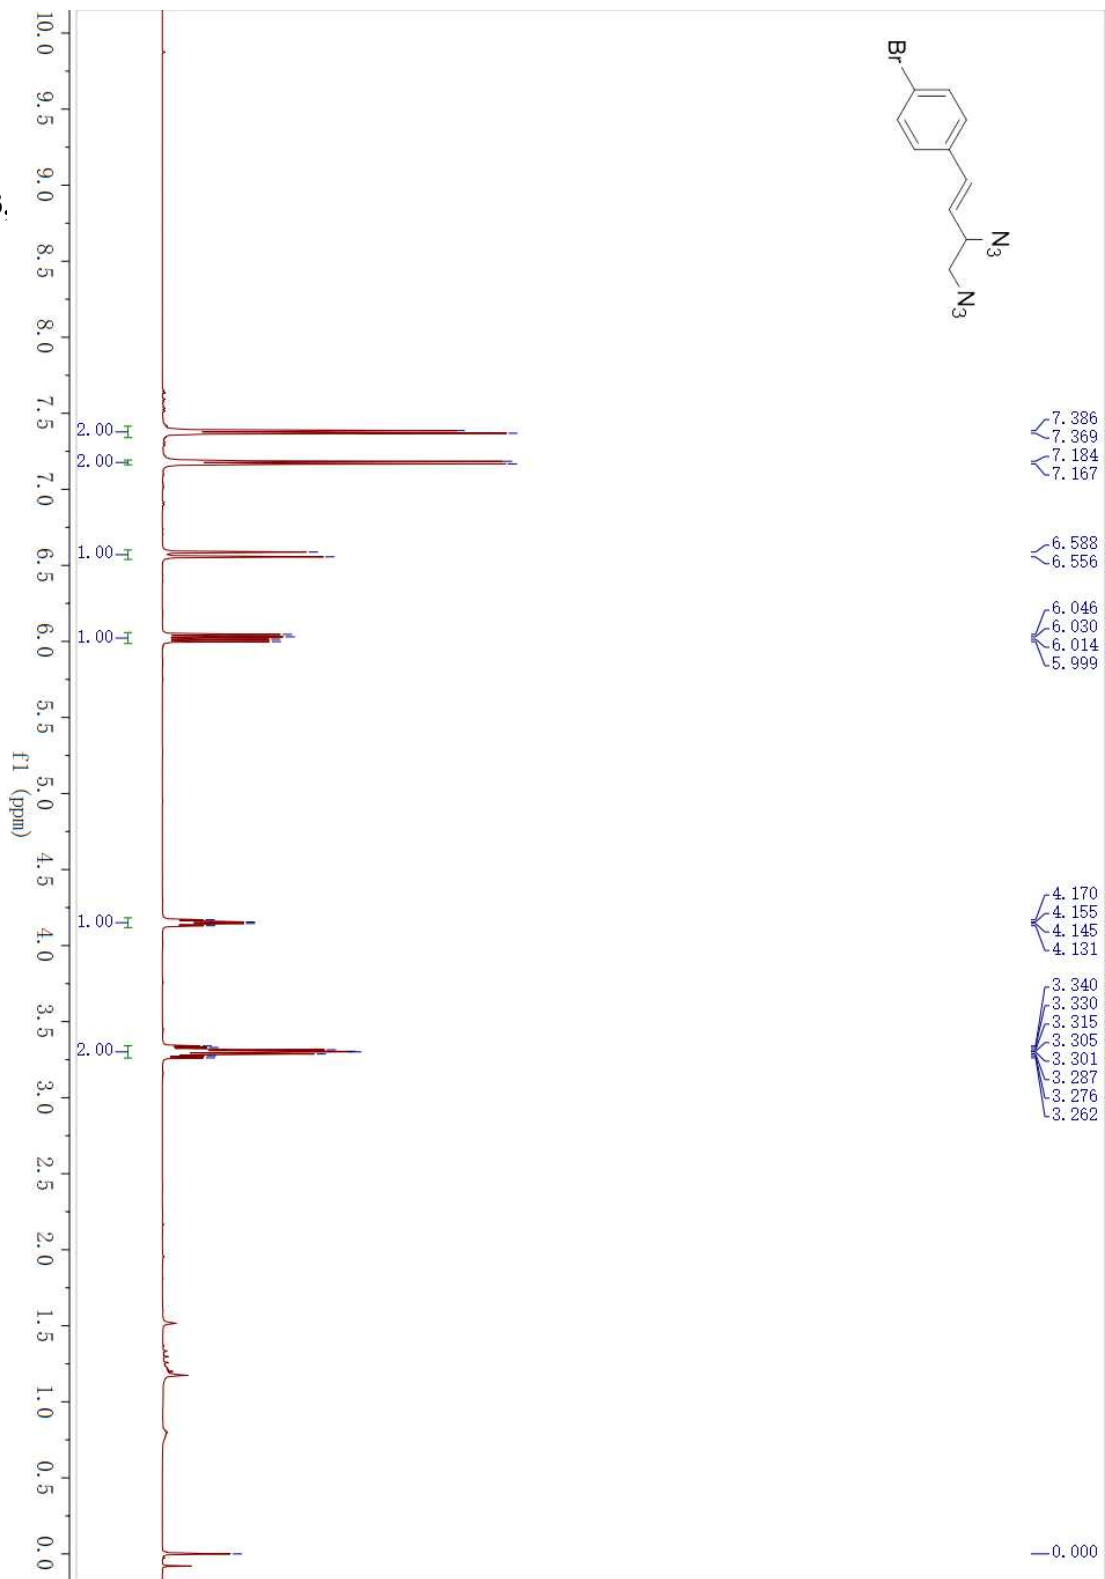

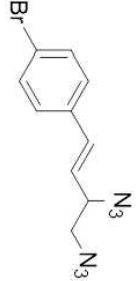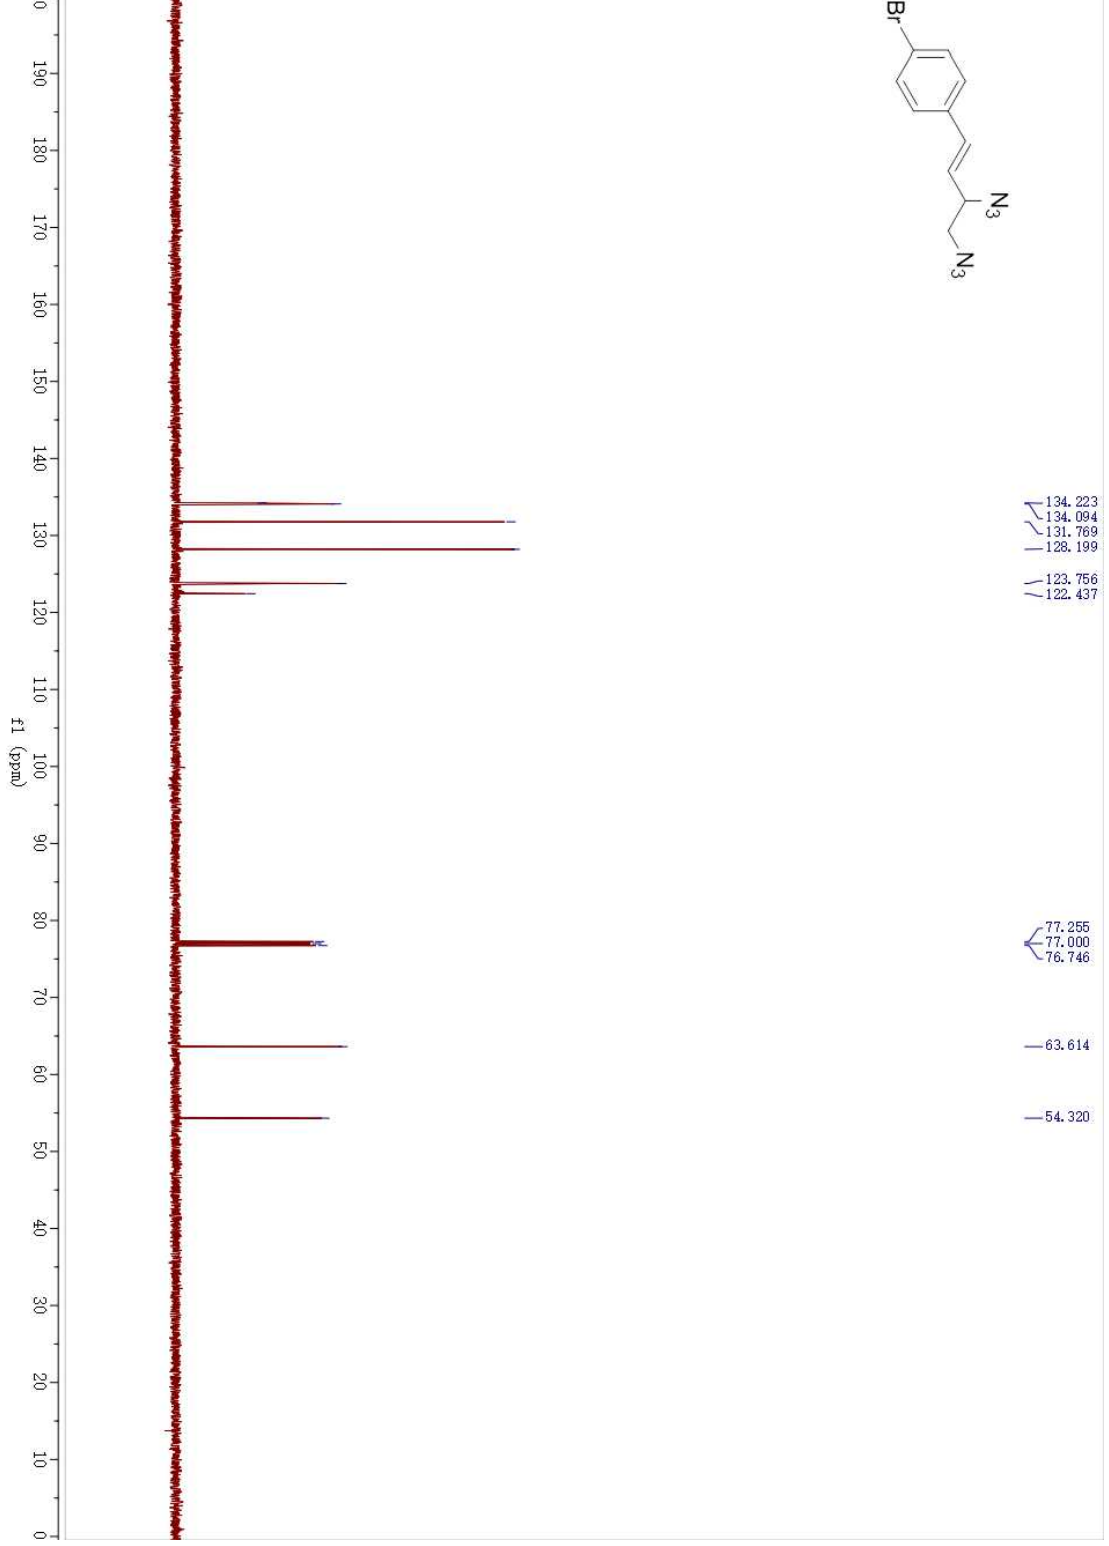

**(E)-1-chloro-4-(3,**

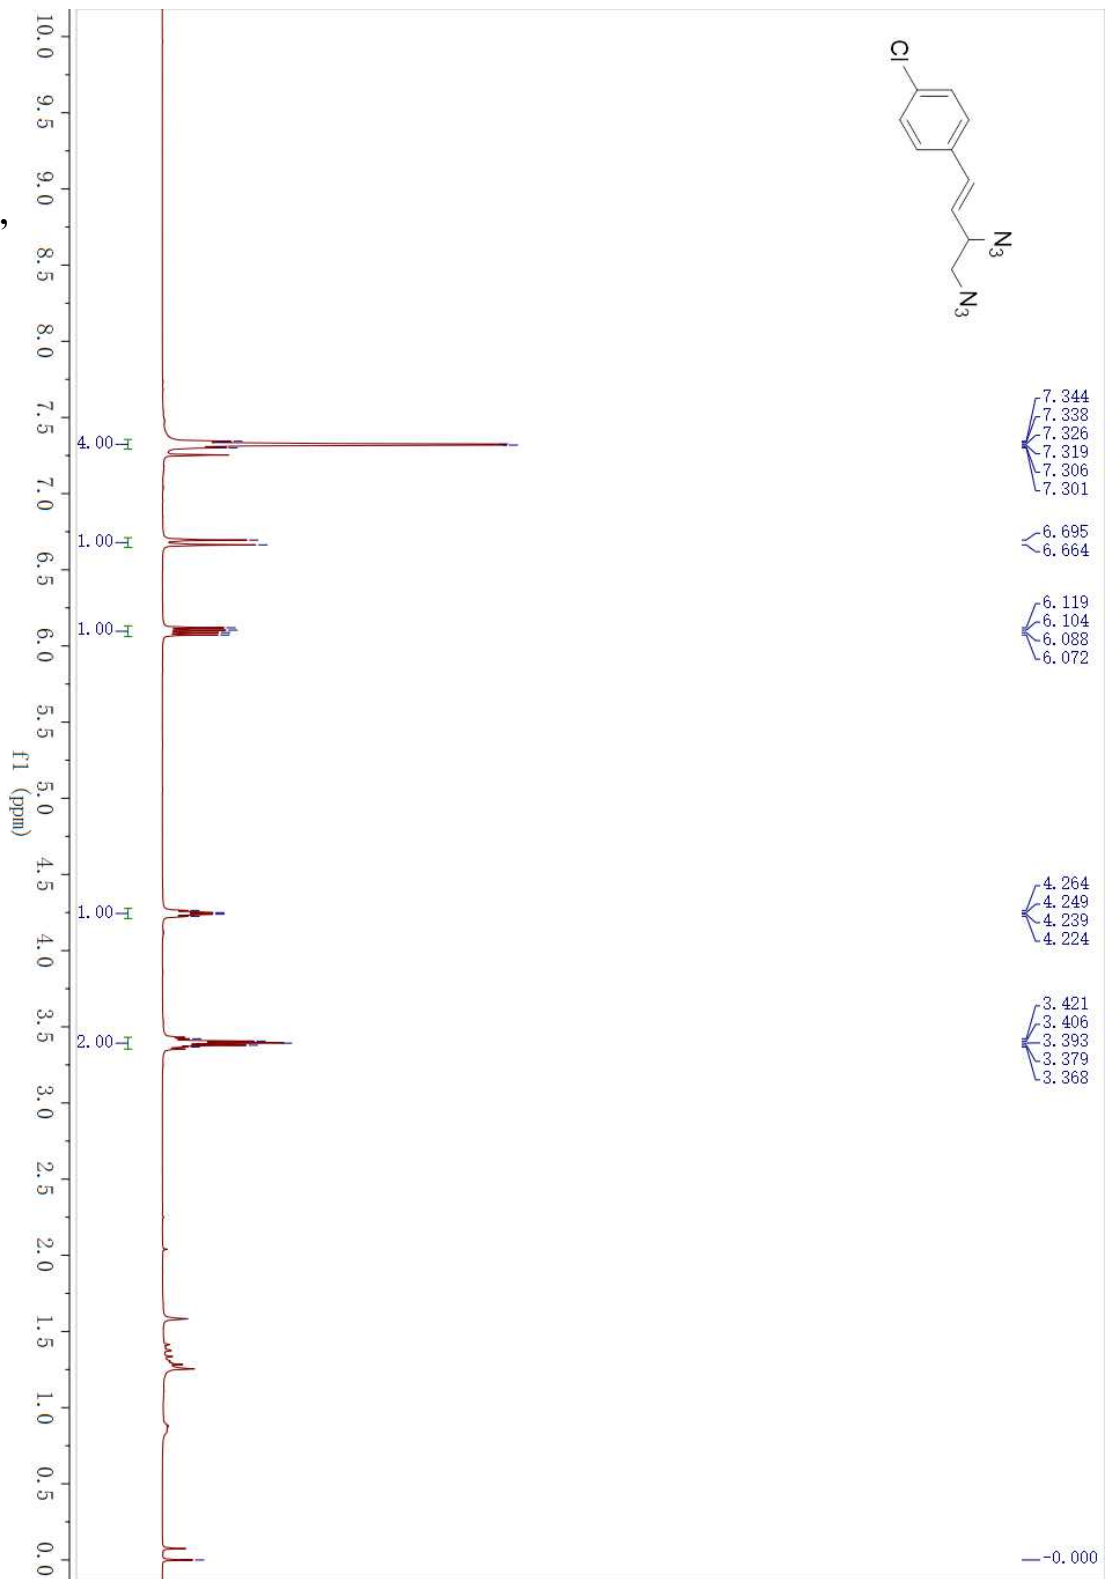

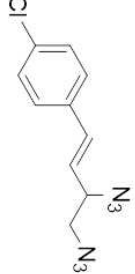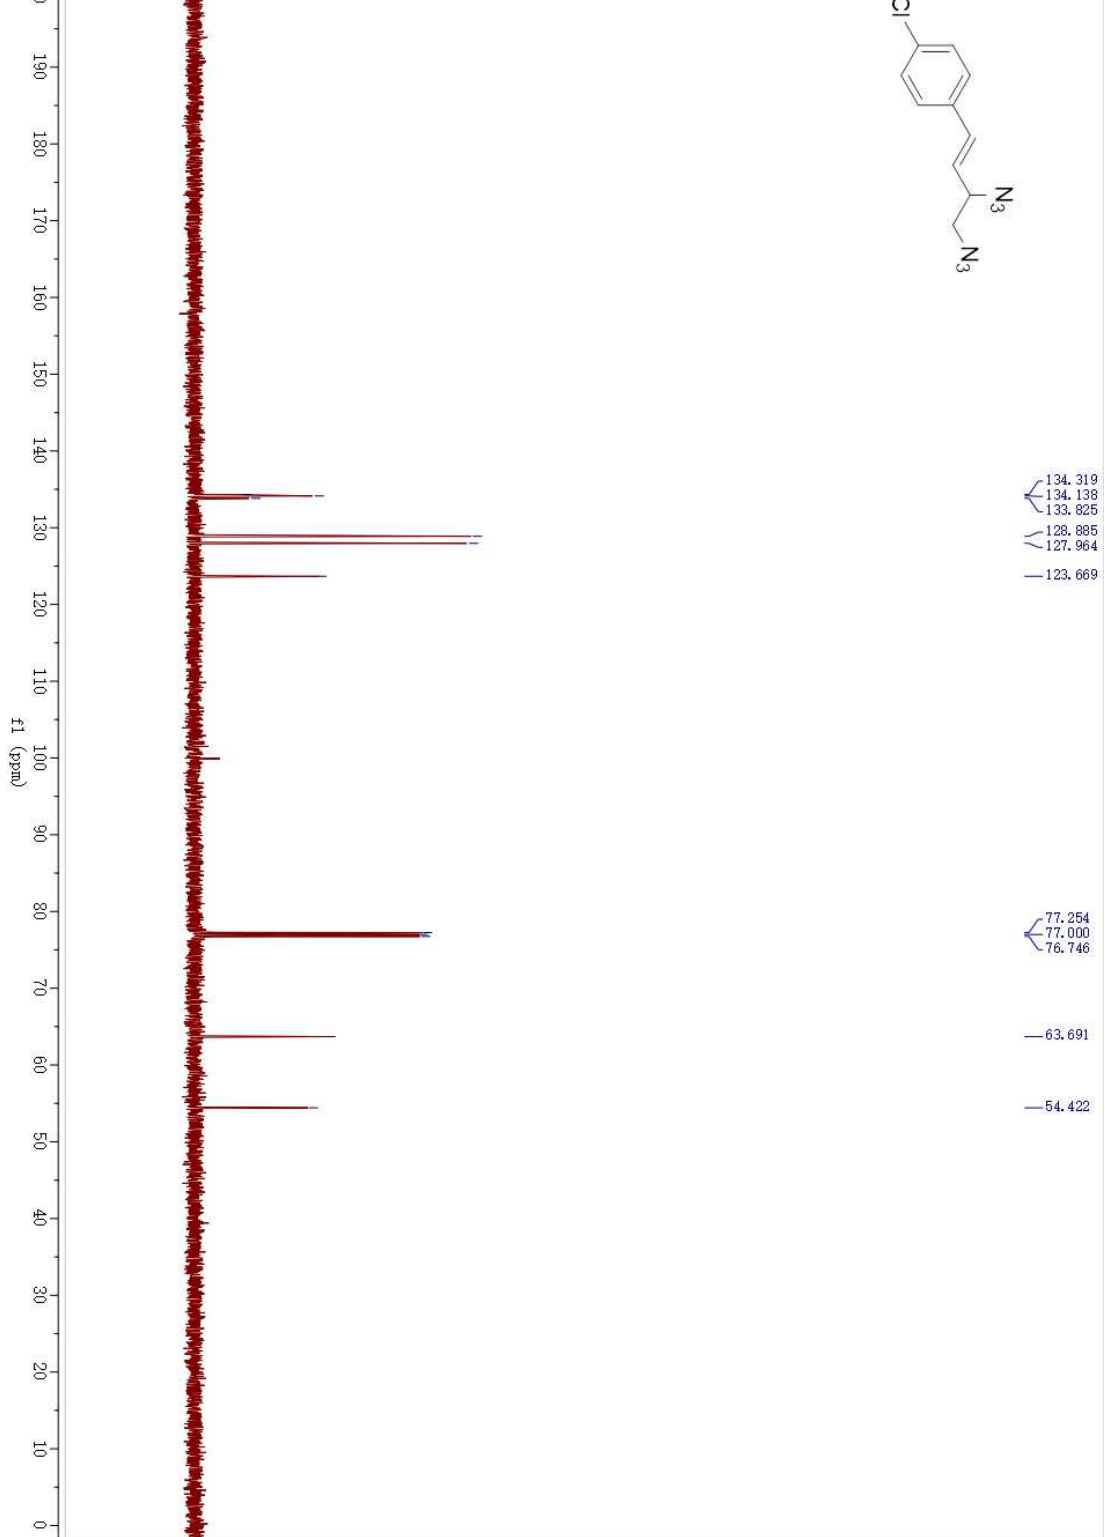

**(E)-1-(3,4-diazido**

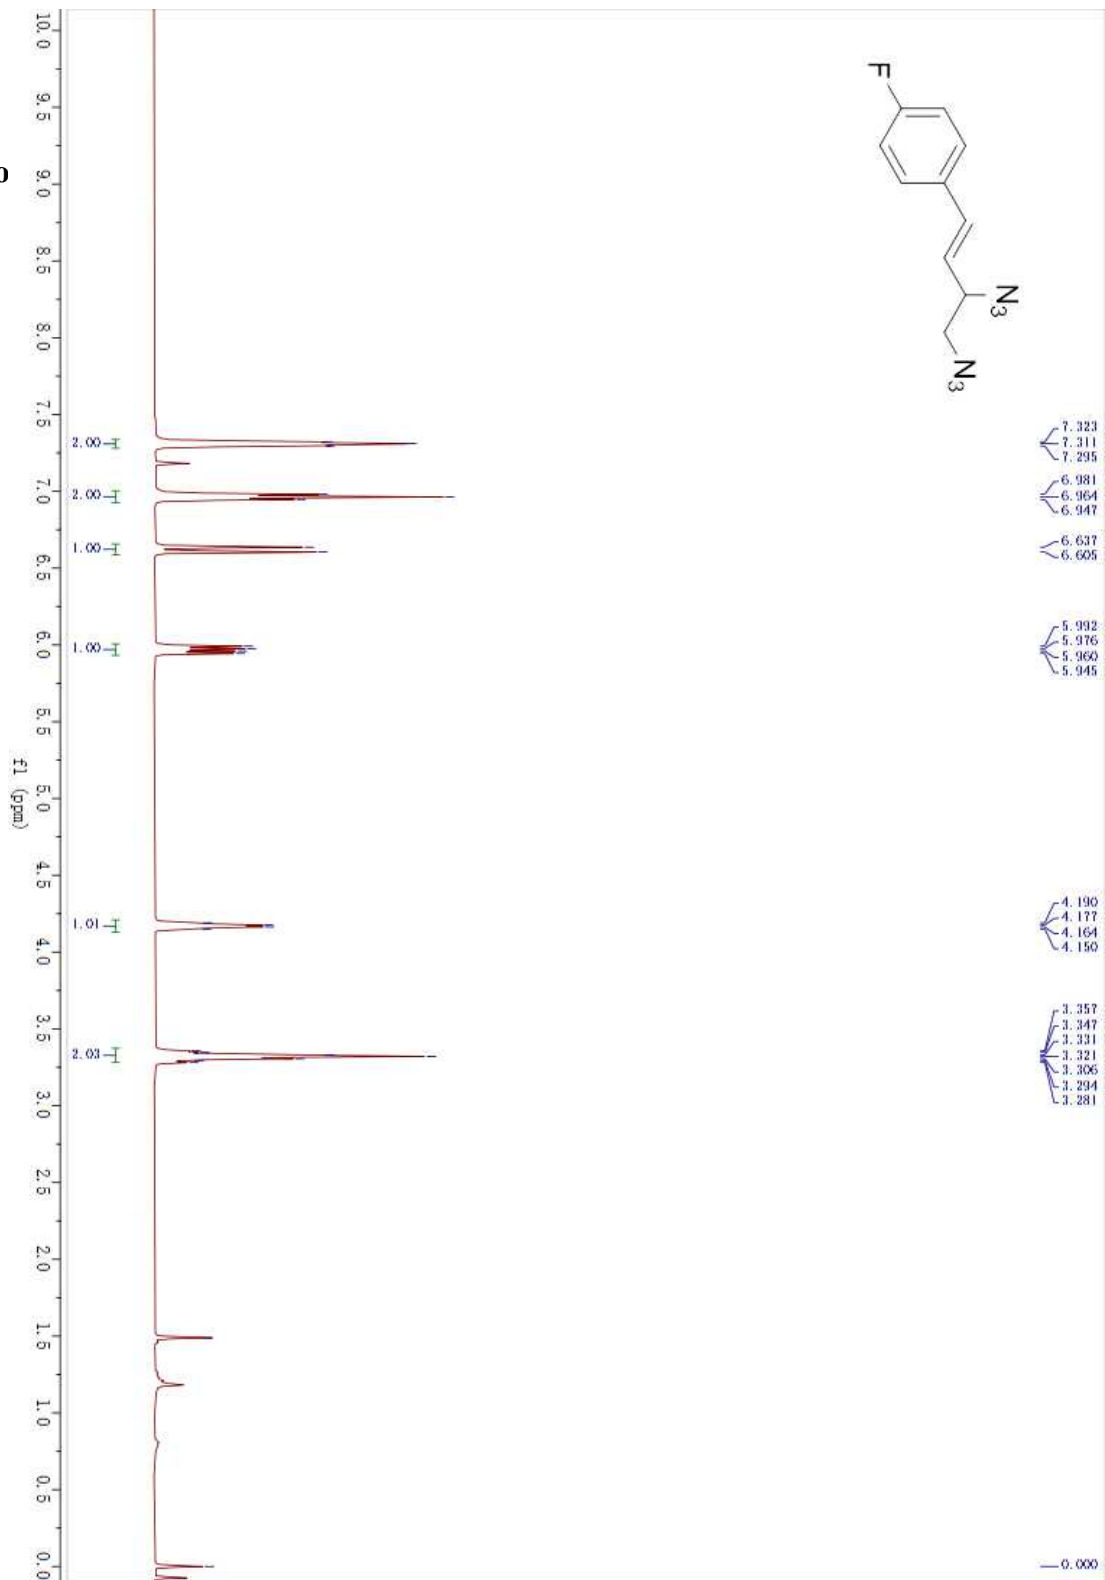



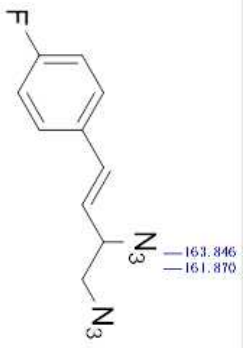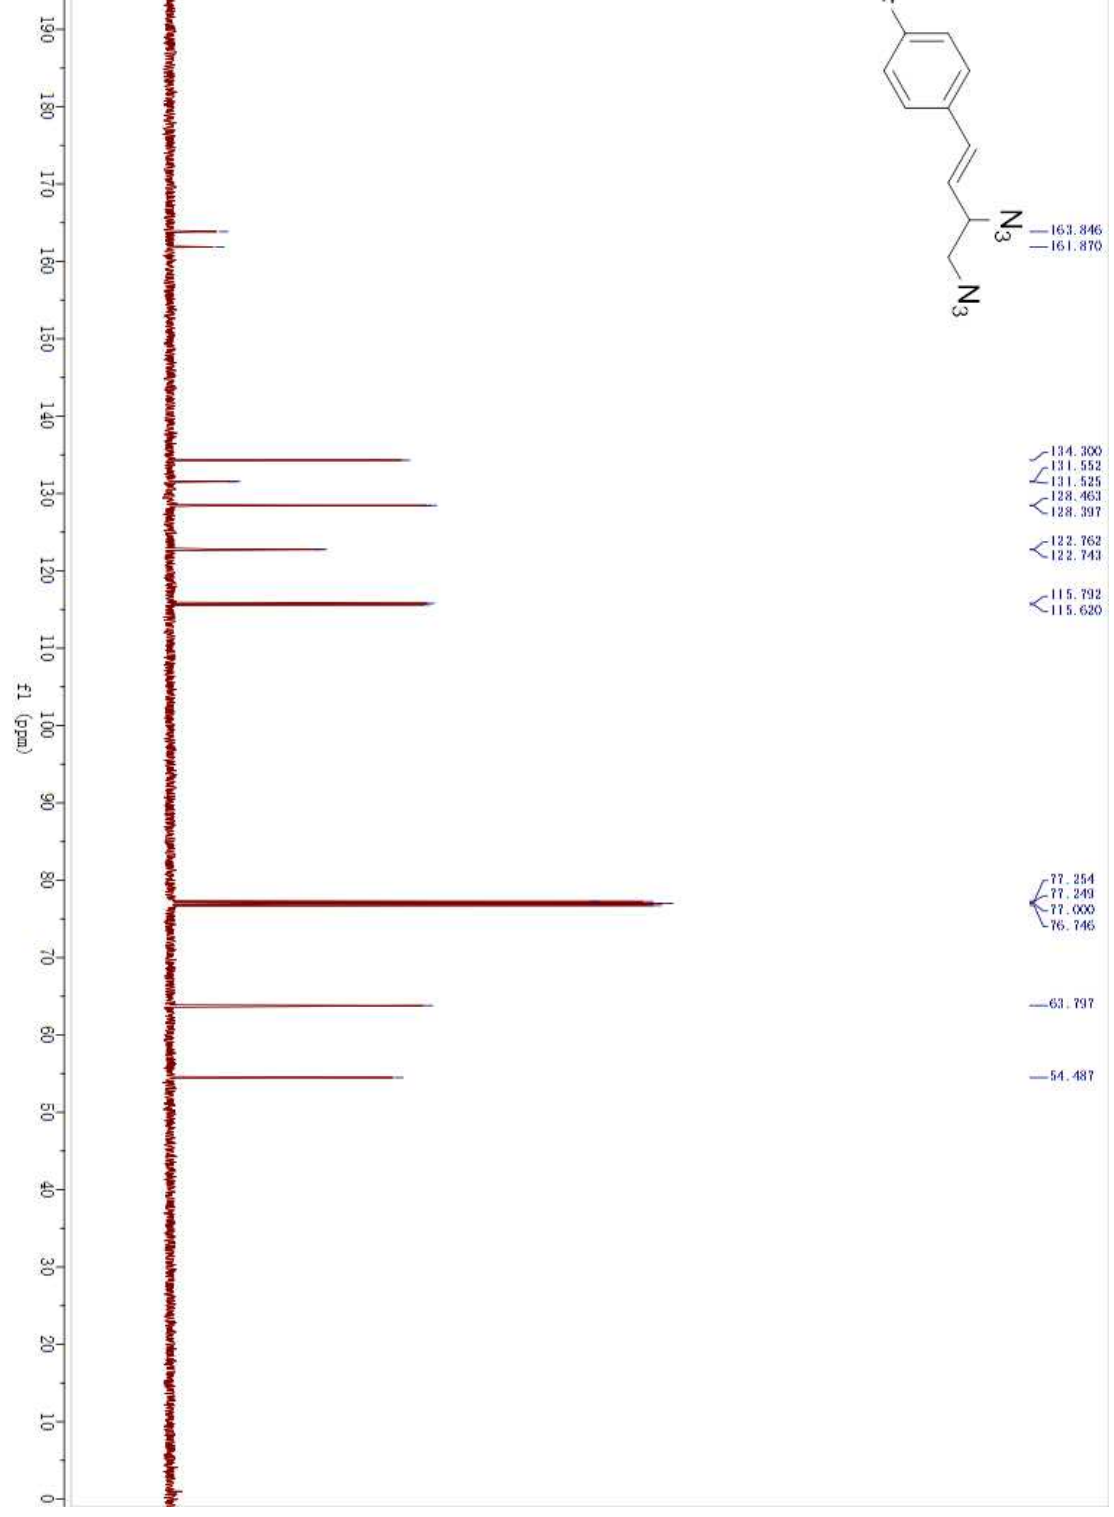

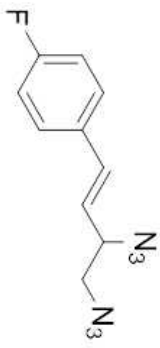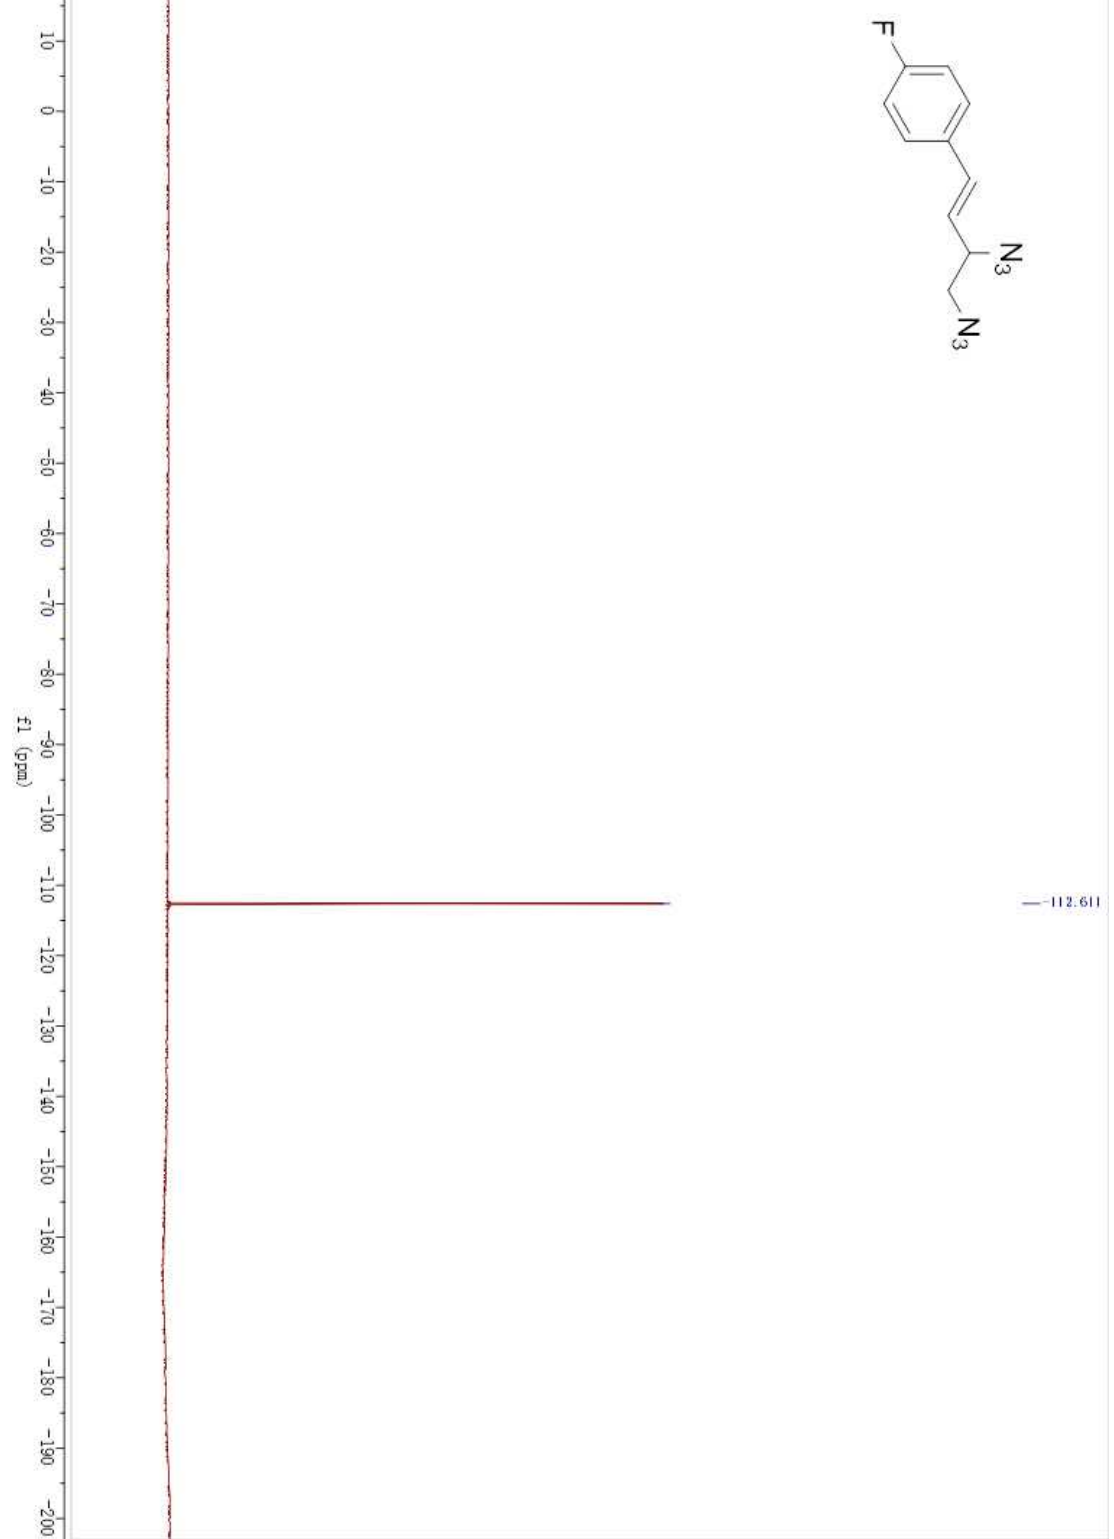

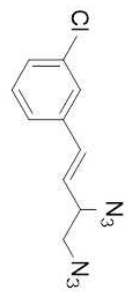

**(E)-1-chloro-3-(3,3,3-triazol-1-yl)prop-1-ene**

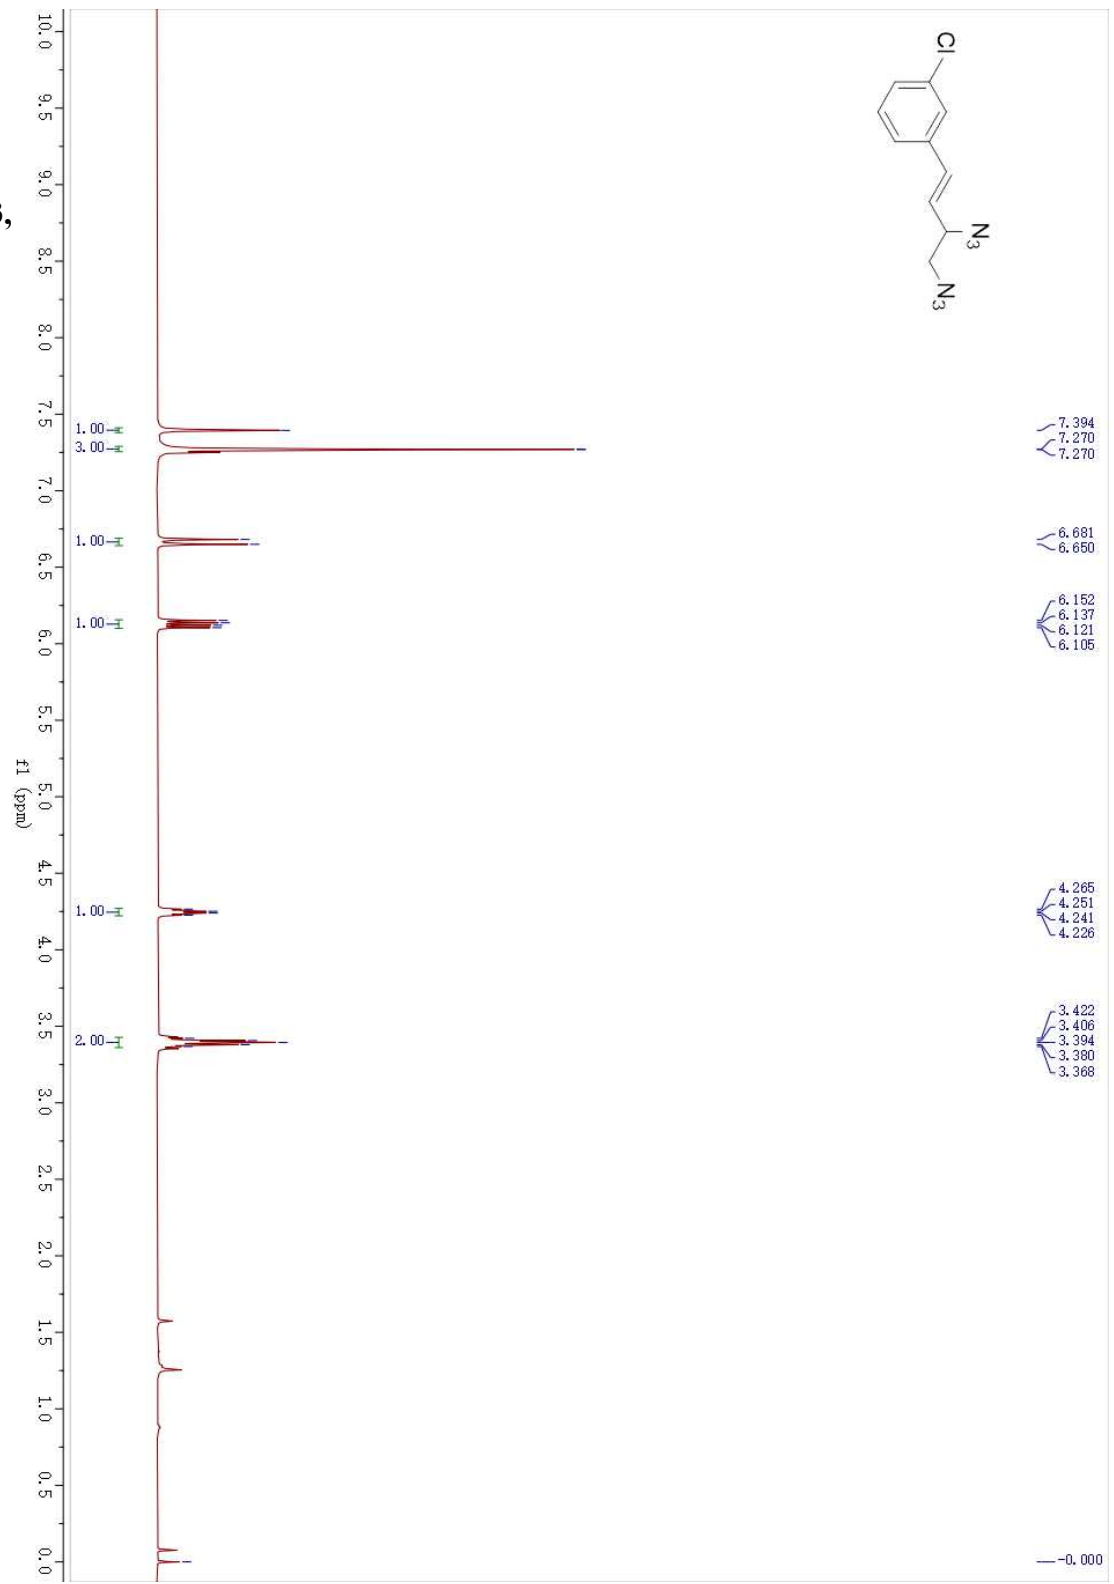

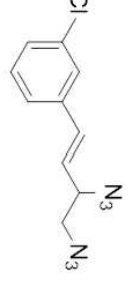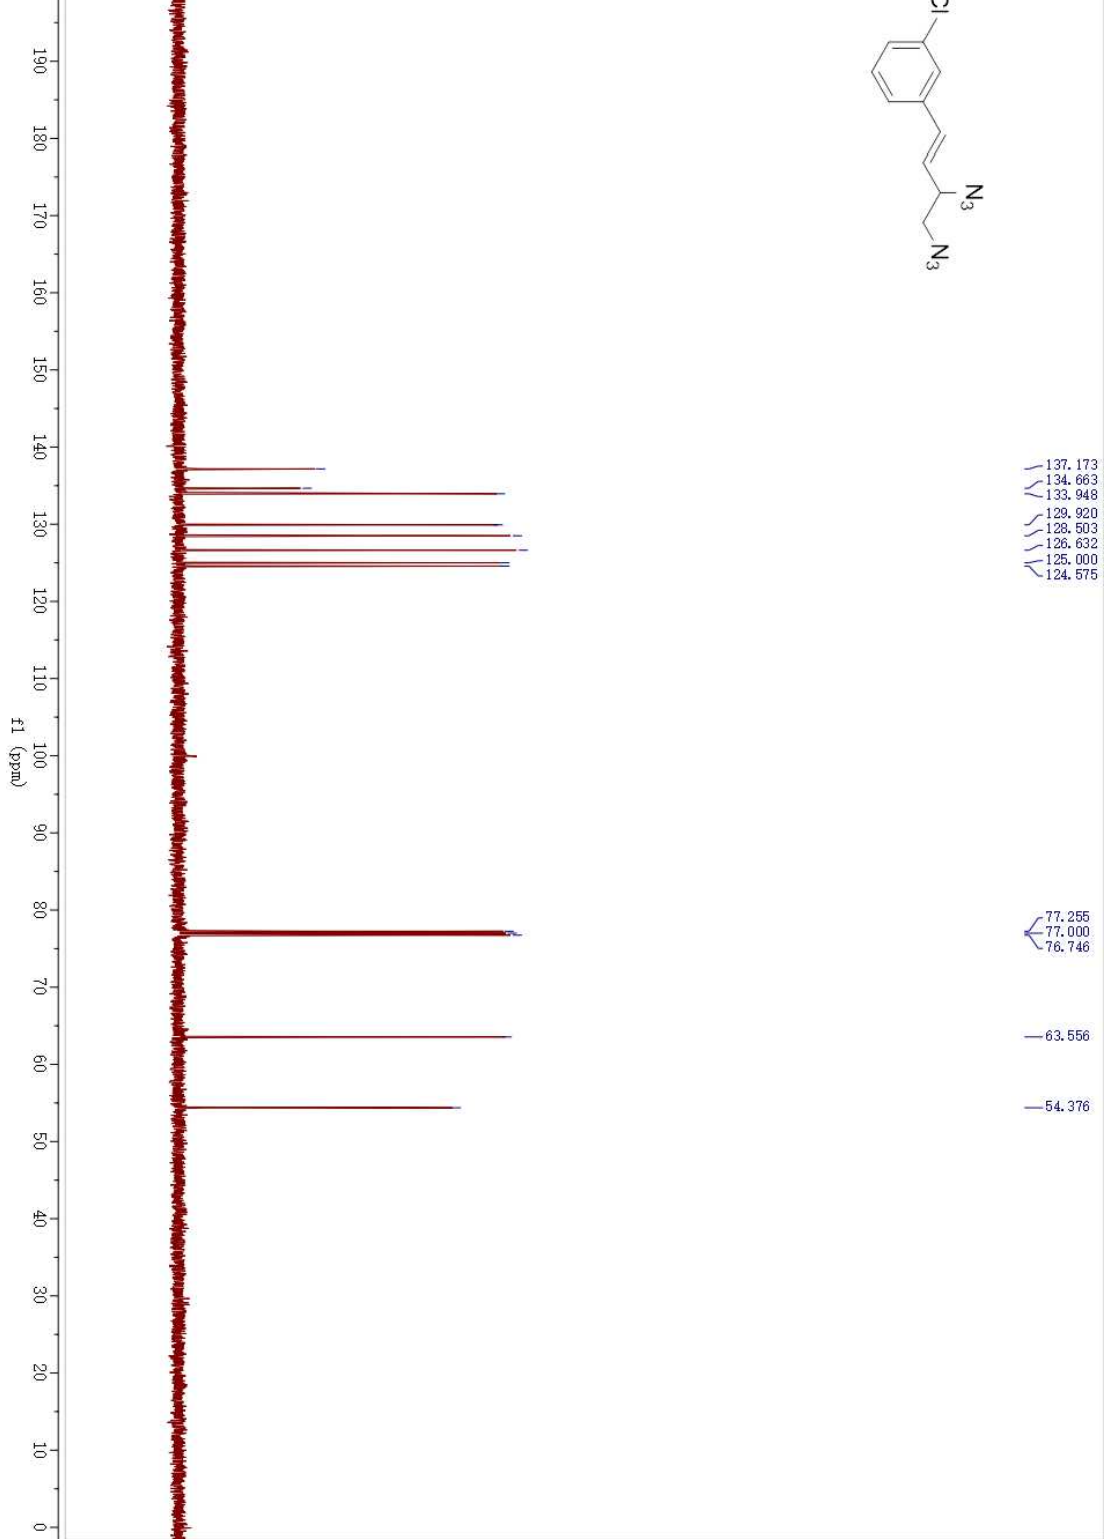

**(E)-1-(3,4-diazido**

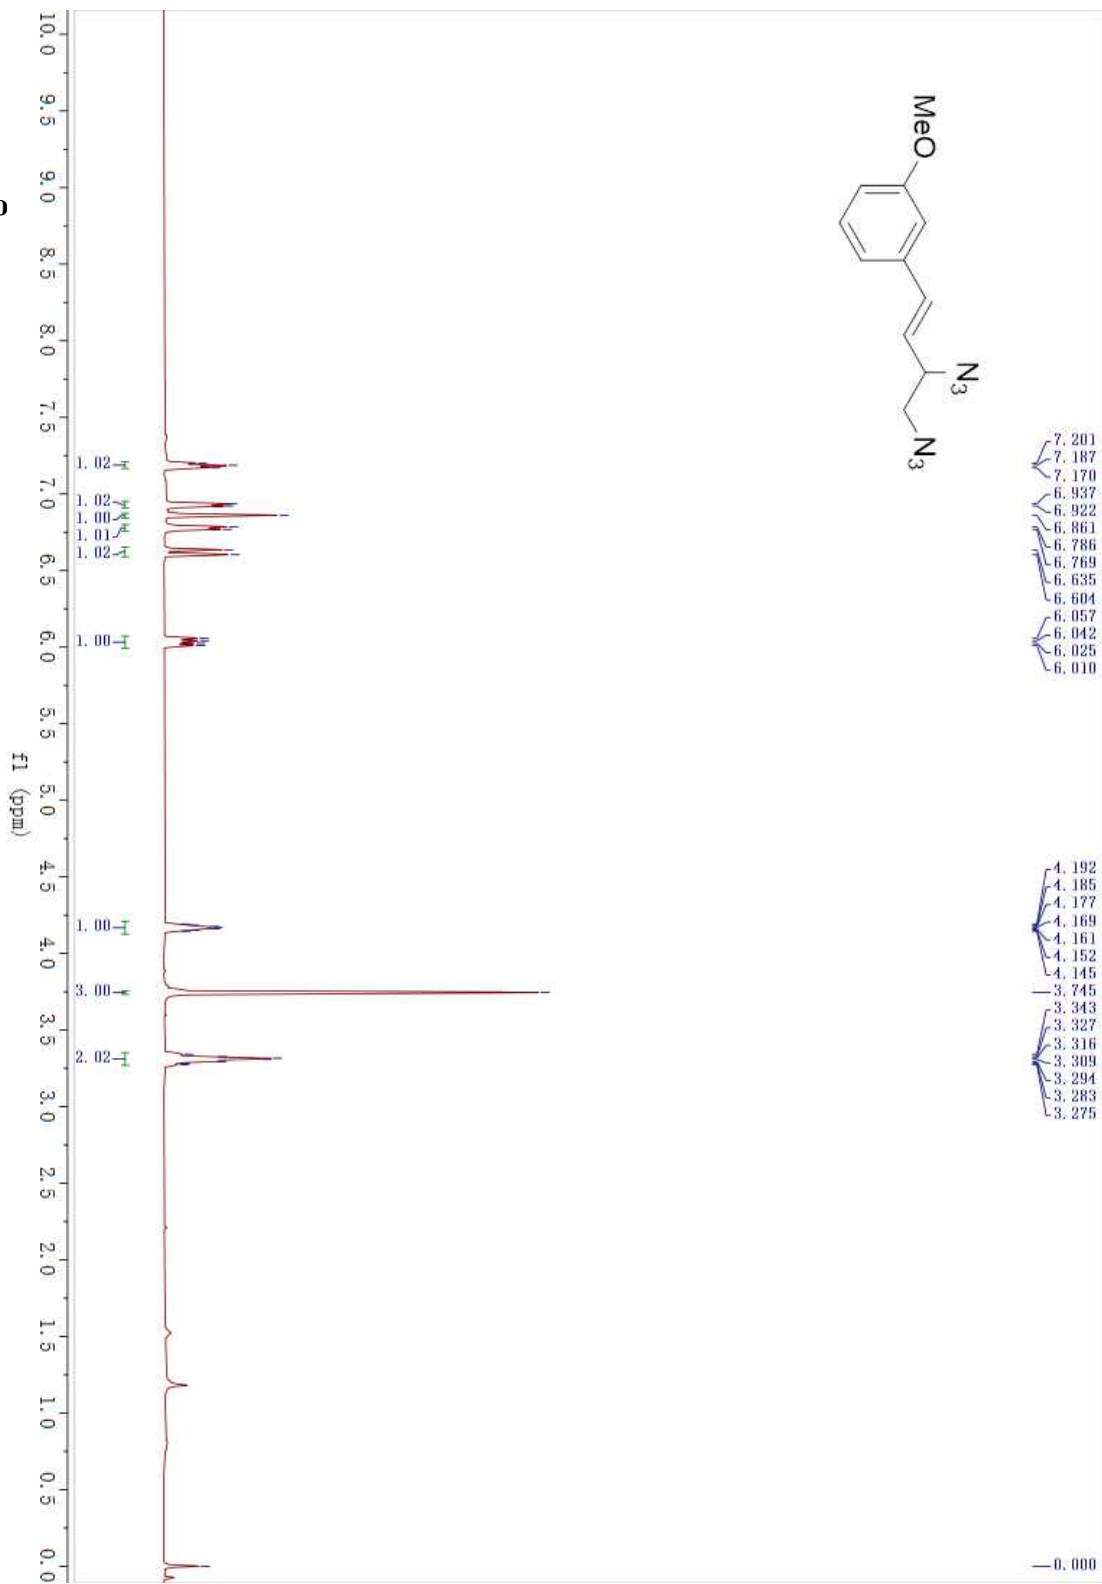

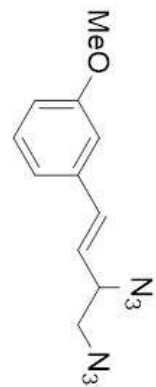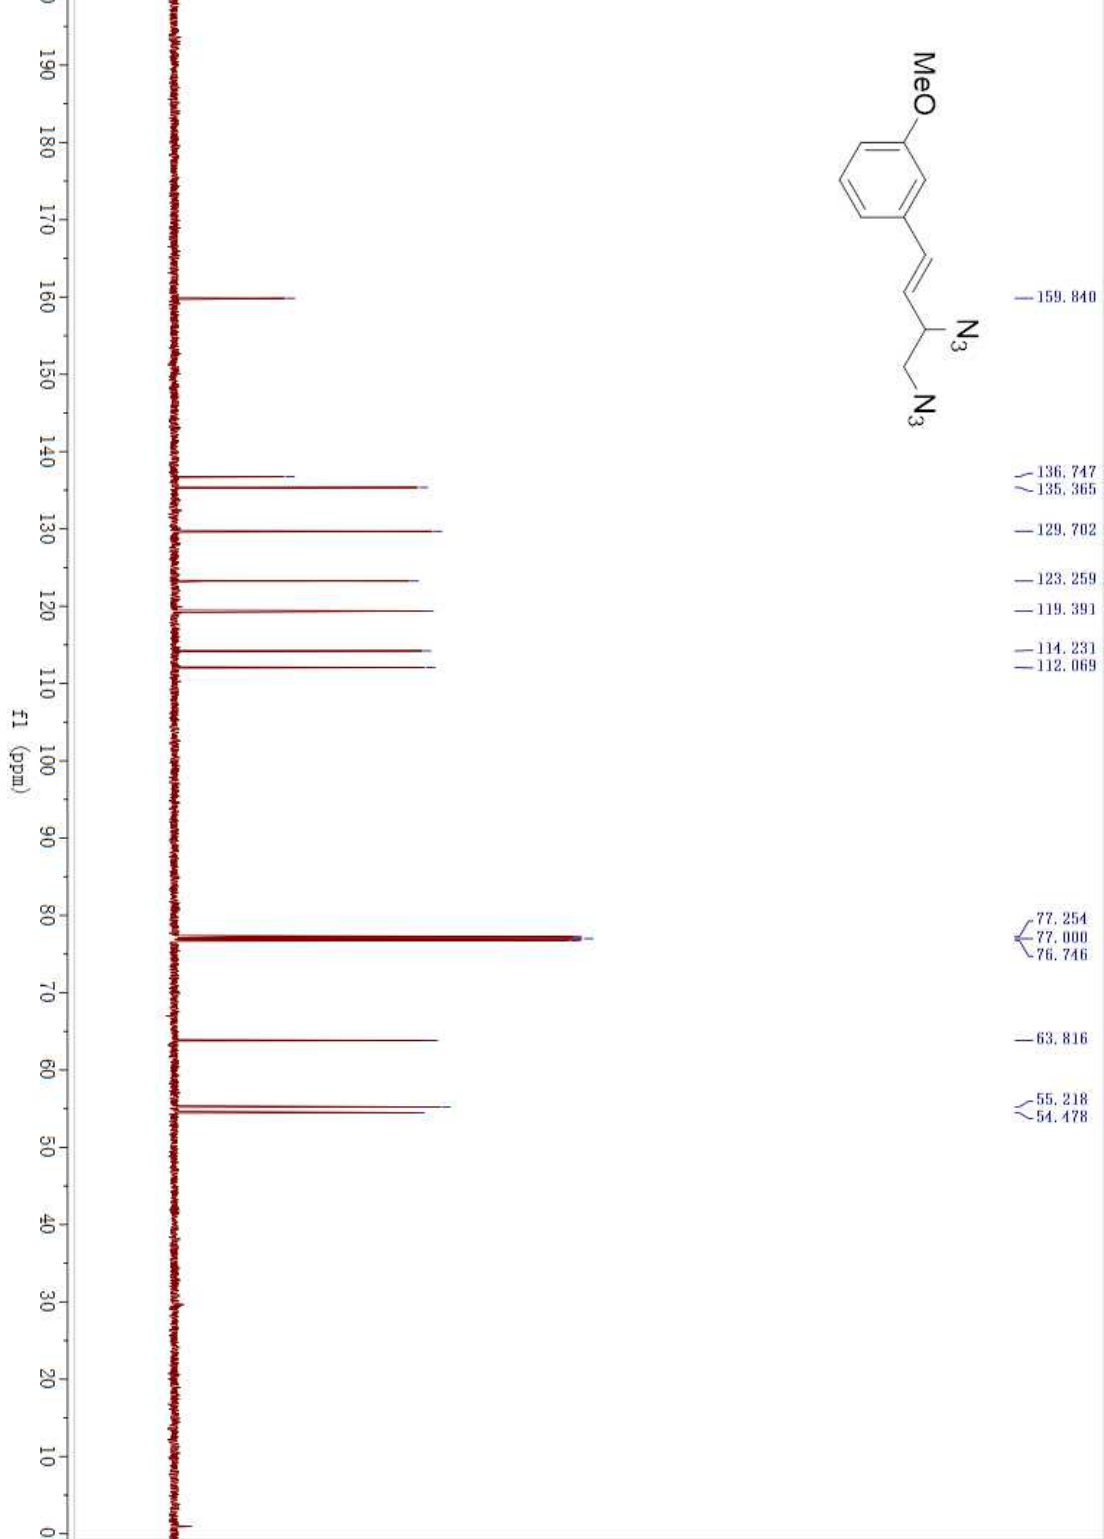

**(E)-1-(3,4-diazido**

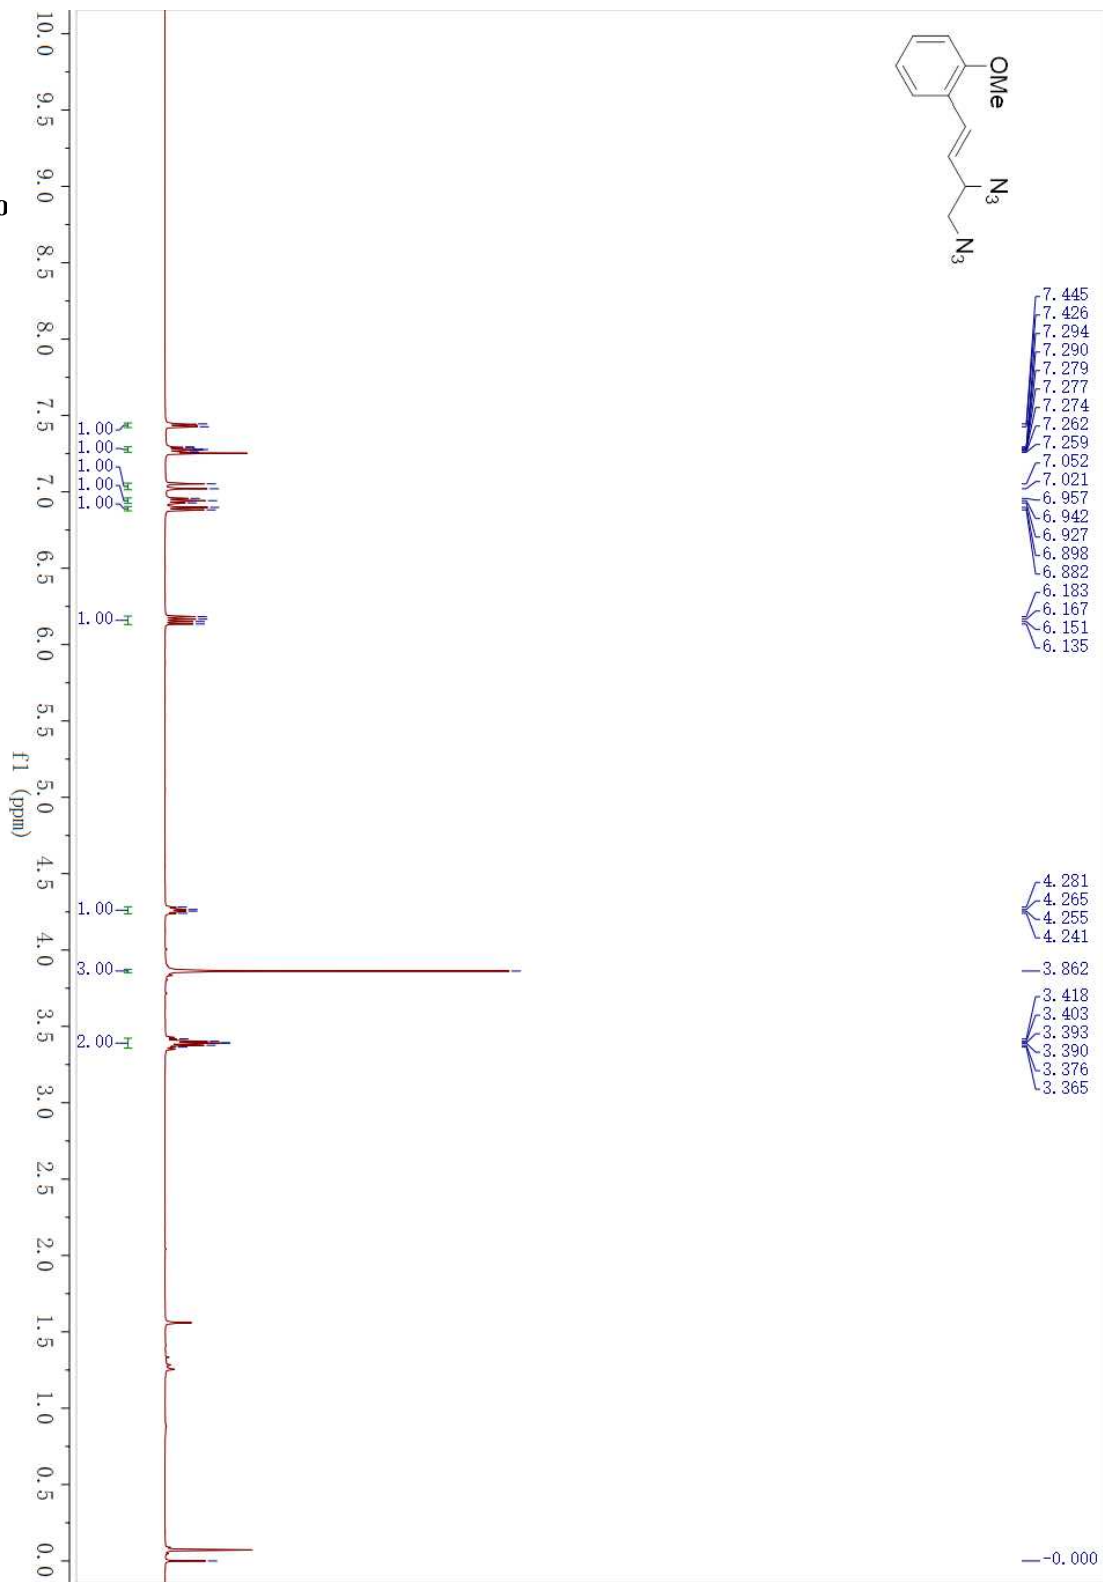

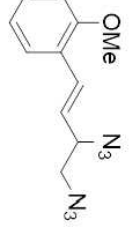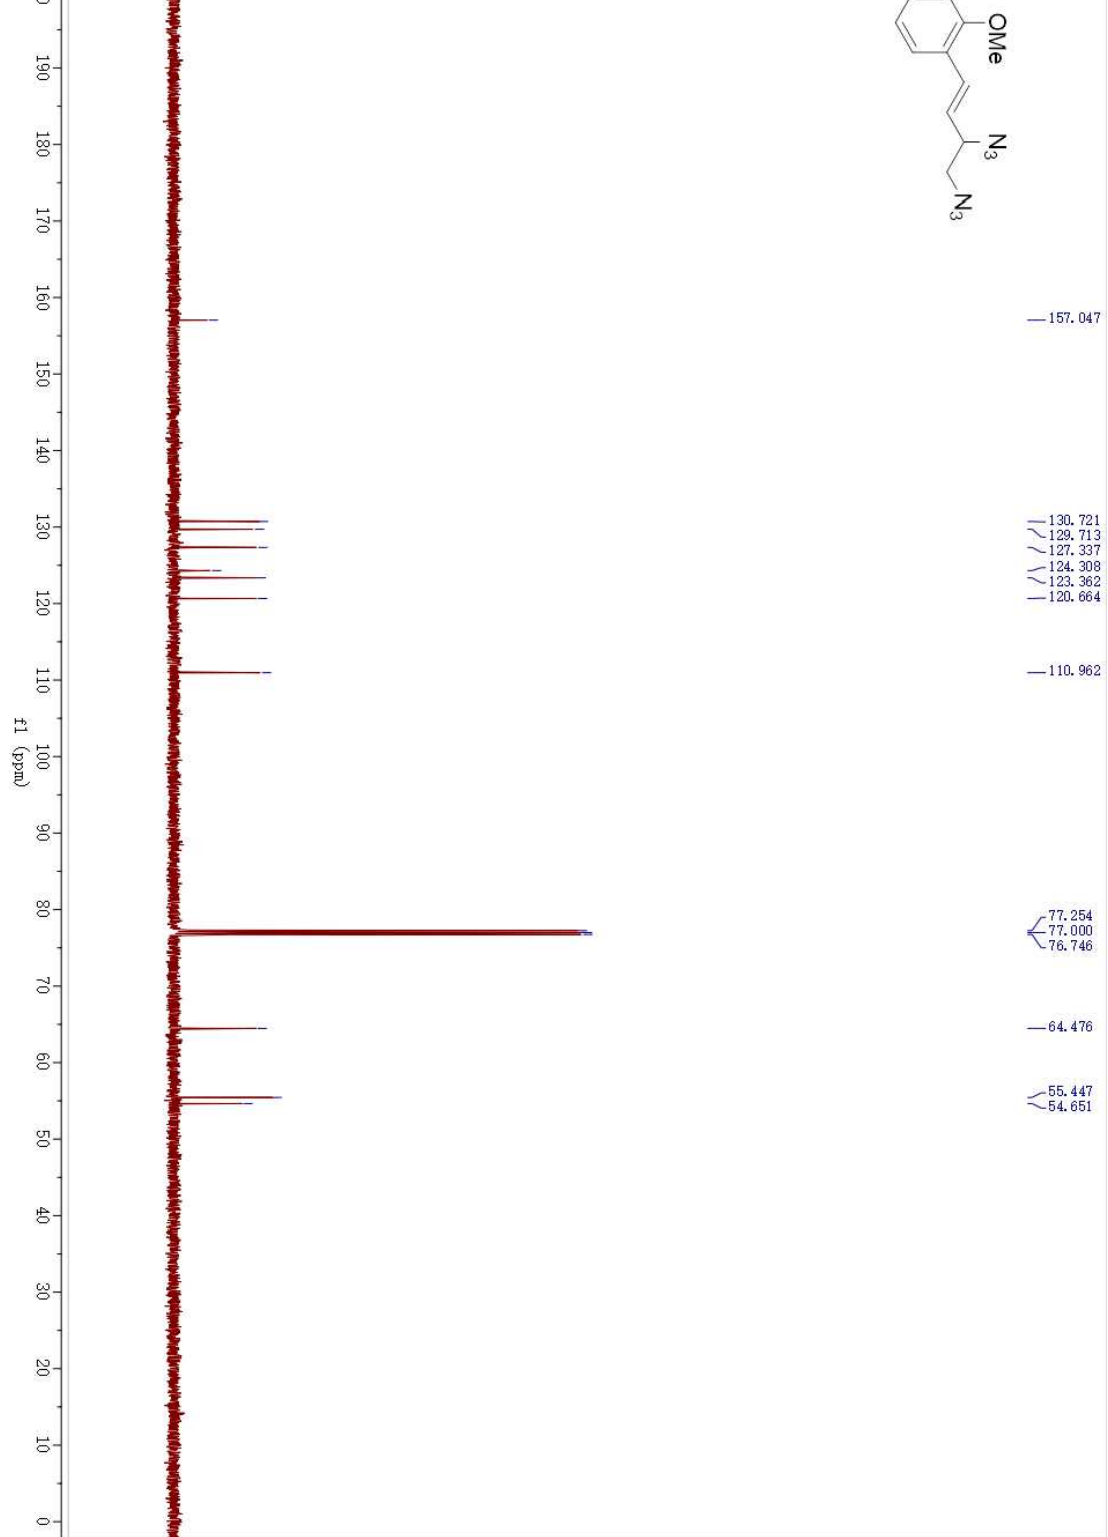



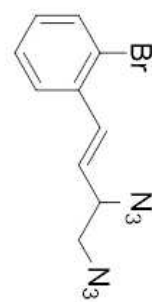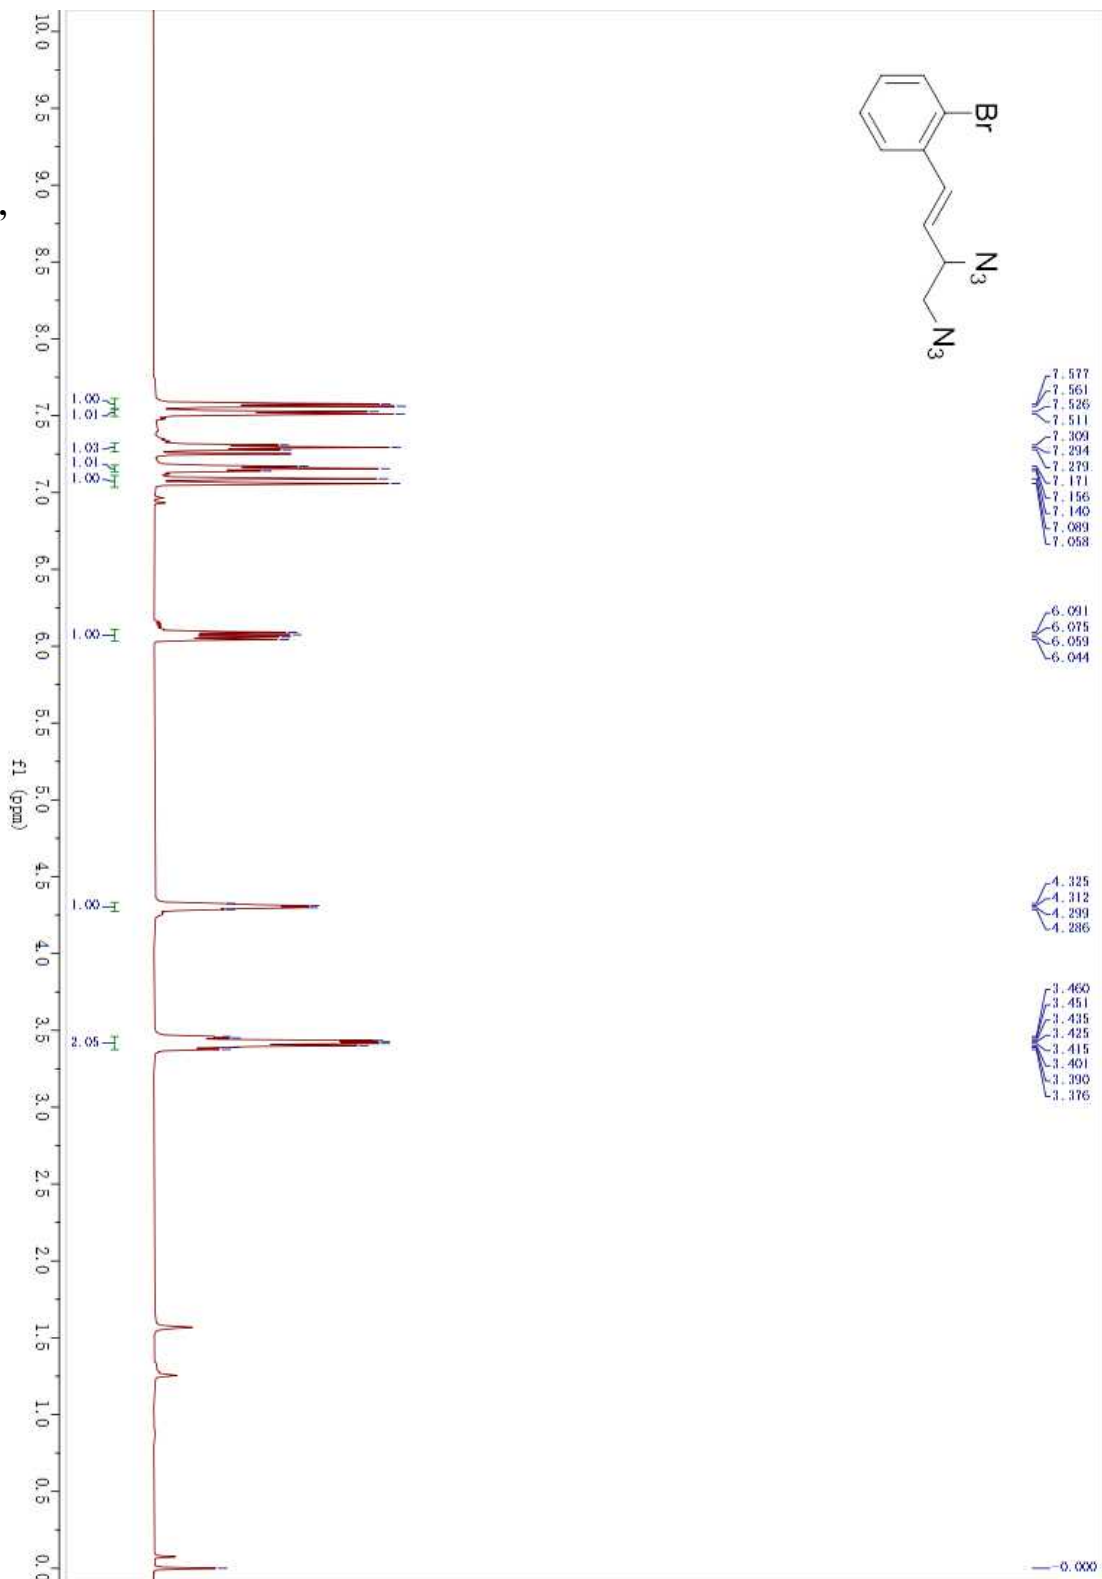

**(E)-1-bromo-3-(3-**

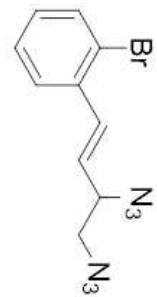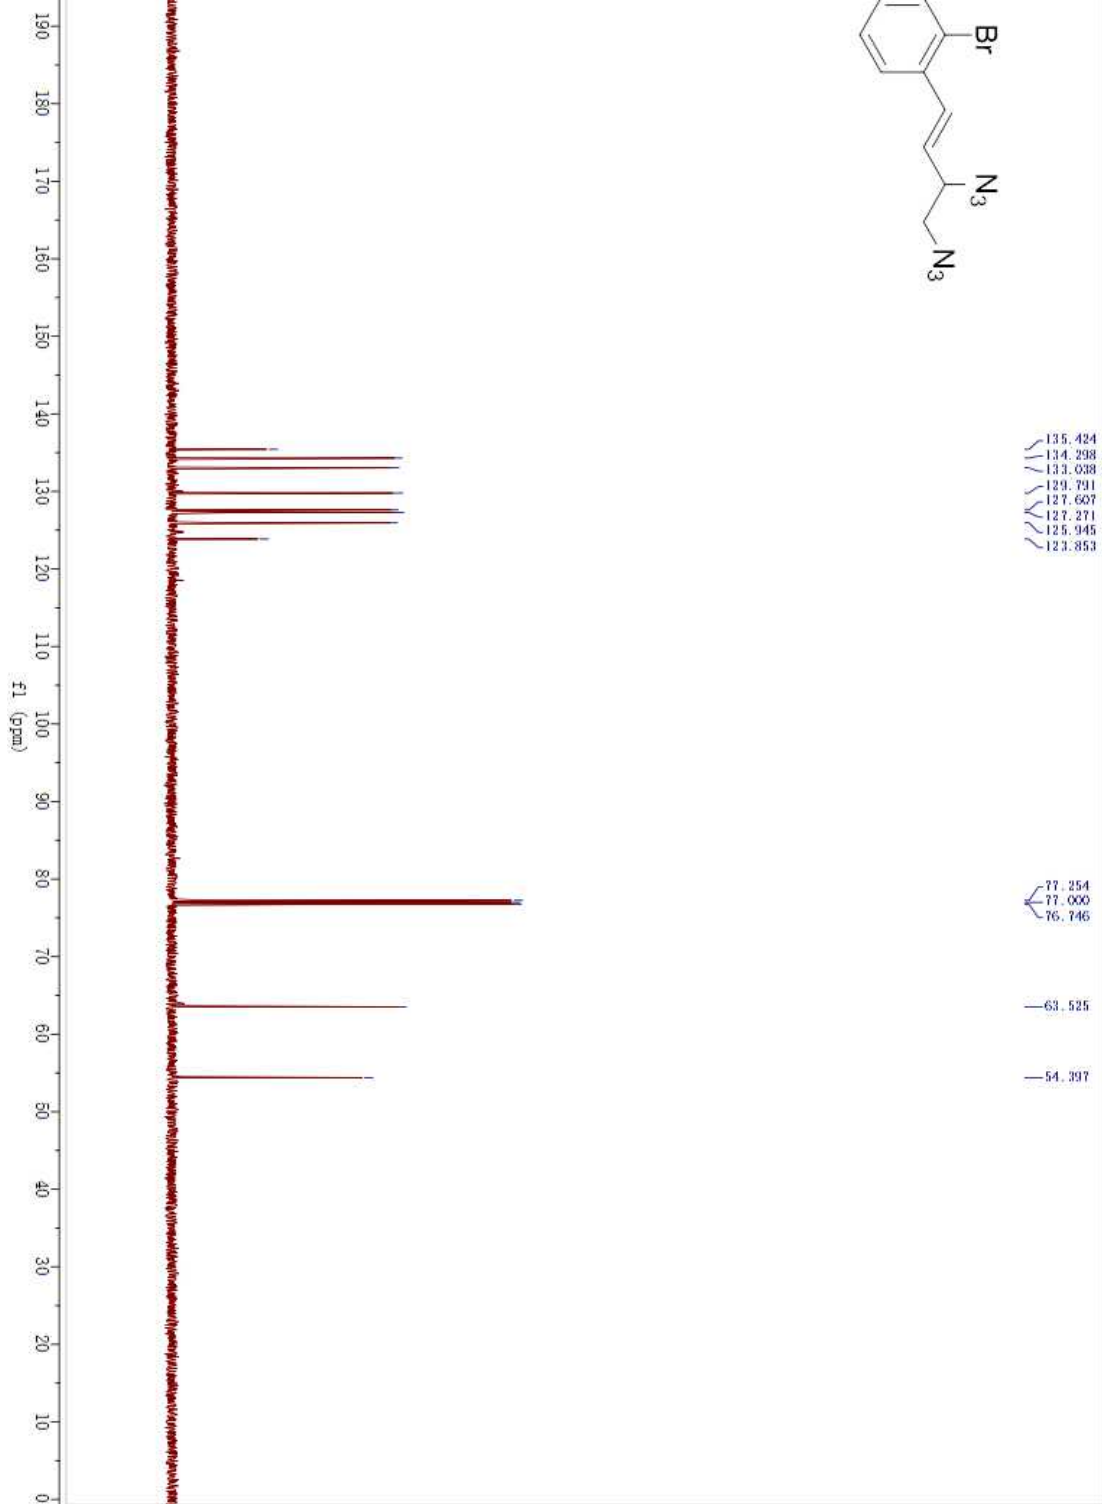

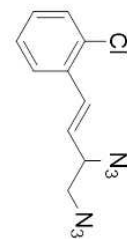

**(E)-1-chloro-2-(3,**

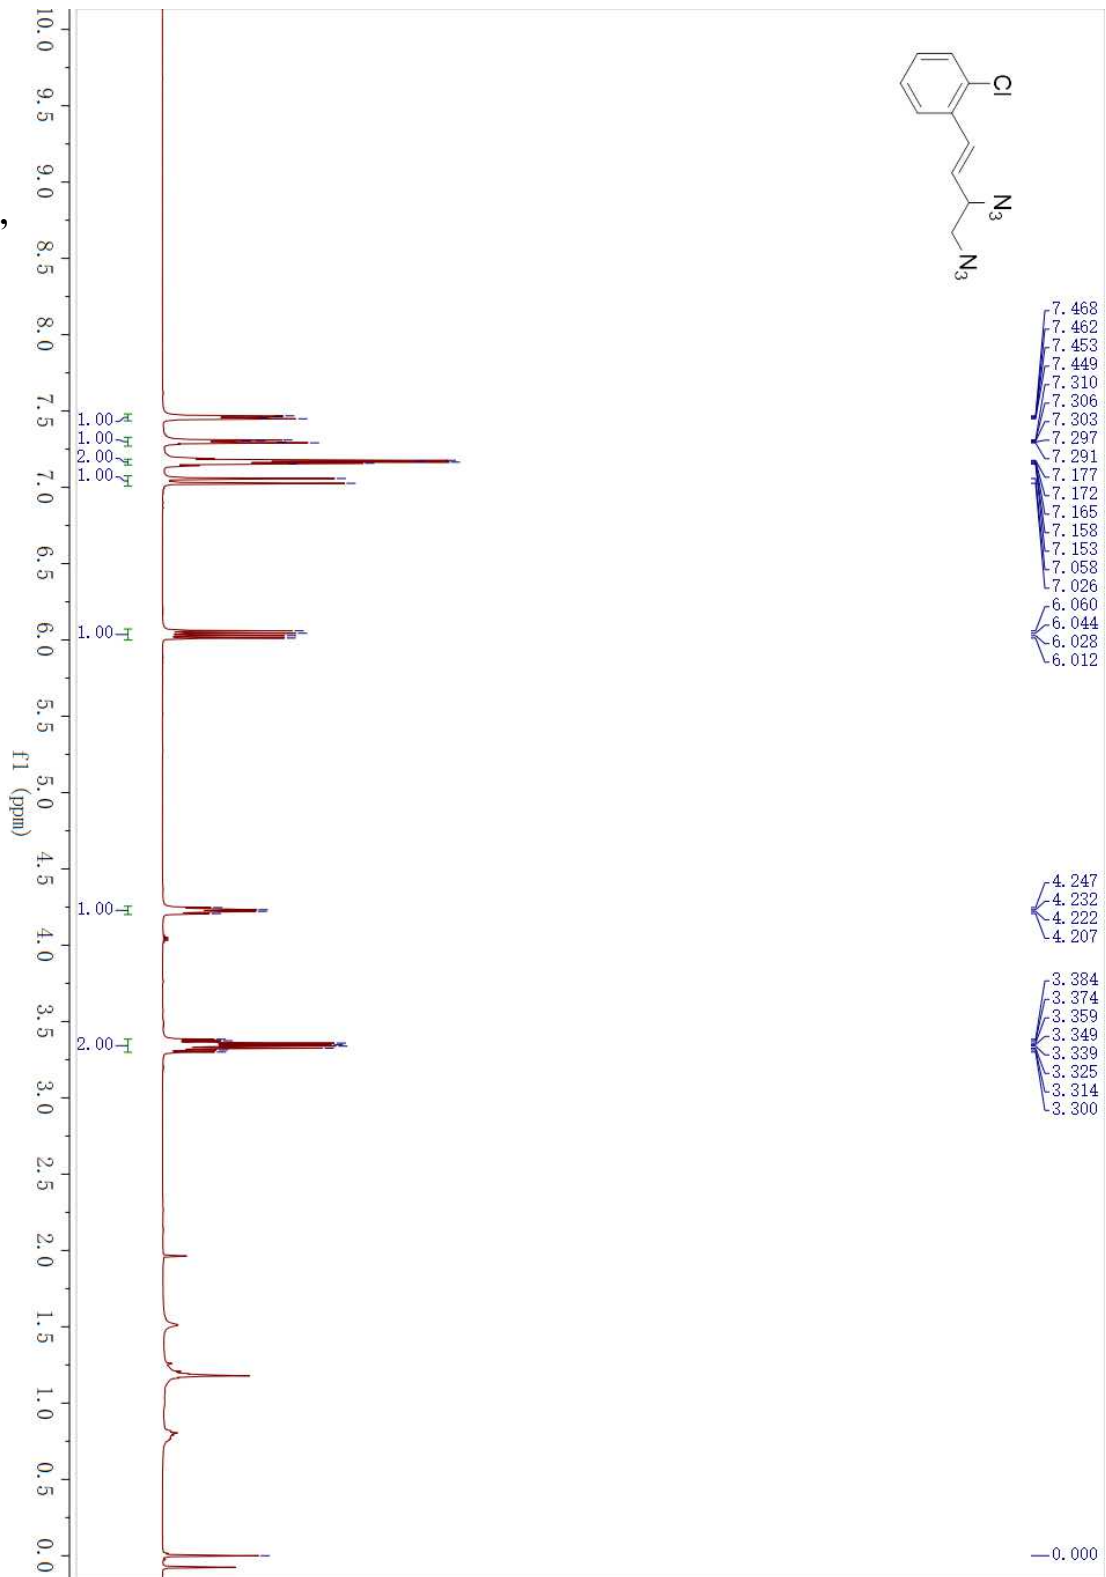

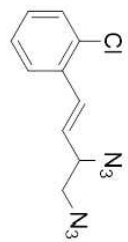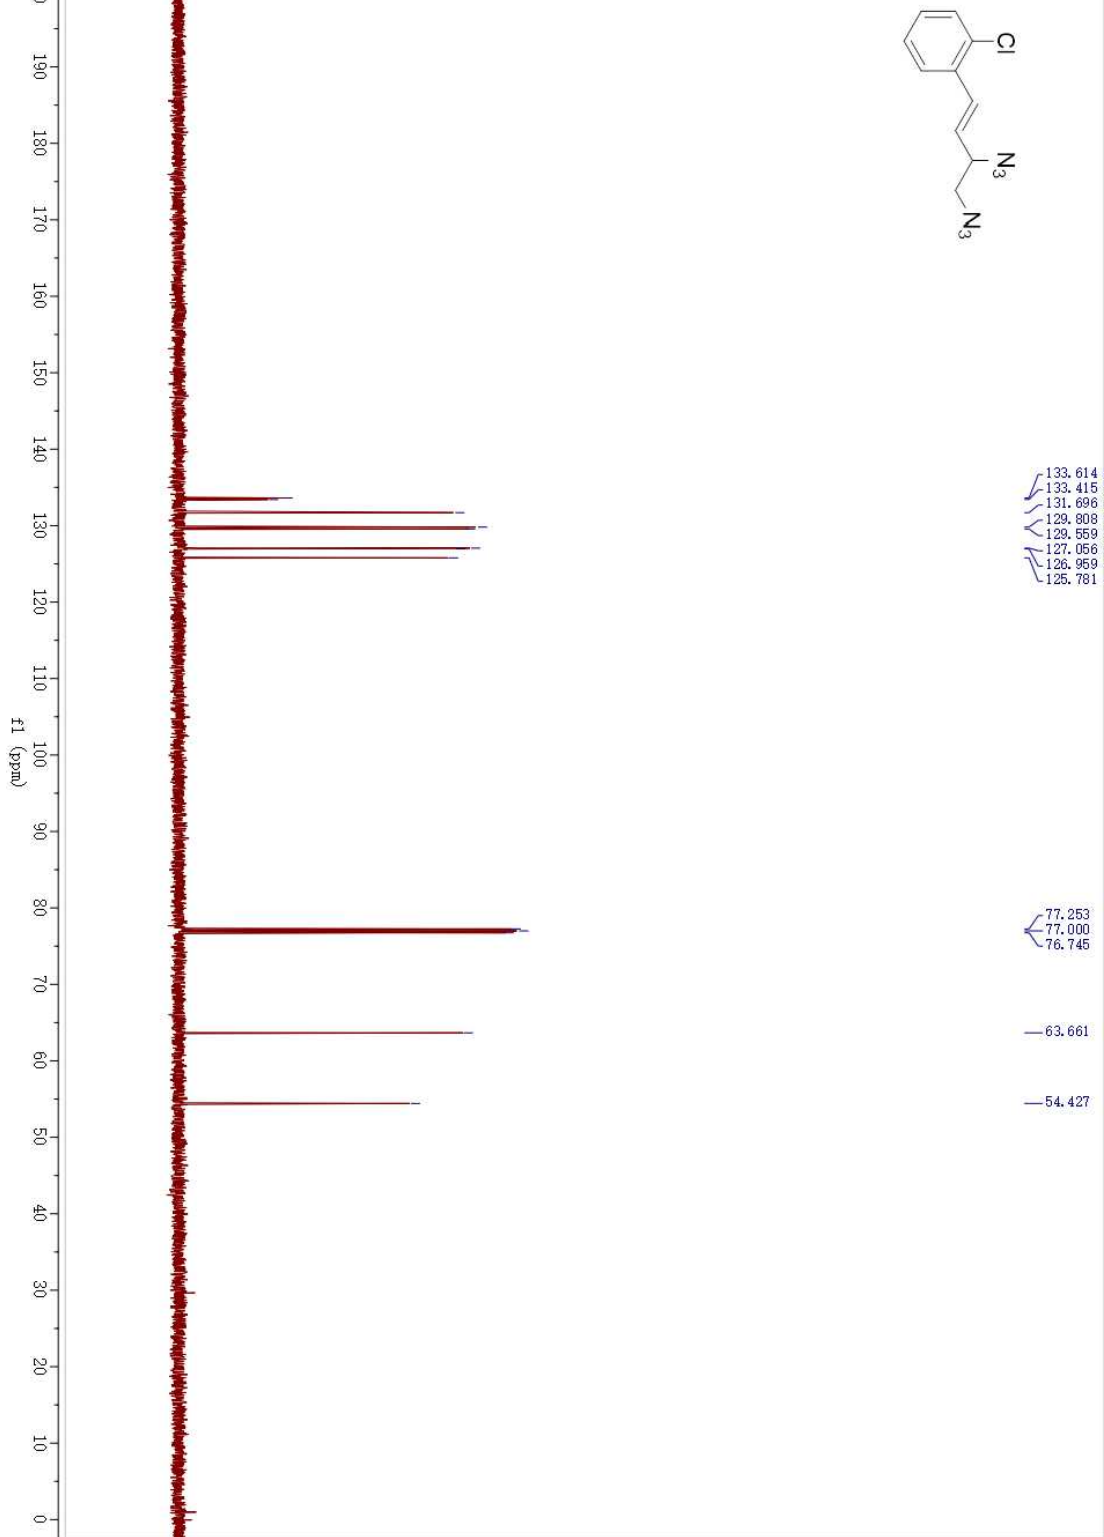

**(E)-4-(3,4-diazido**

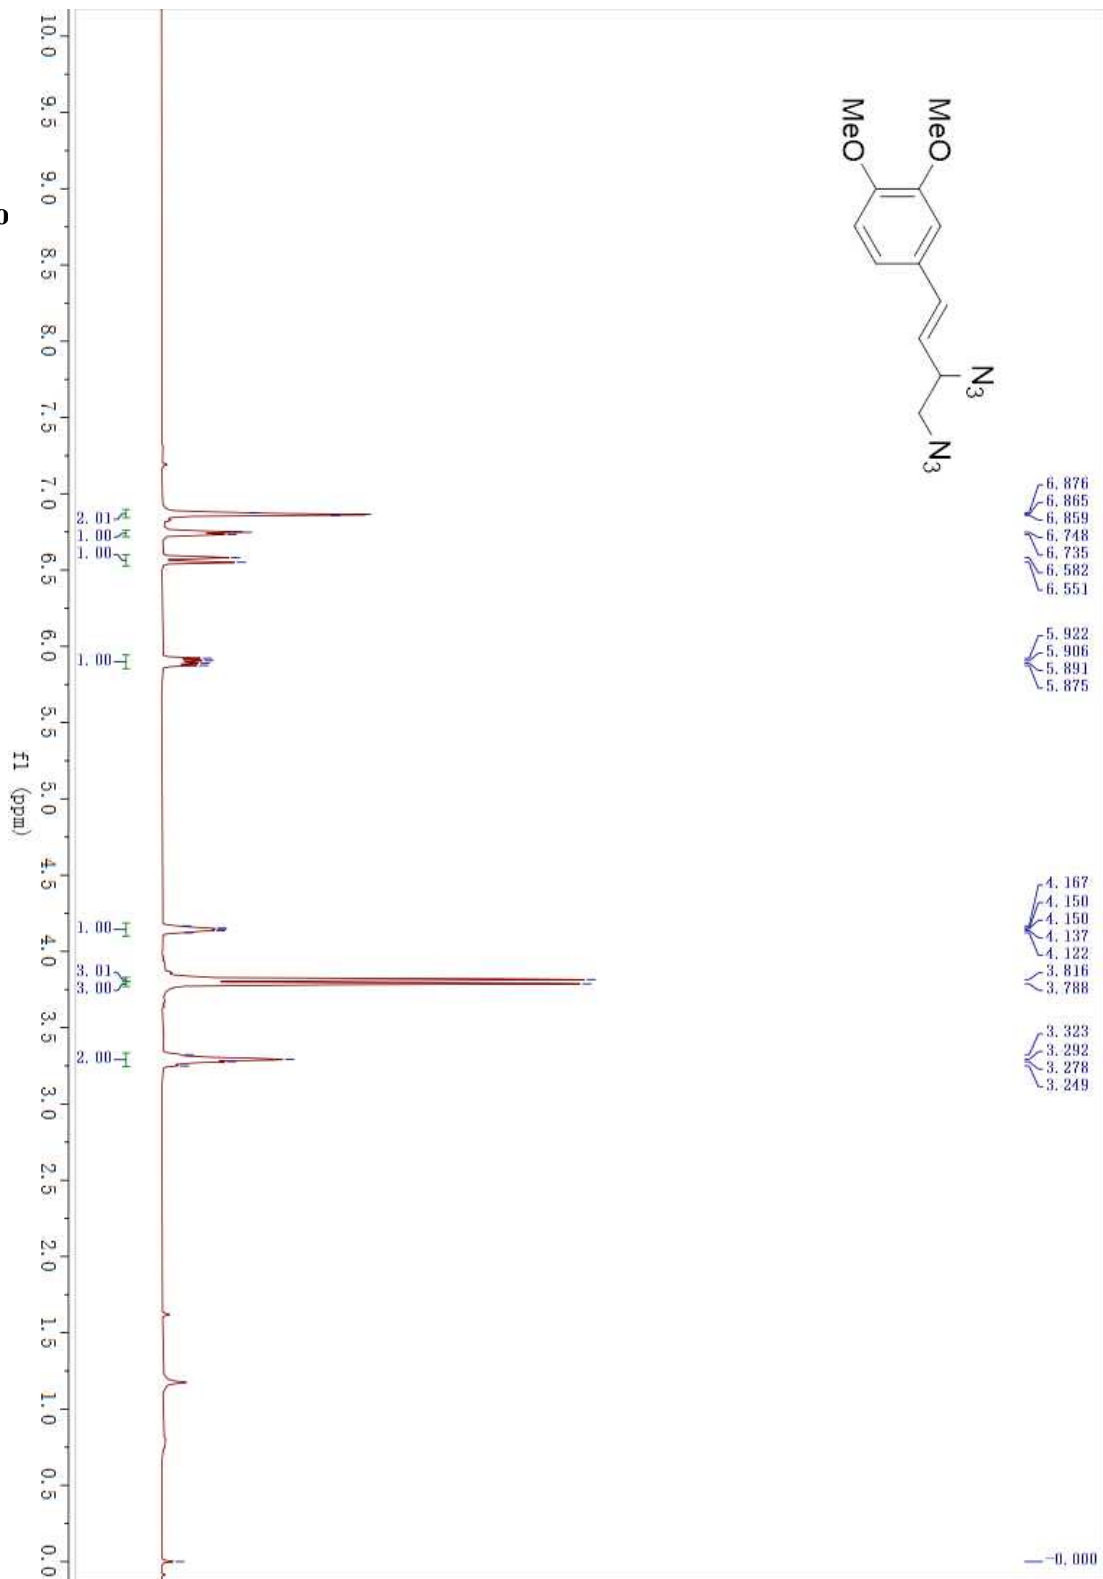

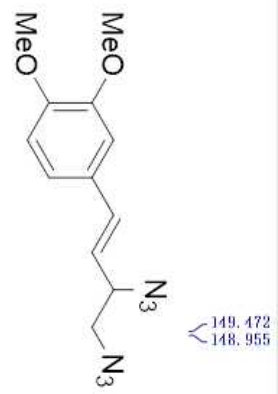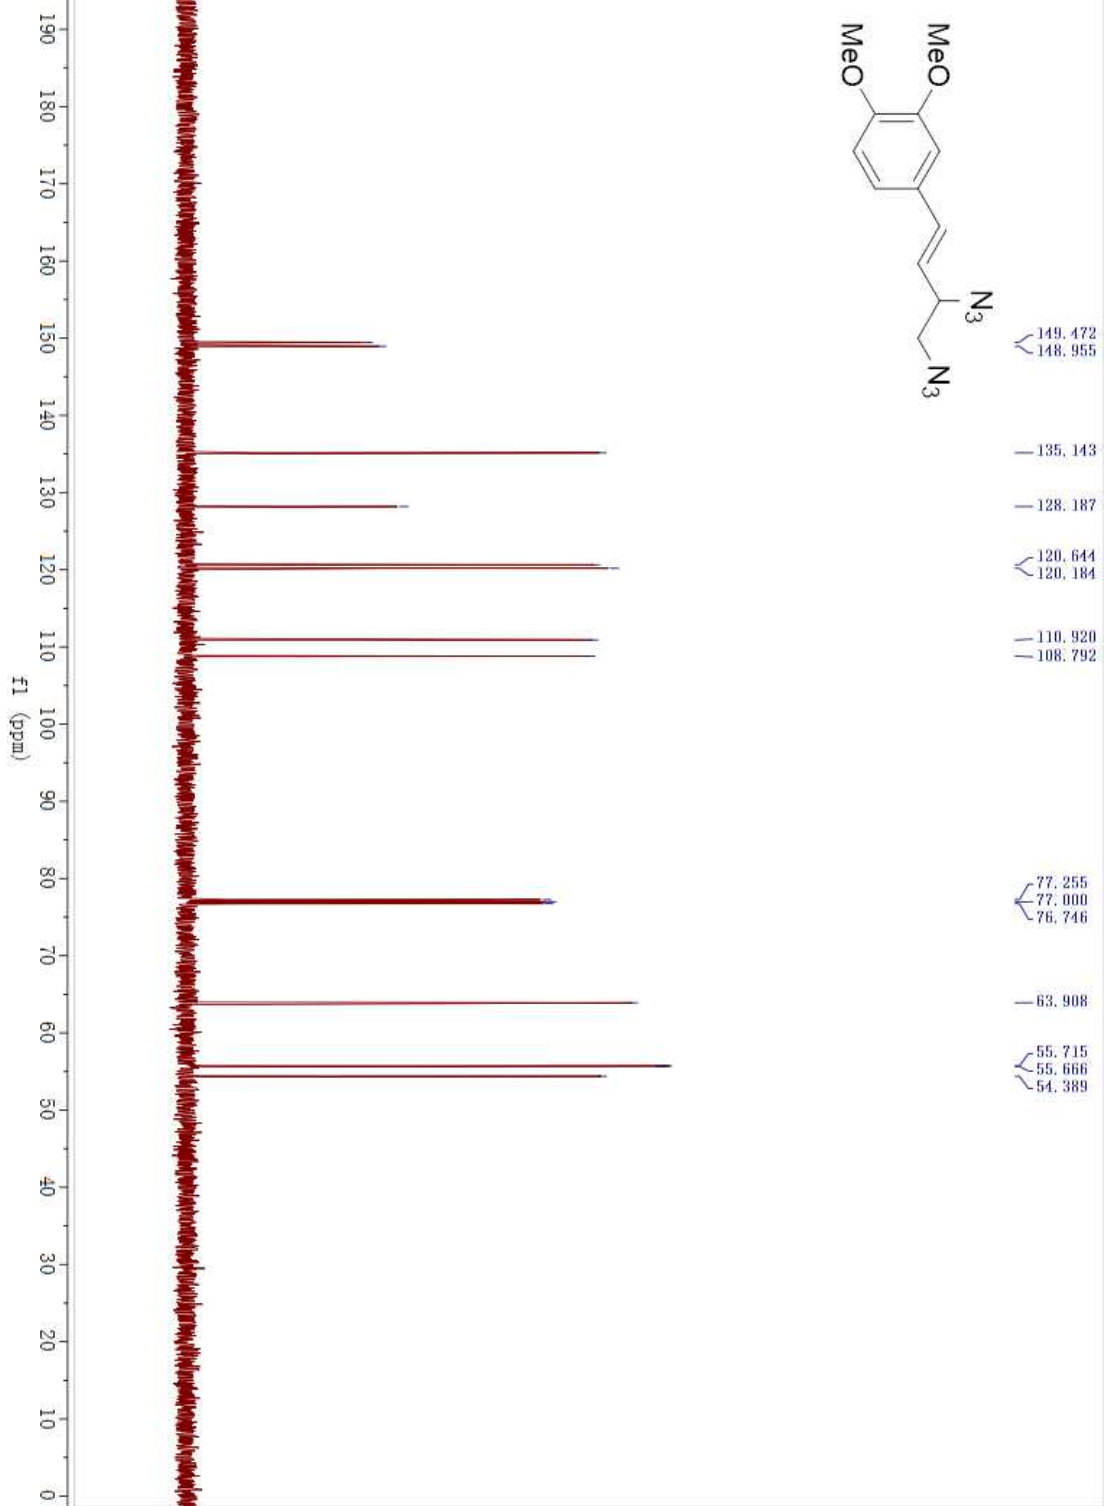

**(E)-2-(3,4-diazido**

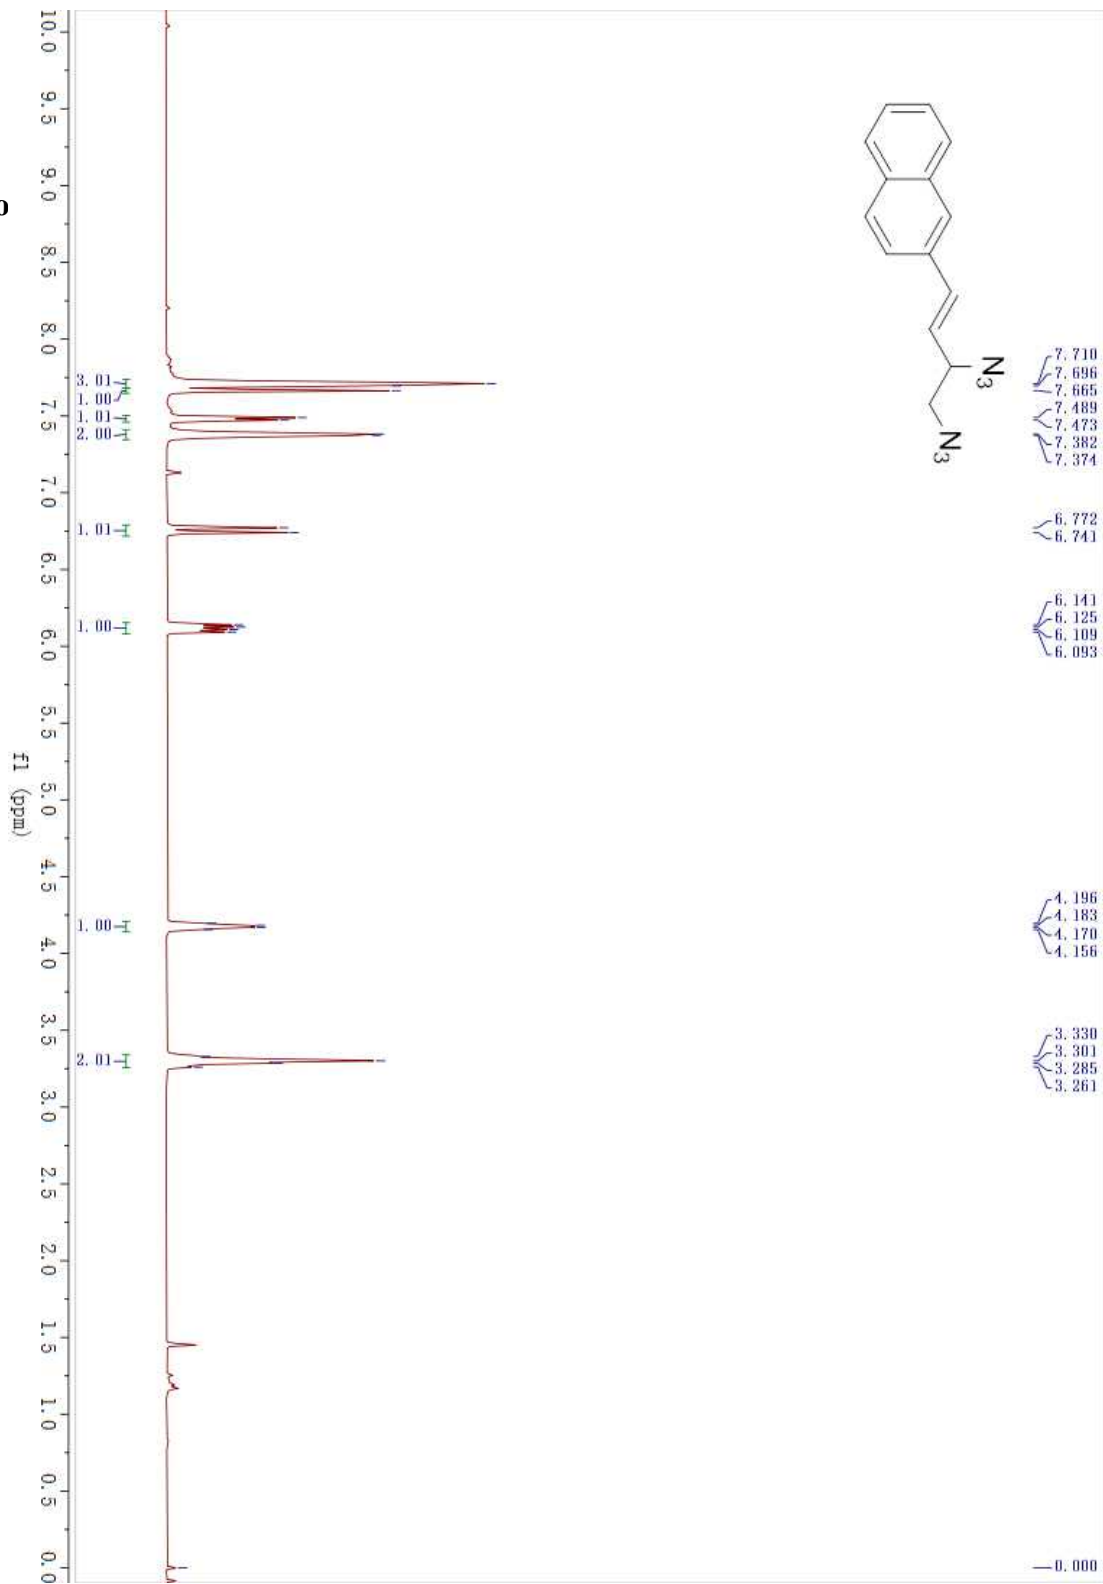

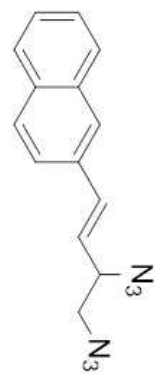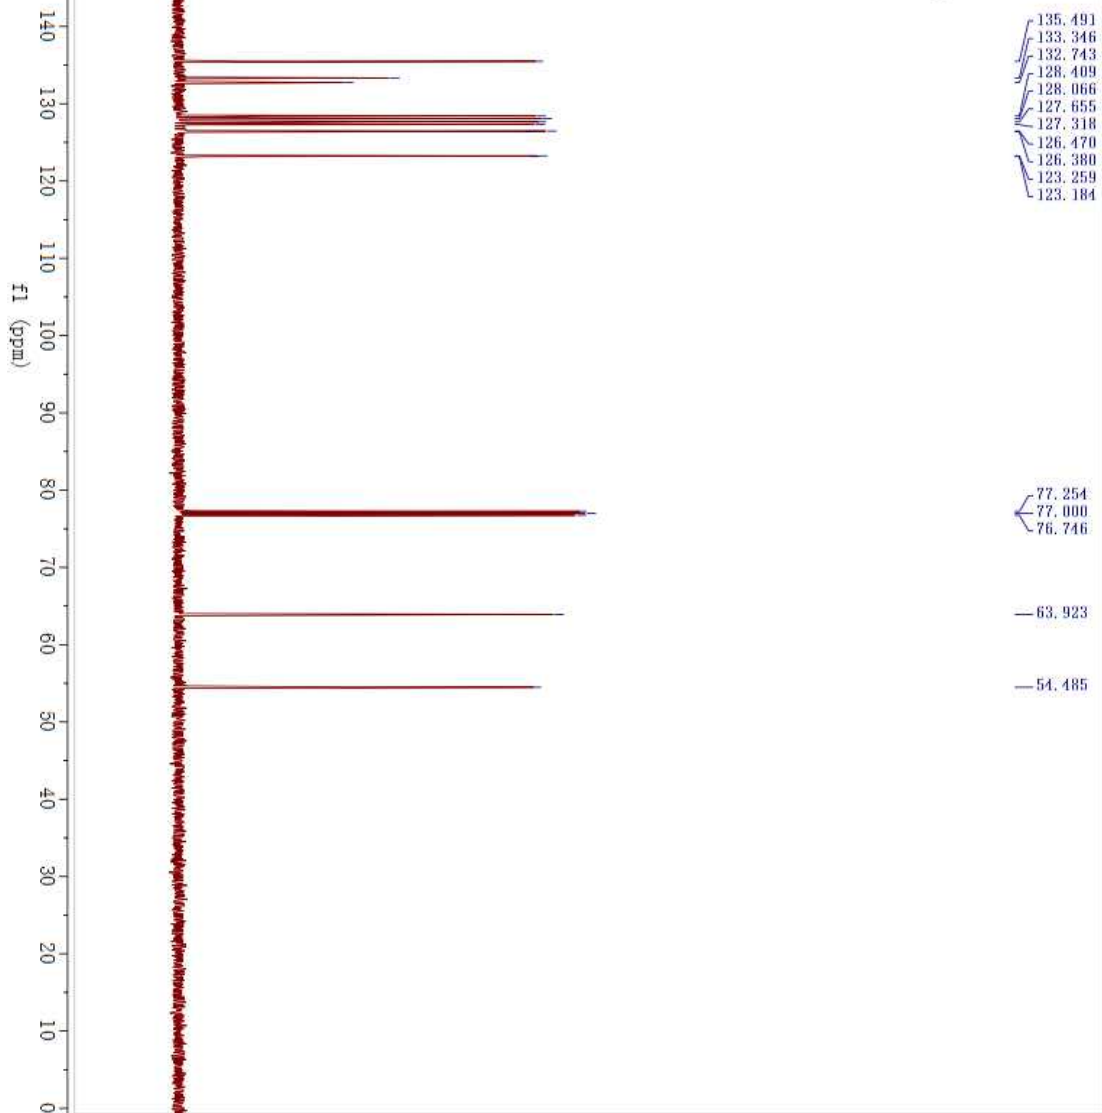



**(E)-9-(3,4-diazido**

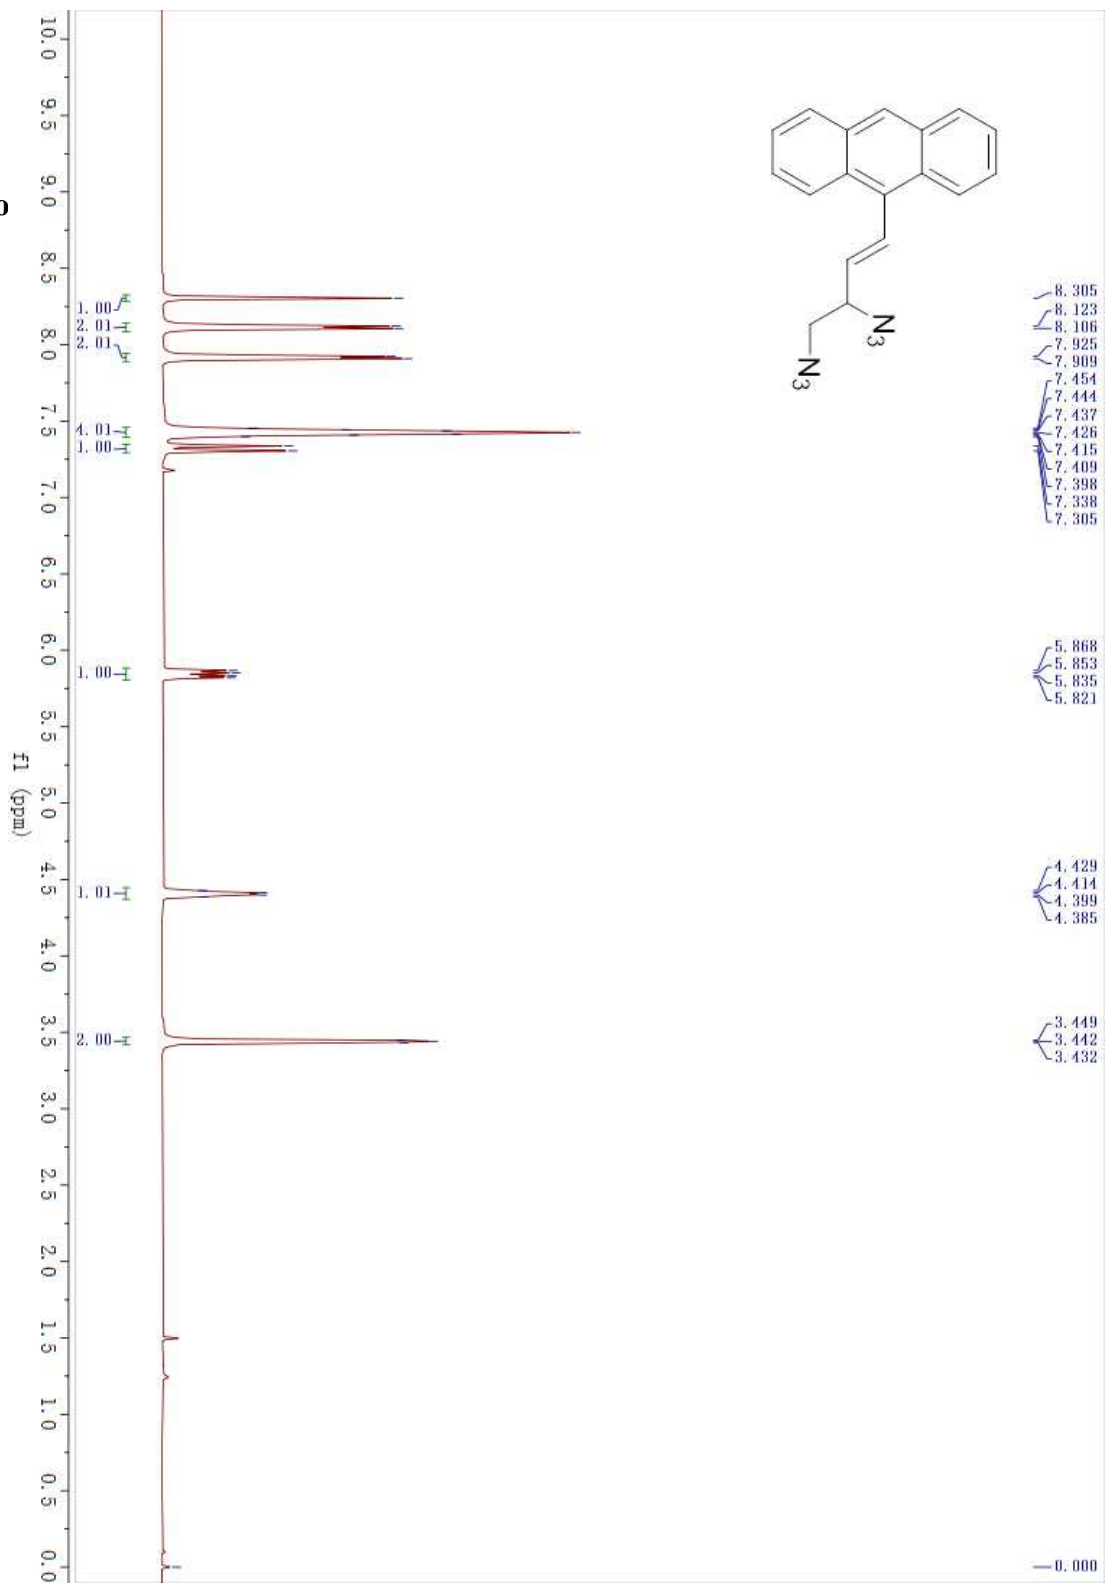

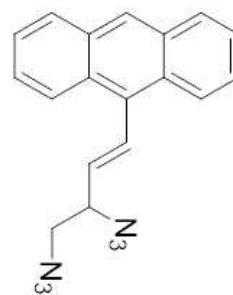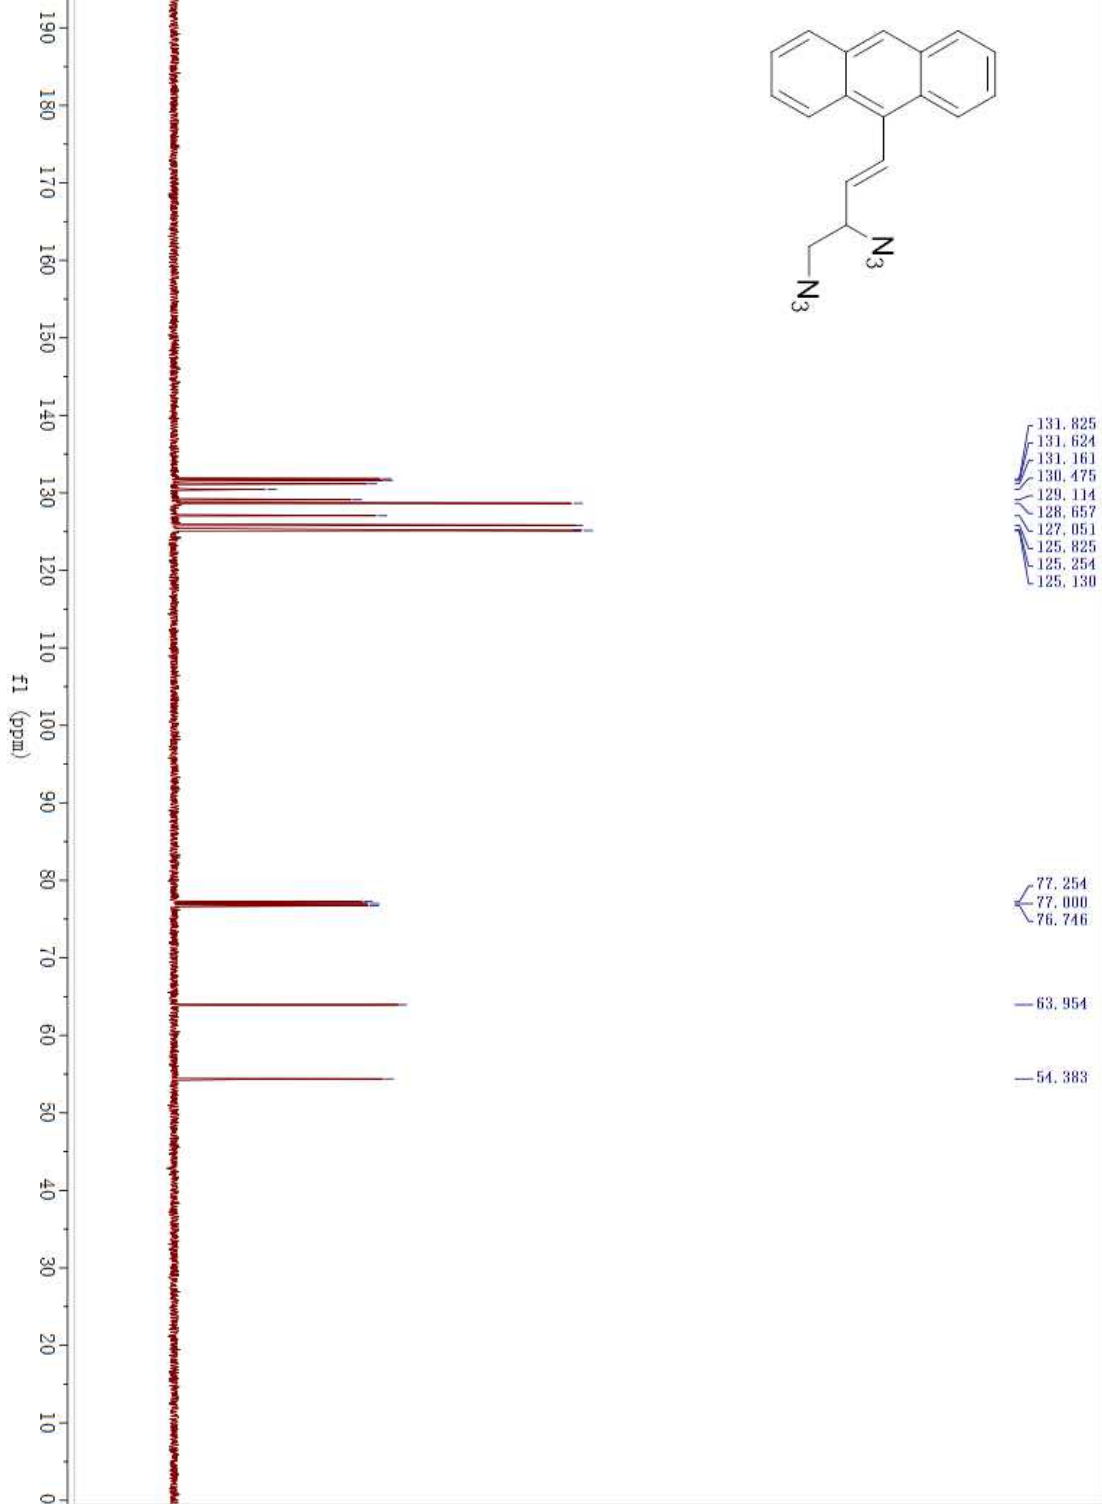

**(E)-2-(3,4-diazidoprop-1-en-1-yl)furan**

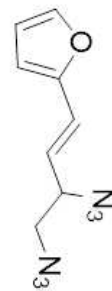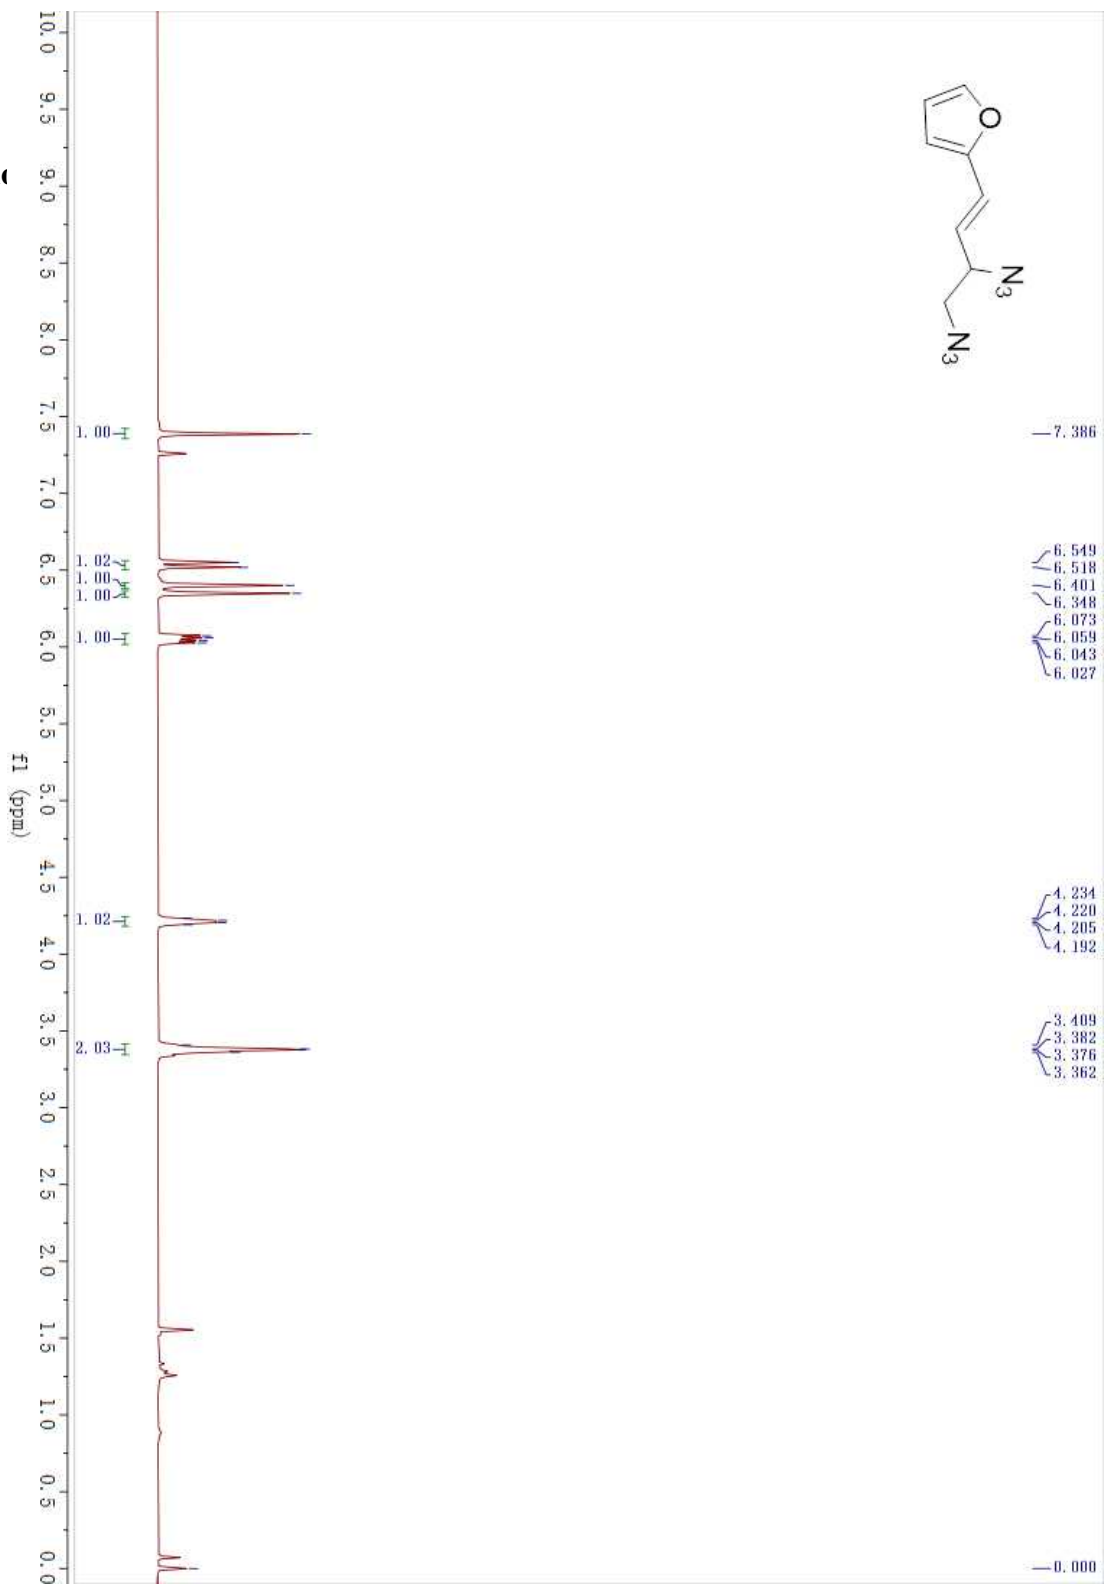

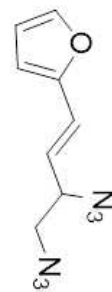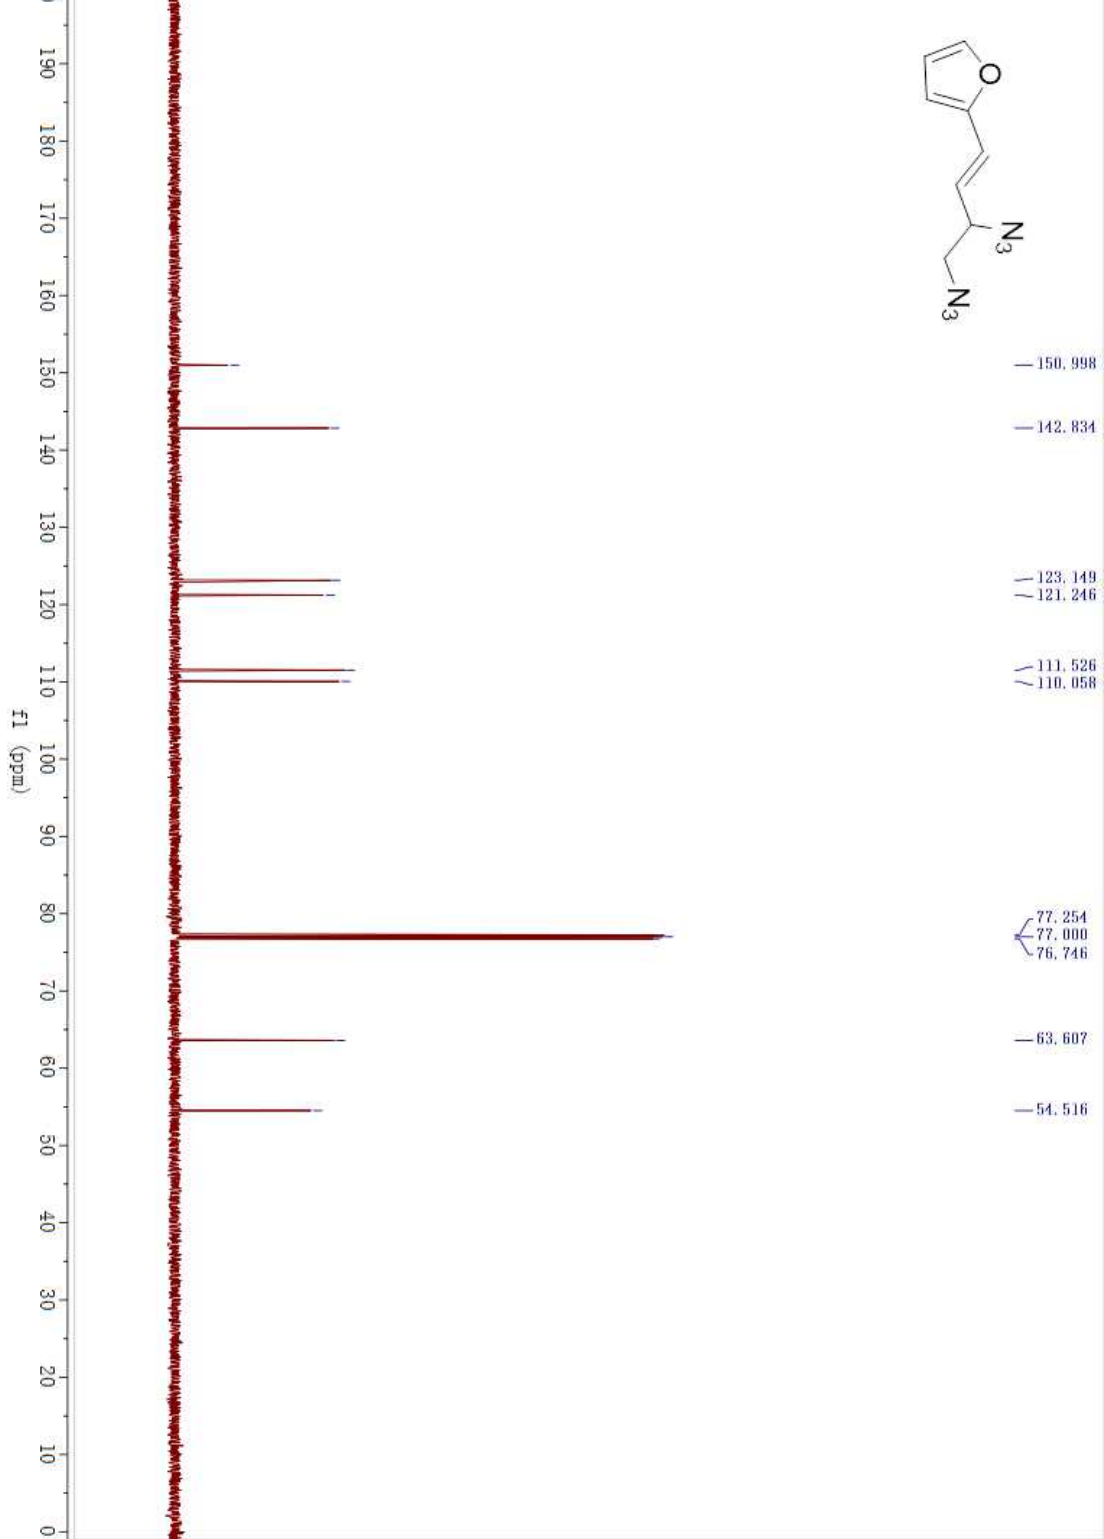

**(E)-(3,4-diazido-2-m**

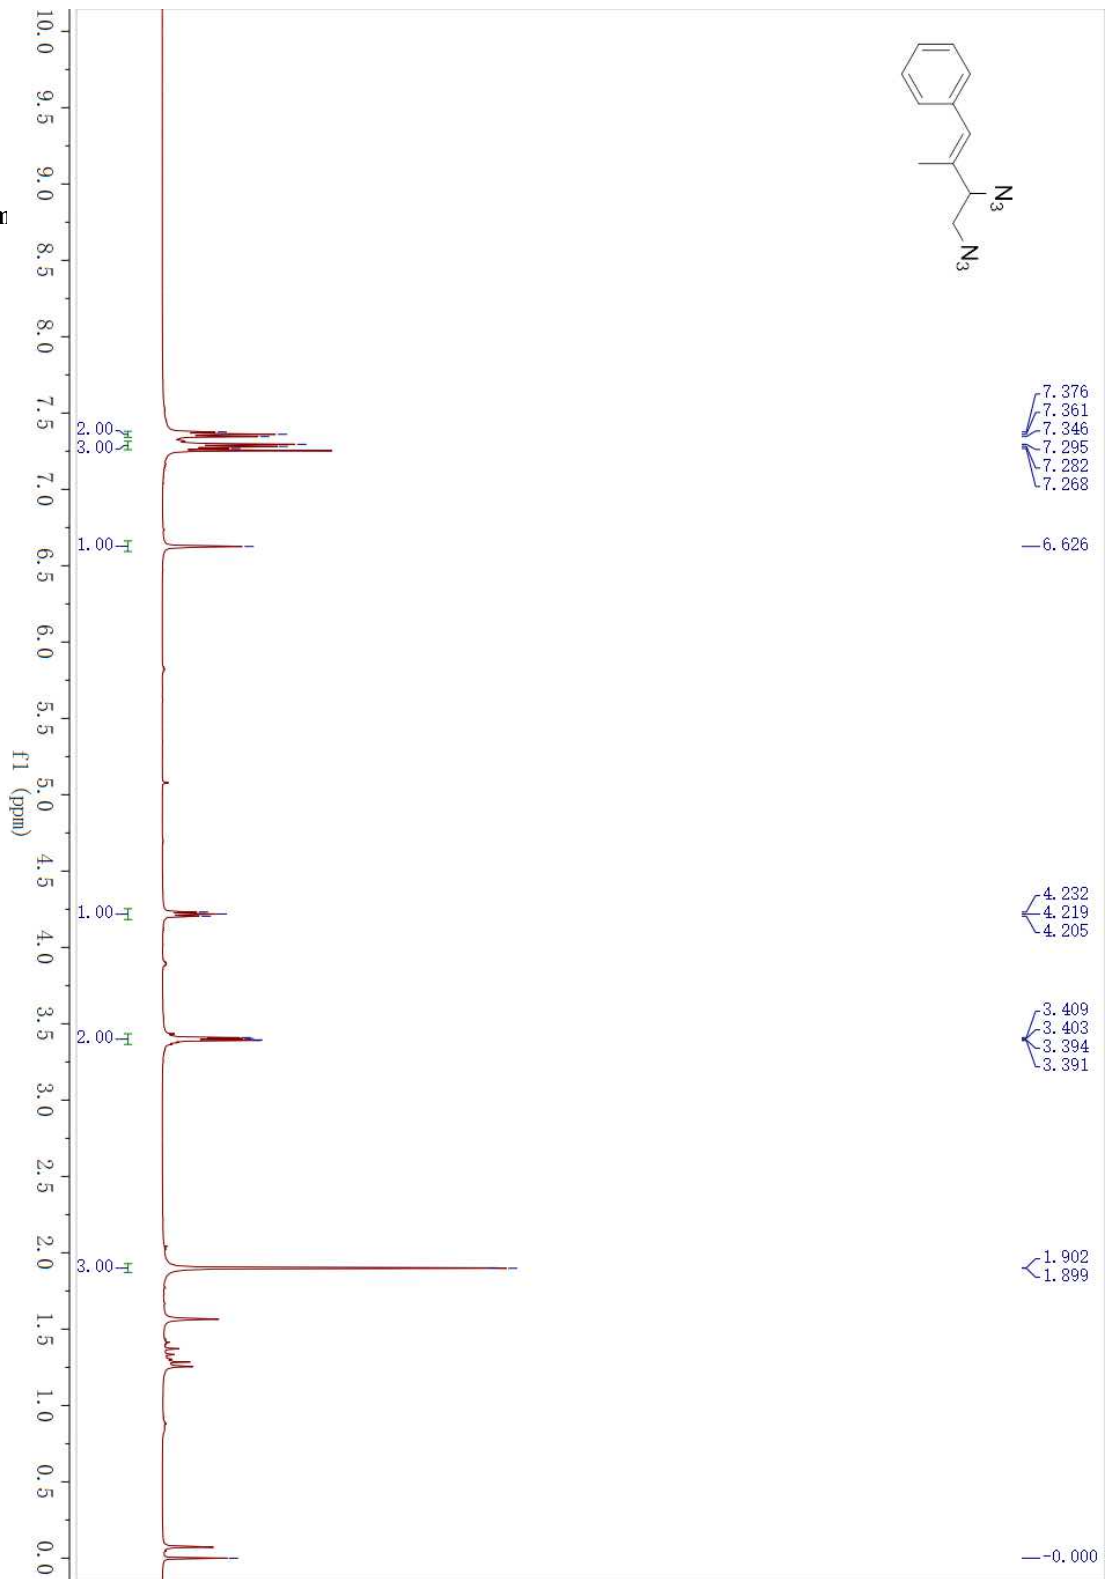

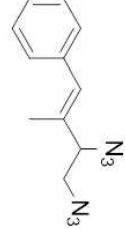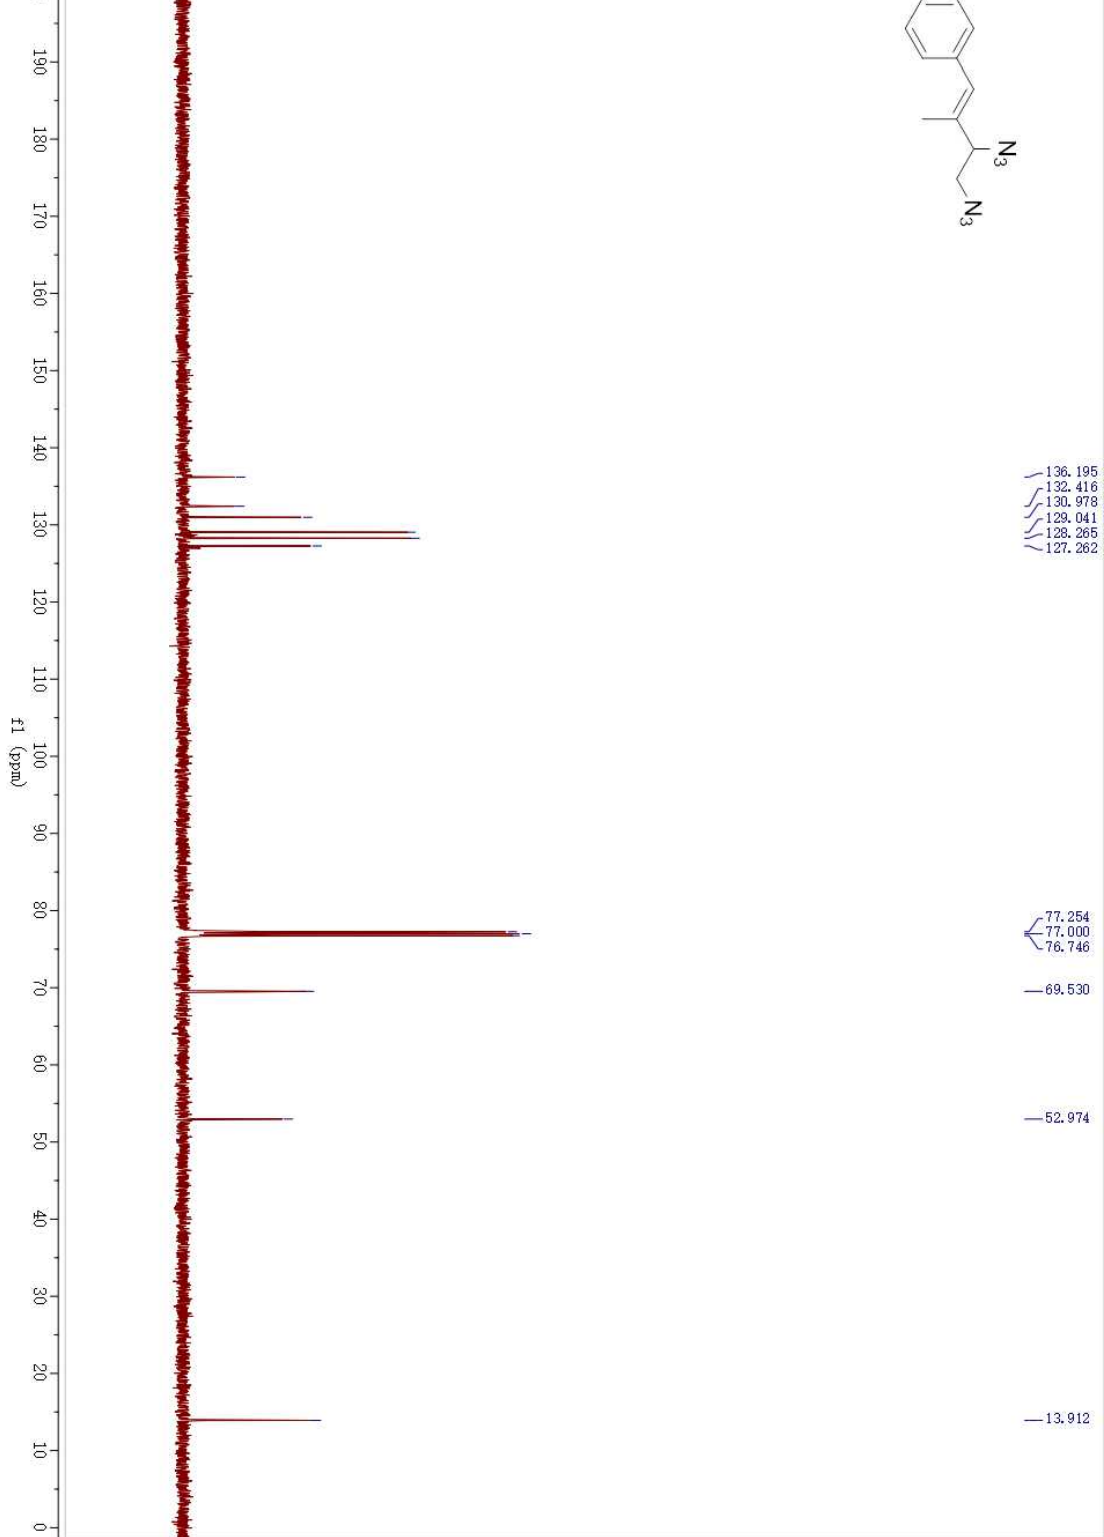

**(E)-2-(1,2-diazid**

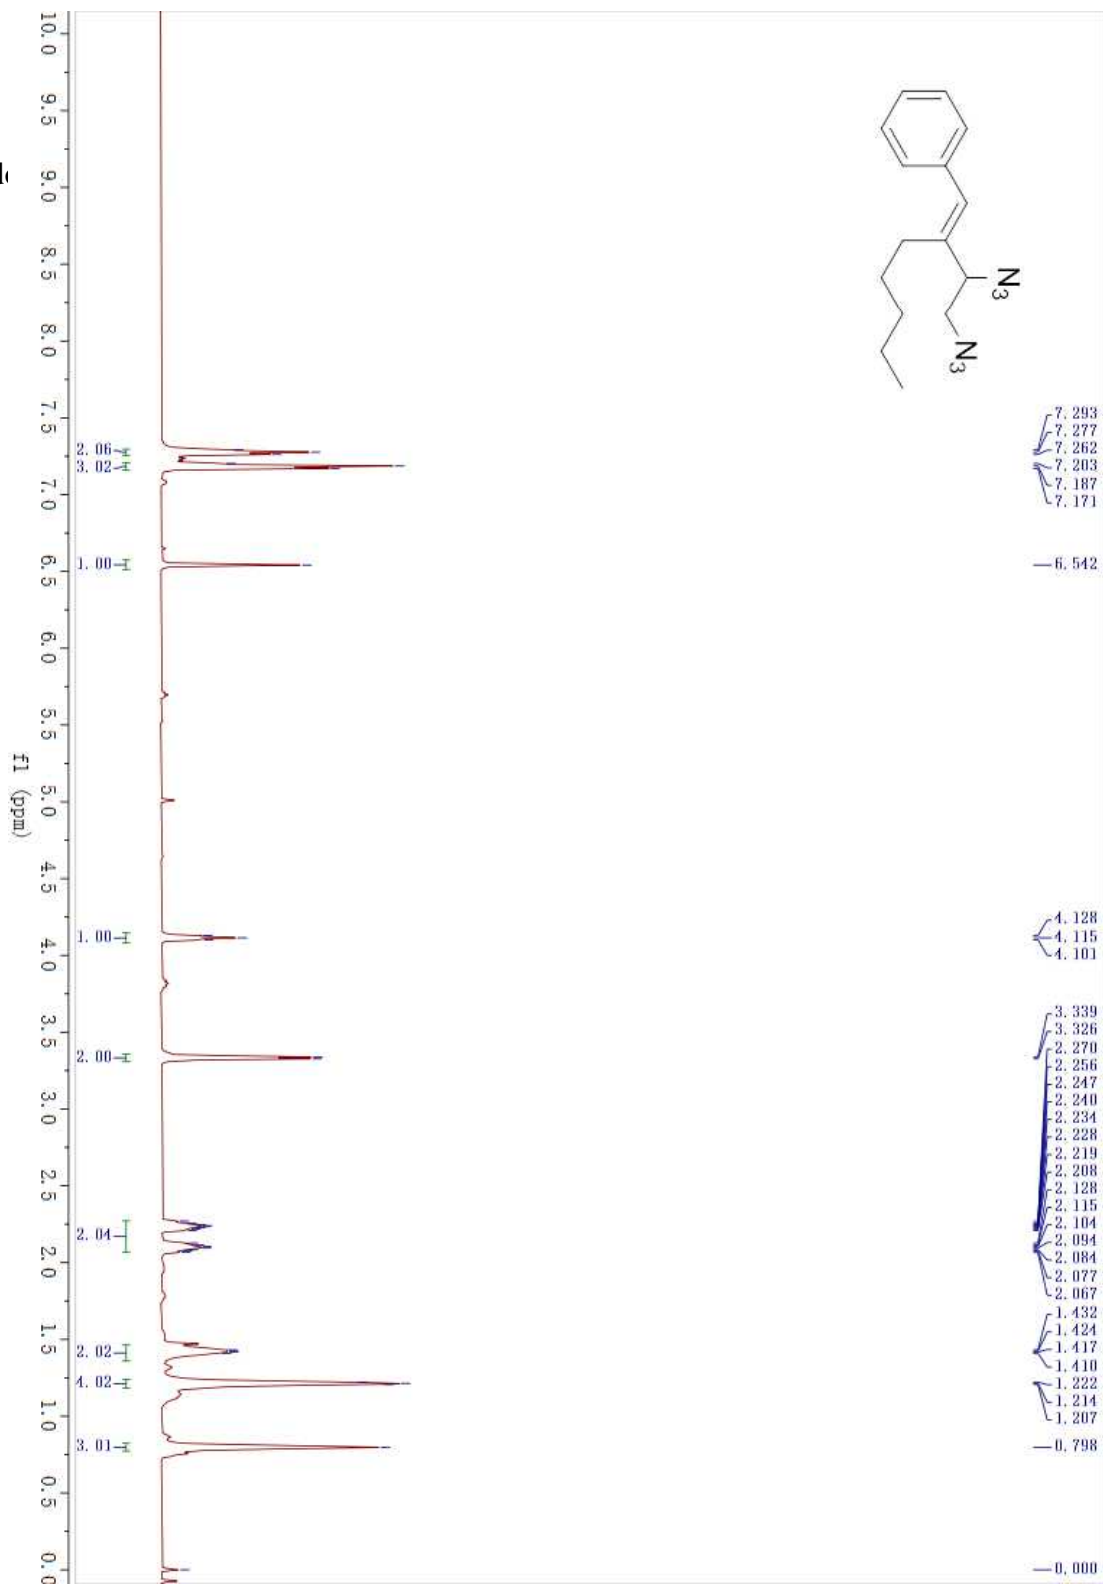

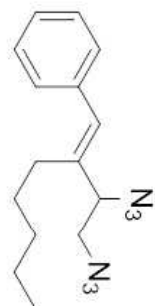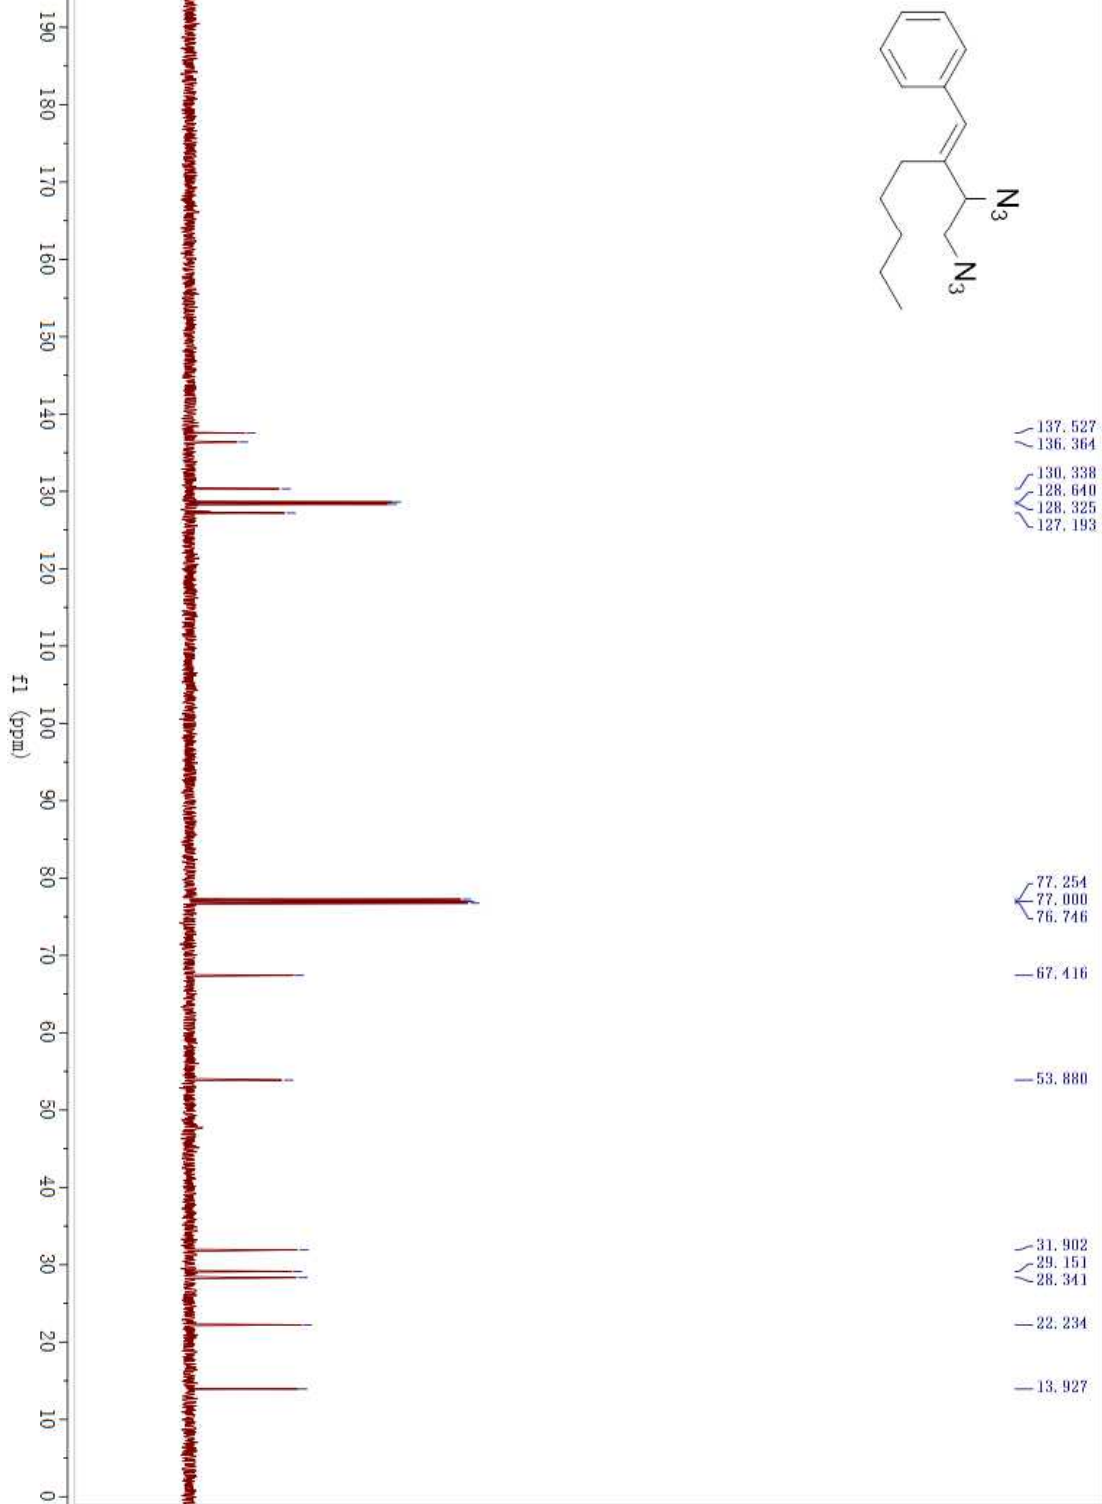



**(E)-2-(1,2-diazid**

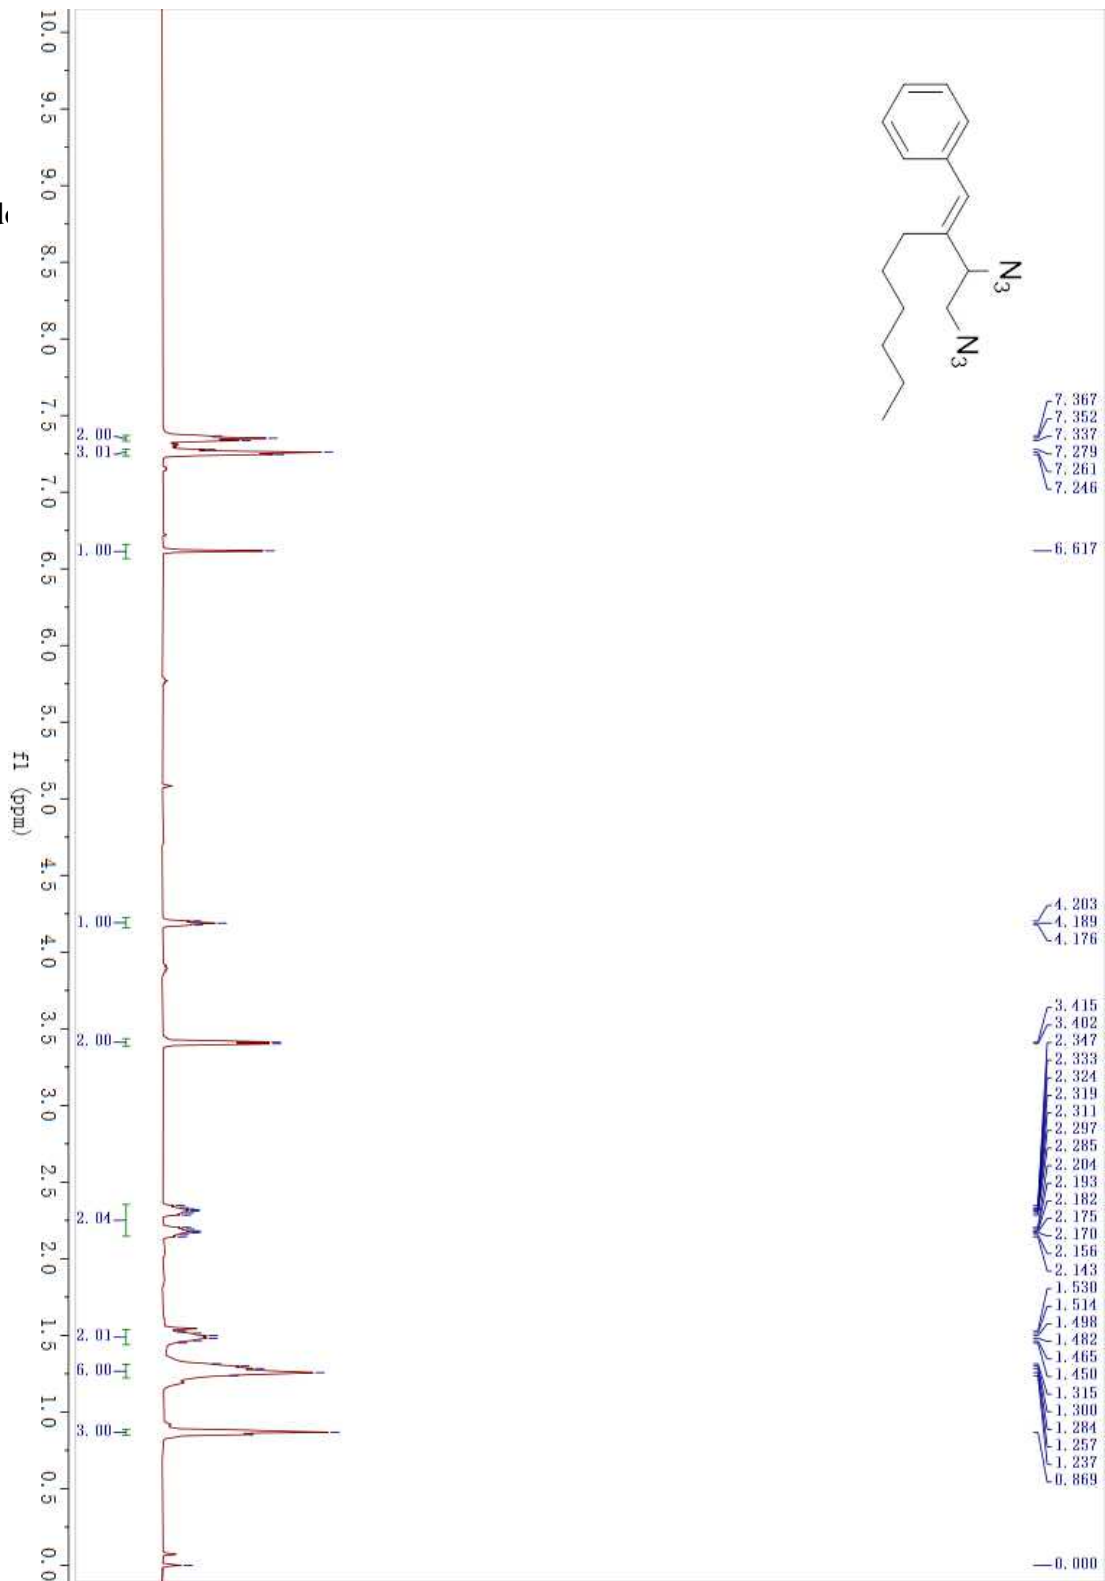

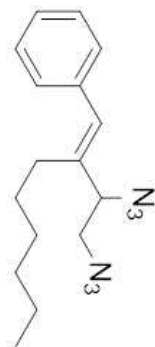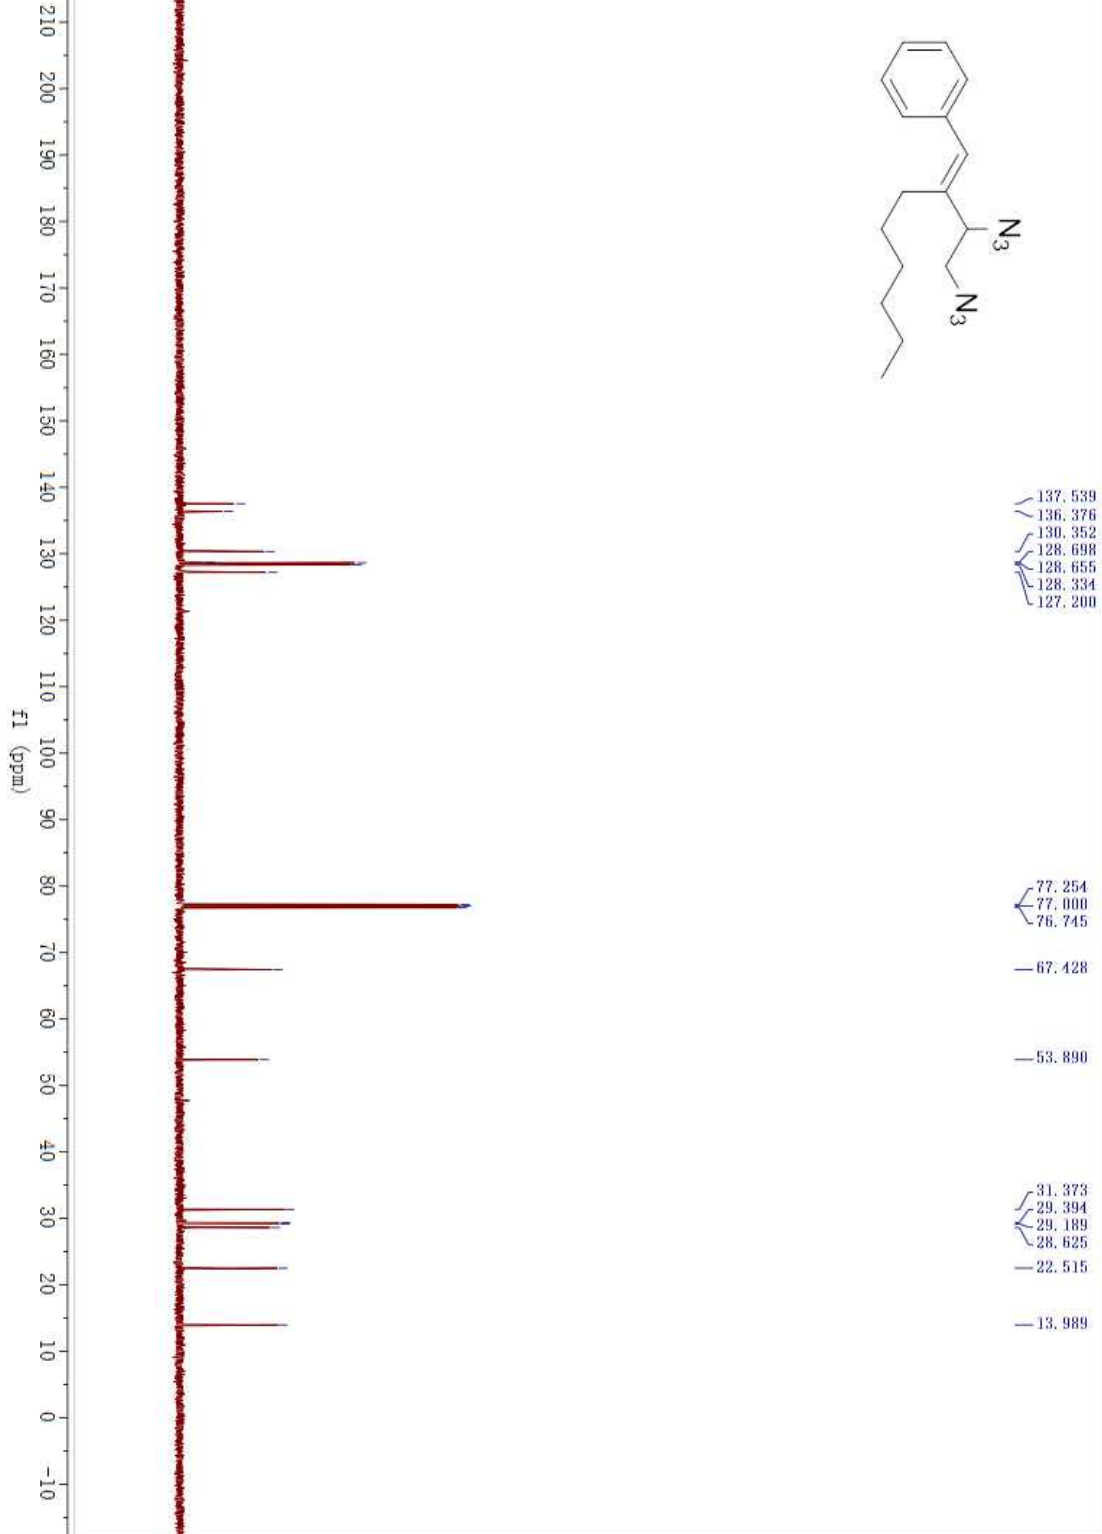

**(3,4-diazidobut-1-**

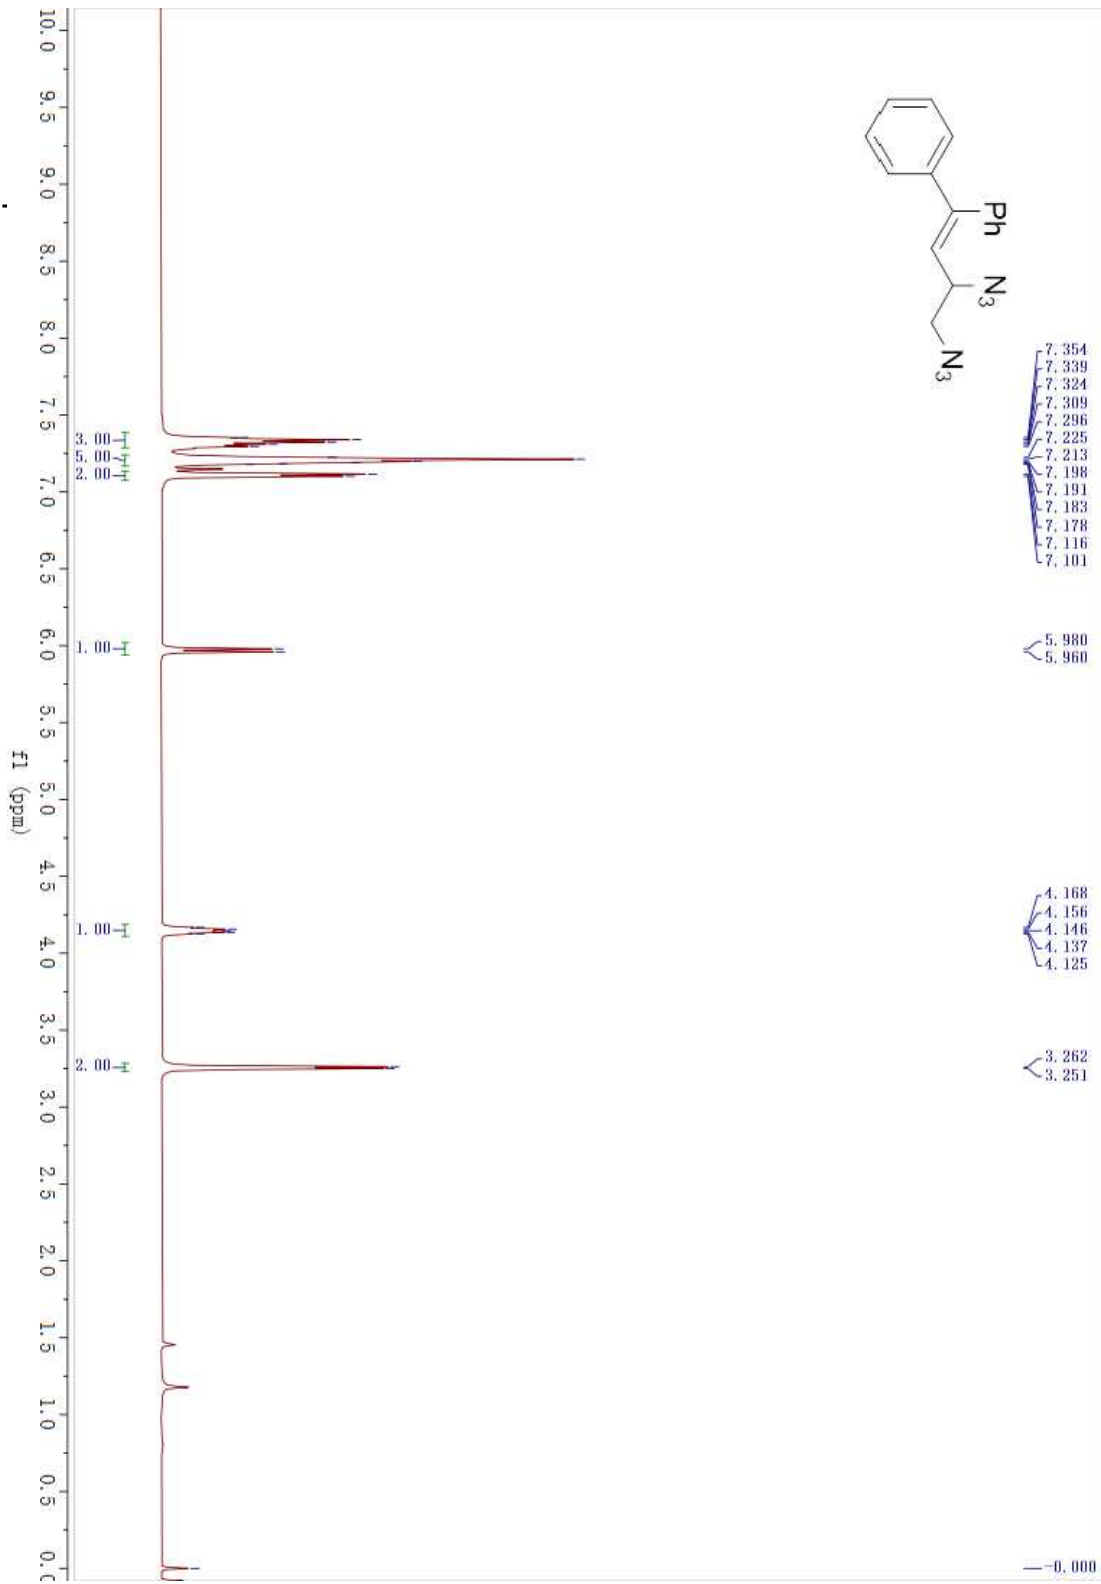

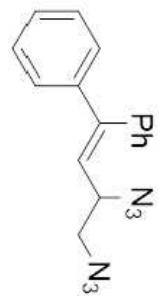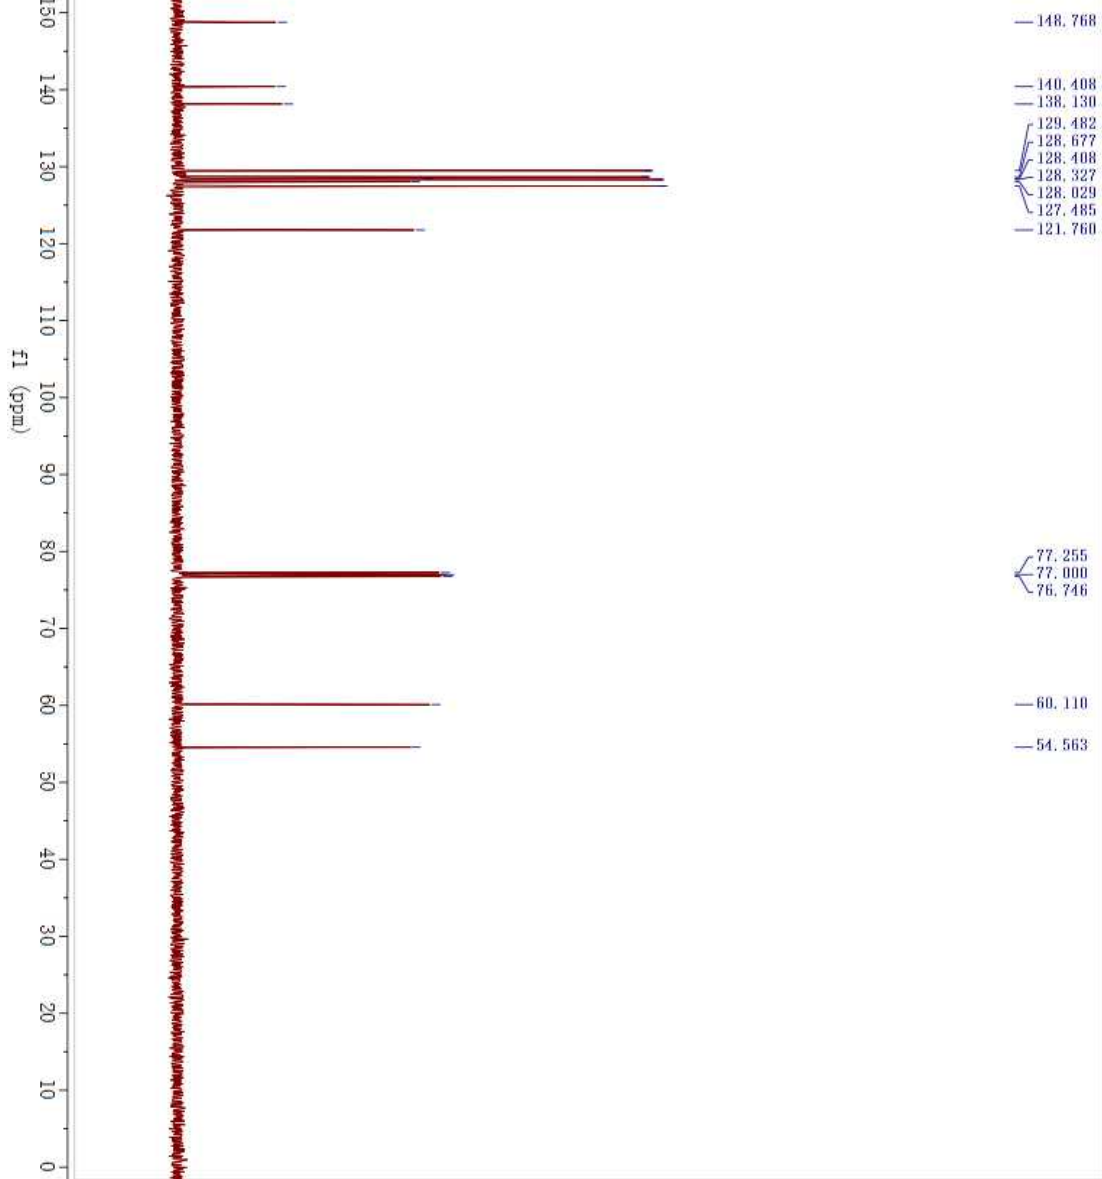

**(E)-1-(3,4-diazido**

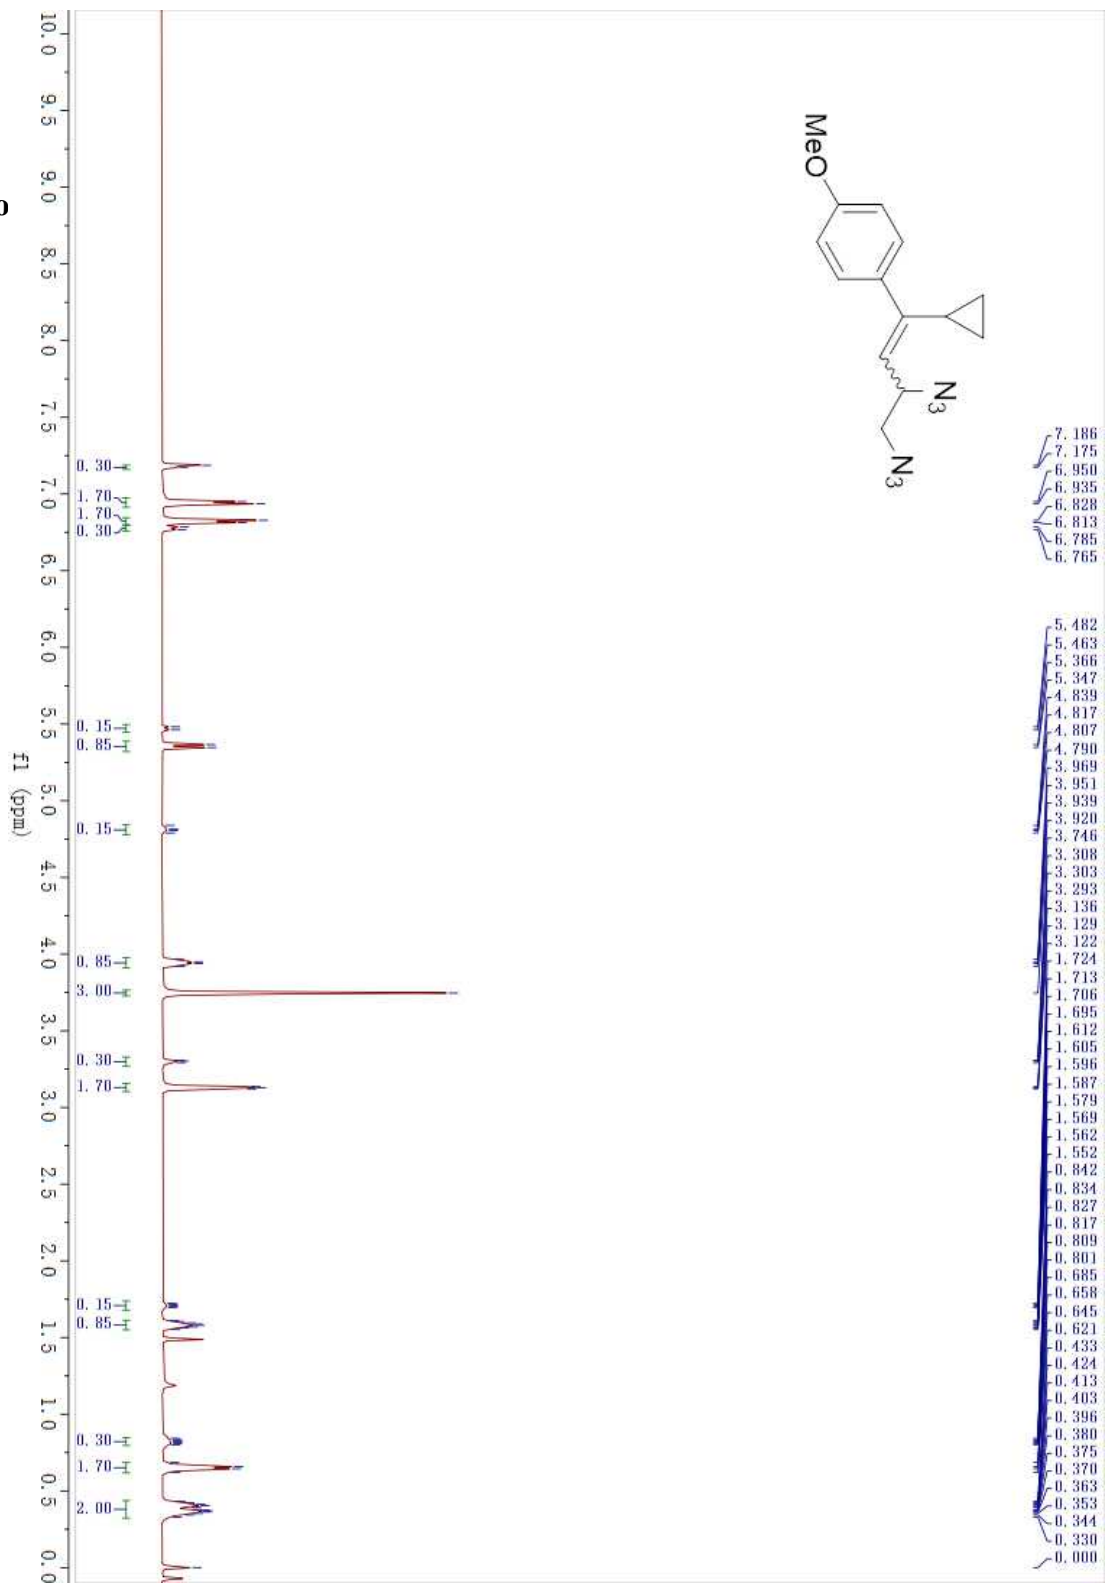

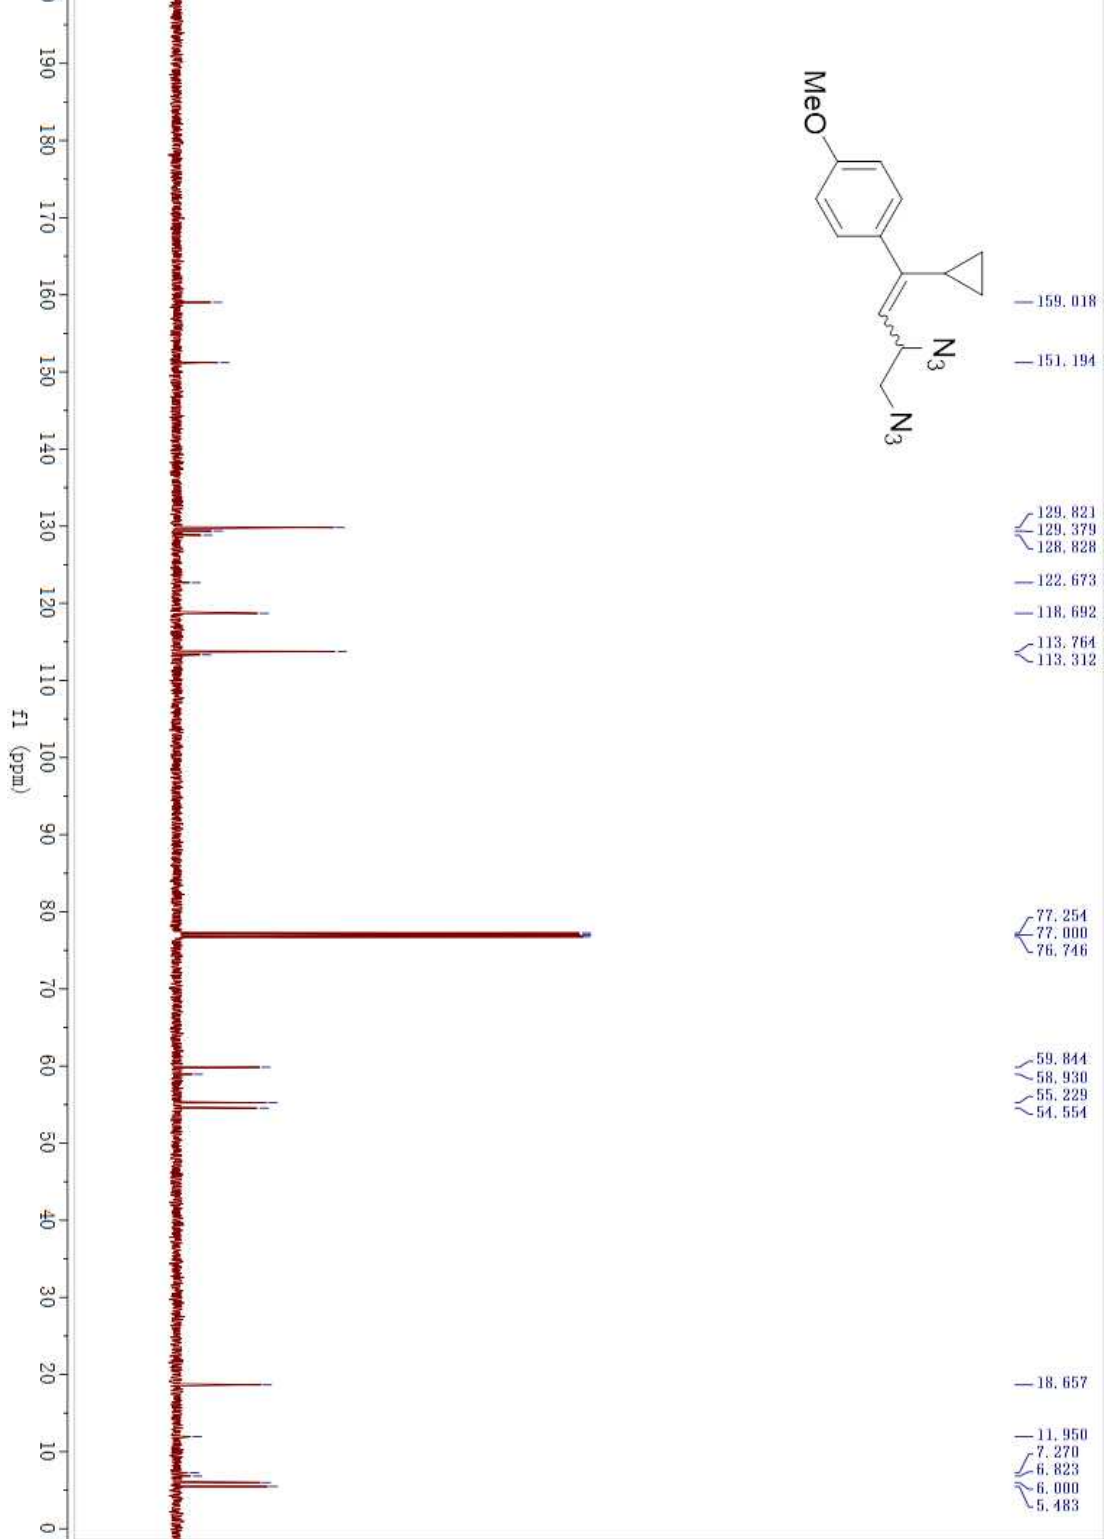

1-(1,2-diazidoethyl)-

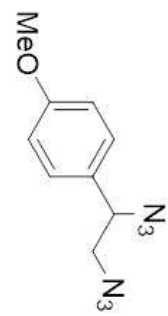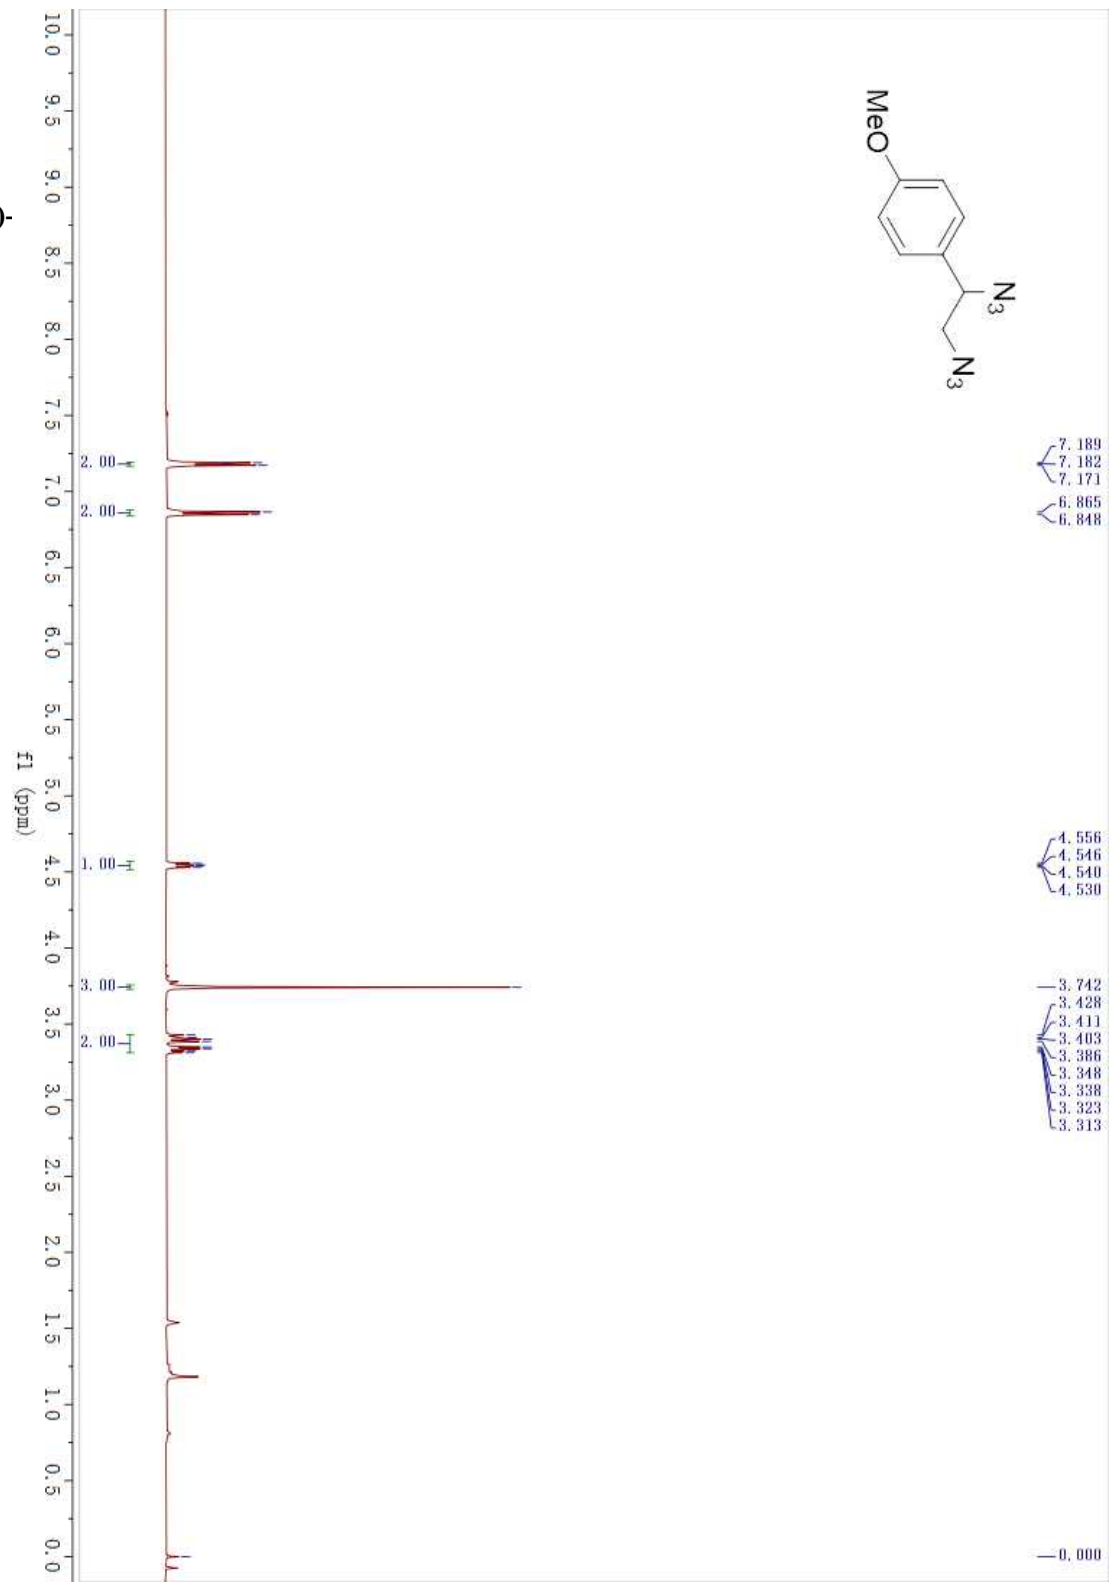

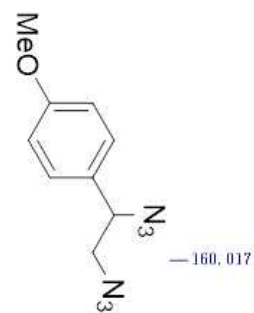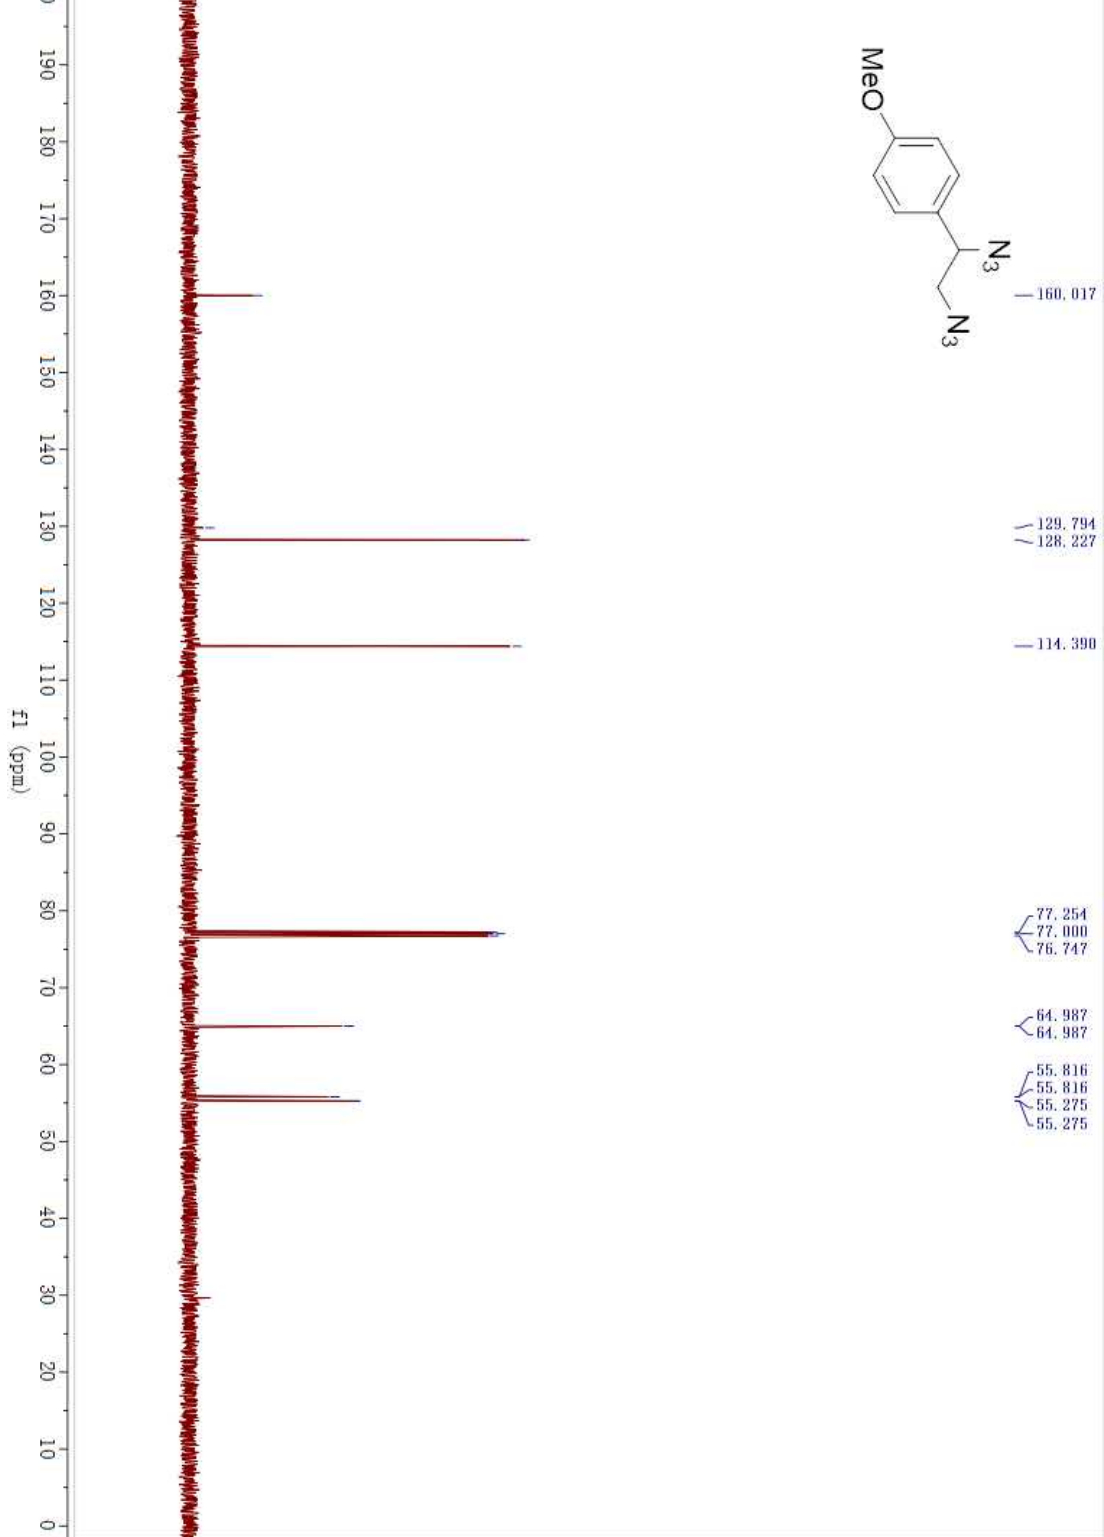



# 1-(1,2-diaziidoethy

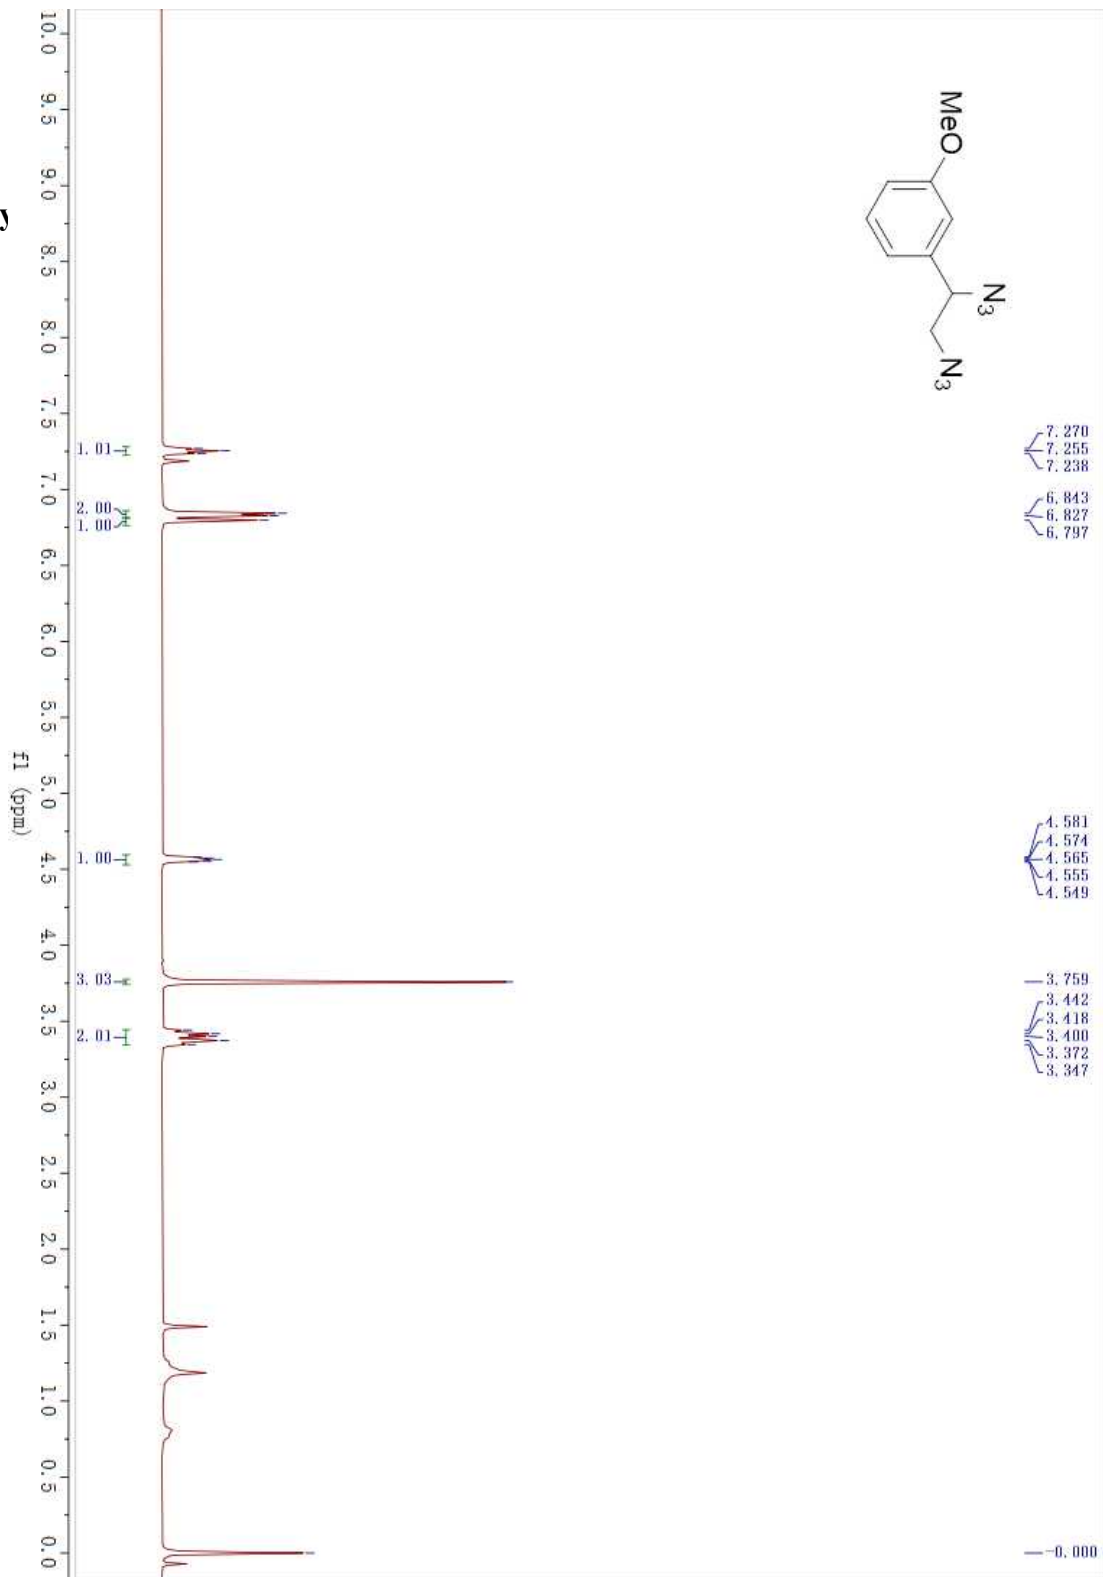

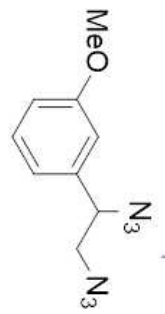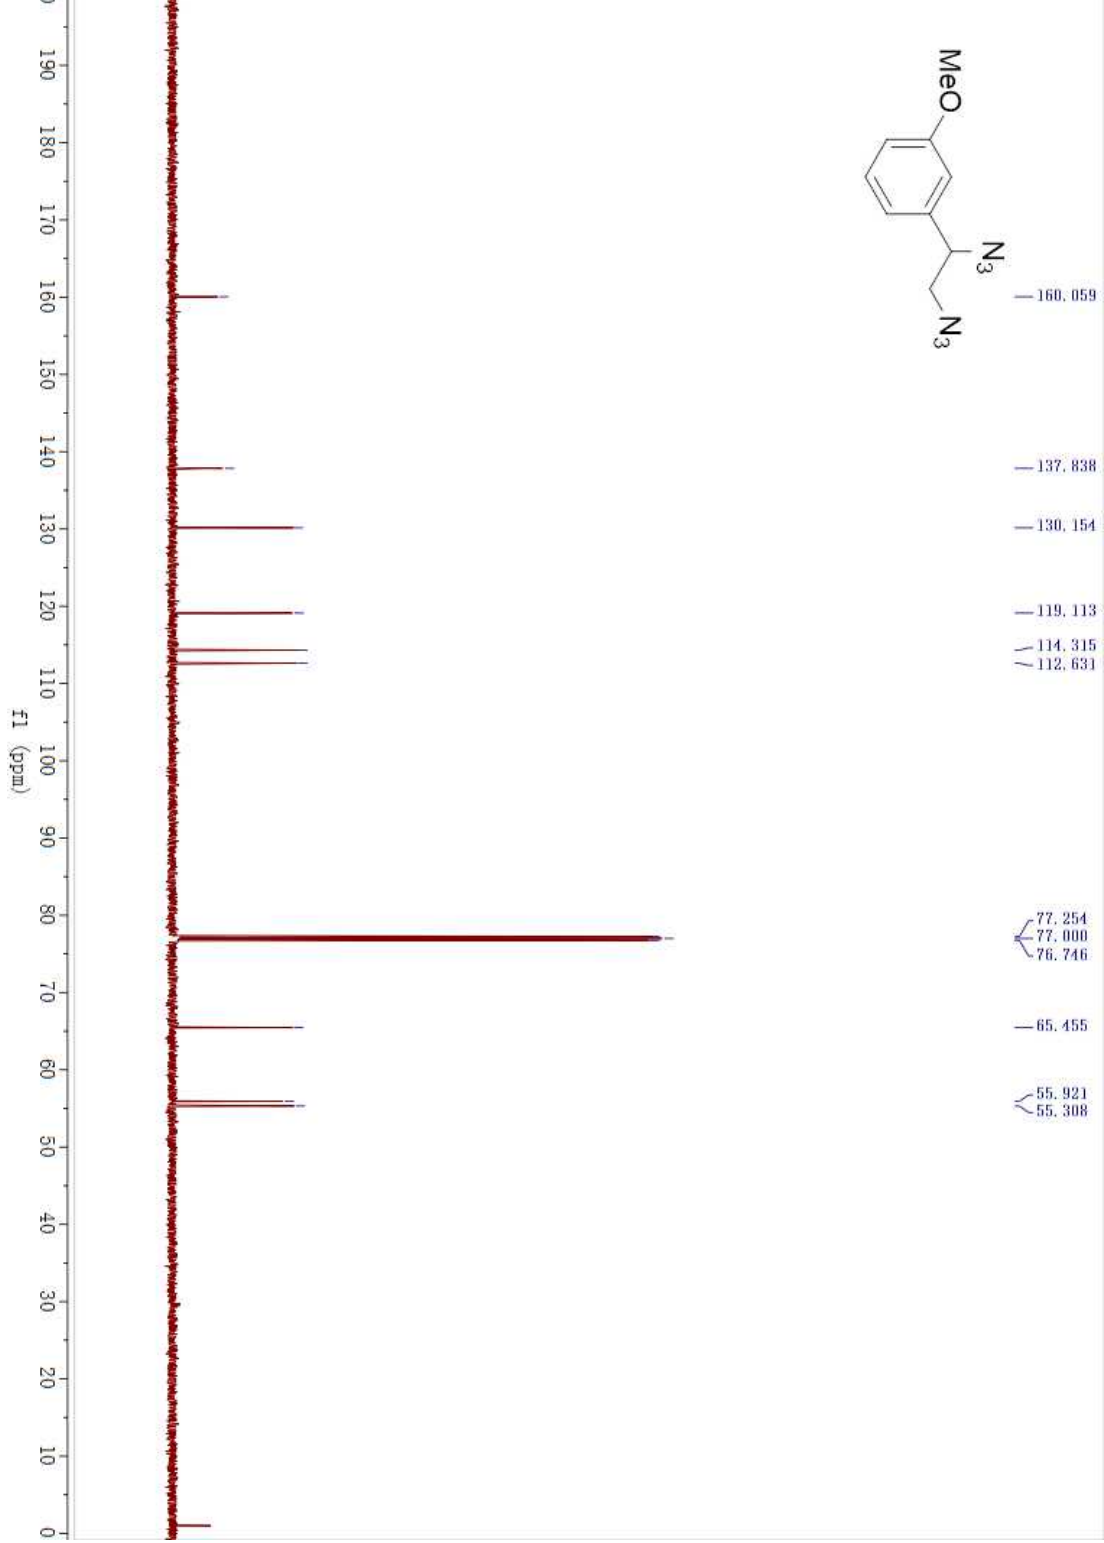

# 1-(1,2-diazidoethy

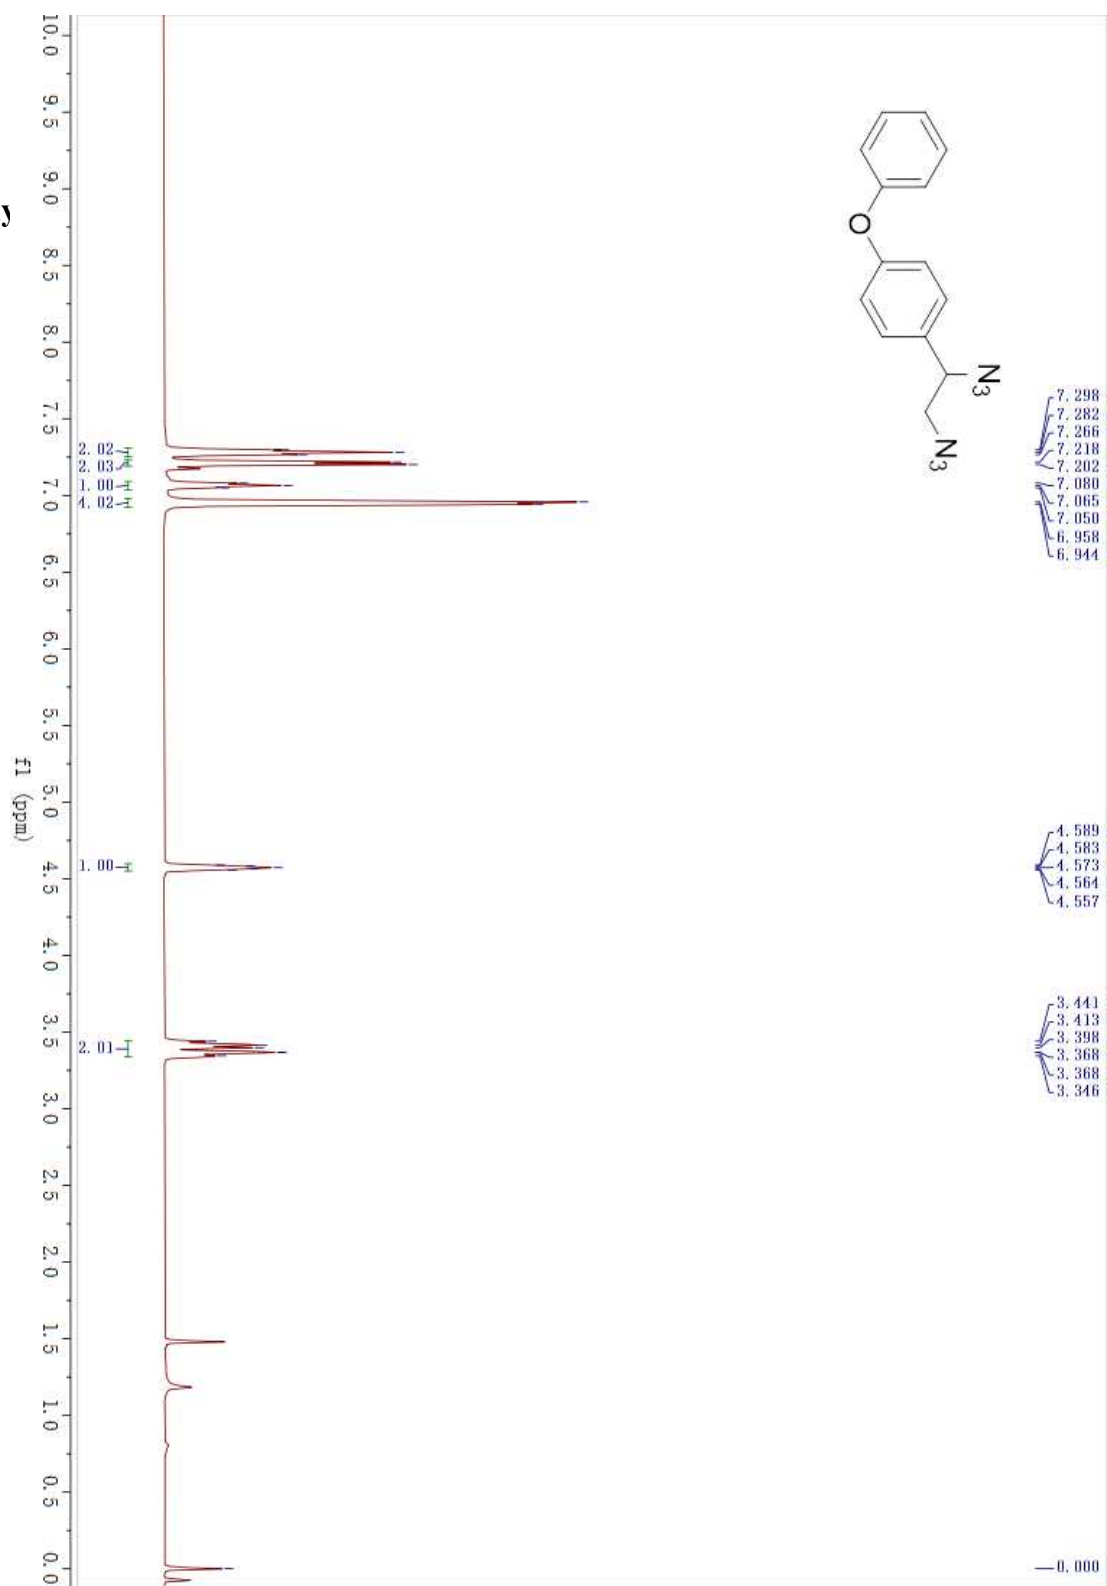

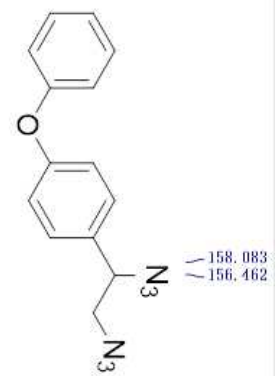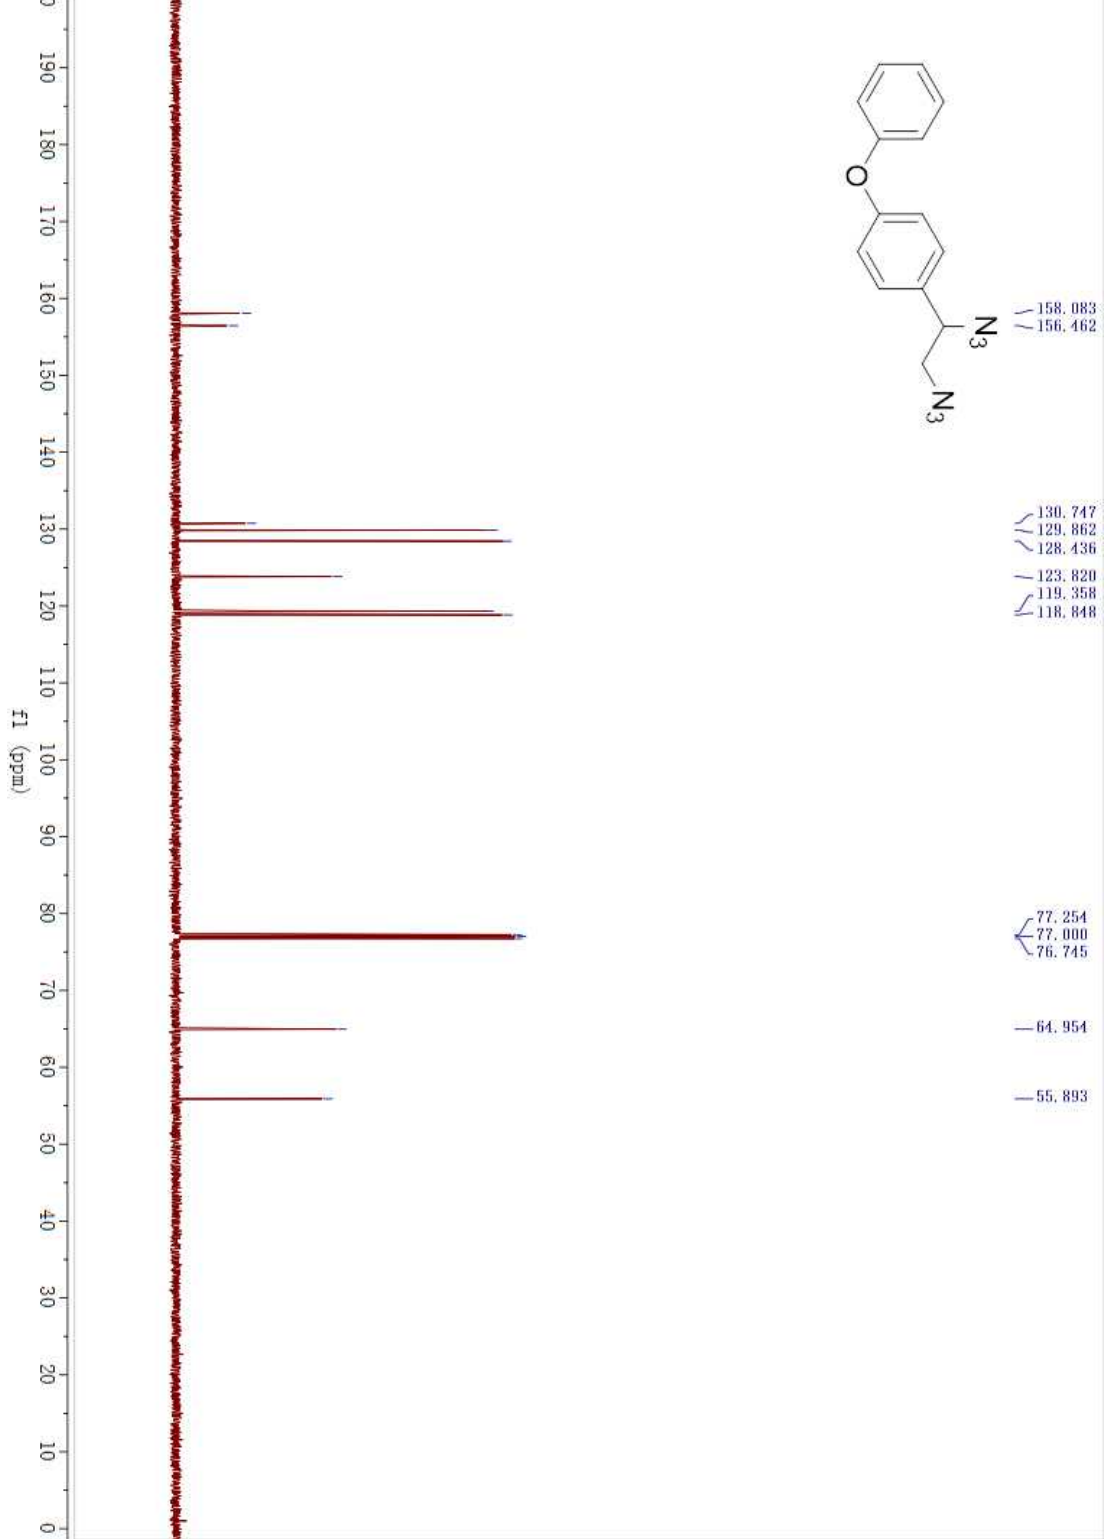

2-((2,2,6,6-tetramethylpiperidin-1-yl)oxy)acetonitrile

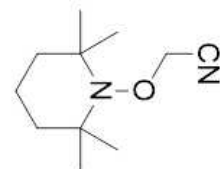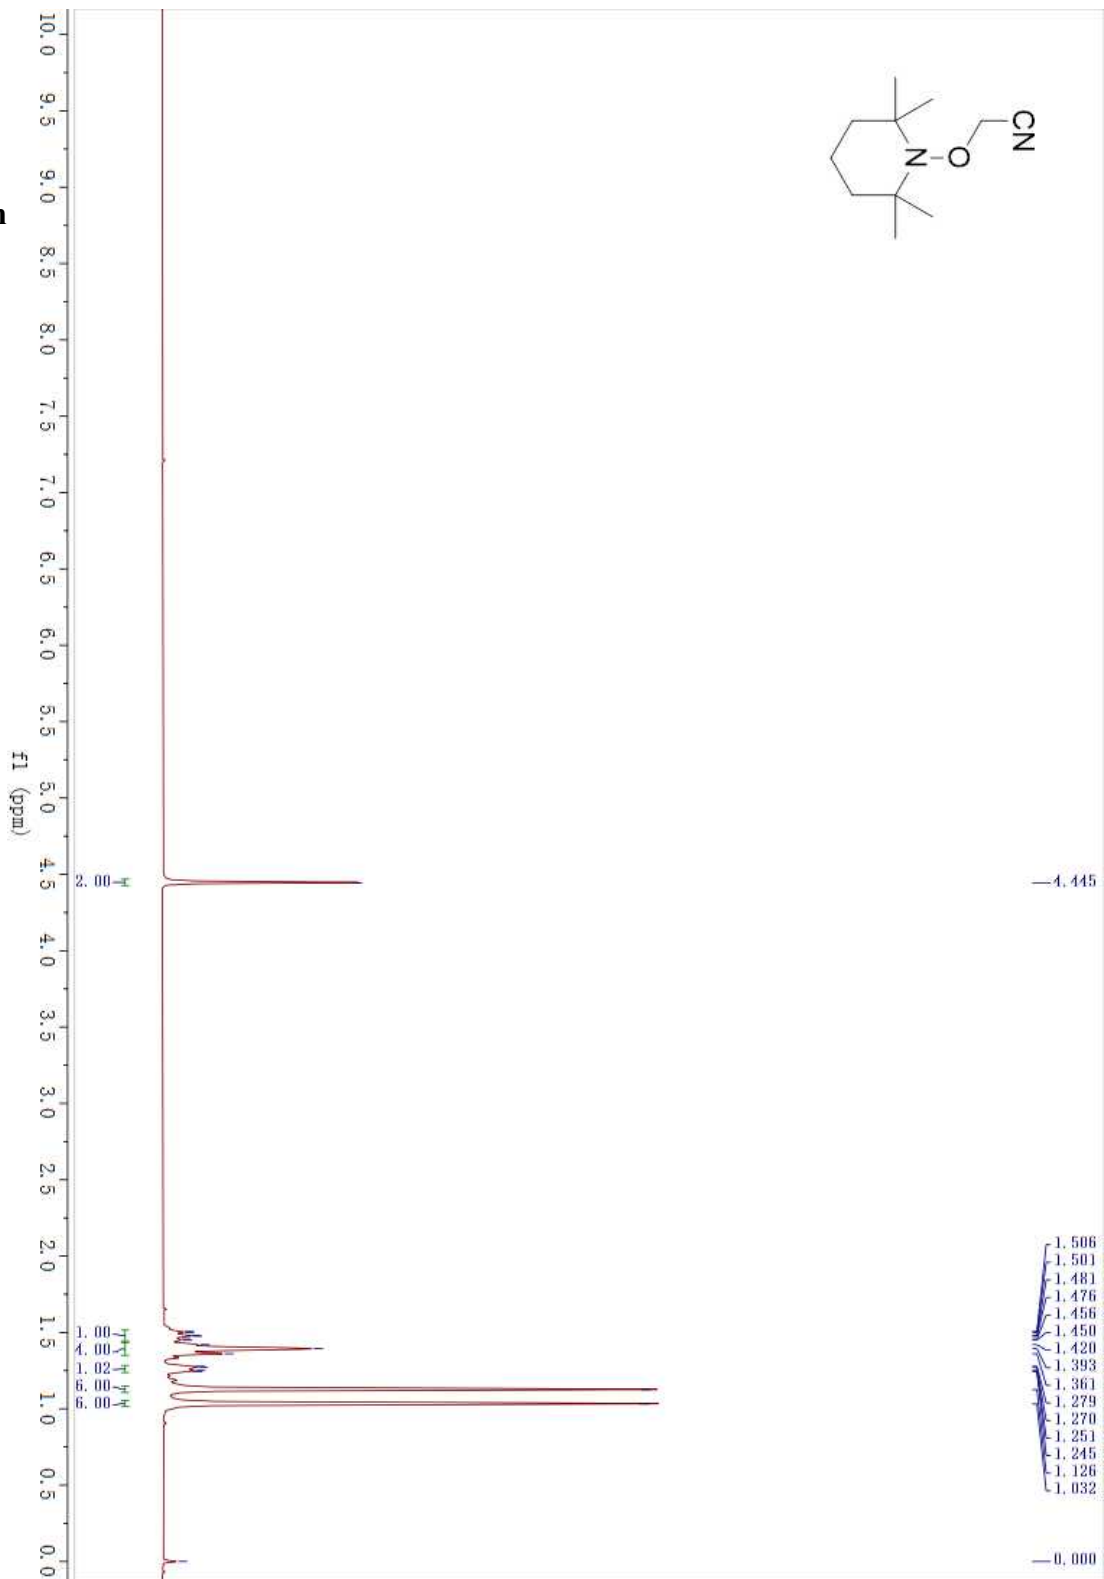

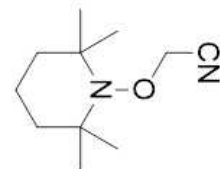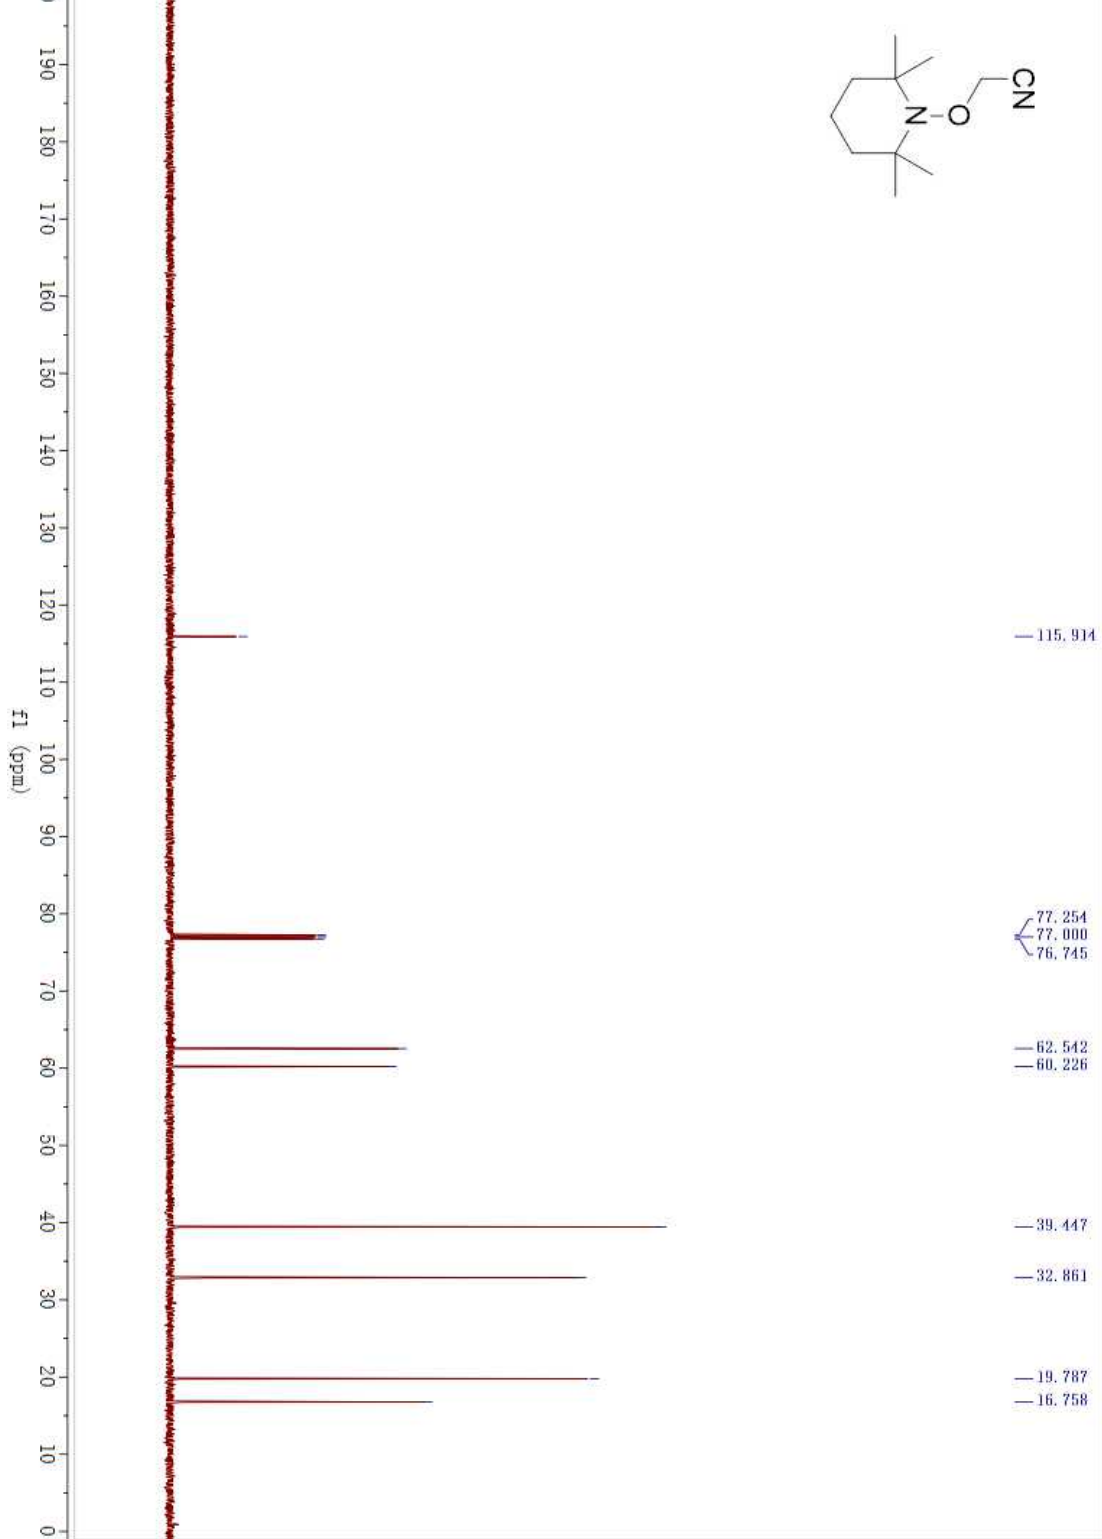

Supplement: d4ob01661k1.pdf [file d4ob01661k1.pdf]
